# Supplementary material for: Increased intramuscular fat induced by reduced dietary protein in finishing pigs: effects on the longissimus lumborum muscle proteome
Source: Royal Society of Chemistry journal article supplement (doi:10.1039/c6mb00213g), 2016-06-01
Supplement: c6mb00213g3.xlsx [file c6mb00213g3.xlsx]

## Sheet: Results Summary - Non-corrected
Protein	N	Mean A	S.d. A	C.v. A	Mean B	S.d. B	C.v. B	Fold Change A vs B	t-test (A vs B)	log2 fold change	-log10 p-value
Q9TV61-Myosin-1 OS=Sus scrofa GN=MYH1 PE=2 SV=1	4532	11.3771	9.43549	82.934	13.6229	9.87361	72.4781	-1.1974	2.69523e-28	-0.259899	27.5694
F1SS64-Myosin-1 OS=Sus scrofa GN=MYH1 PE=4 SV=1	3712	11.4543	9.68099	84.5181	13.5457	9.91903	73.2266	-1.18258	4.93752e-20	-0.241938	19.3065
F1SHL9-Pyruvate kinase (Fragment) OS=Sus scrofa GN=PKM PE=3 SV=2	744	14.3431	9.86632	68.788	10.6569	7.21975	67.7471	1.34589	4.74848e-16	0.428566	15.3234
F1RFY2-Beta-enolase OS=Sus scrofa GN=ENO3 PE=3 SV=1	568	14.4357	9.6736	67.0117	10.5643	7.15676	67.7447	1.36646	4.20195e-14	0.450441	13.3765
P00355-Glyceraldehyde-3-phosphate dehydrogenase OS=Sus scrofa GN=GAPDH PE=1 SV=4	440	14.6606	9.42885	64.3142	10.3394	7.09506	68.6216	1.41794	4.80397e-14	0.503793	13.3184
Q9TV62-Myosin-4 OS=Sus scrofa GN=MYH4 PE=2 SV=1	5492	11.8148	9.5292	80.6547	13.1852	9.5728	72.6027	-1.11599	5.99296e-14	-0.158323	13.2224
P00339-L-lactate dehydrogenase A chain OS=Sus scrofa GN=LDHA PE=1 SV=3	196	14.7936	8.83291	59.7076	10.2064	6.20777	60.8224	1.44945	7.14054e-09	0.535502	8.14627
Q5XLD3-Creatine kinase M-type OS=Sus scrofa GN=CKM PE=2 SV=1	408	14.2287	11.6714	82.0272	10.7713	8.32352	77.2752	1.32099	1.39606e-06	0.401616	5.8551
A1XQT6-MLC1f OS=Sus scrofa GN=MYL1 PE=2 SV=1	144	14.4703	9.98927	69.0329	10.5297	6.92031	65.7219	1.37424	0.000134277	0.458631	3.872
F1RU49-Uncharacterized protein OS=Sus scrofa GN=LOC100519531 PE=4 SV=1	408	13.5198	9.33307	69.0327	11.4802	7.73617	67.387	1.17766	0.000722589	0.235923	3.14111
A4Z6H0-Adenylosuccinate synthetase isozyme 1 OS=Sus scrofa GN=ADSSL1 PE=2 SV=1	20	14.9072	5.01157	33.6184	10.0928	2.58207	25.5834	1.47702	0.000864794	0.562692	3.06309
F1RUN2-Serum albumin OS=Sus scrofa GN=ALB PE=4 SV=1	176	14.2063	10.1038	71.1218	10.7937	9.3473	86.5993	1.31616	0.00114404	0.396334	2.94156
K7GMH0-Uncharacterized protein (Fragment) OS=Sus scrofa GN=MYH6 PE=4 SV=1	1752	12.0529	9.13753	75.8117	12.9471	8.46897	65.4123	-1.07418	0.00269119	-0.103241	2.57006
F1RJW7-Calsequestrin OS=Sus scrofa GN=CASQ1 PE=2 SV=2	44	14.1476	5.50886	38.9386	10.8524	4.40946	40.6311	1.30363	0.00297054	0.382536	2.52717
B5KJG2-Phosphoglycerate mutase 2 OS=Sus scrofa GN=PGAM2 PE=2 SV=1	64	14.9432	10.7851	72.174	10.0568	7.2534	72.1245	1.48589	0.00350292	0.571324	2.45557
F1S9D6-Myosin-7 OS=Sus scrofa GN=MYH7 PE=4 SV=1	1812	12.0964	8.90349	73.6045	12.9036	8.30624	64.3714	-1.06673	0.00481119	-0.0931976	2.31775
P68137-Actin, alpha skeletal muscle OS=Sus scrofa GN=ACTA1 PE=3 SV=1	1204	12.0198	8.53652	71.0203	12.9802	9.22837	71.0959	-1.0799	0.0081113	-0.110893	2.09091
F1SRS2-Uncharacterized protein OS=Sus scrofa GN=LOC100302368 PE=3 SV=1	20	16.0646	9.83547	61.2243	8.93535	4.66462	52.2041	1.79787	0.00815463	0.846292	2.0886
F1SS66-Uncharacterized protein OS=Sus scrofa GN=MYH13 PE=4 SV=2	1176	12.0472	9.6813	80.3615	12.9528	8.84408	68.2792	-1.07517	0.0179925	-0.104571	1.74491
Q2HYU2-ATP-dependent 6-phosphofructokinase, muscle type OS=Sus scrofa GN=PFKM PE=2 SV=1	96	13.9519	8.89106	63.7266	11.0481	8.26833	74.8393	1.26283	0.0208048	0.336661	1.68184
F1S9Q1-Uncharacterized protein OS=Sus scrofa PE=3 SV=2	8	14.5634	2.97511	20.4287	10.4366	2.97113	28.4685	1.39542	0.021108	0.480702	1.67555
F1S814-Uncharacterized protein OS=Sus scrofa GN=PGM1 PE=3 SV=2	136	13.7251	9.45985	68.924	11.2749	8.44036	74.8594	1.21731	0.0255582	0.283691	1.59247
F1SGI7-Uncharacterized protein (Fragment) OS=Sus scrofa GN=KRT75 PE=3 SV=2	16	14.5443	3.69832	25.428	10.4557	5.83511	55.8077	1.39103	0.0304579	0.476153	1.5163
F2Z5B6-Tropomyosin alpha-1 chain OS=Sus scrofa GN=TPM1 PE=3 SV=1	28	14.4599	7.78457	53.8355	10.5401	4.87903	46.2902	1.37189	0.031676	0.45617	1.49927
F1RH19-Uncharacterized protein OS=Sus scrofa GN=MYBPC2 PE=4 SV=2	276	13.2587	9.11146	68.7207	11.7413	7.3684	62.7561	1.12923	0.0322248	0.175339	1.49181
F1RM74-Glyceraldehyde-3-phosphate dehydrogenase OS=Sus scrofa GN=GAPDHS PE=3 SV=1	28	15.5481	12.2396	78.721	9.45189	7.66643	81.11	1.64497	0.0334499	0.718065	1.47561
I3LKC9-Uncharacterized protein OS=Sus scrofa PE=3 SV=1	12	3.61308	9.46897	262.074	21.3869	23.2671	108.791	-5.9193	0.033564	-2.56543	1.47413
F1S317-Uncharacterized protein OS=Sus scrofa GN=AKAP9 PE=4 SV=1	4	15.1152	2.0475	13.546	9.88483	2.73783	27.6973	1.52913	0.0409559	0.61271	1.38768
F1RII7-Hemoglobin subunit beta OS=Sus scrofa GN=HBB PE=3 SV=1	4	13.9795	0.653597	4.6754	11.0205	1.69599	15.3894	1.2685	0.0496692	0.343119	1.30391
Q5XLD2-Myosin regulatory light chain 2 OS=Sus scrofa GN=HUMMLC2B PE=2 SV=1	72	13.6982	7.91765	57.8006	11.3018	6.84212	60.5402	1.21204	0.055684	0.277439	1.25427
F1S7C4-Uncharacterized protein (Fragment) OS=Sus scrofa GN=ATP13A1 PE=3 SV=1	8	13.816	3.25371	23.5504	11.184	3.0656	27.4105	1.23533	0.1417	0.304897	0.84863
F1RHL9-Uncharacterized protein OS=Sus scrofa GN=ACTN2 PE=4 SV=1	32	11.0251	7.21862	65.4745	13.9749	8.34653	59.7251	-1.26756	0.141837	-0.342048	0.848211
F1SR85-Uncharacterized protein OS=Sus scrofa GN=ABCB6 PE=3 SV=1	12	15.3982	11.3655	73.8101	9.60177	5.84951	60.9212	1.60369	0.151545	0.681392	0.81946
F1SGG3-Uncharacterized protein OS=Sus scrofa GN=KRT1 PE=3 SV=1	12	15.2744	10.7294	70.2443	9.72556	6.00911	61.7868	1.57055	0.152557	0.651267	0.816569
F1SHX0-Uncharacterized protein (Fragment) OS=Sus scrofa GN=NEB PE=4 SV=2	12	13.3335	2.94003	22.0499	11.6665	2.35359	20.1739	1.14289	0.15691	0.192684	0.80435
I3LP41-Malate dehydrogenase OS=Sus scrofa GN=MDH2 PE=3 SV=1	4	14.7883	4.27107	28.8814	10.2117	1.36677	13.3844	1.44818	0.15959	0.534238	0.796994
Q5S1S4-Carbonic anhydrase 3 OS=Sus scrofa GN=CA3 PE=2 SV=3	88	13.2714	7.18399	54.1316	11.7286	7.62803	65.0375	1.13153	0.17145	0.178278	0.765862
F1SM75-Uncharacterized protein OS=Sus scrofa GN=MYOM1 PE=4 SV=2	32	13.495	6.37479	47.2383	11.505	5.18591	45.0751	1.17296	0.182696	0.230153	0.73827
P00571-Adenylate kinase isoenzyme 1 OS=Sus scrofa GN=AK1 PE=1 SV=1	40	13.1702	4.2835	32.5242	11.8298	4.53274	38.3163	1.11331	0.183422	0.154854	0.736549
I3LAR4-Uncharacterized protein OS=Sus scrofa GN=LOC100736851 PE=4 SV=1	16	10.1165	6.32703	62.5416	14.8835	12.3518	82.9903	-1.47121	0.196816	-0.557	0.70594
F1RPH0-Phosphoglycerate kinase (Fragment) OS=Sus scrofa GN=PGK1 PE=3 SV=2	132	13.2413	9.81442	74.1196	11.7587	10.1848	86.6148	1.12609	0.231309	0.171322	0.635807
F1SHW9-Uncharacterized protein (Fragment) OS=Sus scrofa PE=4 SV=2	52	11.6865	5.46733	46.7833	13.3135	9.01805	67.7362	-1.13922	0.273712	-0.188047	0.562705
F1SS61-Uncharacterized protein OS=Sus scrofa GN=MYH3 PE=4 SV=1	1260	12.3125	8.98991	73.0143	12.6875	8.17781	64.4558	-1.03045	0.273745	-0.0432783	0.562654
I3LIE7-Uncharacterized protein OS=Sus scrofa GN=MYBPH PE=4 SV=1	4	13.2126	0.860827	6.51518	11.7874	1.81188	15.3713	1.12091	0.281652	0.164676	0.550287
F1S5T8-Olfactory receptor (Fragment) OS=Sus scrofa GN=LOC100738138 PE=3 SV=2	8	10.0405	3.19422	31.8133	14.9595	11.0569	73.9123	-1.48991	0.290279	-0.575225	0.537184
F1SI85-Phosphoinositide phospholipase C (Fragment) OS=Sus scrofa GN=PLCL1 PE=4 SV=2	8	10.0405	3.19422	31.8133	14.9595	11.0569	73.9123	-1.48991	0.290279	-0.575225	0.537184
F1RJJ3-Uncharacterized protein OS=Sus scrofa GN=SBDS PE=4 SV=1	12	14.1458	8.59714	60.7753	10.8542	6.0143	55.4098	1.30325	0.310721	0.382117	0.507629
F1SN25-Uncharacterized protein (Fragment) OS=Sus scrofa GN=TRIM69 PE=4 SV=1	12	14.1458	8.59714	60.7753	10.8542	6.0143	55.4098	1.30325	0.310721	0.382117	0.507629
I3LEQ0-Oxysterol-binding protein OS=Sus scrofa GN=OSBPL9 PE=3 SV=1	12	14.1458	8.59714	60.7753	10.8542	6.0143	55.4098	1.30325	0.310721	0.382117	0.507629
F1RJ25-Uncharacterized protein OS=Sus scrofa GN=ALDOC PE=3 SV=2	64	13.5216	13.2682	98.1258	11.4784	10.3674	90.3207	1.178	0.337443	0.236341	0.4718
F1S6H1-Uncharacterized protein OS=Sus scrofa GN=LOC100737111 PE=3 SV=1	4	16.5656	6.77277	40.8845	8.43438	11.4409	135.646	1.96406	0.339123	0.973837	0.469643
Q0PY11-Elongation factor 1-alpha OS=Sus scrofa GN=EEF1A PE=2 SV=1	4	20.278	22.8924	112.893	4.72196	10.1472	214.894	4.29441	0.340653	2.10246	0.467687
I3LHN1-L-lactate dehydrogenase OS=Sus scrofa GN=LDHAL6A PE=3 SV=1	8	16.6117	18.812	113.245	8.38829	12.3125	146.782	1.98035	0.352184	0.985752	0.45323
F1S587-Uncharacterized protein OS=Sus scrofa GN=AP1M2 PE=4 SV=2	4	13.0104	0.939079	7.21791	11.9896	1.47343	12.2892	1.08514	0.357219	0.117881	0.447065
F1RSW2-Uncharacterized protein OS=Sus scrofa GN=FLT3 PE=3 SV=3	4	13.8934	3.80908	27.4166	11.1066	2.95234	26.5818	1.25091	0.357514	0.322975	0.446707
F1RVL5-Uncharacterized protein (Fragment) OS=Sus scrofa GN=MYOM2 PE=4 SV=2	64	13.0728	9.55624	73.1004	11.9272	7.8339	65.6808	1.09604	0.463261	0.132305	0.334174
F1SIH8-Uncharacterized protein OS=Sus scrofa GN=LOC100516776 PE=3 SV=2	4	6.56452	15.8655	241.686	18.4355	20.8193	112.931	-2.80835	0.46405	-1.48972	0.333435
F1RK48-Uncharacterized protein (Fragment) OS=Sus scrofa GN=SRL PE=4 SV=2	20	12.0065	3.77248	31.4202	12.9935	4.53698	34.9174	-1.0822	0.470583	-0.113963	0.327364
F1S557-Uncharacterized protein OS=Sus scrofa GN=AGL PE=4 SV=1	8	10.7569	8.41281	78.2082	14.2431	10.1336	71.148	-1.32408	0.495598	-0.40499	0.30487
F1RIC4-Uncharacterized protein OS=Sus scrofa GN=MS4A7 PE=4 SV=2	8	11.8588	1.74116	14.6824	13.1412	5.51591	41.9741	-1.10814	0.572923	-0.148146	0.241904
F1SNC1-Sperm flagellar protein 2 (Fragment) OS=Sus scrofa GN=SPEF2 PE=4 SV=2	8	11.8588	1.74116	14.6824	13.1412	5.51591	41.9741	-1.10814	0.572923	-0.148146	0.241904
F1SPW2-Uncharacterized protein OS=Sus scrofa GN=MAGEB5 PE=4 SV=2	8	11.8588	1.74116	14.6824	13.1412	5.51591	41.9741	-1.10814	0.572923	-0.148146	0.241904
F1SRI8-Uncharacterized protein (Fragment) OS=Sus scrofa GN=MYBPC1 PE=4 SV=2	24	13.2228	11.9262	90.1946	11.7772	4.80264	40.779	1.12274	0.593692	0.167022	0.226439
I3LUR7-Uncharacterized protein OS=Sus scrofa GN=COL6A3 PE=4 SV=1	12	11.166	9.23961	82.7475	13.834	13.5251	97.767	-1.23893	0.59519	-0.309098	0.225344
I3LEJ8-Uncharacterized protein OS=Sus scrofa GN=LOC100516293 PE=4 SV=1	4	12.884	1.62657	12.6247	12.116	1.81604	14.9887	1.06339	0.605235	0.0886656	0.218076
F1RPS8-ATP synthase subunit alpha (Fragment) OS=Sus scrofa GN=ATP5A1 PE=3 SV=1	8	12.7838	1.87923	14.7001	12.2162	2.41413	19.7617	1.04647	0.631552	0.0655259	0.199591
F1RQQ8-Phosphorylase OS=Sus scrofa GN=PYGM PE=3 SV=2	208	12.6854	8.27059	65.1977	12.3146	8.03118	65.2167	1.03011	0.643776	0.0427995	0.191265
P02540-Desmin OS=Sus scrofa GN=DES PE=1 SV=4	8	12.189	2.75998	22.6433	12.811	3.28304	25.6267	-1.05103	0.707117	-0.0718096	0.150509
F1S4X7-Uncharacterized protein OS=Sus scrofa GN=MYH7B PE=4 SV=2	232	12.3329	10.9081	88.4473	12.6671	9.61817	75.9305	-1.02709	0.727088	-0.0385684	0.138413
D0G7F6-Triosephosphate isomerase OS=Sus scrofa GN=TPI1 PE=2 SV=1	68	12.7389	9.44383	74.1338	12.2611	9.79229	79.8647	1.03897	0.774189	0.0551522	0.111153
F1RFH9-Calcium-transporting ATPase OS=Sus scrofa GN=ATP2A1 PE=3 SV=1	184	12.3678	10.9037	88.1622	12.6322	9.53611	75.4906	-1.02138	0.805131	-0.030514	0.0941337
F1RZU4-N-acylglucosamine 2-epimerase OS=Sus scrofa GN=RENBP PE=4 SV=1	36	12.5757	2.17378	17.2855	12.4243	3.78504	30.4649	1.01219	0.838071	0.0174836	0.0767191
F1SLA0-ATP synthase subunit beta OS=Sus scrofa GN=ATP5B PE=3 SV=1	12	11.873	10.8569	91.4422	13.127	17.2423	131.35	-1.10562	0.840481	-0.144857	0.0754721
F1RNU9-Glucose-6-phosphate isomerase OS=Sus scrofa GN=GPI PE=3 SV=2	24	12.7784	10.441	81.7084	12.2216	9.50692	77.7881	1.04556	0.850831	0.0642822	0.0701569
F1RIS3-Uncharacterized protein OS=Sus scrofa GN=TRIM72 PE=4 SV=2	4	13.0989	10.8072	82.5047	11.9011	7.16814	60.2309	1.10065	0.878916	0.13835	0.0560528
A1XQV5-Fast skeletal muscle troponin C OS=Sus scrofa GN=TNNC2 PE=2 SV=2	4	12.6776	3.60908	28.4682	12.3224	1.53418	12.4503	1.02882	0.88288	0.040988	0.0540985
F1SMN5-Uncharacterized protein OS=Sus scrofa GN=FLNC PE=4 SV=1	56	12.5687	9.32251	74.1727	12.4313	8.19221	65.8997	1.01105	0.934751	0.0158492	0.0293042

## Sheet: Results Summary
Protein	N	Mean A	S.d. A	C.v. A	Mean B	S.d. B	C.v. B	Fold Change A vs B	t-test (A vs B)	t-test Rank (A vs B)	Hochberg and Benjamini Corrected p-value
Q9TV61-Myosin-1 OS=Sus scrofa GN=MYH1 PE=2 SV=1	4532	11.3771	9.43549	82.934	13.6229	9.87361	72.4781	-1.1974	2.69523e-28	1	2.07533e-26			No. t-tests	77
F1SS64-Myosin-1 OS=Sus scrofa GN=MYH1 PE=4 SV=1	3712	11.4543	9.68099	84.5181	13.5457	9.91903	73.2266	-1.18258	4.93752e-20	2	1.90094e-18			Desired significance	0.05
F1SHL9-Pyruvate kinase (Fragment) OS=Sus scrofa GN=PKM PE=3 SV=2	744	14.3431	9.86632	68.788	10.6569	7.21975	67.7471	1.34589	4.74848e-16	3	1.21878e-14			Bonferroni correction	0.000649351
F1RFY2-Beta-enolase OS=Sus scrofa GN=ENO3 PE=3 SV=1	568	14.4357	9.6736	67.0117	10.5643	7.15676	67.7447	1.36646	4.20195e-14	4	8.08875e-13			Desired significance	0.01
P00355-Glyceraldehyde-3-phosphate dehydrogenase OS=Sus scrofa GN=GAPDH PE=1 SV=4	440	14.6606	9.42885	64.3142	10.3394	7.09506	68.6216	1.41794	4.80397e-14	5	7.39811e-13			Bonferroni correction	0.00012987
Q9TV62-Myosin-4 OS=Sus scrofa GN=MYH4 PE=2 SV=1	5492	11.8148	9.5292	80.6547	13.1852	9.5728	72.6027	-1.11599	5.99296e-14	6	7.69097e-13
P00339-L-lactate dehydrogenase A chain OS=Sus scrofa GN=LDHA PE=1 SV=3	196	14.7936	8.83291	59.7076	10.2064	6.20777	60.8224	1.44945	7.14054e-09	7	7.85459e-08
Q5XLD3-Creatine kinase M-type OS=Sus scrofa GN=CKM PE=2 SV=1	408	14.2287	11.6714	82.0272	10.7713	8.32352	77.2752	1.32099	1.39606e-06	8	1.3437e-05
A1XQT6-MLC1f OS=Sus scrofa GN=MYL1 PE=2 SV=1	144	14.4703	9.98927	69.0329	10.5297	6.92031	65.7219	1.37424	0.000134277	9	0.00114881
F1RU49-Uncharacterized protein OS=Sus scrofa GN=LOC100519531 PE=4 SV=1	408	13.5198	9.33307	69.0327	11.4802	7.73617	67.387	1.17766	0.000722589	10	0.00556393
A4Z6H0-Adenylosuccinate synthetase isozyme 1 OS=Sus scrofa GN=ADSSL1 PE=2 SV=1	20	14.9072	5.01157	33.6184	10.0928	2.58207	25.5834	1.47702	0.000864794	11	0.00605355
F1RUN2-Serum albumin OS=Sus scrofa GN=ALB PE=4 SV=1	176	14.2063	10.1038	71.1218	10.7937	9.3473	86.5993	1.31616	0.00114404	12	0.00734093
K7GMH0-Uncharacterized protein (Fragment) OS=Sus scrofa GN=MYH6 PE=4 SV=1	1752	12.0529	9.13753	75.8117	12.9471	8.46897	65.4123	-1.07418	0.00269119	13	0.0159401
F1RJW7-Calsequestrin OS=Sus scrofa GN=CASQ1 PE=2 SV=2	44	14.1476	5.50886	38.9386	10.8524	4.40946	40.6311	1.30363	0.00297054	14	0.016338
B5KJG2-Phosphoglycerate mutase 2 OS=Sus scrofa GN=PGAM2 PE=2 SV=1	64	14.9432	10.7851	72.174	10.0568	7.2534	72.1245	1.48589	0.00350292	15	0.0179816
F1S9D6-Myosin-7 OS=Sus scrofa GN=MYH7 PE=4 SV=1	1812	12.0964	8.90349	73.6045	12.9036	8.30624	64.3714	-1.06673	0.00481119	16	0.0231539
P68137-Actin, alpha skeletal muscle OS=Sus scrofa GN=ACTA1 PE=3 SV=1	1204	12.0198	8.53652	71.0203	12.9802	9.22837	71.0959	-1.0799	0.0081113	17	0.0367394
F1SRS2-Uncharacterized protein OS=Sus scrofa GN=LOC100302368 PE=3 SV=1	20	16.0646	9.83547	61.2243	8.93535	4.66462	52.2041	1.79787	0.00815463	18	0.0348837
F1SS66-Uncharacterized protein OS=Sus scrofa GN=MYH13 PE=4 SV=2	1176	12.0472	9.6813	80.3615	12.9528	8.84408	68.2792	-1.07517	0.0179925	19	0.0729172
Q2HYU2-ATP-dependent 6-phosphofructokinase, muscle type OS=Sus scrofa GN=PFKM PE=2 SV=1	96	13.9519	8.89106	63.7266	11.0481	8.26833	74.8393	1.26283	0.0208048	20	0.0800983
F1S9Q1-Uncharacterized protein OS=Sus scrofa PE=3 SV=2	8	14.5634	2.97511	20.4287	10.4366	2.97113	28.4685	1.39542	0.021108	21	0.0773958
F1S814-Uncharacterized protein OS=Sus scrofa GN=PGM1 PE=3 SV=2	136	13.7251	9.45985	68.924	11.2749	8.44036	74.8594	1.21731	0.0255582	22	0.0894538
F1SGI7-Uncharacterized protein (Fragment) OS=Sus scrofa GN=KRT75 PE=3 SV=2	16	14.5443	3.69832	25.428	10.4557	5.83511	55.8077	1.39103	0.0304579	23	0.101968
F2Z5B6-Tropomyosin alpha-1 chain OS=Sus scrofa GN=TPM1 PE=3 SV=1	28	14.4599	7.78457	53.8355	10.5401	4.87903	46.2902	1.37189	0.031676	24	0.101627
F1RH19-Uncharacterized protein OS=Sus scrofa GN=MYBPC2 PE=4 SV=2	276	13.2587	9.11146	68.7207	11.7413	7.3684	62.7561	1.12923	0.0322248	25	0.0992524
F1RM74-Glyceraldehyde-3-phosphate dehydrogenase OS=Sus scrofa GN=GAPDHS PE=3 SV=1	28	15.5481	12.2396	78.721	9.45189	7.66643	81.11	1.64497	0.0334499	26	0.0990631
I3LKC9-Uncharacterized protein OS=Sus scrofa PE=3 SV=1	12	3.61308	9.46897	262.074	21.3869	23.2671	108.791	-5.9193	0.033564	27	0.0957196
F1S317-Uncharacterized protein OS=Sus scrofa GN=AKAP9 PE=4 SV=1	4	15.1152	2.0475	13.546	9.88483	2.73783	27.6973	1.52913	0.0409559	28	0.112629
F1RII7-Hemoglobin subunit beta OS=Sus scrofa GN=HBB PE=3 SV=1	4	13.9795	0.653597	4.6754	11.0205	1.69599	15.3894	1.2685	0.0496692	29	0.13188
Q5XLD2-Myosin regulatory light chain 2 OS=Sus scrofa GN=HUMMLC2B PE=2 SV=1	72	13.6982	7.91765	57.8006	11.3018	6.84212	60.5402	1.21204	0.055684	30	0.142922
F1S7C4-Uncharacterized protein (Fragment) OS=Sus scrofa GN=ATP13A1 PE=3 SV=1	8	13.816	3.25371	23.5504	11.184	3.0656	27.4105	1.23533	0.1417	31	0.351965
F1RHL9-Uncharacterized protein OS=Sus scrofa GN=ACTN2 PE=4 SV=1	32	11.0251	7.21862	65.4745	13.9749	8.34653	59.7251	-1.26756	0.141837	32	0.341295
F1SR85-Uncharacterized protein OS=Sus scrofa GN=ABCB6 PE=3 SV=1	12	15.3982	11.3655	73.8101	9.60177	5.84951	60.9212	1.60369	0.151545	33	0.353604
F1SGG3-Uncharacterized protein OS=Sus scrofa GN=KRT1 PE=3 SV=1	12	15.2744	10.7294	70.2443	9.72556	6.00911	61.7868	1.57055	0.152557	34	0.345496
F1SHX0-Uncharacterized protein (Fragment) OS=Sus scrofa GN=NEB PE=4 SV=2	12	13.3335	2.94003	22.0499	11.6665	2.35359	20.1739	1.14289	0.15691	35	0.345201
I3LP41-Malate dehydrogenase OS=Sus scrofa GN=MDH2 PE=3 SV=1	4	14.7883	4.27107	28.8814	10.2117	1.36677	13.3844	1.44818	0.15959	36	0.341346
Q5S1S4-Carbonic anhydrase 3 OS=Sus scrofa GN=CA3 PE=2 SV=3	88	13.2714	7.18399	54.1316	11.7286	7.62803	65.0375	1.13153	0.17145	37	0.356802
F1SM75-Uncharacterized protein OS=Sus scrofa GN=MYOM1 PE=4 SV=2	32	13.495	6.37479	47.2383	11.505	5.18591	45.0751	1.17296	0.182696	38	0.3702
P00571-Adenylate kinase isoenzyme 1 OS=Sus scrofa GN=AK1 PE=1 SV=1	40	13.1702	4.2835	32.5242	11.8298	4.53274	38.3163	1.11331	0.183422	39	0.36214
I3LAR4-Uncharacterized protein OS=Sus scrofa GN=LOC100736851 PE=4 SV=1	16	10.1165	6.32703	62.5416	14.8835	12.3518	82.9903	-1.47121	0.196816	40	0.37887
F1RPH0-Phosphoglycerate kinase (Fragment) OS=Sus scrofa GN=PGK1 PE=3 SV=2	132	13.2413	9.81442	74.1196	11.7587	10.1848	86.6148	1.12609	0.231309	41	0.43441
F1SHW9-Uncharacterized protein (Fragment) OS=Sus scrofa PE=4 SV=2	52	11.6865	5.46733	46.7833	13.3135	9.01805	67.7362	-1.13922	0.273712	42	0.501806
F1SS61-Uncharacterized protein OS=Sus scrofa GN=MYH3 PE=4 SV=1	1260	12.3125	8.98991	73.0143	12.6875	8.17781	64.4558	-1.03045	0.273745	43	0.490194
I3LIE7-Uncharacterized protein OS=Sus scrofa GN=MYBPH PE=4 SV=1	4	13.2126	0.860827	6.51518	11.7874	1.81188	15.3713	1.12091	0.281652	44	0.492891
F1S5T8-Olfactory receptor (Fragment) OS=Sus scrofa GN=LOC100738138 PE=3 SV=2	8	10.0405	3.19422	31.8133	14.9595	11.0569	73.9123	-1.48991	0.290279	45	0.4967
F1SI85-Phosphoinositide phospholipase C (Fragment) OS=Sus scrofa GN=PLCL1 PE=4 SV=2	8	10.0405	3.19422	31.8133	14.9595	11.0569	73.9123	-1.48991	0.290279	46	0.485903
F1RJJ3-Uncharacterized protein OS=Sus scrofa GN=SBDS PE=4 SV=1	12	14.1458	8.59714	60.7753	10.8542	6.0143	55.4098	1.30325	0.310721	47	0.509054
F1SN25-Uncharacterized protein (Fragment) OS=Sus scrofa GN=TRIM69 PE=4 SV=1	12	14.1458	8.59714	60.7753	10.8542	6.0143	55.4098	1.30325	0.310721	48	0.498449
I3LEQ0-Oxysterol-binding protein OS=Sus scrofa GN=OSBPL9 PE=3 SV=1	12	14.1458	8.59714	60.7753	10.8542	6.0143	55.4098	1.30325	0.310721	49	0.488276
F1RJ25-Uncharacterized protein OS=Sus scrofa GN=ALDOC PE=3 SV=2	64	13.5216	13.2682	98.1258	11.4784	10.3674	90.3207	1.178	0.337443	50	0.519662
F1S6H1-Uncharacterized protein OS=Sus scrofa GN=LOC100737111 PE=3 SV=1	4	16.5656	6.77277	40.8845	8.43438	11.4409	135.646	1.96406	0.339123	51	0.512009
Q0PY11-Elongation factor 1-alpha OS=Sus scrofa GN=EEF1A PE=2 SV=1	4	20.278	22.8924	112.893	4.72196	10.1472	214.894	4.29441	0.340653	52	0.504429
I3LHN1-L-lactate dehydrogenase OS=Sus scrofa GN=LDHAL6A PE=3 SV=1	8	16.6117	18.812	113.245	8.38829	12.3125	146.782	1.98035	0.352184	53	0.511663
F1S587-Uncharacterized protein OS=Sus scrofa GN=AP1M2 PE=4 SV=2	4	13.0104	0.939079	7.21791	11.9896	1.47343	12.2892	1.08514	0.357219	54	0.509368
F1RSW2-Uncharacterized protein OS=Sus scrofa GN=FLT3 PE=3 SV=3	4	13.8934	3.80908	27.4166	11.1066	2.95234	26.5818	1.25091	0.357514	55	0.50052
F1RVL5-Uncharacterized protein (Fragment) OS=Sus scrofa GN=MYOM2 PE=4 SV=2	64	13.0728	9.55624	73.1004	11.9272	7.8339	65.6808	1.09604	0.463261	56	0.636984
F1SIH8-Uncharacterized protein OS=Sus scrofa GN=LOC100516776 PE=3 SV=2	4	6.56452	15.8655	241.686	18.4355	20.8193	112.931	-2.80835	0.46405	57	0.626874
F1RK48-Uncharacterized protein (Fragment) OS=Sus scrofa GN=SRL PE=4 SV=2	20	12.0065	3.77248	31.4202	12.9935	4.53698	34.9174	-1.0822	0.470583	58	0.62474
F1S557-Uncharacterized protein OS=Sus scrofa GN=AGL PE=4 SV=1	8	10.7569	8.41281	78.2082	14.2431	10.1336	71.148	-1.32408	0.495598	59	0.646798
F1RIC4-Uncharacterized protein OS=Sus scrofa GN=MS4A7 PE=4 SV=2	8	11.8588	1.74116	14.6824	13.1412	5.51591	41.9741	-1.10814	0.572923	60	0.735251
F1SNC1-Sperm flagellar protein 2 (Fragment) OS=Sus scrofa GN=SPEF2 PE=4 SV=2	8	11.8588	1.74116	14.6824	13.1412	5.51591	41.9741	-1.10814	0.572923	61	0.723198
F1SPW2-Uncharacterized protein OS=Sus scrofa GN=MAGEB5 PE=4 SV=2	8	11.8588	1.74116	14.6824	13.1412	5.51591	41.9741	-1.10814	0.572923	62	0.711533
F1SRI8-Uncharacterized protein (Fragment) OS=Sus scrofa GN=MYBPC1 PE=4 SV=2	24	13.2228	11.9262	90.1946	11.7772	4.80264	40.779	1.12274	0.593692	63	0.725624
I3LUR7-Uncharacterized protein OS=Sus scrofa GN=COL6A3 PE=4 SV=1	12	11.166	9.23961	82.7475	13.834	13.5251	97.767	-1.23893	0.59519	64	0.716088
I3LEJ8-Uncharacterized protein OS=Sus scrofa GN=LOC100516293 PE=4 SV=1	4	12.884	1.62657	12.6247	12.116	1.81604	14.9887	1.06339	0.605235	65	0.716971
F1RPS8-ATP synthase subunit alpha (Fragment) OS=Sus scrofa GN=ATP5A1 PE=3 SV=1	8	12.7838	1.87923	14.7001	12.2162	2.41413	19.7617	1.04647	0.631552	66	0.73681
F1RQQ8-Phosphorylase OS=Sus scrofa GN=PYGM PE=3 SV=2	208	12.6854	8.27059	65.1977	12.3146	8.03118	65.2167	1.03011	0.643776	67	0.739862
P02540-Desmin OS=Sus scrofa GN=DES PE=1 SV=4	8	12.189	2.75998	22.6433	12.811	3.28304	25.6267	-1.05103	0.707117	68	0.800706
F1S4X7-Uncharacterized protein OS=Sus scrofa GN=MYH7B PE=4 SV=2	232	12.3329	10.9081	88.4473	12.6671	9.61817	75.9305	-1.02709	0.727088	69	0.811388
D0G7F6-Triosephosphate isomerase OS=Sus scrofa GN=TPI1 PE=2 SV=1	68	12.7389	9.44383	74.1338	12.2611	9.79229	79.8647	1.03897	0.774189	70	0.851608
F1RFH9-Calcium-transporting ATPase OS=Sus scrofa GN=ATP2A1 PE=3 SV=1	184	12.3678	10.9037	88.1622	12.6322	9.53611	75.4906	-1.02138	0.805131	71	0.87317
F1RZU4-N-acylglucosamine 2-epimerase OS=Sus scrofa GN=RENBP PE=4 SV=1	36	12.5757	2.17378	17.2855	12.4243	3.78504	30.4649	1.01219	0.838071	72	0.89627
F1SLA0-ATP synthase subunit beta OS=Sus scrofa GN=ATP5B PE=3 SV=1	12	11.873	10.8569	91.4422	13.127	17.2423	131.35	-1.10562	0.840481	73	0.886535
F1RNU9-Glucose-6-phosphate isomerase OS=Sus scrofa GN=GPI PE=3 SV=2	24	12.7784	10.441	81.7084	12.2216	9.50692	77.7881	1.04556	0.850831	74	0.885324
F1RIS3-Uncharacterized protein OS=Sus scrofa GN=TRIM72 PE=4 SV=2	4	13.0989	10.8072	82.5047	11.9011	7.16814	60.2309	1.10065	0.878916	75	0.902353
A1XQV5-Fast skeletal muscle troponin C OS=Sus scrofa GN=TNNC2 PE=2 SV=2	4	12.6776	3.60908	28.4682	12.3224	1.53418	12.4503	1.02882	0.88288	76	0.894496
F1SMN5-Uncharacterized protein OS=Sus scrofa GN=FLNC PE=4 SV=1	56	12.5687	9.32251	74.1727	12.4313	8.19221	65.8997	1.01105	0.934751	77	0.934751

## Sheet: Exported data
Header	--------------------------------------------------------
Search title	Submitted from B853 Pires iTRAQ Sample 2 All Runs AvB by Mascot Daemon on BIOLPC2826
Timestamp	2014-10-29T14:46:49Z
User
Email
Report URI	http://biolmascot.york.ac.uk/mascot/cgi/master_results.pl?file=../data/20141029/F127321.dat
Peak list data path	C:\Program Files (x86)\Matrix Science\Mascot Daemon\mgf\29 B853 Pires iTRAQ Sample 2 All Runs AvB\mascot_daemon_merge.mgf
Peak list format	Mascot generic
Search type	MIS
Mascot version	2.4.1
Database	UniProt_pig
Fasta file	UniProt_pig_20141001.fasta
Total sequences	26142
Total residues	11820078
Sequences after taxonomy filter	26142
Number of queries	122809
Decoy	--------------------------------------------------------
Number of matches above identity threshold in search of real database	2568
Number of matches above identity threshold in search of decoy database	12
Number of matches above homology threshold in search of real database	3235
Number of matches above homology threshold in search of decoy database	15
Fixed modifications	--------------------------------------------------------
Identifier	Name	Delta	Neutral loss
1	Carbamidomethyl (C)	57.0215
2	iTRAQ8plex (N-term)	304.205
3	iTRAQ8plex (K)	304.205
Variable modifications	--------------------------------------------------------
Identifier	Name	Delta	Neutral loss(es)
1	iTRAQ8plex (Y)	304.205
2	Oxidation (M)	15.9949	0	63.9983
Search Parameters	--------------------------------------------------------
Taxonomy filter	All entries
Enzyme	Trypsin
Maximum Missed Cleavages	1
Fixed modifications	Carbamidomethyl (C),iTRAQ8plex (N-term),iTRAQ8plex (K)
Quantitation method	iTRAQ 8plex B853
Variable modifications	iTRAQ8plex (Y),Oxidation (M)
Peptide Mass Tolerance	10
Peptide Mass Tolerance Units	ppm
Fragment Mass Tolerance	0.05
Fragment Mass Tolerance Units	Da
Mass values	Monoisotopic
Instrument type	Default
Decoy database also searched	1
Format parameters	--------------------------------------------------------
Significance threshold	0.05
Max. number of hits	0
Use MudPIT protein scoring	1
Ions score cut-off	0.05
Include same-set proteins	0
Include sub-set proteins	0
Include unassigned	0
Require bold red	0
Use homology threshold	1
Group protein families	0
Re-score using Percolator	0
Protein hits	--------------------------------------------------------
prot_hit_num	prot_acc	prot_desc	prot_score	prot_mass	prot_matches	prot_matches_sig	prot_sequences	prot_sequences_sig	pep_query	pep_rank	pep_isbold	pep_isunique	pep_exp_mz	pep_exp_mr	pep_exp_z	pep_calc_mr	pep_delta	pep_miss	pep_score	pep_expect	pep_res_before	pep_seq	pep_res_after	pep_var_mod	pep_var_mod_pos	pep_summed_mod_pos	pep_scan_title
1	Q9TV62	Myosin-4 OS=Sus scrofa GN=MYH4 PE=2 SV=1	30936	287893	1373	1373	114	114	87364	1	1	1	546.817	1091.62	2	1091.62	-0.0041	0	17.06	0.025	R	QATEAIR	N				Cmpd 4394, AutoMSn(546.8173), 49.5 min (13229323981848142)	13A/AvB	0.22	16A/AvB	0.334	27A/AvB	0.226	29A/AvB	0.225	10B/AvB	0.223	21B/AvB	0.443	25B/AvB	0.129	37B/AvB	0.205	113	44275.2	114	43785.6	115	66428.1
1	Q9TV62	Myosin-4 OS=Sus scrofa GN=MYH4 PE=2 SV=1	30936	287893	1373	1373	114	114	87365	1	1	1	546.817	1091.62	2	1091.62	-0.0039	0	26.2	0.01	R	QATEAIR	N				Cmpd 4467, AutoMSn(546.8174), 50.3 min (13229323981848288)	13A/AvB	0.244	16A/AvB	0.32	27A/AvB	0.255	29A/AvB	0.217	10B/AvB	0.211	21B/AvB	0.39	25B/AvB	0.164	37B/AvB	0.235	113	58801.1	114	68233.1	115	89246.9
1	Q9TV62	Myosin-4 OS=Sus scrofa GN=MYH4 PE=2 SV=1	30936	287893	1373	1373	114	114	87366	1	1	1	546.817	1091.62	2	1091.62	-0.0037	0	26.61	0.0054	R	QATEAIR	N				Cmpd 5228, AutoMSn(546.8175), 58.6 min (13229323981703859)	13A/AvB	0.202	16A/AvB	0.322	27A/AvB	0.245	29A/AvB	0.187	10B/AvB	0.219	21B/AvB	0.373	25B/AvB	0.171	37B/AvB	0.238	113	25538.8	114	23627.7	115	37585.5
1	Q9TV62	Myosin-4 OS=Sus scrofa GN=MYH4 PE=2 SV=1	30936	287893	1373	1373	114	114	88477	1	1	0	559.861	1117.71	2	1117.71	-0.0052	0	18.03	0.037	K	LAQLITR	T				Cmpd 13931, AutoMSn(559.8610), 154.5 min (13229323981818555)	13A/AvB	0.234	16A/AvB	0.305	27A/AvB	0.292	29A/AvB	0.246	10B/AvB	0.392	21B/AvB	0.335	25B/AvB	0.094	37B/AvB	0.18	113	48842.8	114	29117.9	115	38034.3
1	Q9TV62	Myosin-4 OS=Sus scrofa GN=MYH4 PE=2 SV=1	30936	287893	1373	1373	114	114	88479	1	1	0	559.861	1117.71	2	1117.71	-0.0043	0	23.02	0.012	K	LAQLITR	T				Cmpd 13973, AutoMSn(559.8614), 157.7 min (13229323981770438)	13A/AvB	-0.077	16A/AvB	1.182	27A/AvB	0.709	29A/AvB	-0.015	10B/AvB	0.876	21B/AvB	-0.041	25B/AvB	-0.035	37B/AvB	0.201	113	29359.8	114	-2595.99	115	39648
1	Q9TV62	Myosin-4 OS=Sus scrofa GN=MYH4 PE=2 SV=1	30936	287893	1373	1373	114	114	88486	1	1	0	559.862	1117.71	2	1117.71	-0.0037	0	17.31	0.044	K	LAQLITR	T				Cmpd 13680, AutoMSn(559.8617), 152.7 min (13229323981866714)	13A/AvB	0.304	16A/AvB	0.279	27A/AvB	0.275	29A/AvB	0.259	10B/AvB	0.355	21B/AvB	0.343	25B/AvB	0.146	37B/AvB	0.156	113	38816.4	114	33325	115	30495.4
1	Q9TV62	Myosin-4 OS=Sus scrofa GN=MYH4 PE=2 SV=1	30936	287893	1373	1373	114	114	88487	1	1	0	559.862	1117.71	2	1117.71	-0.0037	0	17.29	0.044	K	LAQLITR	T				Cmpd 14004, AutoMSn(559.8617), 155.4 min (13229323981818701)	13A/AvB	0.228	16A/AvB	0.301	27A/AvB	0.234	29A/AvB	0.253	10B/AvB	0.398	21B/AvB	0.339	25B/AvB	0.121	37B/AvB	0.143	113	62262	114	35669.9	115	47188.5
1	Q9TV62	Myosin-4 OS=Sus scrofa GN=MYH4 PE=2 SV=1	30936	287893	1373	1373	114	114	88489	1	1	0	559.862	1117.71	2	1117.71	-0.0032	0	23.29	0.011	K	LAQLITR	T				Cmpd 14163, AutoMSn(559.8619), 158.2 min (13229323981556942)	13A/AvB	0.269	16A/AvB	0.294	27A/AvB	0.246	29A/AvB	0.211	10B/AvB	0.416	21B/AvB	0.323	25B/AvB	0.098	37B/AvB	0.162	113	42472.7	114	27408	115	30009.9
1	Q9TV62	Myosin-4 OS=Sus scrofa GN=MYH4 PE=2 SV=1	30936	287893	1373	1373	114	114	89363	1	1	0	379.22	1134.64	3	1134.64	-0.0037	1	18.84	0.022	R	SRNDALR	I				Cmpd 2847, AutoMSn(379.2198), 32.9 min (13229323981845048)	13A/AvB	0.142	16A/AvB	0.417	27A/AvB	0.231	29A/AvB	0.143	10B/AvB	0.257	21B/AvB	0.412	25B/AvB	0.145	37B/AvB	0.186	113	12686.9	114	6990.84	115	20552.9
1	Q9TV62	Myosin-4 OS=Sus scrofa GN=MYH4 PE=2 SV=1	30936	287893	1373	1373	114	114	93746	1	1	0	411.548	1231.62	3	1231.63	-0.006	0	18.52	0.041	R	HDCDLLR	E				Cmpd 6385, AutoMSn(411.5482), 70.3 min (13229323981803463)	13A/AvB	0.236	16A/AvB	0.478	27A/AvB	0.357	29A/AvB	0.205	10B/AvB	0.323	21B/AvB	0.379	25B/AvB	0.139	37B/AvB	0.159	113	22936.2	114	16722.6	115	33919.3
1	Q9TV62	Myosin-4 OS=Sus scrofa GN=MYH4 PE=2 SV=1	30936	287893	1373	1373	114	114	93866	1	1	0	619.335	1236.66	2	1236.66	-0.0062	0	17.09	0.025	R	ASLEQTER	S				Cmpd 5104, AutoMSn(619.3350), 56.2 min (13229323981800901)	13A/AvB	0.234	16A/AvB	0.3	27A/AvB	0.225	29A/AvB	0.175	10B/AvB	0.233	21B/AvB	0.352	25B/AvB	0.147	37B/AvB	0.268	113	49714.4	114	49809.2	115	64049.6
1	Q9TV62	Myosin-4 OS=Sus scrofa GN=MYH4 PE=2 SV=1	30936	287893	1373	1373	114	114	93867	1	1	0	619.335	1236.66	2	1236.66	-0.006	0	18.83	0.017	R	ASLEQTER	S				Cmpd 5552, AutoMSn(619.3351), 62.2 min (13229323981704507)	13A/AvB	0.297	16A/AvB	0.292	27A/AvB	0.188	29A/AvB	0.226	10B/AvB	0.223	21B/AvB	0.333	25B/AvB	0.179	37B/AvB	0.265	113	15084.7	114	20084.8	115	19778.4
1	Q9TV62	Myosin-4 OS=Sus scrofa GN=MYH4 PE=2 SV=1	30936	287893	1373	1373	114	114	93868	1	1	0	619.335	1236.66	2	1236.66	-0.006	0	18.57	0.018	R	ASLEQTER	S				Cmpd 5480, AutoMSn(619.3351), 61.4 min (13229323981704363)	13A/AvB	0.258	16A/AvB	0.355	27A/AvB	0.181	29A/AvB	0.247	10B/AvB	0.186	21B/AvB	0.378	25B/AvB	0.187	37B/AvB	0.248	113	13868.4	114	19189.8	115	26485.5
1	Q9TV62	Myosin-4 OS=Sus scrofa GN=MYH4 PE=2 SV=1	30936	287893	1373	1373	114	114	93870	1	1	0	619.335	1236.66	2	1236.66	-0.0053	0	21.36	0.0099	R	ASLEQTER	S				Cmpd 5355, AutoMSn(619.3354), 59.2 min (13229323981539326)	13A/AvB	0.186	16A/AvB	0.276	27A/AvB	0.187	29A/AvB	0.202	10B/AvB	0.192	21B/AvB	0.352	25B/AvB	0.168	37B/AvB	0.288	113	37683.1	114	36566.1	115	54106.1
1	Q9TV62	Myosin-4 OS=Sus scrofa GN=MYH4 PE=2 SV=1	30936	287893	1373	1373	114	114	93871	1	1	0	619.336	1236.66	2	1236.66	-0.0049	0	22.43	0.0079	R	ASLEQTER	S				Cmpd 5176, AutoMSn(619.3356), 57.0 min (13229323981801045)	13A/AvB	0.231	16A/AvB	0.28	27A/AvB	0.212	29A/AvB	0.233	10B/AvB	0.181	21B/AvB	0.335	25B/AvB	0.176	37B/AvB	0.308	113	86552.8	114	110469	115	133846
1	Q9TV62	Myosin-4 OS=Sus scrofa GN=MYH4 PE=2 SV=1	30936	287893	1373	1373	114	114	93872	1	1	0	619.336	1236.66	2	1236.66	-0.0049	0	31.76	0.0018	R	ASLEQTER	S				Cmpd 5454, AutoMSn(619.3356), 61.1 min (13229323981753400)	13A/AvB	0.556	16A/AvB	1.84	27A/AvB	0.453	29A/AvB	0.569	10B/AvB	0.391	21B/AvB	0.038	25B/AvB	-0.027	37B/AvB	0.598	113	15105.2	114	21466.2	115	71046.9
1	Q9TV62	Myosin-4 OS=Sus scrofa GN=MYH4 PE=2 SV=1	30936	287893	1373	1373	114	114	93873	1	1	0	619.336	1236.66	2	1236.66	-0.0048	0	16.48	0.028	R	ASLEQTER	S				Cmpd 5525, AutoMSn(619.3357), 61.9 min (13229323981753542)	13A/AvB	-0.086	16A/AvB	1.881	27A/AvB	0	29A/AvB	-0.001	10B/AvB	0.642	21B/AvB	-0.039	25B/AvB	0	37B/AvB	0.397	113	24387.4	114	-3251.18	115	71452.7
1	Q9TV62	Myosin-4 OS=Sus scrofa GN=MYH4 PE=2 SV=1	30936	287893	1373	1373	114	114	93875	1	1	0	619.336	1236.66	2	1236.66	-0.0048	0	28.1	0.0023	R	ASLEQTER	S				Cmpd 4792, AutoMSn(619.3357), 53.9 min (13229323981848938)	13A/AvB	0.201	16A/AvB	0.258	27A/AvB	0.207	29A/AvB	0.246	10B/AvB	0.2	21B/AvB	0.333	25B/AvB	0.175	37B/AvB	0.291	113	95915.2	114	96125.3	115	123668
1	Q9TV62	Myosin-4 OS=Sus scrofa GN=MYH4 PE=2 SV=1	30936	287893	1373	1373	114	114	93876	1	1	0	619.336	1236.66	2	1236.66	-0.0046	0	29.69	0.0016	R	ASLEQTER	S				Cmpd 4720, AutoMSn(619.3358), 53.1 min (13229323981848794)	13A/AvB	0.214	16A/AvB	0.266	27A/AvB	0.227	29A/AvB	0.211	10B/AvB	0.228	21B/AvB	0.322	25B/AvB	0.17	37B/AvB	0.28	113	77121.3	114	72277.9	115	89783.8
1	Q9TV62	Myosin-4 OS=Sus scrofa GN=MYH4 PE=2 SV=1	30936	287893	1373	1373	114	114	93879	1	1	0	619.336	1236.66	2	1236.66	-0.0037	0	24.43	0.0051	R	ASLEQTER	S				Cmpd 5427, AutoMSn(619.3363), 60.0 min (13229323981539470)	13A/AvB	0.23	16A/AvB	0.266	27A/AvB	0.214	29A/AvB	0.213	10B/AvB	0.196	21B/AvB	0.345	25B/AvB	0.172	37B/AvB	0.287	113	39543.4	114	46387.7	115	53449.6
1	Q9TV62	Myosin-4 OS=Sus scrofa GN=MYH4 PE=2 SV=1	30936	287893	1373	1373	114	114	95139	1	1	1	423.263	1266.77	3	1266.78	-0.0089	0	23.88	0.045	R	NVEAVK	G				Cmpd 6119, AutoMSn(423.2629), 68.4 min (13229323981851592)	13A/AvB	0.177	16A/AvB	0.318	27A/AvB	0.231	29A/AvB	0.228	10B/AvB	0.264	21B/AvB	0.303	25B/AvB	0.212	37B/AvB	0.221	113	95131.3	114	63991.5	115	114649
1	Q9TV62	Myosin-4 OS=Sus scrofa GN=MYH4 PE=2 SV=1	30936	287893	1373	1373	114	114	95141	1	1	1	423.263	1266.77	3	1266.78	-0.0088	0	28.83	0.014	R	NVEAVK	G				Cmpd 6713, AutoMSn(423.2629), 75.3 min (13229323981755918)	13A/AvB	0.7	16A/AvB	1.925	27A/AvB	1.487	29A/AvB	-0.032	10B/AvB	0.551	21B/AvB	-0.002	25B/AvB	-0.05	37B/AvB	0.501	113	11015.9	114	13995.6	115	38461.9
1	Q9TV62	Myosin-4 OS=Sus scrofa GN=MYH4 PE=2 SV=1	30936	287893	1373	1373	114	114	95142	1	1	1	423.263	1266.77	3	1266.78	-0.0087	0	27.06	0.022	R	NVEAVK	G				Cmpd 6450, AutoMSn(423.2629), 71.0 min (13229323981803593)	13A/AvB	0.26	16A/AvB	0.331	27A/AvB	0.282	29A/AvB	0.209	10B/AvB	0.282	21B/AvB	0.37	25B/AvB	0.156	37B/AvB	0.191	113	41670.6	114	38351.9	115	48916.7
1	Q9TV62	Myosin-4 OS=Sus scrofa GN=MYH4 PE=2 SV=1	30936	287893	1373	1373	114	114	95145	1	1	1	423.263	1266.77	3	1266.78	-0.0077	0	27.77	0.016	R	NVEAVK	G				Cmpd 6740, AutoMSn(423.2633), 75.6 min (13229323981706883)	13A/AvB	0.151	16A/AvB	0.309	27A/AvB	0.263	29A/AvB	0.221	10B/AvB	0.23	21B/AvB	0.34	25B/AvB	0.164	37B/AvB	0.266	113	13146.4	114	8610.73	115	17671.8
1	Q9TV62	Myosin-4 OS=Sus scrofa GN=MYH4 PE=2 SV=1	30936	287893	1373	1373	114	114	96866	1	1	0	653.883	1305.75	2	1305.76	-0.0051	0	18.15	0.02	K	EALVSQLSR	G				Cmpd 12431, AutoMSn(653.8827), 140.1 min (13229323981767354)	13A/AvB	-0.036	16A/AvB	0.88	27A/AvB	0.722	29A/AvB	0.001	10B/AvB	0.677	21B/AvB	0.053	25B/AvB	-0.04	37B/AvB	0.31	113	16384.5	114	-880.628	115	21281.5
1	Q9TV62	Myosin-4 OS=Sus scrofa GN=MYH4 PE=2 SV=1	30936	287893	1373	1373	114	114	96867	1	1	0	653.883	1305.75	2	1305.76	-0.0048	0	16.09	0.031	K	EALVSQLSR	G				Cmpd 12407, AutoMSn(653.8828), 137.5 min (13229323981815507)	13A/AvB	0.247	16A/AvB	0.253	27A/AvB	0.206	29A/AvB	0.276	10B/AvB	0.233	21B/AvB	0.296	25B/AvB	0.208	37B/AvB	0.263	113	30095.4	114	31959	115	32690.4
1	Q9TV62	Myosin-4 OS=Sus scrofa GN=MYH4 PE=2 SV=1	30936	287893	1373	1373	114	114	96869	1	1	0	653.883	1305.75	2	1305.76	-0.0046	0	16.75	0.027	K	EALVSQLSR	G				Cmpd 12550, AutoMSn(653.8829), 139.1 min (13229323981815793)	13A/AvB	0.246	16A/AvB	0.265	27A/AvB	0.216	29A/AvB	0.213	10B/AvB	0.227	21B/AvB	0.265	25B/AvB	0.21	37B/AvB	0.297	113	20503.5	114	22169.4	115	23922.1
1	Q9TV62	Myosin-4 OS=Sus scrofa GN=MYH4 PE=2 SV=1	30936	287893	1373	1373	114	114	96871	1	1	0	653.883	1305.75	2	1305.76	-0.0043	0	18.37	0.019	K	EALVSQLSR	G				Cmpd 12530, AutoMSn(653.8831), 139.8 min (13229323981553676)	13A/AvB	0.251	16A/AvB	0.234	27A/AvB	0.194	29A/AvB	0.225	10B/AvB	0.194	21B/AvB	0.353	25B/AvB	0.164	37B/AvB	0.289	113	10305.7	114	13308.5	115	12394.1
1	Q9TV62	Myosin-4 OS=Sus scrofa GN=MYH4 PE=2 SV=1	30936	287893	1373	1373	114	114	96873	1	1	0	653.883	1305.75	2	1305.76	-0.0043	0	13.97	0.049	K	EALVSQLSR	G				Cmpd 12478, AutoMSn(653.8831), 138.3 min (13229323981815649)	13A/AvB	0.236	16A/AvB	0.226	27A/AvB	0.245	29A/AvB	0.277	10B/AvB	0.238	21B/AvB	0.295	25B/AvB	0.196	37B/AvB	0.271	113	42109.2	114	41823.9	115	40025.4
1	Q9TV62	Myosin-4 OS=Sus scrofa GN=MYH4 PE=2 SV=1	30936	287893	1373	1373	114	114	96876	1	1	0	653.883	1305.75	2	1305.76	-0.0042	0	19.96	0.025	K	EALVSQLSR	G				Cmpd 12464, AutoMSn(653.8831), 140.7 min (13229323981718331)	13A/AvB	0.252	16A/AvB	0.189	27A/AvB	0.186	29A/AvB	0.212	10B/AvB	0.239	21B/AvB	0.29	25B/AvB	0.146	37B/AvB	0.325	113	5991.83	114	6318.04	115	4754.58
1	Q9TV62	Myosin-4 OS=Sus scrofa GN=MYH4 PE=2 SV=1	30936	287893	1373	1373	114	114	96877	1	1	0	653.883	1305.75	2	1305.76	-0.0042	0	15.59	0.038	K	EALVSQLSR	G				Cmpd 12221, AutoMSn(653.8831), 136.2 min (13229323981863796)	13A/AvB	0.178	16A/AvB	0.23	27A/AvB	0.217	29A/AvB	0.271	10B/AvB	0.218	21B/AvB	0.32	25B/AvB	0.219	37B/AvB	0.243	113	19511.2	114	15956.4	115	20546.1
1	Q9TV62	Myosin-4 OS=Sus scrofa GN=MYH4 PE=2 SV=1	30936	287893	1373	1373	114	114	96880	1	1	0	653.883	1305.75	2	1305.76	-0.004	0	32.8	0.0014	K	EALVSQLSR	G				Cmpd 12503, AutoMSn(653.8832), 141.0 min (13229323981767498)	13A/AvB	0.44	16A/AvB	0.004	27A/AvB	0.257	29A/AvB	0.324	10B/AvB	0.243	21B/AvB	0.509	25B/AvB	-0.035	37B/AvB	0.283	113	9848.58	114	17832.4	115	176.266
1	Q9TV62	Myosin-4 OS=Sus scrofa GN=MYH4 PE=2 SV=1	30936	287893	1373	1373	114	114	96881	1	1	0	653.883	1305.75	2	1305.76	-0.0038	0	22.51	0.011	K	EALVSQLSR	G				Cmpd 12149, AutoMSn(653.8833), 135.4 min (13229323981863652)	13A/AvB	0.238	16A/AvB	0.253	27A/AvB	0.19	29A/AvB	0.245	10B/AvB	0.254	21B/AvB	0.284	25B/AvB	0.177	37B/AvB	0.285	113	30111.8	114	28212.4	115	29987.7
1	Q9TV62	Myosin-4 OS=Sus scrofa GN=MYH4 PE=2 SV=1	30936	287893	1373	1373	114	114	96884	1	1	0	653.884	1305.75	2	1305.76	-0.0035	0	20.92	0.02	K	EALVSQLSR	G				Cmpd 12602, AutoMSn(653.8835), 140.6 min (13229323981553820)	13A/AvB	0.261	16A/AvB	0.232	27A/AvB	0.248	29A/AvB	0.251	10B/AvB	0.215	21B/AvB	0.319	25B/AvB	0.169	37B/AvB	0.297	113	16221.8	114	19658.7	115	17537.6
1	Q9TV62	Myosin-4 OS=Sus scrofa GN=MYH4 PE=2 SV=1	30936	287893	1373	1373	114	114	96919	1	1	0	654.849	1307.68	2	1307.69	-0.0042	0	19.82	0.034	R	ELEEISER	L				Cmpd 9254, AutoMSn(654.8490), 103.0 min (13229323981857862)	13A/AvB	0.209	16A/AvB	0.267	27A/AvB	0.249	29A/AvB	0.242	10B/AvB	0.242	21B/AvB	0.321	25B/AvB	0.18	37B/AvB	0.257	113	60966.7	114	52789.3	115	67303.9
1	Q9TV62	Myosin-4 OS=Sus scrofa GN=MYH4 PE=2 SV=1	30936	287893	1373	1373	114	114	96920	1	1	0	654.849	1307.68	2	1307.69	-0.0041	0	21.55	0.048	R	ELEEISER	L				Cmpd 9608, AutoMSn(654.8490), 108.2 min (13229323981712619)	13A/AvB	0.224	16A/AvB	0.258	27A/AvB	0.156	29A/AvB	0.293	10B/AvB	0.203	21B/AvB	0.297	25B/AvB	0.195	37B/AvB	0.304	113	15292	114	16840.6	115	19396
1	Q9TV62	Myosin-4 OS=Sus scrofa GN=MYH4 PE=2 SV=1	30936	287893	1373	1373	114	114	96922	1	1	0	654.849	1307.68	2	1307.69	-0.0038	0	24.1	0.026	R	ELEEISER	L				Cmpd 9623, AutoMSn(654.8491), 108.2 min (13229323981761738)	13A/AvB	0.151	16A/AvB	0.182	27A/AvB	0	29A/AvB	0.231	10B/AvB	0.18	21B/AvB	0.632	25B/AvB	-0.027	37B/AvB	0.215	113	19101.6	114	15991.7	115	19233.3
1	Q9TV62	Myosin-4 OS=Sus scrofa GN=MYH4 PE=2 SV=1	30936	287893	1373	1373	114	114	96923	1	1	0	654.849	1307.68	2	1307.69	-0.0037	0	31.06	0.0053	R	ELEEISER	L				Cmpd 9504, AutoMSn(654.8492), 104.9 min (13229323981809701)	13A/AvB	0.222	16A/AvB	0.257	27A/AvB	0.226	29A/AvB	0.264	10B/AvB	0.225	21B/AvB	0.311	25B/AvB	0.181	37B/AvB	0.283	113	64831.8	114	64117.4	115	74144.6
1	Q9TV62	Myosin-4 OS=Sus scrofa GN=MYH4 PE=2 SV=1	30936	287893	1373	1373	114	114	96924	1	1	0	654.85	1307.68	2	1307.69	-0.0031	0	29.61	0.0073	R	ELEEISER	L				Cmpd 9661, AutoMSn(654.8495), 107.4 min (13229323981547938)	13A/AvB	0.161	16A/AvB	0.232	27A/AvB	0.214	29A/AvB	0.267	10B/AvB	0.224	21B/AvB	0.332	25B/AvB	0.188	37B/AvB	0.256	113	35064.7	114	25259.7	115	36305.6
1	Q9TV62	Myosin-4 OS=Sus scrofa GN=MYH4 PE=2 SV=1	30936	287893	1373	1373	114	114	96925	1	1	0	654.85	1307.68	2	1307.69	-0.0028	0	25.8	0.017	R	ELEEISER	L				Cmpd 9181, AutoMSn(654.8496), 102.2 min (13229323981857716)	13A/AvB	0.209	16A/AvB	0.228	27A/AvB	0.21	29A/AvB	0.247	10B/AvB	0.23	21B/AvB	0.295	25B/AvB	0.204	37B/AvB	0.271	113	92489.6	114	83922.4	115	91467.3
1	Q9TV62	Myosin-4 OS=Sus scrofa GN=MYH4 PE=2 SV=1	30936	287893	1373	1373	114	114	97009	1	1	0	437.278	1308.81	3	1308.82	-0.0111	0	24.82	0.038	K	IQLEAK	I				Cmpd 9182, AutoMSn(437.2778), 102.2 min (13229323981857718)	13A/AvB	0.189	16A/AvB	0.214	27A/AvB	0.244	29A/AvB	0.224	10B/AvB	0.355	21B/AvB	0.265	25B/AvB	0.154	37B/AvB	0.226	113	79244.2	114	42118.5	115	47863.8
1	Q9TV62	Myosin-4 OS=Sus scrofa GN=MYH4 PE=2 SV=1	30936	287893	1373	1373	114	114	97011	1	1	0	437.278	1308.81	3	1308.82	-0.01	0	26.35	0.027	K	IQLEAK	I				Cmpd 9346, AutoMSn(437.2782), 103.2 min (13229323981809385)	13A/AvB	0.227	16A/AvB	0.274	27A/AvB	0.237	29A/AvB	0.196	10B/AvB	0.262	21B/AvB	0.296	25B/AvB	0.234	37B/AvB	0.209	113	44328.4	114	38535.7	115	46361.8
1	Q9TV62	Myosin-4 OS=Sus scrofa GN=MYH4 PE=2 SV=1	30936	287893	1373	1373	114	114	97014	1	1	0	437.278	1308.81	3	1308.82	-0.0095	0	27.77	0.019	K	IQLEAK	I				Cmpd 9431, AutoMSn(437.2783), 104.1 min (13229323981809555)	13A/AvB	0.163	16A/AvB	0.236	27A/AvB	0.278	29A/AvB	0.227	10B/AvB	0.306	21B/AvB	0.269	25B/AvB	0.148	37B/AvB	0.276	113	57459.2	114	30600.1	115	44306.7
1	Q9TV62	Myosin-4 OS=Sus scrofa GN=MYH4 PE=2 SV=1	30936	287893	1373	1373	114	114	97022	1	1	0	437.279	1308.81	3	1308.82	-0.0081	0	29.19	0.014	K	IQLEAK	I				Cmpd 9358, AutoMSn(437.2788), 103.3 min (13229323981809409)	13A/AvB	0.192	16A/AvB	0.249	27A/AvB	0.234	29A/AvB	0.23	10B/AvB	0.253	21B/AvB	0.281	25B/AvB	0.197	37B/AvB	0.269	113	51722.8	114	39258.2	115	50859
1	Q9TV62	Myosin-4 OS=Sus scrofa GN=MYH4 PE=2 SV=1	30936	287893	1373	1373	114	114	97024	1	1	0	437.279	1308.81	3	1308.82	-0.008	0	33.12	0.0057	K	IQLEAK	I				Cmpd 9511, AutoMSn(437.2788), 105.7 min (13229323981547638)	13A/AvB	0.24	16A/AvB	0.359	27A/AvB	0.254	29A/AvB	0.196	10B/AvB	0.289	21B/AvB	0.295	25B/AvB	0.216	37B/AvB	0.2	113	27047.7	114	22423.9	115	33628.2
1	Q9TV62	Myosin-4 OS=Sus scrofa GN=MYH4 PE=2 SV=1	30936	287893	1373	1373	114	114	97025	1	1	0	437.279	1308.81	3	1308.82	-0.0079	0	29.94	0.011	K	IQLEAK	I				Cmpd 9101, AutoMSn(437.2788), 101.3 min (13229323981857556)	13A/AvB	0.193	16A/AvB	0.231	27A/AvB	0.244	29A/AvB	0.206	10B/AvB	0.296	21B/AvB	0.255	25B/AvB	0.2	37B/AvB	0.249	113	99943.8	114	65127.4	115	78054.9
1	Q9TV62	Myosin-4 OS=Sus scrofa GN=MYH4 PE=2 SV=1	30936	287893	1373	1373	114	114	97032	1	1	0	437.279	1308.82	3	1308.82	-0.0069	0	25.93	0.029	K	IQLEAK	I				Cmpd 9529, AutoMSn(437.2792), 105.9 min (13229323981547674)	13A/AvB	0.2	16A/AvB	0.218	27A/AvB	0.215	29A/AvB	0.248	10B/AvB	0.264	21B/AvB	0.245	25B/AvB	0.212	37B/AvB	0.279	113	44367.5	114	33604.8	115	36628.2
1	Q9TV62	Myosin-4 OS=Sus scrofa GN=MYH4 PE=2 SV=1	30936	287893	1373	1373	114	114	97033	1	1	0	437.279	1308.82	3	1308.82	-0.0068	0	28.53	0.016	K	IQLEAK	I				Cmpd 9467, AutoMSn(437.2793), 106.4 min (13229323981761426)	13A/AvB	-0.043	16A/AvB	0.005	27A/AvB	-0.002	29A/AvB	0.005	10B/AvB	0.576	21B/AvB	0.027	25B/AvB	0.304	37B/AvB	0.093	113	75292.9	114	-5590.58	115	614.53
1	Q9TV62	Myosin-4 OS=Sus scrofa GN=MYH4 PE=2 SV=1	30936	287893	1373	1373	114	114	97034	1	1	0	437.279	1308.82	3	1308.82	-0.0064	0	25.14	0.034	K	IQLEAK	I				Cmpd 9482, AutoMSn(437.2794), 106.7 min (13229323981712367)	13A/AvB	0.194	16A/AvB	0.252	27A/AvB	0.222	29A/AvB	0.223	10B/AvB	0.25	21B/AvB	0.274	25B/AvB	0.2	37B/AvB	0.275	113	25417.3	114	19674.4	115	25612.9
1	Q9TV62	Myosin-4 OS=Sus scrofa GN=MYH4 PE=2 SV=1	30936	287893	1373	1373	114	114	97322	1	1	0	439.252	1314.73	3	1314.74	-0.0085	0	14.72	0.042	K	CASLEK	T				Cmpd 6622, AutoMSn(439.2520), 72.9 min (13229323981803937)	13A/AvB	0.32	16A/AvB	0.482	27A/AvB	0.261	29A/AvB	0.216	10B/AvB	0.262	21B/AvB	0.412	25B/AvB	0.17	37B/AvB	0.156	113	25410	114	31031.2	115	46819
1	Q9TV62	Myosin-4 OS=Sus scrofa GN=MYH4 PE=2 SV=1	30936	287893	1373	1373	114	114	97324	1	1	0	439.252	1314.73	3	1314.74	-0.0078	0	14.89	0.04	K	CASLEK	T				Cmpd 6827, AutoMSn(439.2522), 75.6 min (13229323981542270)	13A/AvB	0.255	16A/AvB	0.513	27A/AvB	0.259	29A/AvB	0.201	10B/AvB	0.313	21B/AvB	0.396	25B/AvB	0.153	37B/AvB	0.139	113	19746.4	114	16118.2	115	32422
1	Q9TV62	Myosin-4 OS=Sus scrofa GN=MYH4 PE=2 SV=1	30936	287893	1373	1373	114	114	97326	1	1	0	439.252	1314.74	3	1314.74	-0.0075	0	18.5	0.018	K	CASLEK	T				Cmpd 6233, AutoMSn(439.2524), 69.7 min (13229323981851820)	13A/AvB	0.361	16A/AvB	0.344	27A/AvB	0.4	29A/AvB	0.185	10B/AvB	0.261	21B/AvB	0.415	25B/AvB	0.157	37B/AvB	0.167	113	70204.1	114	96960.7	115	92525.1
1	Q9TV62	Myosin-4 OS=Sus scrofa GN=MYH4 PE=2 SV=1	30936	287893	1373	1373	114	114	98665	1	1	0	448.619	1342.84	3	1342.84	-0.0082	0	14.59	0.043	R	VTFQLK	A				Cmpd 12043, AutoMSn(448.6190), 133.3 min (13229323981814779)	13A/AvB	0.216	16A/AvB	0.304	27A/AvB	0.214	29A/AvB	0.244	10B/AvB	0.375	21B/AvB	0.396	25B/AvB	0.104	37B/AvB	0.125	113	21699.6	114	12509.4	115	17615.5
1	Q9TV62	Myosin-4 OS=Sus scrofa GN=MYH4 PE=2 SV=1	30936	287893	1373	1373	114	114	99125	1	1	0	453.926	1358.76	3	1358.77	-0.0086	0	28.14	0.018	R	EAEFQK	M				Cmpd 7213, AutoMSn(453.9262), 80.5 min (13229323981853780)	13A/AvB	0.158	16A/AvB	0.194	27A/AvB	0.191	29A/AvB	0.214	10B/AvB	0.236	21B/AvB	0.25	25B/AvB	0.178	37B/AvB	0.336	113	127054	114	84951.6	115	104730
1	Q9TV62	Myosin-4 OS=Sus scrofa GN=MYH4 PE=2 SV=1	30936	287893	1373	1373	114	114	99127	1	1	0	453.926	1358.76	3	1358.77	-0.0084	0	27.69	0.02	R	EAEFQK	M				Cmpd 7552, AutoMSn(453.9263), 83.3 min (13229323981805797)	13A/AvB	0.169	16A/AvB	0.212	27A/AvB	0.198	29A/AvB	0.211	10B/AvB	0.23	21B/AvB	0.25	25B/AvB	0.18	37B/AvB	0.34	113	92924.9	114	68158.4	115	85647
1	Q9TV62	Myosin-4 OS=Sus scrofa GN=MYH4 PE=2 SV=1	30936	287893	1373	1373	114	114	99128	1	1	0	680.386	1358.76	2	1358.77	-0.0083	0	18.01	0.045	R	EAEFQK	M				Cmpd 7841, AutoMSn(680.3859), 88.0 min (13229323981758174)	13A/AvB	-0.03	16A/AvB	0.255	27A/AvB	0.219	29A/AvB	0.236	10B/AvB	0.333	21B/AvB	0.449	25B/AvB	-0.03	37B/AvB	0.248	113	15644.6	114	-1400.58	115	11948
1	Q9TV62	Myosin-4 OS=Sus scrofa GN=MYH4 PE=2 SV=1	30936	287893	1373	1373	114	114	99131	1	1	0	680.386	1358.76	2	1358.77	-0.0082	0	16.43	0.048	R	EAEFQK	M				Cmpd 7769, AutoMSn(680.3859), 87.2 min (13229323981758030)	13A/AvB	-0.021	16A/AvB	0.182	27A/AvB	0.003	29A/AvB	0.144	10B/AvB	0.331	21B/AvB	0.527	25B/AvB	-0.023	37B/AvB	0.165	113	23062.2	114	-1472.03	115	12659.8
1	Q9TV62	Myosin-4 OS=Sus scrofa GN=MYH4 PE=2 SV=1	30936	287893	1373	1373	114	114	99134	1	1	0	453.926	1358.76	3	1358.77	-0.0078	0	27.37	0.019	R	EAEFQK	M				Cmpd 7757, AutoMSn(453.9265), 87.0 min (13229323981758006)	13A/AvB	-0.076	16A/AvB	1.121	27A/AvB	0.695	29A/AvB	-0.015	10B/AvB	0.724	21B/AvB	0.02	25B/AvB	-0.014	37B/AvB	0.271	113	32915.5	114	-3469.75	115	51010.3
1	Q9TV62	Myosin-4 OS=Sus scrofa GN=MYH4 PE=2 SV=1	30936	287893	1373	1373	114	114	99135	1	1	0	453.927	1358.76	3	1358.77	-0.0076	0	26.16	0.028	R	EAEFQK	M				Cmpd 7802, AutoMSn(453.9266), 87.6 min (13229323981709007)	13A/AvB	0.183	16A/AvB	0.202	27A/AvB	0.179	29A/AvB	0.198	10B/AvB	0.239	21B/AvB	0.26	25B/AvB	0.172	37B/AvB	0.329	113	34652.2	114	26432.3	115	29276.3
1	Q9TV62	Myosin-4 OS=Sus scrofa GN=MYH4 PE=2 SV=1	30936	287893	1373	1373	114	114	99137	1	1	0	453.927	1358.76	3	1358.77	-0.0075	0	27.81	0.019	R	EAEFQK	M				Cmpd 7769, AutoMSn(453.9266), 86.1 min (13229323981544154)	13A/AvB	0.161	16A/AvB	0.199	27A/AvB	0.193	29A/AvB	0.199	10B/AvB	0.241	21B/AvB	0.242	25B/AvB	0.172	37B/AvB	0.345	113	63252.5	114	42274.9	115	52140.7
1	Q9TV62	Myosin-4 OS=Sus scrofa GN=MYH4 PE=2 SV=1	30936	287893	1373	1373	114	114	99143	1	1	0	680.387	1358.76	2	1358.77	-0.0064	0	21.21	0.028	R	EAEFQK	M				Cmpd 7745, AutoMSn(680.3869), 85.9 min (13229323981544106)	13A/AvB	0.158	16A/AvB	0.201	27A/AvB	0.16	29A/AvB	0.207	10B/AvB	0.287	21B/AvB	0.279	25B/AvB	0.183	37B/AvB	0.251	113	43774.1	114	24147.2	115	30694
1	Q9TV62	Myosin-4 OS=Sus scrofa GN=MYH4 PE=2 SV=1	30936	287893	1373	1373	114	114	99144	1	1	0	680.387	1358.76	2	1358.77	-0.0064	0	18.62	0.043	R	EAEFQK	M				Cmpd 7817, AutoMSn(680.3869), 86.7 min (13229323981544250)	13A/AvB	0.183	16A/AvB	0.206	27A/AvB	0.202	29A/AvB	0.217	10B/AvB	0.247	21B/AvB	0.293	25B/AvB	0.204	37B/AvB	0.256	113	35825.7	114	26453.1	115	29800
1	Q9TV62	Myosin-4 OS=Sus scrofa GN=MYH4 PE=2 SV=1	30936	287893	1373	1373	114	114	99359	1	1	0	455.576	1363.71	3	1363.72	-0.0078	0	28.78	0.0066	K	ANSEVAQWR	T				Cmpd 8247, AutoMSn(455.5764), 91.0 min (13229323981807187)	13A/AvB	0.197	16A/AvB	0.369	27A/AvB	0.318	29A/AvB	0.207	10B/AvB	0.294	21B/AvB	0.418	25B/AvB	0.13	37B/AvB	0.159	113	26692.7	114	17924.5	115	33566.6
1	Q9TV62	Myosin-4 OS=Sus scrofa GN=MYH4 PE=2 SV=1	30936	287893	1373	1373	114	114	99360	1	1	0	682.862	1363.71	2	1363.72	-0.0045	0	32.64	0.00087	K	ANSEVAQWR	T				Cmpd 8426, AutoMSn(682.8625), 94.7 min (13229323981710255)	13A/AvB	0.195	16A/AvB	0.272	27A/AvB	0.298	29A/AvB	0.281	10B/AvB	0.255	21B/AvB	0.303	25B/AvB	0.19	37B/AvB	0.252	113	10056.7	114	7697.77	115	10753.5
1	Q9TV62	Myosin-4 OS=Sus scrofa GN=MYH4 PE=2 SV=1	30936	287893	1373	1373	114	114	99361	1	1	0	682.863	1363.71	2	1363.72	-0.0039	0	28.61	0.0068	K	ANSEVAQWR	T				Cmpd 8520, AutoMSn(682.8629), 94.6 min (13229323981545656)	13A/AvB	0.234	16A/AvB	0.254	27A/AvB	0.224	29A/AvB	0.194	10B/AvB	0.231	21B/AvB	0.33	25B/AvB	0.18	37B/AvB	0.26	113	18161.5	114	18444.4	115	19969.1
1	Q9TV62	Myosin-4 OS=Sus scrofa GN=MYH4 PE=2 SV=1	30936	287893	1373	1373	114	114	99362	1	1	0	682.863	1363.71	2	1363.72	-0.0038	0	33.05	0.0025	K	ANSEVAQWR	T				Cmpd 8441, AutoMSn(682.8629), 94.8 min (13229323981759374)	13A/AvB	-0.025	16A/AvB	-0.005	27A/AvB	0	29A/AvB	0	10B/AvB	0.345	21B/AvB	0.546	25B/AvB	-0.023	37B/AvB	0.132	113	43029.9	114	-3174.09	115	-683.88
1	Q9TV62	Myosin-4 OS=Sus scrofa GN=MYH4 PE=2 SV=1	30936	287893	1373	1373	114	114	99363	1	1	0	682.863	1363.71	2	1363.72	-0.0037	0	26.82	0.0031	K	ANSEVAQWR	T				Cmpd 8513, AutoMSn(682.8630), 95.6 min (13229323981759518)	13A/AvB	-0.025	16A/AvB	-0.003	27A/AvB	0	29A/AvB	0	10B/AvB	0.343	21B/AvB	0.545	25B/AvB	-0.023	37B/AvB	0.134	113	67648.3	114	-4999.38	115	-614.104
1	Q9TV62	Myosin-4 OS=Sus scrofa GN=MYH4 PE=2 SV=1	30936	287893	1373	1373	114	114	99364	1	1	0	682.863	1363.71	2	1363.72	-0.0036	0	47.91	4.4e-05	K	ANSEVAQWR	T				Cmpd 8498, AutoMSn(682.8630), 95.5 min (13229323981710399)	13A/AvB	0.197	16A/AvB	0.212	27A/AvB	0.173	29A/AvB	0.205	10B/AvB	0.216	21B/AvB	0.298	25B/AvB	0.205	37B/AvB	0.281	113	23429.1	114	21422.4	115	23025.1
1	Q9TV62	Myosin-4 OS=Sus scrofa GN=MYH4 PE=2 SV=1	30936	287893	1373	1373	114	114	99365	1	1	0	682.863	1363.71	2	1363.72	-0.0034	0	31.04	0.0012	K	ANSEVAQWR	T				Cmpd 7917, AutoMSn(682.8631), 88.3 min (13229323981855188)	13A/AvB	0.185	16A/AvB	0.205	27A/AvB	0.199	29A/AvB	0.231	10B/AvB	0.244	21B/AvB	0.312	25B/AvB	0.194	37B/AvB	0.25	113	127020	114	96212	115	106975
1	Q9TV62	Myosin-4 OS=Sus scrofa GN=MYH4 PE=2 SV=1	30936	287893	1373	1373	114	114	99366	1	1	0	682.863	1363.71	2	1363.72	-0.0034	0	44.63	8.6e-05	K	ANSEVAQWR	T				Cmpd 8280, AutoMSn(682.8631), 91.4 min (13229323981807253)	13A/AvB	0.208	16A/AvB	0.249	27A/AvB	0.234	29A/AvB	0.23	10B/AvB	0.236	21B/AvB	0.339	25B/AvB	0.189	37B/AvB	0.236	113	46969.2	114	41453.3	115	49587.2
1	Q9TV62	Myosin-4 OS=Sus scrofa GN=MYH4 PE=2 SV=1	30936	287893	1373	1373	114	114	99367	1	1	0	682.863	1363.71	2	1363.72	-0.0033	0	28.9	0.0019	K	ANSEVAQWR	T				Cmpd 8208, AutoMSn(682.8631), 90.6 min (13229323981807109)	13A/AvB	0.213	16A/AvB	0.219	27A/AvB	0.232	29A/AvB	0.254	10B/AvB	0.232	21B/AvB	0.306	25B/AvB	0.206	37B/AvB	0.256	113	74115.8	114	67942.1	115	69852.9
1	Q9TV62	Myosin-4 OS=Sus scrofa GN=MYH4 PE=2 SV=1	30936	287893	1373	1373	114	114	99368	1	1	0	682.864	1363.71	2	1363.72	-0.0026	0	44.82	8.1e-05	K	ANSEVAQWR	T				Cmpd 8448, AutoMSn(682.8635), 93.7 min (13229323981545512)	13A/AvB	0.194	16A/AvB	0.173	27A/AvB	0.194	29A/AvB	0.22	10B/AvB	0.221	21B/AvB	0.326	25B/AvB	0.204	37B/AvB	0.248	113	52724.7	114	46235.8	115	41382.3
1	Q9TV62	Myosin-4 OS=Sus scrofa GN=MYH4 PE=2 SV=1	30936	287893	1373	1373	114	114	99483	1	1	1	456.617	1366.83	3	1366.84	-0.01	0	30.63	0.0038	R	NTQGVLK	D				Cmpd 6644, AutoMSn(456.6171), 73.2 min (13229323981803981)	13A/AvB	0.206	16A/AvB	0.351	27A/AvB	0.385	29A/AvB	0.244	10B/AvB	0.338	21B/AvB	0.337	25B/AvB	0.14	37B/AvB	0.185	113	81045	114	49306.4	115	84097.9
1	Q9TV62	Myosin-4 OS=Sus scrofa GN=MYH4 PE=2 SV=1	30936	287893	1373	1373	114	114	99484	1	1	1	456.617	1366.83	3	1366.84	-0.0094	0	26.92	0.02	R	NTQGVLK	D				Cmpd 6276, AutoMSn(456.6173), 70.1 min (13229323981851906)	13A/AvB	0.205	16A/AvB	0.325	27A/AvB	0.282	29A/AvB	0.221	10B/AvB	0.377	21B/AvB	0.345	25B/AvB	0.127	37B/AvB	0.151	113	133430	114	72531.1	115	115041
1	Q9TV62	Myosin-4 OS=Sus scrofa GN=MYH4 PE=2 SV=1	30936	287893	1373	1373	114	114	99489	1	1	1	456.618	1366.83	3	1366.84	-0.0084	0	14.85	0.04	R	NTQGVLK	D				Cmpd 6930, AutoMSn(456.6176), 77.7 min (13229323981756352)	13A/AvB	-0.066	16A/AvB	0.021	27A/AvB	0.288	29A/AvB	0.007	10B/AvB	0.882	21B/AvB	0.055	25B/AvB	-0.017	37B/AvB	0.079	113	97088.5	114	-7238.88	115	2274.78
1	Q9TV62	Myosin-4 OS=Sus scrofa GN=MYH4 PE=2 SV=1	30936	287893	1373	1373	114	114	99492	1	1	0	456.619	1366.83	3	1366.84	-0.0094	0	22.88	0.0083	K	ILAEWK	H				Cmpd 14720, AutoMSn(456.6186), 166.4 min (13229323981722843)	13A/AvB	0.061	16A/AvB	0.296	27A/AvB	0.186	29A/AvB	0.129	10B/AvB	0.428	21B/AvB	0.225	25B/AvB	0.198	37B/AvB	0.149	113	3625.65	114	517.193	115	2510.81
1	Q9TV62	Myosin-4 OS=Sus scrofa GN=MYH4 PE=2 SV=1	30936	287893	1373	1373	114	114	99494	1	1	0	456.619	1366.83	3	1366.84	-0.0091	0	19.19	0.016	K	ILAEWK	H				Cmpd 14975, AutoMSn(456.6187), 169.1 min (13229323981772442)	13A/AvB	-0.068	16A/AvB	0.914	27A/AvB	-0.015	29A/AvB	0.255	10B/AvB	0.669	21B/AvB	0.021	25B/AvB	-0.001	37B/AvB	0.311	113	12085.2	114	-1228.98	115	16504.1
1	Q9TV62	Myosin-4 OS=Sus scrofa GN=MYH4 PE=2 SV=1	30936	287893	1373	1373	114	114	99499	1	1	0	456.619	1366.83	3	1366.84	-0.0085	0	28.24	0.014	K	ILAEWK	H				Cmpd 14789, AutoMSn(456.6189), 167.0 min (13229323981772070)	13A/AvB	-0.042	16A/AvB	0.056	27A/AvB	-0.009	29A/AvB	0	10B/AvB	0.553	21B/AvB	0.028	25B/AvB	0.286	37B/AvB	0.133	113	17769.7	114	-1352.7	115	1791.34
1	Q9TV62	Myosin-4 OS=Sus scrofa GN=MYH4 PE=2 SV=1	30936	287893	1373	1373	114	114	99500	1	1	0	456.619	1366.83	3	1366.84	-0.0085	0	25.75	0.029	K	ILAEWK	H				Cmpd 14831, AutoMSn(456.6189), 164.7 min (13229323981820355)	13A/AvB	0.189	16A/AvB	0.292	27A/AvB	0.209	29A/AvB	0.221	10B/AvB	0.308	21B/AvB	0.267	25B/AvB	0.201	37B/AvB	0.223	113	26731.9	114	16389.5	115	25318.1
1	Q9TV62	Myosin-4 OS=Sus scrofa GN=MYH4 PE=2 SV=1	30936	287893	1373	1373	114	114	99503	1	1	0	456.619	1366.84	3	1366.84	-0.0082	0	25.22	0.036	K	ILAEWK	H				Cmpd 15011, AutoMSn(456.6190), 166.7 min (13229323981820715)	13A/AvB	0.149	16A/AvB	0.253	27A/AvB	0.213	29A/AvB	0.162	10B/AvB	0.381	21B/AvB	0.229	25B/AvB	0.188	37B/AvB	0.201	113	27918	114	10912	115	18524.6
1	Q9TV62	Myosin-4 OS=Sus scrofa GN=MYH4 PE=2 SV=1	30936	287893	1373	1373	114	114	99506	1	1	0	456.619	1366.84	3	1366.84	-0.008	0	27.6	0.018	K	ILAEWK	H				Cmpd 14730, AutoMSn(456.6191), 164.6 min (13229323981868814)	13A/AvB	0.15	16A/AvB	0.212	27A/AvB	0.181	29A/AvB	0.154	10B/AvB	0.398	21B/AvB	0.195	25B/AvB	0.165	37B/AvB	0.243	113	24017.5	114	9036.89	115	12813.1
1	Q9TV62	Myosin-4 OS=Sus scrofa GN=MYH4 PE=2 SV=1	30936	287893	1373	1373	114	114	99509	1	1	0	456.619	1366.84	3	1366.84	-0.0078	0	28.39	0.018	K	ILAEWK	H				Cmpd 14831, AutoMSn(456.6191), 167.5 min (13229323981772154)	13A/AvB	1.771	16A/AvB	-0.074	27A/AvB	0.349	29A/AvB	0.411	10B/AvB	0.509	21B/AvB	0.001	25B/AvB	-0.018	37B/AvB	0.508	113	12465	114	43382.2	115	-1823.54
1	Q9TV62	Myosin-4 OS=Sus scrofa GN=MYH4 PE=2 SV=1	30936	287893	1373	1373	114	114	99511	1	1	0	456.619	1366.84	3	1366.84	-0.0077	0	28.7	0.017	K	ILAEWK	H				Cmpd 14840, AutoMSn(456.6192), 167.8 min (13229323981723083)	13A/AvB	0.224	16A/AvB	0.242	27A/AvB	0.291	29A/AvB	0.289	10B/AvB	0.278	21B/AvB	0.177	25B/AvB	0.188	37B/AvB	0.357	113	6606.91	114	5336.01	115	5760.2
1	Q9TV62	Myosin-4 OS=Sus scrofa GN=MYH4 PE=2 SV=1	30936	287893	1373	1373	114	114	99514	1	1	0	456.619	1366.84	3	1366.84	-0.0075	0	18.68	0.03	K	ILAEWK	H				Cmpd 14558, AutoMSn(456.6192), 162.6 min (13229323981868470)	13A/AvB	0.183	16A/AvB	0.191	27A/AvB	0.095	29A/AvB	0.14	10B/AvB	0.41	21B/AvB	0.26	25B/AvB	0.145	37B/AvB	0.185	113	16754.1	114	7493.21	115	7816.5
1	Q9TV62	Myosin-4 OS=Sus scrofa GN=MYH4 PE=2 SV=1	30936	287893	1373	1373	114	114	99516	1	1	0	456.619	1366.84	3	1366.84	-0.0074	0	28.43	0.018	K	ILAEWK	H				Cmpd 14867, AutoMSn(456.6193), 165.1 min (13229323981820427)	13A/AvB	0.184	16A/AvB	0.293	27A/AvB	0.228	29A/AvB	0.226	10B/AvB	0.282	21B/AvB	0.236	25B/AvB	0.198	37B/AvB	0.283	113	52660.9	114	34446.7	115	54800
1	Q9TV62	Myosin-4 OS=Sus scrofa GN=MYH4 PE=2 SV=1	30936	287893	1373	1373	114	114	99518	1	1	0	684.425	1366.84	2	1366.84	-0.0073	0	21.74	0.028	K	ILAEWK	H				Cmpd 14940, AutoMSn(684.4253), 165.9 min (13229323981820573)	13A/AvB	0.196	16A/AvB	0.231	27A/AvB	0.186	29A/AvB	0.178	10B/AvB	0.254	21B/AvB	0.283	25B/AvB	0.181	37B/AvB	0.282	113	36753.5	114	28407.6	115	33436.2
1	Q9TV62	Myosin-4 OS=Sus scrofa GN=MYH4 PE=2 SV=1	30936	287893	1373	1373	114	114	99519	1	1	0	456.619	1366.84	3	1366.84	-0.0071	0	30.26	0.012	K	ILAEWK	H				Cmpd 14903, AutoMSn(456.6194), 168.3 min (13229323981772298)	13A/AvB	0.425	16A/AvB	2.315	27A/AvB	-0.001	29A/AvB	0.012	10B/AvB	0.461	21B/AvB	-0.123	25B/AvB	0.003	37B/AvB	0.659	113	14788.4	114	13618.6	115	74241.6
1	Q9TV62	Myosin-4 OS=Sus scrofa GN=MYH4 PE=2 SV=1	30936	287893	1373	1373	114	114	99520	1	1	0	684.425	1366.84	2	1366.84	-0.0071	0	19.99	0.031	K	ILAEWK	H				Cmpd 14622, AutoMSn(684.4254), 163.4 min (13229323981868598)	13A/AvB	0.2	16A/AvB	0.265	27A/AvB	0.18	29A/AvB	0.222	10B/AvB	0.264	21B/AvB	0.232	25B/AvB	0.21	37B/AvB	0.294	113	35926.1	114	27168.6	115	36056.7
1	Q9TV62	Myosin-4 OS=Sus scrofa GN=MYH4 PE=2 SV=1	30936	287893	1373	1373	114	114	99522	1	1	0	456.619	1366.84	3	1366.84	-0.007	0	28.45	0.018	K	ILAEWK	H				Cmpd 14939, AutoMSn(456.6194), 165.9 min (13229323981820571)	13A/AvB	0.164	16A/AvB	0.236	27A/AvB	0.193	29A/AvB	0.213	10B/AvB	0.254	21B/AvB	0.238	25B/AvB	0.21	37B/AvB	0.298	113	48568.1	114	31365.2	115	45105.6
1	Q9TV62	Myosin-4 OS=Sus scrofa GN=MYH4 PE=2 SV=1	30936	287893	1373	1373	114	114	99523	1	1	0	684.426	1366.84	2	1366.84	-0.007	0	20.29	0.018	K	ILAEWK	H				Cmpd 14792, AutoMSn(684.4255), 167.2 min (13229323981722987)	13A/AvB	0.127	16A/AvB	0.257	27A/AvB	0.2	29A/AvB	0.17	10B/AvB	0.26	21B/AvB	0.202	25B/AvB	0.239	37B/AvB	0.298	113	9656	114	4730.77	115	9525.98
1	Q9TV62	Myosin-4 OS=Sus scrofa GN=MYH4 PE=2 SV=1	30936	287893	1373	1373	114	114	99524	1	1	0	684.426	1366.84	2	1366.84	-0.007	0	21	0.015	K	ILAEWK	H				Cmpd 15093, AutoMSn(684.4255), 168.8 min (13229323981558802)	13A/AvB	0.204	16A/AvB	0.254	27A/AvB	0.173	29A/AvB	0.23	10B/AvB	0.257	21B/AvB	0.246	25B/AvB	0.158	37B/AvB	0.339	113	17497.4	114	13848.5	115	17303.8
1	Q9TV62	Myosin-4 OS=Sus scrofa GN=MYH4 PE=2 SV=1	30936	287893	1373	1373	114	114	99525	1	1	0	684.426	1366.84	2	1366.84	-0.0068	0	16.47	0.032	K	ILAEWK	H				Cmpd 14694, AutoMSn(684.4255), 164.2 min (13229323981868742)	13A/AvB	0.166	16A/AvB	0.233	27A/AvB	0.21	29A/AvB	0.253	10B/AvB	0.266	21B/AvB	0.227	25B/AvB	0.22	37B/AvB	0.287	113	22694.8	114	14185.6	115	19877.1
1	Q9TV62	Myosin-4 OS=Sus scrofa GN=MYH4 PE=2 SV=1	30936	287893	1373	1373	114	114	99527	1	1	0	456.62	1366.84	3	1366.84	-0.0068	0	26.61	0.027	K	ILAEWK	H				Cmpd 15112, AutoMSn(456.6195), 169.0 min (13229323981558840)	13A/AvB	0.13	16A/AvB	0.313	27A/AvB	0.161	29A/AvB	0.203	10B/AvB	0.333	21B/AvB	0.288	25B/AvB	0.182	37B/AvB	0.197	113	15337.5	114	5968.29	115	14401.1
1	Q9TV62	Myosin-4 OS=Sus scrofa GN=MYH4 PE=2 SV=1	30936	287893	1373	1373	114	114	99528	1	1	0	456.62	1366.84	3	1366.84	-0.0067	0	25.5	0.0054	K	ILAEWK	H				Cmpd 14973, AutoMSn(456.6195), 167.5 min (13229323981558562)	13A/AvB	0.209	16A/AvB	0.236	27A/AvB	0.158	29A/AvB	0.24	10B/AvB	0.267	21B/AvB	0.221	25B/AvB	0.265	37B/AvB	0.247	113	10076.2	114	7894.62	115	8922.8
1	Q9TV62	Myosin-4 OS=Sus scrofa GN=MYH4 PE=2 SV=1	30936	287893	1373	1373	114	114	99529	1	1	0	456.62	1366.84	3	1366.84	-0.0065	0	28.96	0.016	K	ILAEWK	H				Cmpd 14768, AutoMSn(456.6196), 167.0 min (13229323981722939)	13A/AvB	0.169	16A/AvB	0.334	27A/AvB	0.212	29A/AvB	0.157	10B/AvB	0.328	21B/AvB	0.188	25B/AvB	0.235	37B/AvB	0.249	113	8800.92	114	4530.15	115	8966.62
1	Q9TV62	Myosin-4 OS=Sus scrofa GN=MYH4 PE=2 SV=1	30936	287893	1373	1373	114	114	99530	1	1	0	456.62	1366.84	3	1366.84	-0.0059	0	32.61	0.0087	K	ILAEWK	H				Cmpd 15039, AutoMSn(456.6198), 168.2 min (13229323981558694)	13A/AvB	0.166	16A/AvB	0.299	27A/AvB	0.192	29A/AvB	0.221	10B/AvB	0.284	21B/AvB	0.23	25B/AvB	0.225	37B/AvB	0.261	113	32948.4	114	19234.3	115	34676.3
1	Q9TV62	Myosin-4 OS=Sus scrofa GN=MYH4 PE=2 SV=1	30936	287893	1373	1373	114	114	99531	1	1	0	456.62	1366.84	3	1366.84	-0.0059	0	28.3	0.019	K	ILAEWK	H				Cmpd 14658, AutoMSn(456.6198), 163.8 min (13229323981868670)	13A/AvB	0.156	16A/AvB	0.267	27A/AvB	0.167	29A/AvB	0.226	10B/AvB	0.278	21B/AvB	0.218	25B/AvB	0.209	37B/AvB	0.295	113	56130.9	114	31409.6	115	53813
1	Q9TV62	Myosin-4 OS=Sus scrofa GN=MYH4 PE=2 SV=1	30936	287893	1373	1373	114	114	99532	1	1	0	684.426	1366.84	2	1366.84	-0.0057	0	21.62	0.027	K	ILAEWK	H				Cmpd 15021, AutoMSn(684.4261), 168.0 min (13229323981558658)	13A/AvB	0.171	16A/AvB	0.3	27A/AvB	0.212	29A/AvB	0.307	10B/AvB	0.266	21B/AvB	0.205	25B/AvB	0.229	37B/AvB	0.3	113	28541.9	114	18416.6	115	32235.2
1	Q9TV62	Myosin-4 OS=Sus scrofa GN=MYH4 PE=2 SV=1	30936	287893	1373	1373	114	114	99534	1	1	0	456.62	1366.84	3	1366.84	-0.0055	0	30.06	0.013	K	ILAEWK	H				Cmpd 14586, AutoMSn(456.6199), 163.0 min (13229323981868526)	13A/AvB	0.16	16A/AvB	0.248	27A/AvB	0.17	29A/AvB	0.187	10B/AvB	0.341	21B/AvB	0.223	25B/AvB	0.192	37B/AvB	0.244	113	41421.2	114	19376.8	115	30089.3
1	Q9TV62	Myosin-4 OS=Sus scrofa GN=MYH4 PE=2 SV=1	30936	287893	1373	1373	114	114	99718	1	1	1	457.934	1370.78	3	1370.79	-0.0054	0	25.91	0.0037	K	TLAFLFAER	Q				Cmpd 18409, AutoMSn(457.9343), 205.3 min (13229323981827511)	13A/AvB	0.16	16A/AvB	0.116	27A/AvB	0.246	29A/AvB	0.231	10B/AvB	0.38	21B/AvB	0.378	25B/AvB	0.046	37B/AvB	0.196	113	4087.2	114	1725.7	115	1249.34
1	Q9TV62	Myosin-4 OS=Sus scrofa GN=MYH4 PE=2 SV=1	30936	287893	1373	1373	114	114	99722	1	1	1	686.398	1370.78	2	1370.79	-0.0046	0	36.77	0.00065	K	TLAFLFAER	Q				Cmpd 18426, AutoMSn(686.3982), 205.5 min (13229323981827545)	13A/AvB	0.216	16A/AvB	0.272	27A/AvB	0.277	29A/AvB	0.164	10B/AvB	0.368	21B/AvB	0.35	25B/AvB	0.112	37B/AvB	0.17	113	13476.5	114	7911.55	115	9985.71
1	Q9TV62	Myosin-4 OS=Sus scrofa GN=MYH4 PE=2 SV=1	30936	287893	1373	1373	114	114	99726	1	1	1	686.399	1370.78	2	1370.79	-0.0039	0	22.01	0.0086	K	TLAFLFAER	Q				Cmpd 18198, AutoMSn(686.3986), 204.1 min (13229323981875750)	13A/AvB	0.252	16A/AvB	0.299	27A/AvB	0.259	29A/AvB	0.216	10B/AvB	0.412	21B/AvB	0.244	25B/AvB	0.15	37B/AvB	0.194	113	22376.9	114	13679.9	115	16273.9
1	Q9TV62	Myosin-4 OS=Sus scrofa GN=MYH4 PE=2 SV=1	30936	287893	1373	1373	114	114	99730	1	1	1	686.399	1370.78	2	1370.79	-0.0033	0	22.19	0.027	K	TLAFLFAER	Q				Cmpd 18417, AutoMSn(686.3989), 206.7 min (13229323981565450)	13A/AvB	0.134	16A/AvB	0.245	27A/AvB	0.143	29A/AvB	0.124	10B/AvB	0.451	21B/AvB	0.213	25B/AvB	0.143	37B/AvB	0.193	113	10842.8	114	3224.11	115	5878.03
1	Q9TV62	Myosin-4 OS=Sus scrofa GN=MYH4 PE=2 SV=1	30936	287893	1373	1373	114	114	100365	1	1	0	462.271	1383.79	3	1383.8	-0.0085	0	22.79	0.012	R	CDQLIK	T				Cmpd 7785, AutoMSn(462.2713), 86.8 min (13229323981854924)	13A/AvB	0.213	16A/AvB	0.312	27A/AvB	0.269	29A/AvB	0.192	10B/AvB	0.302	21B/AvB	0.372	25B/AvB	0.157	37B/AvB	0.169	113	96993.6	114	68302.8	115	100186
1	Q9TV62	Myosin-4 OS=Sus scrofa GN=MYH4 PE=2 SV=1	30936	287893	1373	1373	114	114	100369	1	1	0	462.272	1383.79	3	1383.8	-0.0078	0	20.4	0.012	R	CDQLIK	T				Cmpd 8094, AutoMSn(462.2715), 89.3 min (13229323981806881)	13A/AvB	0.231	16A/AvB	0.333	27A/AvB	0.235	29A/AvB	0.205	10B/AvB	0.273	21B/AvB	0.369	25B/AvB	0.161	37B/AvB	0.196	113	38381.4	114	32470.1	115	46719.6
1	Q9TV62	Myosin-4 OS=Sus scrofa GN=MYH4 PE=2 SV=1	30936	287893	1373	1373	114	114	101757	1	1	0	477.603	1429.79	3	1429.79	-0.006	0	33.33	0.00075	K	SALAHAVQSSR	H				Cmpd 7605, AutoMSn(477.6034), 84.8 min (13229323981854564)	13A/AvB	0.285	16A/AvB	0.483	27A/AvB	0.317	29A/AvB	0.206	10B/AvB	0.297	21B/AvB	0.446	25B/AvB	0.115	37B/AvB	0.141	113	50293	114	48182.9	115	81633.1
1	Q9TV62	Myosin-4 OS=Sus scrofa GN=MYH4 PE=2 SV=1	30936	287893	1373	1373	114	114	101758	1	1	0	477.603	1429.79	3	1429.79	-0.0057	0	22.75	0.0073	K	SALAHAVQSSR	H				Cmpd 8162, AutoMSn(477.6035), 90.1 min (13229323981807017)	13A/AvB	0.283	16A/AvB	0.505	27A/AvB	0.357	29A/AvB	0.179	10B/AvB	0.273	21B/AvB	0.431	25B/AvB	0.148	37B/AvB	0.148	113	27065.8	114	28088.1	115	50172.1
1	Q9TV62	Myosin-4 OS=Sus scrofa GN=MYH4 PE=2 SV=1	30936	287893	1373	1373	114	114	101760	1	1	0	477.604	1429.79	3	1429.79	-0.0046	0	19.96	0.013	K	SALAHAVQSSR	H				Cmpd 8724, AutoMSn(477.6039), 98.0 min (13229323981759940)	13A/AvB	-0.03	16A/AvB	0.051	27A/AvB	0.245	29A/AvB	-0.005	10B/AvB	0.78	21B/AvB	0.169	25B/AvB	-0.019	37B/AvB	0.07	113	41601.1	114	-1586.95	115	2742.1
1	Q9TV62	Myosin-4 OS=Sus scrofa GN=MYH4 PE=2 SV=1	30936	287893	1373	1373	114	114	102136	1	1	0	480.293	1437.86	3	1437.87	-0.0095	0	26.01	0.0054	R	LQDLVDK	L				Cmpd 13031, AutoMSn(480.2925), 144.4 min (13229323981816755)	13A/AvB	0.225	16A/AvB	0.241	27A/AvB	0.22	29A/AvB	0.233	10B/AvB	0.349	21B/AvB	0.294	25B/AvB	0.15	37B/AvB	0.207	113	38063.5	114	24510.4	115	26209.2
1	Q9TV62	Myosin-4 OS=Sus scrofa GN=MYH4 PE=2 SV=1	30936	287893	1373	1373	114	114	102169	1	1	0	480.293	1437.86	3	1437.87	-0.0084	0	21.39	0.013	R	LQDLVDK	L				Cmpd 13013, AutoMSn(480.2929), 146.8 min (13229323981768518)	13A/AvB	-0.074	16A/AvB	1.078	27A/AvB	0.939	29A/AvB	0.007	10B/AvB	0.698	21B/AvB	-0.022	25B/AvB	-0.048	37B/AvB	0.372	113	13913.8	114	-1464.99	115	21477.7
1	Q9TV62	Myosin-4 OS=Sus scrofa GN=MYH4 PE=2 SV=1	30936	287893	1373	1373	114	114	102173	1	1	0	480.293	1437.86	3	1437.87	-0.0084	0	24.85	0.0074	R	LQDLVDK	L				Cmpd 13137, AutoMSn(480.2929), 146.6 min (13229323981554890)	13A/AvB	0.184	16A/AvB	0.263	27A/AvB	0.206	29A/AvB	0.235	10B/AvB	0.312	21B/AvB	0.314	25B/AvB	0.158	37B/AvB	0.217	113	21026.1	114	12448.8	115	17763.8
1	Q9TV62	Myosin-4 OS=Sus scrofa GN=MYH4 PE=2 SV=1	30936	287893	1373	1373	114	114	102174	1	1	0	480.293	1437.86	3	1437.87	-0.0084	0	34.57	0.0022	R	LQDLVDK	L				Cmpd 12702, AutoMSn(480.2929), 141.6 min (13229323981864758)	13A/AvB	0.243	16A/AvB	0.183	27A/AvB	0.245	29A/AvB	0.226	10B/AvB	0.328	21B/AvB	0.273	25B/AvB	0.158	37B/AvB	0.241	113	22604.4	114	16737.4	115	12596.3
1	Q9TV62	Myosin-4 OS=Sus scrofa GN=MYH4 PE=2 SV=1	30936	287893	1373	1373	114	114	102180	1	1	0	480.293	1437.86	3	1437.87	-0.0077	0	27.82	0.0042	R	LQDLVDK	L				Cmpd 13010, AutoMSn(480.2931), 146.9 min (13229323981719423)	13A/AvB	0.239	16A/AvB	0.324	27A/AvB	0.3	29A/AvB	0.194	10B/AvB	0.336	21B/AvB	0.255	25B/AvB	0.229	37B/AvB	0.18	113	5873.58	114	4170.7	115	5667.89
1	Q9TV62	Myosin-4 OS=Sus scrofa GN=MYH4 PE=2 SV=1	30936	287893	1373	1373	114	114	102182	1	1	0	480.293	1437.86	3	1437.87	-0.0075	0	15.3	0.037	R	LQDLVDK	L				Cmpd 12970, AutoMSn(480.2932), 143.8 min (13229323981816633)	13A/AvB	0.167	16A/AvB	0.289	27A/AvB	0.288	29A/AvB	0.203	10B/AvB	0.345	21B/AvB	0.26	25B/AvB	0.132	37B/AvB	0.263	113	29531.2	114	14291.2	115	24705.7
1	Q9TV62	Myosin-4 OS=Sus scrofa GN=MYH4 PE=2 SV=1	30936	287893	1373	1373	114	114	102864	1	1	0	729.378	1456.74	2	1456.75	-0.0059	0	29.34	0.0044	R	LQTESGEFSR	Q				Cmpd 8423, AutoMSn(729.3776), 92.9 min (13229323981807539)	13A/AvB	0.187	16A/AvB	0.335	27A/AvB	0.289	29A/AvB	0.241	10B/AvB	0.279	21B/AvB	0.389	25B/AvB	0.106	37B/AvB	0.225	113	17542.6	114	11726.8	115	21029.4
1	Q9TV62	Myosin-4 OS=Sus scrofa GN=MYH4 PE=2 SV=1	30936	287893	1373	1373	114	114	102866	1	1	0	729.378	1456.74	2	1456.75	-0.0044	0	27.59	0.0069	R	LQTESGEFSR	Q				Cmpd 8570, AutoMSn(729.3783), 96.4 min (13229323981710543)	13A/AvB	0.165	16A/AvB	0.242	27A/AvB	0.226	29A/AvB	0.164	10B/AvB	0.255	21B/AvB	0.338	25B/AvB	0.171	37B/AvB	0.235	113	11290.3	114	7313.02	115	10691.3
1	Q9TV62	Myosin-4 OS=Sus scrofa GN=MYH4 PE=2 SV=1	30936	287893	1373	1373	114	114	102868	1	1	0	729.379	1456.74	2	1456.75	-0.0041	0	39.91	0.0004	R	LQTESGEFSR	Q				Cmpd 8585, AutoMSn(729.3785), 96.4 min (13229323981759662)	13A/AvB	0.522	16A/AvB	-0.003	27A/AvB	0.239	29A/AvB	0.271	10B/AvB	0.179	21B/AvB	0.57	25B/AvB	-0.036	37B/AvB	0.288	113	12571.7	114	36664.6	115	-224.618
1	Q9TV62	Myosin-4 OS=Sus scrofa GN=MYH4 PE=2 SV=1	30936	287893	1373	1373	114	114	102869	1	1	0	729.379	1456.74	2	1456.75	-0.0041	0	29.59	0.0043	R	LQTESGEFSR	Q				Cmpd 8130, AutoMSn(729.3785), 90.6 min (13229323981855614)	13A/AvB	0.285	16A/AvB	0.307	27A/AvB	0.238	29A/AvB	0.23	10B/AvB	0.231	21B/AvB	0.345	25B/AvB	0.177	37B/AvB	0.247	113	28480.9	114	35085.2	115	37789.5
1	Q9TV62	Myosin-4 OS=Sus scrofa GN=MYH4 PE=2 SV=1	30936	287893	1373	1373	114	114	102870	1	1	0	729.379	1456.74	2	1456.75	-0.0034	0	27.07	0.0078	R	LQTESGEFSR	Q				Cmpd 8730, AutoMSn(729.3788), 96.9 min (13229323981546076)	13A/AvB	0.19	16A/AvB	0.311	27A/AvB	0.198	29A/AvB	0.249	10B/AvB	0.237	21B/AvB	0.292	25B/AvB	0.191	37B/AvB	0.28	113	17719.7	114	14228	115	23248.6
1	Q9TV62	Myosin-4 OS=Sus scrofa GN=MYH4 PE=2 SV=1	30936	287893	1373	1373	114	114	102871	1	1	0	729.379	1456.74	2	1456.75	-0.0033	0	39.31	0.00053	R	LQTESGEFSR	Q				Cmpd 8672, AutoMSn(729.3788), 97.5 min (13229323981710747)	13A/AvB	0.247	16A/AvB	0.262	27A/AvB	0.211	29A/AvB	0.24	10B/AvB	0.2	21B/AvB	0.269	25B/AvB	0.188	37B/AvB	0.343	113	18610.8	114	22996	115	24330.9
1	Q9TV62	Myosin-4 OS=Sus scrofa GN=MYH4 PE=2 SV=1	30936	287893	1373	1373	114	114	102872	1	1	0	729.379	1456.74	2	1456.75	-0.0033	0	41.76	0.0003	R	LQTESGEFSR	Q				Cmpd 8687, AutoMSn(729.3788), 97.6 min (13229323981759866)	13A/AvB	0.477	16A/AvB	-0.03	27A/AvB	0.202	29A/AvB	0.286	10B/AvB	0.206	21B/AvB	0.557	25B/AvB	-0.029	37B/AvB	0.266	113	16597.4	114	38509.3	115	-2403.81
1	Q9TV62	Myosin-4 OS=Sus scrofa GN=MYH4 PE=2 SV=1	30936	287893	1373	1373	114	114	102873	1	1	0	729.379	1456.74	2	1456.75	-0.0032	0	55.39	1.3e-05	R	LQTESGEFSR	Q				Cmpd 8436, AutoMSn(729.3789), 93.1 min (13229323981807565)	13A/AvB	0.241	16A/AvB	0.299	27A/AvB	0.245	29A/AvB	0.24	10B/AvB	0.256	21B/AvB	0.297	25B/AvB	0.195	37B/AvB	0.252	113	49411.7	114	46527.4	115	57716.7
1	Q9TV62	Myosin-4 OS=Sus scrofa GN=MYH4 PE=2 SV=1	30936	287893	1373	1373	114	114	102874	1	1	0	729.379	1456.74	2	1456.75	-0.0031	0	42.19	0.00022	R	LQTESGEFSR	Q				Cmpd 8533, AutoMSn(729.3789), 94.2 min (13229323981807759)	13A/AvB	0.246	16A/AvB	0.251	27A/AvB	0.209	29A/AvB	0.228	10B/AvB	0.201	21B/AvB	0.299	25B/AvB	0.192	37B/AvB	0.308	113	48679.1	114	59757.5	115	60932.3
1	Q9TV62	Myosin-4 OS=Sus scrofa GN=MYH4 PE=2 SV=1	30936	287893	1373	1373	114	114	102875	1	1	0	729.379	1456.74	2	1456.75	-0.003	0	42.25	0.00022	R	LQTESGEFSR	Q				Cmpd 8230, AutoMSn(729.3790), 91.7 min (13229323981855814)	13A/AvB	0.242	16A/AvB	0.266	27A/AvB	0.223	29A/AvB	0.227	10B/AvB	0.215	21B/AvB	0.314	25B/AvB	0.191	37B/AvB	0.28	113	89784.6	114	100961	115	111073
1	Q9TV62	Myosin-4 OS=Sus scrofa GN=MYH4 PE=2 SV=1	30936	287893	1373	1373	114	114	102876	1	1	0	729.379	1456.74	2	1456.75	-0.003	0	44.02	0.00014	R	LQTESGEFSR	Q				Cmpd 8139, AutoMSn(729.3790), 90.7 min (13229323981855632)	13A/AvB	0.247	16A/AvB	0.246	27A/AvB	0.209	29A/AvB	0.231	10B/AvB	0.21	21B/AvB	0.333	25B/AvB	0.179	37B/AvB	0.278	113	82943.3	114	97293.2	115	97051.8
1	Q9TV62	Myosin-4 OS=Sus scrofa GN=MYH4 PE=2 SV=1	30936	287893	1373	1373	114	114	102877	1	1	0	729.379	1456.74	2	1456.75	-0.0028	0	42.19	0.00022	R	LQTESGEFSR	Q				Cmpd 8622, AutoMSn(729.3791), 95.7 min (13229323981545860)	13A/AvB	0.199	16A/AvB	0.282	27A/AvB	0.225	29A/AvB	0.213	10B/AvB	0.237	21B/AvB	0.318	25B/AvB	0.175	37B/AvB	0.27	113	37999.2	114	31928.3	115	45137.2
1	Q9TV62	Myosin-4 OS=Sus scrofa GN=MYH4 PE=2 SV=1	30936	287893	1373	1373	114	114	102878	1	1	0	729.379	1456.74	2	1456.75	-0.0028	0	54.53	1.3e-05	R	LQTESGEFSR	Q				Cmpd 8615, AutoMSn(729.3791), 96.8 min (13229323981759722)	13A/AvB	0.147	16A/AvB	0.157	27A/AvB	0	29A/AvB	-0.001	10B/AvB	0.14	21B/AvB	0.678	25B/AvB	-0.023	37B/AvB	0.204	113	50741.1	114	53274.2	115	56857.5
1	Q9TV62	Myosin-4 OS=Sus scrofa GN=MYH4 PE=2 SV=1	30936	287893	1373	1373	114	114	102879	1	1	0	729.379	1456.74	2	1456.75	-0.0027	0	47.67	6.2e-05	R	LQTESGEFSR	Q				Cmpd 8600, AutoMSn(729.3792), 96.7 min (13229323981710603)	13A/AvB	0.228	16A/AvB	0.229	27A/AvB	0.195	29A/AvB	0.231	10B/AvB	0.224	21B/AvB	0.293	25B/AvB	0.19	37B/AvB	0.293	113	36067.5	114	36605.5	115	36800
1	Q9TV62	Myosin-4 OS=Sus scrofa GN=MYH4 PE=2 SV=1	30936	287893	1373	1373	114	114	102880	1	1	0	729.379	1456.74	2	1456.75	-0.0027	0	43.97	0.00015	R	LQTESGEFSR	Q				Cmpd 8157, AutoMSn(729.3791), 90.9 min (13229323981855668)	13A/AvB	0.23	16A/AvB	0.249	27A/AvB	0.188	29A/AvB	0.222	10B/AvB	0.224	21B/AvB	0.295	25B/AvB	0.194	37B/AvB	0.288	113	128041	114	131745	115	142304
1	Q9TV62	Myosin-4 OS=Sus scrofa GN=MYH4 PE=2 SV=1	30936	287893	1373	1373	114	114	102881	1	1	0	729.379	1456.74	2	1456.75	-0.0026	0	46.04	9.1e-05	R	LQTESGEFSR	Q				Cmpd 8658, AutoMSn(729.3792), 96.1 min (13229323981545932)	13A/AvB	0.242	16A/AvB	0.241	27A/AvB	0.189	29A/AvB	0.253	10B/AvB	0.231	21B/AvB	0.298	25B/AvB	0.204	37B/AvB	0.267	113	75172.8	114	78831.4	115	78691
1	Q9TV62	Myosin-4 OS=Sus scrofa GN=MYH4 PE=2 SV=1	30936	287893	1373	1373	114	114	102882	1	1	0	729.38	1456.74	2	1456.75	-0.0019	0	46.04	8.8e-05	R	LQTESGEFSR	Q				Cmpd 8460, AutoMSn(729.3796), 93.4 min (13229323981807613)	13A/AvB	0.221	16A/AvB	0.267	27A/AvB	0.214	29A/AvB	0.245	10B/AvB	0.217	21B/AvB	0.307	25B/AvB	0.181	37B/AvB	0.295	113	72345.8	114	73662	115	88708.4
1	Q9TV62	Myosin-4 OS=Sus scrofa GN=MYH4 PE=2 SV=1	30936	287893	1373	1373	114	114	103140	1	1	0	490.292	1467.85	3	1467.87	-0.0111	0	15.03	0.039	R	IHFGTTGK	L				Cmpd 9106, AutoMSn(490.2922), 100.5 min (13229323981808905)	13A/AvB	0.229	16A/AvB	0.379	27A/AvB	0.267	29A/AvB	0.247	10B/AvB	0.309	21B/AvB	0.396	25B/AvB	0.138	37B/AvB	0.158	113	39504.8	114	29351	115	48496.2
1	Q9TV62	Myosin-4 OS=Sus scrofa GN=MYH4 PE=2 SV=1	30936	287893	1373	1373	114	114	103144	1	1	0	490.293	1467.86	3	1467.87	-0.0102	0	20.54	0.012	R	IHFGTTGK	L				Cmpd 8593, AutoMSn(490.2925), 95.7 min (13229323981856540)	13A/AvB	0.246	16A/AvB	0.324	27A/AvB	0.284	29A/AvB	0.233	10B/AvB	0.273	21B/AvB	0.373	25B/AvB	0.139	37B/AvB	0.215	113	73072.1	114	65734.4	115	86825.8
1	Q9TV62	Myosin-4 OS=Sus scrofa GN=MYH4 PE=2 SV=1	30936	287893	1373	1373	114	114	103148	1	1	0	490.293	1467.86	3	1467.87	-0.0087	0	15.87	0.032	R	IHFGTTGK	L				Cmpd 9433, AutoMSn(490.2930), 104.8 min (13229323981547482)	13A/AvB	0.233	16A/AvB	0.278	27A/AvB	0.251	29A/AvB	0.193	10B/AvB	0.267	21B/AvB	0.34	25B/AvB	0.153	37B/AvB	0.241	113	37782.9	114	33082.4	115	39367.3
1	Q9TV62	Myosin-4 OS=Sus scrofa GN=MYH4 PE=2 SV=1	30936	287893	1373	1373	114	114	103150	1	1	0	490.293	1467.86	3	1467.87	-0.0082	0	14.16	0.047	R	IHFGTTGK	L				Cmpd 9425, AutoMSn(490.2932), 104.7 min (13229323981547466)	13A/AvB	0.22	16A/AvB	0.257	27A/AvB	0.254	29A/AvB	0.201	10B/AvB	0.3	21B/AvB	0.349	25B/AvB	0.145	37B/AvB	0.206	113	29516.9	114	21669	115	25216.8
1	Q9TV62	Myosin-4 OS=Sus scrofa GN=MYH4 PE=2 SV=1	30936	287893	1373	1373	114	114	103377	1	1	0	493.296	1476.87	3	1476.88	-0.0144	0	17.96	0.021	R	ILYADFK	Q				Cmpd 14647, AutoMSn(493.2959), 163.6 min (13229323981868648)	13A/AvB	0.232	16A/AvB	0.357	27A/AvB	0.3	29A/AvB	0.151	10B/AvB	0.387	21B/AvB	0.324	25B/AvB	0.15	37B/AvB	0.139	113	6115.52	114	3671.61	115	5640.68
1	Q9TV62	Myosin-4 OS=Sus scrofa GN=MYH4 PE=2 SV=1	30936	287893	1373	1373	114	114	103383	1	1	0	493.298	1476.87	3	1476.88	-0.0095	0	22.91	0.008	R	ILYADFK	Q				Cmpd 14596, AutoMSn(493.2975), 165.0 min (13229323981722595)	13A/AvB	0.26	16A/AvB	0.241	27A/AvB	0.355	29A/AvB	0.307	10B/AvB	0.293	21B/AvB	0.2	25B/AvB	0.245	37B/AvB	0.261	113	4347.76	114	3855.24	115	3567.59
1	Q9TV62	Myosin-4 OS=Sus scrofa GN=MYH4 PE=2 SV=1	30936	287893	1373	1373	114	114	103387	1	1	0	493.298	1476.87	3	1476.88	-0.0085	0	14.17	0.047	R	ILYADFK	Q				Cmpd 14554, AutoMSn(493.2978), 164.5 min (13229323981722511)	13A/AvB	0.091	16A/AvB	0.201	27A/AvB	0.099	29A/AvB	0.141	10B/AvB	0.387	21B/AvB	0.367	25B/AvB	0.138	37B/AvB	0.108	113	2924.04	114	685.927	115	1522.45
1	Q9TV62	Myosin-4 OS=Sus scrofa GN=MYH4 PE=2 SV=1	30936	287893	1373	1373	114	114	103388	1	1	0	493.298	1476.87	3	1476.88	-0.0085	0	22.16	0.0083	R	ILYADFK	Q				Cmpd 14829, AutoMSn(493.2978), 165.8 min (13229323981558274)	13A/AvB	0.231	16A/AvB	0.243	27A/AvB	0.259	29A/AvB	0.188	10B/AvB	0.304	21B/AvB	0.207	25B/AvB	0.176	37B/AvB	0.314	113	14991.4	114	11431.8	115	11995.2
1	Q9TV62	Myosin-4 OS=Sus scrofa GN=MYH4 PE=2 SV=1	30936	287893	1373	1373	114	114	103389	1	1	0	493.298	1476.87	3	1476.88	-0.0085	0	20.42	0.012	R	ILYADFK	Q				Cmpd 14833, AutoMSn(493.2978), 164.7 min (13229323981820359)	13A/AvB	0.214	16A/AvB	0.295	27A/AvB	0.274	29A/AvB	0.164	10B/AvB	0.311	21B/AvB	0.296	25B/AvB	0.171	37B/AvB	0.222	113	20531.3	114	14107.6	115	19431.6
1	Q9TV62	Myosin-4 OS=Sus scrofa GN=MYH4 PE=2 SV=1	30936	287893	1373	1373	114	114	103390	1	1	0	739.443	1476.87	2	1476.88	-0.0084	0	15.03	0.048	R	ILYADFK	Q				Cmpd 14597, AutoMSn(739.4432), 165.0 min (13229323981722597)	13A/AvB	0.251	16A/AvB	0.166	27A/AvB	0.211	29A/AvB	0.168	10B/AvB	0.269	21B/AvB	0.211	25B/AvB	0.213	37B/AvB	0.307	113	3840.07	114	3587.95	115	2373.6
1	Q9TV62	Myosin-4 OS=Sus scrofa GN=MYH4 PE=2 SV=1	30936	287893	1373	1373	114	114	103392	1	1	0	493.298	1476.87	3	1476.88	-0.0082	0	14.84	0.041	R	ILYADFK	Q				Cmpd 14795, AutoMSn(493.2979), 165.4 min (13229323981558206)	13A/AvB	0.193	16A/AvB	0.329	27A/AvB	0.213	29A/AvB	0.175	10B/AvB	0.294	21B/AvB	0.374	25B/AvB	0.182	37B/AvB	0.15	113	5868.24	114	3847.4	115	6574.27
1	Q9TV62	Myosin-4 OS=Sus scrofa GN=MYH4 PE=2 SV=1	30936	287893	1373	1373	114	114	103393	1	1	0	493.298	1476.87	3	1476.88	-0.0082	0	31.55	0.004	R	ILYADFK	Q				Cmpd 14657, AutoMSn(493.2979), 165.5 min (13229323981771806)	13A/AvB	-0.037	16A/AvB	0.019	27A/AvB	0.369	29A/AvB	-0.008	10B/AvB	0.5	21B/AvB	0.346	25B/AvB	-0.033	37B/AvB	0.187	113	24207	114	-1812.1	115	924.838
1	Q9TV62	Myosin-4 OS=Sus scrofa GN=MYH4 PE=2 SV=1	30936	287893	1373	1373	114	114	103395	1	1	0	493.298	1476.87	3	1476.88	-0.0081	0	24.73	0.0048	R	ILYADFK	Q				Cmpd 14803, AutoMSn(493.2980), 167.1 min (13229323981772098)	13A/AvB	-0.058	16A/AvB	-0.002	27A/AvB	0.16	29A/AvB	0.151	10B/AvB	0.79	21B/AvB	0.107	25B/AvB	-0.013	37B/AvB	0.116	113	15323.2	114	-1134.63	115	-30.1438
1	Q9TV62	Myosin-4 OS=Sus scrofa GN=MYH4 PE=2 SV=1	30936	287893	1373	1373	114	114	103398	1	1	0	493.298	1476.87	3	1476.88	-0.0079	0	22.05	0.021	R	ILYADFK	Q				Cmpd 14705, AutoMSn(493.2980), 163.3 min (13229323981820103)	13A/AvB	0.22	16A/AvB	0.316	27A/AvB	0.288	29A/AvB	0.238	10B/AvB	0.29	21B/AvB	0.281	25B/AvB	0.164	37B/AvB	0.266	113	31383.6	114	23831.3	115	34287
1	Q9TV62	Myosin-4 OS=Sus scrofa GN=MYH4 PE=2 SV=1	30936	287893	1373	1373	114	114	103400	1	1	0	493.298	1476.87	3	1476.88	-0.0076	0	24.69	0.0071	R	ILYADFK	Q				Cmpd 14759, AutoMSn(493.2981), 163.9 min (13229323981820211)	13A/AvB	0.187	16A/AvB	0.155	27A/AvB	0.209	29A/AvB	0.22	10B/AvB	0.27	21B/AvB	0.252	25B/AvB	0.178	37B/AvB	0.299	113	73951.6	114	51181.7	115	42541.2
1	Q9TV62	Myosin-4 OS=Sus scrofa GN=MYH4 PE=2 SV=1	30936	287893	1373	1373	114	114	103402	1	1	0	493.298	1476.87	3	1476.88	-0.0074	0	23.14	0.0069	R	ILYADFK	Q				Cmpd 14667, AutoMSn(493.2982), 165.8 min (13229323981722737)	13A/AvB	0.226	16A/AvB	0.202	27A/AvB	0.212	29A/AvB	0.302	10B/AvB	0.322	21B/AvB	0.297	25B/AvB	0.184	37B/AvB	0.198	113	4167.58	114	2932.96	115	2617
1	Q9TV62	Myosin-4 OS=Sus scrofa GN=MYH4 PE=2 SV=1	30936	287893	1373	1373	114	114	103404	1	1	0	493.298	1476.87	3	1476.88	-0.0072	0	21.98	0.024	R	ILYADFK	Q				Cmpd 14455, AutoMSn(493.2982), 161.5 min (13229323981868264)	13A/AvB	0.188	16A/AvB	0.209	27A/AvB	0.244	29A/AvB	0.166	10B/AvB	0.303	21B/AvB	0.251	25B/AvB	0.169	37B/AvB	0.276	113	20947.6	114	12974	115	14409.6
1	Q9TV62	Myosin-4 OS=Sus scrofa GN=MYH4 PE=2 SV=1	30936	287893	1373	1373	114	114	103405	1	1	0	493.298	1476.87	3	1476.88	-0.0067	0	24.16	0.0071	R	ILYADFK	Q				Cmpd 14729, AutoMSn(493.2984), 166.3 min (13229323981771950)	13A/AvB	-0.034	16A/AvB	-0.011	27A/AvB	0.428	29A/AvB	-0.009	10B/AvB	0.456	21B/AvB	0.381	25B/AvB	-0.037	37B/AvB	0.201	113	33027.7	114	-2431.44	115	-764.295
1	Q9TV62	Myosin-4 OS=Sus scrofa GN=MYH4 PE=2 SV=1	30936	287893	1373	1373	114	114	103407	1	1	0	493.298	1476.87	3	1476.88	-0.0065	0	22.58	0.0079	R	ILYADFK	Q				Cmpd 14901, AutoMSn(493.2985), 166.6 min (13229323981558418)	13A/AvB	0.186	16A/AvB	0.219	27A/AvB	0.201	29A/AvB	0.248	10B/AvB	0.223	21B/AvB	0.254	25B/AvB	0.19	37B/AvB	0.334	113	17447.3	114	14544.1	115	17120.3
1	Q9TV62	Myosin-4 OS=Sus scrofa GN=MYH4 PE=2 SV=1	30936	287893	1373	1373	114	114	103408	1	1	0	493.298	1476.87	3	1476.88	-0.0064	0	20.36	0.012	R	ILYADFK	Q				Cmpd 14563, AutoMSn(493.2985), 162.7 min (13229323981868480)	13A/AvB	0.176	16A/AvB	0.221	27A/AvB	0.256	29A/AvB	0.265	10B/AvB	0.273	21B/AvB	0.274	25B/AvB	0.138	37B/AvB	0.315	113	15426.5	114	9937.62	115	12506.6
1	Q9TV62	Myosin-4 OS=Sus scrofa GN=MYH4 PE=2 SV=1	30936	287893	1373	1373	114	114	103410	1	1	0	493.299	1476.87	3	1476.88	-0.0059	0	24.64	0.0091	R	ILYADFK	Q				Cmpd 14490, AutoMSn(493.2987), 161.9 min (13229323981868334)	13A/AvB	0.15	16A/AvB	0.151	27A/AvB	0.211	29A/AvB	0.214	10B/AvB	0.278	21B/AvB	0.216	25B/AvB	0.198	37B/AvB	0.308	113	60785.9	114	32777.1	115	32935.4
1	Q9TV62	Myosin-4 OS=Sus scrofa GN=MYH4 PE=2 SV=1	30936	287893	1373	1373	114	114	103411	1	1	0	493.299	1476.87	3	1476.88	-0.0058	0	16.62	0.028	R	ILYADFK	Q				Cmpd 14740, AutoMSn(493.2987), 166.6 min (13229323981722883)	13A/AvB	0.182	16A/AvB	0.612	27A/AvB	0.367	29A/AvB	0.096	10B/AvB	0.294	21B/AvB	0.23	25B/AvB	0.16	37B/AvB	0.316	113	1635.04	114	1014.36	115	3403.81
1	Q9TV62	Myosin-4 OS=Sus scrofa GN=MYH4 PE=2 SV=1	30936	287893	1373	1373	114	114	103565	1	1	0	495.615	1483.82	3	1483.83	-0.0101	0	33.93	0.0007	R	QLEEETK	A				Cmpd 6481, AutoMSn(495.6154), 71.4 min (13229323981803655)	13A/AvB	0.582	16A/AvB	0.494	27A/AvB	0.234	29A/AvB	0.208	10B/AvB	0.356	21B/AvB	0.312	25B/AvB	0.144	37B/AvB	0.188	113	80373.9	114	131574	115	111604
1	Q9TV62	Myosin-4 OS=Sus scrofa GN=MYH4 PE=2 SV=1	30936	287893	1373	1373	114	114	103566	1	1	0	495.615	1483.82	3	1483.83	-0.01	0	32.54	0.00089	R	QLEEETK	A				Cmpd 6132, AutoMSn(495.6154), 68.6 min (13229323981851618)	13A/AvB	0.273	16A/AvB	0.376	27A/AvB	0.269	29A/AvB	0.217	10B/AvB	0.263	21B/AvB	0.356	25B/AvB	0.182	37B/AvB	0.199	113	100417	114	104169	115	143751
1	Q9TV62	Myosin-4 OS=Sus scrofa GN=MYH4 PE=2 SV=1	30936	287893	1373	1373	114	114	103567	1	1	0	495.616	1483.83	3	1483.83	-0.0093	0	32.21	0.0011	R	QLEEETK	A				Cmpd 6700, AutoMSn(495.6156), 74.2 min (13229323981542016)	13A/AvB	0.614	16A/AvB	0.559	27A/AvB	0.263	29A/AvB	0.202	10B/AvB	0.382	21B/AvB	0.317	25B/AvB	0.117	37B/AvB	0.184	113	63349.7	114	101822	115	92610.8
1	Q9TV62	Myosin-4 OS=Sus scrofa GN=MYH4 PE=2 SV=1	30936	287893	1373	1373	114	114	103568	1	1	0	495.616	1483.83	3	1483.83	-0.0091	0	18.21	0.023	R	QLEEETK	A				Cmpd 6754, AutoMSn(495.6157), 75.8 min (13229323981706911)	13A/AvB	0.462	16A/AvB	0.509	27A/AvB	0.252	29A/AvB	0.189	10B/AvB	0.364	21B/AvB	0.29	25B/AvB	0.129	37B/AvB	0.216	113	25089.9	114	31809.4	115	35028.7
1	Q9TV62	Myosin-4 OS=Sus scrofa GN=MYH4 PE=2 SV=1	30936	287893	1373	1373	114	114	103569	1	1	0	495.616	1483.83	3	1483.83	-0.0088	0	20.18	0.013	R	QLEEETK	A				Cmpd 6749, AutoMSn(495.6158), 75.7 min (13229323981755990)	13A/AvB	0.867	16A/AvB	1.738	27A/AvB	0.839	29A/AvB	-0.011	10B/AvB	0.591	21B/AvB	0.117	25B/AvB	-0.031	37B/AvB	0.324	113	33307.6	114	48851.4	115	97940
1	Q9TV62	Myosin-4 OS=Sus scrofa GN=MYH4 PE=2 SV=1	30936	287893	1373	1373	114	114	103570	1	1	0	742.92	1483.83	2	1483.83	-0.0087	0	23.08	0.0068	R	QLEEETK	A				Cmpd 6754, AutoMSn(742.9201), 75.7 min (13229323981756000)	13A/AvB	0.32	16A/AvB	0.031	27A/AvB	0	29A/AvB	0	10B/AvB	0.177	21B/AvB	0.699	25B/AvB	-0.029	37B/AvB	0.153	113	5268.08	114	9524.43	115	920.893
1	Q9TV62	Myosin-4 OS=Sus scrofa GN=MYH4 PE=2 SV=1	30936	287893	1373	1373	114	114	103571	1	1	0	742.92	1483.83	2	1483.83	-0.0085	0	19.97	0.013	R	QLEEETK	A				Cmpd 6477, AutoMSn(742.9202), 71.3 min (13229323981803647)	13A/AvB	0.227	16A/AvB	0.257	27A/AvB	0.262	29A/AvB	0.234	10B/AvB	0.209	21B/AvB	0.375	25B/AvB	0.174	37B/AvB	0.243	113	13568.8	114	14752.9	115	16748.6
1	Q9TV62	Myosin-4 OS=Sus scrofa GN=MYH4 PE=2 SV=1	30936	287893	1373	1373	114	114	103572	1	1	0	742.92	1483.83	2	1483.83	-0.0081	0	22.6	0.0076	R	QLEEETK	A				Cmpd 6138, AutoMSn(742.9204), 68.6 min (13229323981851630)	13A/AvB	0.199	16A/AvB	0.292	27A/AvB	0.201	29A/AvB	0.246	10B/AvB	0.208	21B/AvB	0.349	25B/AvB	0.197	37B/AvB	0.246	113	29018.7	114	27694.9	115	40656.1
1	Q9TV62	Myosin-4 OS=Sus scrofa GN=MYH4 PE=2 SV=1	30936	287893	1373	1373	114	114	103573	1	1	0	742.921	1483.83	2	1483.83	-0.0073	0	25.99	0.0037	R	QLEEETK	A				Cmpd 6695, AutoMSn(742.9208), 74.2 min (13229323981542006)	13A/AvB	0.236	16A/AvB	0.206	27A/AvB	0.188	29A/AvB	0.245	10B/AvB	0.251	21B/AvB	0.353	25B/AvB	0.153	37B/AvB	0.242	113	12607.5	114	11857	115	10337.9
1	Q9TV62	Myosin-4 OS=Sus scrofa GN=MYH4 PE=2 SV=1	30936	287893	1373	1373	114	114	103625	1	1	0	497.255	1488.74	3	1488.75	-0.0057	0	19.75	0.037	K	EQDTSAHLER	M				Cmpd 4669, AutoMSn(497.2545), 51.7 min (13229323981537954)	13A/AvB	0.21	16A/AvB	0.593	27A/AvB	0.259	29A/AvB	0.187	10B/AvB	0.26	21B/AvB	0.464	25B/AvB	0.112	37B/AvB	0.164	113	41700.4	114	33706.5	115	95200.4
1	Q9TV62	Myosin-4 OS=Sus scrofa GN=MYH4 PE=2 SV=1	30936	287893	1373	1373	114	114	103627	1	1	0	497.255	1488.74	3	1488.75	-0.0036	0	24	0.015	K	EQDTSAHLER	M				Cmpd 4298, AutoMSn(497.2552), 47.4 min (13229323981799289)	13A/AvB	0.311	16A/AvB	0.595	27A/AvB	0.291	29A/AvB	0.168	10B/AvB	0.309	21B/AvB	0.47	25B/AvB	0.1	37B/AvB	0.121	113	81193.6	114	81651.6	115	156373
1	Q9TV62	Myosin-4 OS=Sus scrofa GN=MYH4 PE=2 SV=1	30936	287893	1373	1373	114	114	103628	1	1	0	497.256	1488.75	3	1488.75	-0.0023	0	20.26	0.037	K	EQDTSAHLER	M				Cmpd 5007, AutoMSn(497.2557), 56.1 min (13229323981752506)	13A/AvB	-0.079	16A/AvB	1.307	27A/AvB	0.609	29A/AvB	-0.013	10B/AvB	0.71	21B/AvB	0.127	25B/AvB	-0.002	37B/AvB	0.166	113	36468.4	114	-4059.72	115	67173.7
1	Q9TV62	Myosin-4 OS=Sus scrofa GN=MYH4 PE=2 SV=1	30936	287893	1373	1373	114	114	103902	1	1	0	501.296	1500.87	3	1500.88	-0.0105	0	14.47	0.044	K	VGNEFVTK	G				Cmpd 9932, AutoMSn(501.2958), 110.4 min (13229323981548480)	13A/AvB	0.244	16A/AvB	0.367	27A/AvB	0.278	29A/AvB	0.173	10B/AvB	0.378	21B/AvB	0.395	25B/AvB	0.101	37B/AvB	0.125	113	19331	114	12476.6	115	18767.6
1	Q9TV62	Myosin-4 OS=Sus scrofa GN=MYH4 PE=2 SV=1	30936	287893	1373	1373	114	114	103904	1	1	0	501.296	1500.87	3	1500.88	-0.0097	0	31.81	0.0025	K	VGNEFVTK	G				Cmpd 9567, AutoMSn(501.2961), 106.4 min (13229323981858488)	13A/AvB	0.21	16A/AvB	0.314	27A/AvB	0.279	29A/AvB	0.244	10B/AvB	0.263	21B/AvB	0.308	25B/AvB	0.17	37B/AvB	0.259	113	71726	114	57245.4	115	85629.6
1	Q9TV62	Myosin-4 OS=Sus scrofa GN=MYH4 PE=2 SV=1	30936	287893	1373	1373	114	114	103905	1	1	0	501.296	1500.87	3	1500.88	-0.0093	0	24.74	0.0063	K	VGNEFVTK	G				Cmpd 9810, AutoMSn(501.2962), 108.3 min (13229323981810313)	13A/AvB	0.227	16A/AvB	0.285	27A/AvB	0.257	29A/AvB	0.239	10B/AvB	0.334	21B/AvB	0.28	25B/AvB	0.13	37B/AvB	0.256	113	75831.4	114	51418.8	115	64666.9
1	Q9TV62	Myosin-4 OS=Sus scrofa GN=MYH4 PE=2 SV=1	30936	287893	1373	1373	114	114	103907	1	1	0	751.441	1500.87	2	1500.88	-0.0089	0	16.71	0.043	K	VGNEFVTK	G				Cmpd 9583, AutoMSn(751.4409), 106.6 min (13229323981858520)	13A/AvB	0.258	16A/AvB	0.277	27A/AvB	0.273	29A/AvB	0.278	10B/AvB	0.285	21B/AvB	0.335	25B/AvB	0.142	37B/AvB	0.238	113	23964.2	114	21752.4	115	23358
1	Q9TV62	Myosin-4 OS=Sus scrofa GN=MYH4 PE=2 SV=1	30936	287893	1373	1373	114	114	103909	1	1	0	501.297	1500.87	3	1500.88	-0.0083	0	14.91	0.04	K	VGNEFVTK	G				Cmpd 9876, AutoMSn(501.2966), 111.1 min (13229323981762244)	13A/AvB	0.014	16A/AvB	0.819	27A/AvB	0.657	29A/AvB	-0.013	10B/AvB	0.72	21B/AvB	0.328	25B/AvB	-0.048	37B/AvB	0	113	17037.6	114	337.07	115	19395.4
1	Q9TV62	Myosin-4 OS=Sus scrofa GN=MYH4 PE=2 SV=1	30936	287893	1373	1373	114	114	103910	1	1	0	751.441	1500.87	2	1500.88	-0.0081	0	14.48	0.044	K	VGNEFVTK	G				Cmpd 9817, AutoMSn(751.4413), 108.4 min (13229323981810327)	13A/AvB	0.243	16A/AvB	0.301	27A/AvB	0.256	29A/AvB	0.254	10B/AvB	0.241	21B/AvB	0.362	25B/AvB	0.149	37B/AvB	0.249	113	13227.6	114	13352.9	115	16511.9
1	Q9TV62	Myosin-4 OS=Sus scrofa GN=MYH4 PE=2 SV=1	30936	287893	1373	1373	114	114	103911	1	1	0	501.297	1500.87	3	1500.88	-0.0077	0	21.83	0.009	K	VGNEFVTK	G				Cmpd 9967, AutoMSn(501.2967), 110.8 min (13229323981548550)	13A/AvB	0.181	16A/AvB	0.32	27A/AvB	0.253	29A/AvB	0.213	10B/AvB	0.294	21B/AvB	0.309	25B/AvB	0.156	37B/AvB	0.24	113	32498.9	114	20026.3	115	35443.3
1	Q9TV62	Myosin-4 OS=Sus scrofa GN=MYH4 PE=2 SV=1	30936	287893	1373	1373	114	114	104949	1	1	0	511.64	1531.9	3	1531.91	-0.01	0	16.14	0.048	R	SLSTELFK	V				Cmpd 12894, AutoMSn(511.6396), 145.6 min (13229323981719191)	13A/AvB	0.285	16A/AvB	0.399	27A/AvB	0.179	29A/AvB	0.194	10B/AvB	0.35	21B/AvB	0.297	25B/AvB	0.087	37B/AvB	0.267	113	4547.34	114	3710.89	115	5189.62
1	Q9TV62	Myosin-4 OS=Sus scrofa GN=MYH4 PE=2 SV=1	30936	287893	1373	1373	114	114	104956	1	1	0	511.64	1531.9	3	1531.91	-0.0079	0	36.52	0.0021	R	SLSTELFK	V				Cmpd 12982, AutoMSn(511.6403), 143.9 min (13229323981816657)	13A/AvB	0.167	16A/AvB	0.229	27A/AvB	0.193	29A/AvB	0.198	10B/AvB	0.263	21B/AvB	0.241	25B/AvB	0.197	37B/AvB	0.299	113	96963.1	114	61740.4	115	84608.7
1	Q9TV62	Myosin-4 OS=Sus scrofa GN=MYH4 PE=2 SV=1	30936	287893	1373	1373	114	114	104957	1	1	0	766.957	1531.9	2	1531.91	-0.0077	0	27.21	0.013	R	SLSTELFK	V				Cmpd 13092, AutoMSn(766.9570), 147.6 min (13229323981768676)	13A/AvB	0.532	16A/AvB	-0.049	27A/AvB	0.443	29A/AvB	-0.01	10B/AvB	0.244	21B/AvB	0.472	25B/AvB	-0.042	37B/AvB	0.326	113	7090.1	114	15471	115	-1412.83
1	Q9TV62	Myosin-4 OS=Sus scrofa GN=MYH4 PE=2 SV=1	30936	287893	1373	1373	114	114	104959	1	1	0	766.957	1531.9	2	1531.91	-0.0076	0	37.74	0.0016	R	SLSTELFK	V				Cmpd 13067, AutoMSn(766.9570), 144.9 min (13229323981816827)	13A/AvB	0.173	16A/AvB	0.242	27A/AvB	0.231	29A/AvB	0.26	10B/AvB	0.269	21B/AvB	0.244	25B/AvB	0.199	37B/AvB	0.288	113	33153	114	21360.2	115	29826.4
1	Q9TV62	Myosin-4 OS=Sus scrofa GN=MYH4 PE=2 SV=1	30936	287893	1373	1373	114	114	104960	1	1	0	511.64	1531.9	3	1531.91	-0.0073	0	38.07	0.0015	R	SLSTELFK	V				Cmpd 13079, AutoMSn(511.6405), 145.0 min (13229323981816851)	13A/AvB	0.153	16A/AvB	0.193	27A/AvB	0.189	29A/AvB	0.229	10B/AvB	0.234	21B/AvB	0.262	25B/AvB	0.194	37B/AvB	0.309	113	87608.2	114	57259.6	115	72146
1	Q9TV62	Myosin-4 OS=Sus scrofa GN=MYH4 PE=2 SV=1	30936	287893	1373	1373	114	114	104961	1	1	0	511.641	1531.9	3	1531.91	-0.0072	0	28.07	0.015	R	SLSTELFK	V				Cmpd 12969, AutoMSn(511.6406), 146.4 min (13229323981719341)	13A/AvB	0.148	16A/AvB	0.253	27A/AvB	0.17	29A/AvB	0.15	10B/AvB	0.242	21B/AvB	0.26	25B/AvB	0.214	37B/AvB	0.284	113	7050.28	114	4298.73	115	7362.83
1	Q9TV62	Myosin-4 OS=Sus scrofa GN=MYH4 PE=2 SV=1	30936	287893	1373	1373	114	114	104962	1	1	0	511.641	1531.9	3	1531.91	-0.0072	0	27.2	0.018	R	SLSTELFK	V				Cmpd 13107, AutoMSn(511.6406), 146.3 min (13229323981554830)	13A/AvB	0.205	16A/AvB	0.319	27A/AvB	0.241	29A/AvB	0.159	10B/AvB	0.307	21B/AvB	0.274	25B/AvB	0.185	37B/AvB	0.235	113	24064.4	114	16109.4	115	25012.7
1	Q9TV62	Myosin-4 OS=Sus scrofa GN=MYH4 PE=2 SV=1	30936	287893	1373	1373	114	114	104964	1	1	0	766.957	1531.9	2	1531.91	-0.0071	0	32.39	0.0055	R	SLSTELFK	V				Cmpd 13020, AutoMSn(766.9573), 146.8 min (13229323981768532)	13A/AvB	0.345	16A/AvB	1.413	27A/AvB	-0.022	29A/AvB	0.365	10B/AvB	0.526	21B/AvB	-0.037	25B/AvB	0.001	37B/AvB	0.511	113	8309.18	114	5453.41	115	22331.2
1	Q9TV62	Myosin-4 OS=Sus scrofa GN=MYH4 PE=2 SV=1	30936	287893	1373	1373	114	114	104965	1	1	0	766.957	1531.9	2	1531.91	-0.0071	0	37.8	0.0016	R	SLSTELFK	V				Cmpd 12994, AutoMSn(766.9573), 144.0 min (13229323981816681)	13A/AvB	0.19	16A/AvB	0.228	27A/AvB	0.195	29A/AvB	0.224	10B/AvB	0.285	21B/AvB	0.262	25B/AvB	0.191	37B/AvB	0.261	113	45196.1	114	30040.4	115	36083.5
1	Q9TV62	Myosin-4 OS=Sus scrofa GN=MYH4 PE=2 SV=1	30936	287893	1373	1373	114	114	104966	1	1	0	766.957	1531.9	2	1531.91	-0.007	0	34.29	0.0035	R	SLSTELFK	V				Cmpd 12786, AutoMSn(766.9574), 142.5 min (13229323981864926)	13A/AvB	0.151	16A/AvB	0.27	27A/AvB	0.188	29A/AvB	0.247	10B/AvB	0.24	21B/AvB	0.227	25B/AvB	0.219	37B/AvB	0.313	113	13610.3	114	8526.1	115	15264.7
1	Q9TV62	Myosin-4 OS=Sus scrofa GN=MYH4 PE=2 SV=1	30936	287893	1373	1373	114	114	104967	1	1	0	511.641	1531.9	3	1531.91	-0.007	0	38.82	0.0012	R	SLSTELFK	V				Cmpd 13006, AutoMSn(511.6407), 144.2 min (13229323981816705)	13A/AvB	0.183	16A/AvB	0.204	27A/AvB	0.199	29A/AvB	0.2	10B/AvB	0.244	21B/AvB	0.217	25B/AvB	0.211	37B/AvB	0.328	113	100753	114	75652.8	115	84312.7
1	Q9TV62	Myosin-4 OS=Sus scrofa GN=MYH4 PE=2 SV=1	30936	287893	1373	1373	114	114	104968	1	1	0	511.641	1531.9	3	1531.91	-0.0068	0	25.75	0.025	R	SLSTELFK	V				Cmpd 12995, AutoMSn(511.6407), 146.6 min (13229323981768482)	13A/AvB	-0.029	16A/AvB	1.576	27A/AvB	-0.001	29A/AvB	0.017	10B/AvB	0.633	21B/AvB	0.019	25B/AvB	-0.002	37B/AvB	0.351	113	26716.4	114	-1221.27	115	66543.7
1	Q9TV62	Myosin-4 OS=Sus scrofa GN=MYH4 PE=2 SV=1	30936	287893	1373	1373	114	114	104969	1	1	0	511.641	1531.9	3	1531.91	-0.0068	0	30.15	0.0092	R	SLSTELFK	V				Cmpd 13091, AutoMSn(511.6407), 147.6 min (13229323981768674)	13A/AvB	-0.021	16A/AvB	0.128	27A/AvB	0.006	29A/AvB	0.001	10B/AvB	0.25	21B/AvB	0.592	25B/AvB	-0.025	37B/AvB	0.183	113	80036.1	114	-6759.3	115	41045.8
1	Q9TV62	Myosin-4 OS=Sus scrofa GN=MYH4 PE=2 SV=1	30936	287893	1373	1373	114	114	104970	1	1	0	511.641	1531.9	3	1531.91	-0.0067	0	26.95	0.019	R	SLSTELFK	V				Cmpd 13125, AutoMSn(511.6408), 146.5 min (13229323981554866)	13A/AvB	0.18	16A/AvB	0.215	27A/AvB	0.176	29A/AvB	0.179	10B/AvB	0.282	21B/AvB	0.238	25B/AvB	0.183	37B/AvB	0.297	113	56692.1	114	36175	115	43147.7
1	Q9TV62	Myosin-4 OS=Sus scrofa GN=MYH4 PE=2 SV=1	30936	287893	1373	1373	114	114	104971	1	1	0	511.641	1531.9	3	1531.91	-0.0067	0	30.22	0.009	R	SLSTELFK	V				Cmpd 12701, AutoMSn(511.6407), 141.6 min (13229323981864756)	13A/AvB	0.146	16A/AvB	0.216	27A/AvB	0.189	29A/AvB	0.174	10B/AvB	0.291	21B/AvB	0.256	25B/AvB	0.178	37B/AvB	0.276	113	66111	114	33267.6	115	49259.7
1	Q9TV62	Myosin-4 OS=Sus scrofa GN=MYH4 PE=2 SV=1	30936	287893	1373	1373	114	114	104972	1	1	0	766.957	1531.9	2	1531.91	-0.0066	0	29.39	0.01	R	SLSTELFK	V				Cmpd 12981, AutoMSn(766.9575), 146.6 min (13229323981719365)	13A/AvB	0.144	16A/AvB	0.155	27A/AvB	0.203	29A/AvB	0.097	10B/AvB	0.221	21B/AvB	0.289	25B/AvB	0.184	37B/AvB	0.307	113	5410.69	114	3520.33	115	3792.25
1	Q9TV62	Myosin-4 OS=Sus scrofa GN=MYH4 PE=2 SV=1	30936	287893	1373	1373	114	114	104973	1	1	0	511.641	1531.9	3	1531.91	-0.0066	0	37.85	0.0015	R	SLSTELFK	V				Cmpd 13052, AutoMSn(511.6408), 147.4 min (13229323981719507)	13A/AvB	0.167	16A/AvB	0.185	27A/AvB	0.208	29A/AvB	0.213	10B/AvB	0.226	21B/AvB	0.256	25B/AvB	0.174	37B/AvB	0.343	113	34714.1	114	25640.4	115	28331.1
1	Q9TV62	Myosin-4 OS=Sus scrofa GN=MYH4 PE=2 SV=1	30936	287893	1373	1373	114	114	104974	1	1	0	511.641	1531.9	3	1531.91	-0.0066	0	29.64	0.01	R	SLSTELFK	V				Cmpd 13019, AutoMSn(511.6408), 146.8 min (13229323981768530)	13A/AvB	-0.027	16A/AvB	-0.001	27A/AvB	0.005	29A/AvB	-0.001	10B/AvB	0.362	21B/AvB	0.513	25B/AvB	-0.022	37B/AvB	0.147	113	110803	114	-8200.13	115	-437.578
1	Q9TV62	Myosin-4 OS=Sus scrofa GN=MYH4 PE=2 SV=1	30936	287893	1373	1373	114	114	104975	1	1	0	511.641	1531.9	3	1531.91	-0.0065	0	23.51	0.042	R	SLSTELFK	V				Cmpd 13227, AutoMSn(511.6408), 147.7 min (13229323981555070)	13A/AvB	0.161	16A/AvB	0.213	27A/AvB	0.191	29A/AvB	0.209	10B/AvB	0.249	21B/AvB	0.255	25B/AvB	0.176	37B/AvB	0.32	113	41292.9	114	26731.4	115	35355.4
1	Q9TV62	Myosin-4 OS=Sus scrofa GN=MYH4 PE=2 SV=1	30936	287893	1373	1373	114	114	104976	1	1	0	766.958	1531.9	2	1531.91	-0.0065	0	35.77	0.0025	R	SLSTELFK	V				Cmpd 12704, AutoMSn(766.9576), 141.6 min (13229323981864762)	13A/AvB	0.221	16A/AvB	0.247	27A/AvB	0.197	29A/AvB	0.166	10B/AvB	0.271	21B/AvB	0.306	25B/AvB	0.142	37B/AvB	0.28	113	15506.6	114	12662.9	115	14103.1
1	Q9TV62	Myosin-4 OS=Sus scrofa GN=MYH4 PE=2 SV=1	30936	287893	1373	1373	114	114	104977	1	1	0	766.958	1531.9	2	1531.91	-0.0064	0	38.33	0.0014	R	SLSTELFK	V				Cmpd 13016, AutoMSn(766.9576), 147.0 min (13229323981719435)	13A/AvB	0.205	16A/AvB	0.245	27A/AvB	0.172	29A/AvB	0.245	10B/AvB	0.257	21B/AvB	0.229	25B/AvB	0.214	37B/AvB	0.3	113	14238.3	114	11369.4	115	13585.3
1	Q9TV62	Myosin-4 OS=Sus scrofa GN=MYH4 PE=2 SV=1	30936	287893	1373	1373	114	114	104978	1	1	0	766.958	1531.9	2	1531.91	-0.0061	0	34.67	0.0032	R	SLSTELFK	V				Cmpd 13131, AutoMSn(766.9578), 146.6 min (13229323981554878)	13A/AvB	0.201	16A/AvB	0.226	27A/AvB	0.176	29A/AvB	0.179	10B/AvB	0.252	21B/AvB	0.308	25B/AvB	0.18	37B/AvB	0.26	113	26401.1	114	20985	115	23667.6
1	Q9TV62	Myosin-4 OS=Sus scrofa GN=MYH4 PE=2 SV=1	30936	287893	1373	1373	114	114	104980	1	1	0	766.958	1531.9	2	1531.91	-0.0059	0	44.76	0.00031	R	SLSTELFK	V				Cmpd 12714, AutoMSn(766.9579), 141.7 min (13229323981864782)	13A/AvB	0.176	16A/AvB	0.234	27A/AvB	0.217	29A/AvB	0.218	10B/AvB	0.237	21B/AvB	0.247	25B/AvB	0.221	37B/AvB	0.296	113	36486.9	114	27083.9	115	36063.6
1	Q9TV62	Myosin-4 OS=Sus scrofa GN=MYH4 PE=2 SV=1	30936	287893	1373	1373	114	114	104981	1	1	0	511.641	1531.9	3	1531.91	-0.0058	0	41.14	0.0007	R	SLSTELFK	V				Cmpd 12980, AutoMSn(511.6410), 146.6 min (13229323981719363)	13A/AvB	0.192	16A/AvB	0.232	27A/AvB	0.162	29A/AvB	0.187	10B/AvB	0.261	21B/AvB	0.273	25B/AvB	0.173	37B/AvB	0.293	113	19869.3	114	14611.5	115	17673.7
1	Q9TV62	Myosin-4 OS=Sus scrofa GN=MYH4 PE=2 SV=1	30936	287893	1373	1373	114	114	104982	1	1	0	766.958	1531.9	2	1531.91	-0.0056	0	37.92	0.0015	R	SLSTELFK	V				Cmpd 13203, AutoMSn(766.9580), 147.4 min (13229323981555022)	13A/AvB	0.18	16A/AvB	0.25	27A/AvB	0.219	29A/AvB	0.21	10B/AvB	0.27	21B/AvB	0.224	25B/AvB	0.2	37B/AvB	0.306	113	34172.5	114	22765.9	115	31556.9
1	Q9TV62	Myosin-4 OS=Sus scrofa GN=MYH4 PE=2 SV=1	30936	287893	1373	1373	114	114	104983	1	1	0	511.641	1531.9	3	1531.91	-0.0053	0	27.61	0.0028	R	SLSTELFK	V				Cmpd 13182, AutoMSn(511.6412), 147.1 min (13229323981554980)	13A/AvB	0.163	16A/AvB	0.2	27A/AvB	0.195	29A/AvB	0.207	10B/AvB	0.243	21B/AvB	0.24	25B/AvB	0.192	37B/AvB	0.325	113	105485	114	70827.4	115	86839.3
1	Q9TV62	Myosin-4 OS=Sus scrofa GN=MYH4 PE=2 SV=1	30936	287893	1373	1373	114	114	104984	1	1	0	511.641	1531.9	3	1531.91	-0.005	0	38.92	0.0011	R	SLSTELFK	V				Cmpd 12713, AutoMSn(511.6413), 141.7 min (13229323981864780)	13A/AvB	0.162	16A/AvB	0.204	27A/AvB	0.182	29A/AvB	0.188	10B/AvB	0.263	21B/AvB	0.226	25B/AvB	0.197	37B/AvB	0.313	113	108831	114	66927.1	115	84330
1	Q9TV62	Myosin-4 OS=Sus scrofa GN=MYH4 PE=2 SV=1	30936	287893	1373	1373	114	114	104985	1	1	0	511.641	1531.9	3	1531.91	-0.0049	0	38.03	0.0014	R	SLSTELFK	V				Cmpd 12785, AutoMSn(511.6413), 142.5 min (13229323981864924)	13A/AvB	0.165	16A/AvB	0.22	27A/AvB	0.199	29A/AvB	0.209	10B/AvB	0.231	21B/AvB	0.234	25B/AvB	0.185	37B/AvB	0.35	113	73805.8	114	52822.3	115	70215.8
1	Q9TV62	Myosin-4 OS=Sus scrofa GN=MYH4 PE=2 SV=1	30936	287893	1373	1373	114	114	104986	1	1	0	511.642	1531.9	3	1531.91	-0.0045	0	38.87	0.0012	R	SLSTELFK	V				Cmpd 13155, AutoMSn(511.6415), 146.8 min (13229323981554926)	13A/AvB	0.169	16A/AvB	0.197	27A/AvB	0.166	29A/AvB	0.227	10B/AvB	0.246	21B/AvB	0.237	25B/AvB	0.198	37B/AvB	0.319	113	91351.3	114	62984.2	115	73433.8
1	Q9TV62	Myosin-4 OS=Sus scrofa GN=MYH4 PE=2 SV=1	30936	287893	1373	1373	114	114	105749	1	1	0	778.931	1555.85	2	1555.86	-0.0079	0	34.5	0.0017	R	TEELEEAK	K				Cmpd 8625, AutoMSn(778.9311), 95.2 min (13229323981807943)	13A/AvB	0.222	16A/AvB	0.243	27A/AvB	0.271	29A/AvB	0.222	10B/AvB	0.292	21B/AvB	0.296	25B/AvB	0.155	37B/AvB	0.256	113	18443.3	114	14011.8	115	15333.3
1	Q9TV62	Myosin-4 OS=Sus scrofa GN=MYH4 PE=2 SV=1	30936	287893	1373	1373	114	114	105750	1	1	0	519.623	1555.85	3	1555.86	-0.0076	0	30.48	0.0072	R	TEELEEAK	K				Cmpd 8405, AutoMSn(519.6232), 93.6 min (13229323981856164)	13A/AvB	0.228	16A/AvB	0.241	27A/AvB	0.232	29A/AvB	0.265	10B/AvB	0.277	21B/AvB	0.292	25B/AvB	0.179	37B/AvB	0.252	113	134022	114	109977	115	116367
1	Q9TV62	Myosin-4 OS=Sus scrofa GN=MYH4 PE=2 SV=1	30936	287893	1373	1373	114	114	105751	1	1	0	519.623	1555.85	3	1555.86	-0.0074	0	33.16	0.0039	R	TEELEEAK	K				Cmpd 8618, AutoMSn(519.6233), 95.1 min (13229323981807929)	13A/AvB	0.24	16A/AvB	0.289	27A/AvB	0.246	29A/AvB	0.225	10B/AvB	0.279	21B/AvB	0.31	25B/AvB	0.187	37B/AvB	0.224	113	70043.2	114	60097.9	115	72498.7
1	Q9TV62	Myosin-4 OS=Sus scrofa GN=MYH4 PE=2 SV=1	30936	287893	1373	1373	114	114	105752	1	1	0	778.931	1555.85	2	1555.86	-0.0073	0	16.44	0.029	R	TEELEEAK	K				Cmpd 8758, AutoMSn(778.9313), 98.5 min (13229323981710919)	13A/AvB	0.398	16A/AvB	0.253	27A/AvB	0.236	29A/AvB	0.297	10B/AvB	0.279	21B/AvB	0.369	25B/AvB	0.126	37B/AvB	0.226	113	3335	114	4764.79	115	3029.88
1	Q9TV62	Myosin-4 OS=Sus scrofa GN=MYH4 PE=2 SV=1	30936	287893	1373	1373	114	114	105753	1	1	0	778.931	1555.85	2	1555.86	-0.0073	0	37.97	0.00076	R	TEELEEAK	K				Cmpd 8696, AutoMSn(778.9313), 96.0 min (13229323981808085)	13A/AvB	0.209	16A/AvB	0.172	27A/AvB	0.211	29A/AvB	0.292	10B/AvB	0.228	21B/AvB	0.318	25B/AvB	0.186	37B/AvB	0.268	113	18156.1	114	16636.9	115	13657.7
1	Q9TV62	Myosin-4 OS=Sus scrofa GN=MYH4 PE=2 SV=1	30936	287893	1373	1373	114	114	105754	1	1	0	519.623	1555.85	3	1555.86	-0.0072	0	29.86	0.0043	R	TEELEEAK	K				Cmpd 8745, AutoMSn(519.6233), 98.3 min (13229323981710893)	13A/AvB	0.234	16A/AvB	0.267	27A/AvB	0.171	29A/AvB	0.232	10B/AvB	0.25	21B/AvB	0.376	25B/AvB	0.164	37B/AvB	0.211	113	15636.8	114	14694.6	115	16738.3
1	Q9TV62	Myosin-4 OS=Sus scrofa GN=MYH4 PE=2 SV=1	30936	287893	1373	1373	114	114	105755	1	1	0	519.623	1555.85	3	1555.86	-0.0072	0	23.63	0.007	R	TEELEEAK	K				Cmpd 8747, AutoMSn(519.6233), 98.3 min (13229323981759986)	13A/AvB	0.456	16A/AvB	2.232	27A/AvB	0.032	29A/AvB	-0.002	10B/AvB	0.49	21B/AvB	0.153	25B/AvB	-0.01	37B/AvB	0.368	113	22510	114	20958.3	115	102651
1	Q9TV62	Myosin-4 OS=Sus scrofa GN=MYH4 PE=2 SV=1	30936	287893	1373	1373	114	114	105756	1	1	0	778.931	1555.85	2	1555.86	-0.0072	0	35.7	0.0013	R	TEELEEAK	K				Cmpd 8412, AutoMSn(778.9314), 93.7 min (13229323981856178)	13A/AvB	0.189	16A/AvB	0.251	27A/AvB	0.221	29A/AvB	0.264	10B/AvB	0.27	21B/AvB	0.323	25B/AvB	0.136	37B/AvB	0.272	113	33100.3	114	23162.2	115	30773.4
1	Q9TV62	Myosin-4 OS=Sus scrofa GN=MYH4 PE=2 SV=1	30936	287893	1373	1373	114	114	105757	1	1	0	778.932	1555.85	2	1555.86	-0.0071	0	14.71	0.042	R	TEELEEAK	K				Cmpd 8770, AutoMSn(778.9314), 98.5 min (13229323981760032)	13A/AvB	-0.094	16A/AvB	2.027	27A/AvB	0	29A/AvB	-0.001	10B/AvB	0.72	21B/AvB	-0.106	25B/AvB	0.002	37B/AvB	0.384	113	5960.31	114	-780.895	115	16785.5
1	Q9TV62	Myosin-4 OS=Sus scrofa GN=MYH4 PE=2 SV=1	30936	287893	1373	1373	114	114	105758	1	1	0	778.932	1555.85	2	1555.86	-0.0071	0	23.01	0.011	R	TEELEEAK	K				Cmpd 8335, AutoMSn(778.9315), 92.9 min (13229323981856024)	13A/AvB	0.191	16A/AvB	0.3	27A/AvB	0.227	29A/AvB	0.213	10B/AvB	0.269	21B/AvB	0.325	25B/AvB	0.18	37B/AvB	0.227	113	31895.5	114	22625.7	115	35666.5
1	Q9TV62	Myosin-4 OS=Sus scrofa GN=MYH4 PE=2 SV=1	30936	287893	1373	1373	114	114	105759	1	1	0	519.623	1555.85	3	1555.86	-0.007	0	32.79	0.0019	R	TEELEEAK	K				Cmpd 8790, AutoMSn(519.6234), 97.6 min (13229323981546196)	13A/AvB	0.248	16A/AvB	0.304	27A/AvB	0.235	29A/AvB	0.259	10B/AvB	0.257	21B/AvB	0.345	25B/AvB	0.165	37B/AvB	0.233	113	35904.5	114	34623.5	115	42355.8
1	Q9TV62	Myosin-4 OS=Sus scrofa GN=MYH4 PE=2 SV=1	30936	287893	1373	1373	114	114	105760	1	1	0	519.624	1555.85	3	1555.86	-0.0068	0	37.3	0.0015	R	TEELEEAK	K				Cmpd 8819, AutoMSn(519.6235), 99.1 min (13229323981760130)	13A/AvB	0.411	16A/AvB	1.433	27A/AvB	0.939	29A/AvB	-0.015	10B/AvB	0.488	21B/AvB	0.064	25B/AvB	-0.052	37B/AvB	0.5	113	37022.7	114	31177	115	108750
1	Q9TV62	Myosin-4 OS=Sus scrofa GN=MYH4 PE=2 SV=1	30936	287893	1373	1373	114	114	105761	1	1	0	519.624	1555.85	3	1555.86	-0.0068	0	41.12	0.00062	R	TEELEEAK	K				Cmpd 8689, AutoMSn(519.6235), 95.9 min (13229323981808071)	13A/AvB	0.219	16A/AvB	0.224	27A/AvB	0.22	29A/AvB	0.231	10B/AvB	0.268	21B/AvB	0.305	25B/AvB	0.177	37B/AvB	0.25	113	101571	114	83073.3	115	84657.3
1	Q9TV62	Myosin-4 OS=Sus scrofa GN=MYH4 PE=2 SV=1	30936	287893	1373	1373	114	114	105762	1	1	0	778.932	1555.85	2	1555.86	-0.0068	0	30.85	0.0013	R	TEELEEAK	K				Cmpd 8831, AutoMSn(778.9316), 99.3 min (13229323981711065)	13A/AvB	0.328	16A/AvB	0.267	27A/AvB	0.25	29A/AvB	0.311	10B/AvB	0.314	21B/AvB	0.37	25B/AvB	0.102	37B/AvB	0.214	113	3833.7	114	4004.94	115	3258.83
1	Q9TV62	Myosin-4 OS=Sus scrofa GN=MYH4 PE=2 SV=1	30936	287893	1373	1373	114	114	105763	1	1	0	778.932	1555.85	2	1555.86	-0.0068	0	24.67	0.0049	R	TEELEEAK	K				Cmpd 8797, AutoMSn(778.9316), 97.7 min (13229323981546210)	13A/AvB	0.128	16A/AvB	0.251	27A/AvB	0.175	29A/AvB	0.154	10B/AvB	0.347	21B/AvB	0.301	25B/AvB	0.193	37B/AvB	0.159	113	11549.4	114	4261.56	115	8350.82
1	Q9TV62	Myosin-4 OS=Sus scrofa GN=MYH4 PE=2 SV=1	30936	287893	1373	1373	114	114	105764	1	1	0	778.932	1555.85	2	1555.86	-0.0068	0	34	0.0011	R	TEELEEAK	K				Cmpd 8869, AutoMSn(778.9316), 98.5 min (13229323981546354)	13A/AvB	0.224	16A/AvB	0.309	27A/AvB	0.206	29A/AvB	0.263	10B/AvB	0.201	21B/AvB	0.376	25B/AvB	0.168	37B/AvB	0.254	113	6974.23	114	7769.9	115	10716.6
1	Q9TV62	Myosin-4 OS=Sus scrofa GN=MYH4 PE=2 SV=1	30936	287893	1373	1373	114	114	105765	1	1	0	519.624	1555.85	3	1555.86	-0.0067	0	34.95	0.00057	R	TEELEEAK	K				Cmpd 8816, AutoMSn(519.6236), 99.1 min (13229323981711035)	13A/AvB	0.264	16A/AvB	0.241	27A/AvB	0.27	29A/AvB	0.22	10B/AvB	0.258	21B/AvB	0.271	25B/AvB	0.198	37B/AvB	0.273	113	25716.2	114	26319.7	115	23982.9
1	Q9TV62	Myosin-4 OS=Sus scrofa GN=MYH4 PE=2 SV=1	30936	287893	1373	1373	114	114	105766	1	1	0	519.624	1555.85	3	1555.86	-0.0065	0	33.6	0.0038	R	TEELEEAK	K				Cmpd 8862, AutoMSn(519.6236), 98.4 min (13229323981546340)	13A/AvB	0.232	16A/AvB	0.22	27A/AvB	0.205	29A/AvB	0.219	10B/AvB	0.24	21B/AvB	0.305	25B/AvB	0.213	37B/AvB	0.241	113	53040.7	114	51185.7	115	48555.4
1	Q9TV62	Myosin-4 OS=Sus scrofa GN=MYH4 PE=2 SV=1	30936	287893	1373	1373	114	114	105767	1	1	0	519.624	1555.85	3	1555.86	-0.0063	0	27.77	0.0071	R	TEELEEAK	K				Cmpd 8804, AutoMSn(519.6237), 99.0 min (13229323981711011)	13A/AvB	0.186	16A/AvB	0.317	27A/AvB	0.234	29A/AvB	0.207	10B/AvB	0.265	21B/AvB	0.343	25B/AvB	0.127	37B/AvB	0.266	113	28054.6	114	19757.3	115	33659.4
1	Q9TV62	Myosin-4 OS=Sus scrofa GN=MYH4 PE=2 SV=1	30936	287893	1373	1373	114	114	106035	1	1	0	784.463	1566.91	2	1566.92	-0.0081	0	20.22	0.013	R	INQQLDTK	Q				Cmpd 8257, AutoMSn(784.4628), 91.1 min (13229323981807207)	13A/AvB	0.164	16A/AvB	0.27	27A/AvB	0.203	29A/AvB	0.262	10B/AvB	0.302	21B/AvB	0.444	25B/AvB	0.101	37B/AvB	0.152	113	12910.9	114	6984.31	115	11544
1	Q9TV62	Myosin-4 OS=Sus scrofa GN=MYH4 PE=2 SV=1	30936	287893	1373	1373	114	114	106159	1	1	0	525.298	1572.87	3	1572.88	-0.0091	0	30.16	0.0015	K	MVALMQEK	N	Oxidation (M)	0.20000000.0		Cmpd 9584, AutoMSn(525.2986), 106.6 min (13229323981858522)	13A/AvB	0.234	16A/AvB	0.328	27A/AvB	0.261	29A/AvB	0.204	10B/AvB	0.283	21B/AvB	0.322	25B/AvB	0.162	37B/AvB	0.233	113	78166.2	114	64582.6	115	90558.2
1	Q9TV62	Myosin-4 OS=Sus scrofa GN=MYH4 PE=2 SV=1	30936	287893	1373	1373	114	114	106160	1	1	0	525.299	1572.87	3	1572.88	-0.0088	0	20.78	0.017	K	MVALMQEK	N	Oxidation (M)	0.20000000.0		Cmpd 9922, AutoMSn(525.2987), 111.7 min (13229323981713247)	13A/AvB	0.155	16A/AvB	0.488	27A/AvB	0.288	29A/AvB	0.148	10B/AvB	0.326	21B/AvB	0.409	25B/AvB	0.12	37B/AvB	0.145	113	7456.21	114	3555.26	115	11163.3
1	Q9TV62	Myosin-4 OS=Sus scrofa GN=MYH4 PE=2 SV=1	30936	287893	1373	1373	114	114	106162	1	1	0	525.299	1572.87	3	1572.88	-0.0082	0	24.06	0.0059	K	MVALMQEK	N	Oxidation (M)	0.20000000.0		Cmpd 9559, AutoMSn(525.2988), 106.3 min (13229323981858472)	13A/AvB	0.261	16A/AvB	0.433	27A/AvB	0.326	29A/AvB	0.229	10B/AvB	0.295	21B/AvB	0.378	25B/AvB	0.14	37B/AvB	0.186	113	48569.6	114	42920.2	115	71159.9
1	Q9TV62	Myosin-4 OS=Sus scrofa GN=MYH4 PE=2 SV=1	30936	287893	1373	1373	114	114	106163	1	1	0	525.299	1572.87	3	1572.88	-0.008	0	18.21	0.02	K	MVALMQEK	N	Oxidation (M)	0.00002000.0		Cmpd 10490, AutoMSn(525.2989), 118.0 min (13229323981763472)	13A/AvB	-0.031	16A/AvB	0.256	27A/AvB	0.021	29A/AvB	-0.001	10B/AvB	0.351	21B/AvB	0.583	25B/AvB	-0.026	37B/AvB	0.092	113	25027.3	114	-2223.1	115	18249.8
1	Q9TV62	Myosin-4 OS=Sus scrofa GN=MYH4 PE=2 SV=1	30936	287893	1373	1373	114	114	106165	1	1	0	525.299	1572.88	3	1572.88	-0.0079	0	37.28	0.0019	K	MVALMQEK	N	Oxidation (M)	0.20000000.0		Cmpd 9961, AutoMSn(525.2989), 110.8 min (13229323981548538)	13A/AvB	0.238	16A/AvB	0.392	27A/AvB	0.237	29A/AvB	0.194	10B/AvB	0.293	21B/AvB	0.398	25B/AvB	0.125	37B/AvB	0.184	113	22870.3	114	18546.4	115	30640.8
1	Q9TV62	Myosin-4 OS=Sus scrofa GN=MYH4 PE=2 SV=1	30936	287893	1373	1373	114	114	106166	1	1	0	525.299	1572.88	3	1572.88	-0.0075	0	16.65	0.027	K	MVALMQEK	N	Oxidation (M)	0.20000000.0		Cmpd 9940, AutoMSn(525.2991), 111.8 min (13229323981762372)	13A/AvB	0.095	16A/AvB	1.065	27A/AvB	0.749	29A/AvB	-0.015	10B/AvB	0.769	21B/AvB	0.282	25B/AvB	-0.051	37B/AvB	0	113	14845.3	114	1828.25	115	20579.2
1	Q9TV62	Myosin-4 OS=Sus scrofa GN=MYH4 PE=2 SV=1	30936	287893	1373	1373	114	114	106167	1	1	0	525.299	1572.88	3	1572.88	-0.0075	0	20.36	0.012	K	MVALMQEK	N	Oxidation (M)	0.00002000.0		Cmpd 10430, AutoMSn(525.2991), 115.2 min (13229323981811553)	13A/AvB	0.242	16A/AvB	0.353	27A/AvB	0.294	29A/AvB	0.235	10B/AvB	0.288	21B/AvB	0.37	25B/AvB	0.134	37B/AvB	0.208	113	53460.1	114	44853.5	115	65579
1	Q9TV62	Myosin-4 OS=Sus scrofa GN=MYH4 PE=2 SV=1	30936	287893	1373	1373	114	114	106631	1	1	0	529.315	1584.92	3	1584.93	-0.0103	0	19.05	0.016	K	TSVFVAEPK	E				Cmpd 10913, AutoMSn(529.3151), 122.8 min (13229323981764318)	13A/AvB	-0.057	16A/AvB	0.052	27A/AvB	0.308	29A/AvB	0.019	10B/AvB	0.759	21B/AvB	0.145	25B/AvB	-0.022	37B/AvB	0.118	113	26653.3	114	-2011.56	115	1826.7
1	Q9TV62	Myosin-4 OS=Sus scrofa GN=MYH4 PE=2 SV=1	30936	287893	1373	1373	114	114	106634	1	1	0	793.47	1584.93	2	1584.93	-0.0084	0	32.86	0.0021	K	TSVFVAEPK	E				Cmpd 10781, AutoMSn(793.4699), 119.2 min (13229323981812255)	13A/AvB	0.318	16A/AvB	0.22	27A/AvB	0.161	29A/AvB	0.219	10B/AvB	0.277	21B/AvB	0.441	25B/AvB	0.105	37B/AvB	0.178	113	10018.1	114	11505.6	115	7952.21
1	Q9TV62	Myosin-4 OS=Sus scrofa GN=MYH4 PE=2 SV=1	30936	287893	1373	1373	114	114	106636	1	1	0	529.316	1584.93	3	1584.93	-0.0079	0	31.85	0.0069	K	TSVFVAEPK	E				Cmpd 10623, AutoMSn(529.3159), 118.2 min (13229323981860600)	13A/AvB	0.268	16A/AvB	0.322	27A/AvB	0.178	29A/AvB	0.207	10B/AvB	0.31	21B/AvB	0.348	25B/AvB	0.11	37B/AvB	0.232	113	36432	114	31451.3	115	37773
1	Q9TV62	Myosin-4 OS=Sus scrofa GN=MYH4 PE=2 SV=1	30936	287893	1373	1373	114	114	106637	1	1	0	529.316	1584.93	3	1584.93	-0.0076	0	29.55	0.012	K	TSVFVAEPK	E				Cmpd 10784, AutoMSn(529.3159), 121.5 min (13229323981714971)	13A/AvB	0.201	16A/AvB	0.337	27A/AvB	0.165	29A/AvB	0.117	10B/AvB	0.306	21B/AvB	0.314	25B/AvB	0.134	37B/AvB	0.247	113	12343.7	114	8129.03	115	13591.6
1	Q9TV62	Myosin-4 OS=Sus scrofa GN=MYH4 PE=2 SV=1	30936	287893	1373	1373	114	114	106638	1	1	0	529.316	1584.93	3	1584.93	-0.0074	0	29.12	0.013	K	TSVFVAEPK	E				Cmpd 10805, AutoMSn(529.3160), 121.6 min (13229323981764102)	13A/AvB	1.752	16A/AvB	-0.015	27A/AvB	0.31	29A/AvB	0.39	10B/AvB	0.5	21B/AvB	0.162	25B/AvB	-0.023	37B/AvB	0.361	113	13970	114	48941.3	115	-423.127
1	Q9TV62	Myosin-4 OS=Sus scrofa GN=MYH4 PE=2 SV=1	30936	287893	1373	1373	114	114	106639	1	1	0	529.316	1584.93	3	1584.93	-0.0074	0	31.72	0.0071	K	TSVFVAEPK	E				Cmpd 10970, AutoMSn(529.3160), 122.1 min (13229323981550556)	13A/AvB	0.273	16A/AvB	0.296	27A/AvB	0.161	29A/AvB	0.204	10B/AvB	0.291	21B/AvB	0.312	25B/AvB	0.148	37B/AvB	0.248	113	23786.5	114	22286.7	115	24172.7
1	Q9TV62	Myosin-4 OS=Sus scrofa GN=MYH4 PE=2 SV=1	30936	287893	1373	1373	114	114	106640	1	1	0	529.316	1584.93	3	1584.93	-0.007	0	32.1	0.0065	K	TSVFVAEPK	E				Cmpd 10549, AutoMSn(529.3162), 117.3 min (13229323981860452)	13A/AvB	0.265	16A/AvB	0.296	27A/AvB	0.166	29A/AvB	0.157	10B/AvB	0.305	21B/AvB	0.327	25B/AvB	0.111	37B/AvB	0.257	113	49344.5	114	42955.5	115	47955.3
1	Q9TV62	Myosin-4 OS=Sus scrofa GN=MYH4 PE=2 SV=1	30936	287893	1373	1373	114	114	106642	1	1	0	529.316	1584.93	3	1584.93	-0.0068	0	22.91	0.018	K	TSVFVAEPK	E				Cmpd 10541, AutoMSn(529.3162), 117.3 min (13229323981860436)	13A/AvB	0.262	16A/AvB	0.315	27A/AvB	0.224	29A/AvB	0.163	10B/AvB	0.301	21B/AvB	0.37	25B/AvB	0.12	37B/AvB	0.209	113	37181.1	114	32328.5	115	38974.6
1	Q9TV62	Myosin-4 OS=Sus scrofa GN=MYH4 PE=2 SV=1	30936	287893	1373	1373	114	114	106643	1	1	0	529.316	1584.93	3	1584.93	-0.0066	0	29.07	0.013	K	TSVFVAEPK	E				Cmpd 10779, AutoMSn(529.3163), 119.2 min (13229323981812251)	13A/AvB	0.321	16A/AvB	0.3	27A/AvB	0.189	29A/AvB	0.215	10B/AvB	0.261	21B/AvB	0.364	25B/AvB	0.105	37B/AvB	0.269	113	42064.4	114	51573.7	115	48307.9
1	Q9TV62	Myosin-4 OS=Sus scrofa GN=MYH4 PE=2 SV=1	30936	287893	1373	1373	114	114	106644	1	1	0	529.316	1584.93	3	1584.93	-0.0065	0	36.1	0.0026	K	TSVFVAEPK	E				Cmpd 10856, AutoMSn(529.3164), 122.4 min (13229323981715115)	13A/AvB	0.316	16A/AvB	0.316	27A/AvB	0.207	29A/AvB	0.167	10B/AvB	0.294	21B/AvB	0.291	25B/AvB	0.114	37B/AvB	0.301	113	9944.32	114	10713.8	115	10689.7
1	Q9TV62	Myosin-4 OS=Sus scrofa GN=MYH4 PE=2 SV=1	30936	287893	1373	1373	114	114	106645	1	1	0	793.471	1584.93	2	1584.93	-0.0065	0	42.55	0.0004	K	TSVFVAEPK	E				Cmpd 10916, AutoMSn(793.4709), 121.5 min (13229323981550448)	13A/AvB	0.289	16A/AvB	0.245	27A/AvB	0.127	29A/AvB	0.207	10B/AvB	0.304	21B/AvB	0.345	25B/AvB	0.105	37B/AvB	0.245	113	19549.3	114	18567.2	115	15722
1	Q9TV62	Myosin-4 OS=Sus scrofa GN=MYH4 PE=2 SV=1	30936	287893	1373	1373	114	114	106646	1	1	0	793.471	1584.93	2	1584.93	-0.0063	0	36.65	0.00037	K	TSVFVAEPK	E				Cmpd 10554, AutoMSn(793.4709), 117.4 min (13229323981860462)	13A/AvB	0.217	16A/AvB	0.276	27A/AvB	0.178	29A/AvB	0.149	10B/AvB	0.234	21B/AvB	0.402	25B/AvB	0.074	37B/AvB	0.289	113	9620.21	114	8905.36	115	11339.7
1	Q9TV62	Myosin-4 OS=Sus scrofa GN=MYH4 PE=2 SV=1	30936	287893	1373	1373	114	114	106647	1	1	0	529.316	1584.93	3	1584.93	-0.0063	0	32.66	0.0057	K	TSVFVAEPK	E				Cmpd 10559, AutoMSn(529.3164), 117.5 min (13229323981860472)	13A/AvB	0.305	16A/AvB	0.253	27A/AvB	0.113	29A/AvB	0.185	10B/AvB	0.283	21B/AvB	0.306	25B/AvB	0.099	37B/AvB	0.311	113	83625.9	114	90065.3	115	74863.9
1	Q9TV62	Myosin-4 OS=Sus scrofa GN=MYH4 PE=2 SV=1	30936	287893	1373	1373	114	114	106649	1	1	0	529.317	1584.93	3	1584.93	-0.0057	0	34.5	0.0034	K	TSVFVAEPK	E				Cmpd 10841, AutoMSn(529.3166), 122.0 min (13229323981764174)	13A/AvB	1.366	16A/AvB	-0.06	27A/AvB	0.216	29A/AvB	0.319	10B/AvB	0.457	21B/AvB	0.111	25B/AvB	-0.016	37B/AvB	0.449	113	28364.8	114	84855.1	115	-3698.39
1	Q9TV62	Myosin-4 OS=Sus scrofa GN=MYH4 PE=2 SV=1	30936	287893	1373	1373	114	114	106651	1	1	0	529.317	1584.93	3	1584.93	-0.0055	0	38.76	0.0013	K	TSVFVAEPK	E				Cmpd 10898, AutoMSn(529.3167), 121.3 min (13229323981550412)	13A/AvB	0.268	16A/AvB	0.313	27A/AvB	0.162	29A/AvB	0.192	10B/AvB	0.36	21B/AvB	0.304	25B/AvB	0.09	37B/AvB	0.246	113	31473.3	114	23479.8	115	27409.5
1	Q9TV62	Myosin-4 OS=Sus scrofa GN=MYH4 PE=2 SV=1	30936	287893	1373	1373	114	114	106652	1	1	0	529.317	1584.93	3	1584.93	-0.0054	0	41.51	0.00068	K	TSVFVAEPK	E				Cmpd 10803, AutoMSn(529.3167), 119.4 min (13229323981812299)	13A/AvB	0.276	16A/AvB	0.246	27A/AvB	0.119	29A/AvB	0.191	10B/AvB	0.28	21B/AvB	0.309	25B/AvB	0.094	37B/AvB	0.317	113	90631.5	114	89200	115	79758.4
1	Q9TV62	Myosin-4 OS=Sus scrofa GN=MYH4 PE=2 SV=1	30936	287893	1373	1373	114	114	106672	1	1	0	794.391	1586.77	2	1586.77	-0.006	0	30.78	0.0019	K	ELTYQTEEDR	K				Cmpd 7464, AutoMSn(794.3908), 82.3 min (13229323981805621)	13A/AvB	0.168	16A/AvB	0.221	27A/AvB	0.169	29A/AvB	0.172	10B/AvB	0.243	21B/AvB	0.387	25B/AvB	0.114	37B/AvB	0.256	113	9531.54	114	6601.92	115	8696.2
1	Q9TV62	Myosin-4 OS=Sus scrofa GN=MYH4 PE=2 SV=1	30936	287893	1373	1373	114	114	106673	1	1	0	794.392	1586.77	2	1586.77	-0.0043	0	20.63	0.019	K	ELTYQTEEDR	K				Cmpd 7581, AutoMSn(794.3917), 85.0 min (13229323981757654)	13A/AvB	1.893	16A/AvB	0.222	27A/AvB	1.092	29A/AvB	-0.024	10B/AvB	0.439	21B/AvB	0.104	25B/AvB	-0.06	37B/AvB	0.517	113	1774.57	114	7654.67	115	898.168
1	Q9TV62	Myosin-4 OS=Sus scrofa GN=MYH4 PE=2 SV=1	30936	287893	1373	1373	114	114	106674	1	1	0	794.392	1586.77	2	1586.77	-0.0039	0	33.51	0.00098	K	ELTYQTEEDR	K				Cmpd 7160, AutoMSn(794.3918), 79.9 min (13229323981853674)	13A/AvB	0.185	16A/AvB	0.272	27A/AvB	0.193	29A/AvB	0.19	10B/AvB	0.206	21B/AvB	0.443	25B/AvB	0.131	37B/AvB	0.22	113	14956	114	13439.2	115	19736.7
1	Q9TV62	Myosin-4 OS=Sus scrofa GN=MYH4 PE=2 SV=1	30936	287893	1373	1373	114	114	106675	1	1	0	794.392	1586.77	2	1586.77	-0.0037	0	41.12	0.00018	K	ELTYQTEEDR	K				Cmpd 7090, AutoMSn(794.3920), 79.1 min (13229323981853534)	13A/AvB	0.164	16A/AvB	0.274	27A/AvB	0.187	29A/AvB	0.223	10B/AvB	0.223	21B/AvB	0.384	25B/AvB	0.153	37B/AvB	0.24	113	20027.5	114	14726.6	115	24697.9
1	Q9TV62	Myosin-4 OS=Sus scrofa GN=MYH4 PE=2 SV=1	30936	287893	1373	1373	114	114	106676	1	1	0	794.392	1586.77	2	1586.77	-0.0034	0	37.33	0.00043	K	ELTYQTEEDR	K				Cmpd 7571, AutoMSn(794.3921), 83.9 min (13229323981543758)	13A/AvB	0.231	16A/AvB	0.363	27A/AvB	0.175	29A/AvB	0.193	10B/AvB	0.268	21B/AvB	0.3	25B/AvB	0.197	37B/AvB	0.235	113	6722.95	114	5786.7	115	9104.11
1	Q9TV62	Myosin-4 OS=Sus scrofa GN=MYH4 PE=2 SV=1	30936	287893	1373	1373	114	114	106677	1	1	0	794.392	1586.77	2	1586.77	-0.0034	0	40.44	0.00021	K	ELTYQTEEDR	K				Cmpd 7643, AutoMSn(794.3921), 84.7 min (13229323981543902)	13A/AvB	0.174	16A/AvB	0.265	27A/AvB	0.208	29A/AvB	0.166	10B/AvB	0.274	21B/AvB	0.421	25B/AvB	0.135	37B/AvB	0.17	113	7745.96	114	4928.5	115	7489.31
1	Q9TV62	Myosin-4 OS=Sus scrofa GN=MYH4 PE=2 SV=1	30936	287893	1373	1373	114	114	106678	1	1	0	794.392	1586.77	2	1586.77	-0.0033	0	20.17	0.023	K	ELTYQTEEDR	K				Cmpd 7394, AutoMSn(794.3921), 81.5 min (13229323981805481)	13A/AvB	0.216	16A/AvB	0.203	27A/AvB	0.192	29A/AvB	0.163	10B/AvB	0.233	21B/AvB	0.387	25B/AvB	0.155	37B/AvB	0.226	113	8672.8	114	8039.28	115	7548.38
1	Q9TV62	Myosin-4 OS=Sus scrofa GN=MYH4 PE=2 SV=1	30936	287893	1373	1373	114	114	106834	1	1	0	530.63	1588.87	3	1588.88	-0.0091	0	19.39	0.015	K	MVALMQEK	N	2 Oxidation (M)	0.20002000.0		Cmpd 7577, AutoMSn(530.6302), 83.6 min (13229323981805847)	13A/AvB	0.205	16A/AvB	0.346	27A/AvB	0.297	29A/AvB	0.245	10B/AvB	0.259	21B/AvB	0.302	25B/AvB	0.211	37B/AvB	0.229	113	88798.2	114	70548.1	115	118729
1	Q9TV62	Myosin-4 OS=Sus scrofa GN=MYH4 PE=2 SV=1	30936	287893	1373	1373	114	114	106835	1	1	0	530.63	1588.87	3	1588.88	-0.0087	0	33.95	0.00065	K	MVALMQEK	N	2 Oxidation (M)	0.20002000.0		Cmpd 7649, AutoMSn(530.6303), 84.4 min (13229323981805991)	13A/AvB	0.238	16A/AvB	0.346	27A/AvB	0.293	29A/AvB	0.277	10B/AvB	0.265	21B/AvB	0.337	25B/AvB	0.158	37B/AvB	0.24	113	65665.8	114	58949.6	115	85558.9
1	Q9TV62	Myosin-4 OS=Sus scrofa GN=MYH4 PE=2 SV=1	30936	287893	1373	1373	114	114	106836	1	1	0	530.63	1588.87	3	1588.88	-0.0081	0	43.18	0.00047	K	MVALMQEK	N	2 Oxidation (M)	0.20002000.0		Cmpd 7740, AutoMSn(530.6305), 86.8 min (13229323981757972)	13A/AvB	-0.048	16A/AvB	0.934	27A/AvB	0.641	29A/AvB	-0.014	10B/AvB	0.662	21B/AvB	0.132	25B/AvB	-0.039	37B/AvB	0.245	113	24376.5	114	-1753.04	115	34403.4
1	Q9TV62	Myosin-4 OS=Sus scrofa GN=MYH4 PE=2 SV=1	30936	287893	1373	1373	114	114	106837	1	1	0	530.631	1588.87	3	1588.88	-0.008	0	19.21	0.018	K	MVALMQEK	N	2 Oxidation (M)	0.20002000.0		Cmpd 7286, AutoMSn(530.6305), 81.3 min (13229323981853926)	13A/AvB	0.205	16A/AvB	0.361	27A/AvB	0.276	29A/AvB	0.188	10B/AvB	0.335	21B/AvB	0.373	25B/AvB	0.12	37B/AvB	0.172	113	91274.1	114	55931.4	115	98140.5
1	Q9TV62	Myosin-4 OS=Sus scrofa GN=MYH4 PE=2 SV=1	30936	287893	1373	1373	114	114	106840	1	1	0	530.631	1588.87	3	1588.88	-0.0076	0	47.02	0.00016	K	MVALMQEK	N	2 Oxidation (M)	0.20002000.0		Cmpd 7315, AutoMSn(530.6307), 81.6 min (13229323981853984)	13A/AvB	0.209	16A/AvB	0.27	27A/AvB	0.239	29A/AvB	0.216	10B/AvB	0.281	21B/AvB	0.311	25B/AvB	0.158	37B/AvB	0.25	113	132519	114	98890.1	115	127745
1	Q9TV62	Myosin-4 OS=Sus scrofa GN=MYH4 PE=2 SV=1	30936	287893	1373	1373	114	114	106842	1	1	0	530.631	1588.87	3	1588.88	-0.0072	0	37.67	0.00052	K	MVALMQEK	N	2 Oxidation (M)	0.20002000.0		Cmpd 7757, AutoMSn(530.6308), 86.0 min (13229323981544130)	13A/AvB	0.277	16A/AvB	0.336	27A/AvB	0.277	29A/AvB	0.171	10B/AvB	0.295	21B/AvB	0.341	25B/AvB	0.174	37B/AvB	0.19	113	42239.7	114	39574.6	115	48154.2
1	Q9TV62	Myosin-4 OS=Sus scrofa GN=MYH4 PE=2 SV=1	30936	287893	1373	1373	114	114	106843	1	1	0	530.631	1588.87	3	1588.88	-0.0069	0	48.97	0.0001	K	MVALMQEK	N	2 Oxidation (M)	0.20002000.0		Cmpd 7748, AutoMSn(530.6309), 87.0 min (13229323981708899)	13A/AvB	0.249	16A/AvB	0.257	27A/AvB	0.249	29A/AvB	0.2	10B/AvB	0.232	21B/AvB	0.354	25B/AvB	0.144	37B/AvB	0.27	113	18907.4	114	20284.8	115	20873.3
1	Q9TV62	Myosin-4 OS=Sus scrofa GN=MYH4 PE=2 SV=1	30936	287893	1373	1373	114	114	107019	1	1	0	532.648	1594.92	3	1594.93	-0.0085	0	28.57	0.012	K	LYEQHLGK	S				Cmpd 8866, AutoMSn(532.6475), 98.7 min (13229323981857086)	13A/AvB	0.192	16A/AvB	0.198	27A/AvB	0.237	29A/AvB	0.215	10B/AvB	0.28	21B/AvB	0.281	25B/AvB	0.197	37B/AvB	0.242	113	149709	114	102650	115	105896
1	Q9TV62	Myosin-4 OS=Sus scrofa GN=MYH4 PE=2 SV=1	30936	287893	1373	1373	114	114	107021	1	1	0	532.648	1594.92	3	1594.93	-0.0079	0	18.22	0.02	K	LYEQHLGK	S				Cmpd 8792, AutoMSn(532.6477), 97.9 min (13229323981856938)	13A/AvB	0.189	16A/AvB	0.245	27A/AvB	0.232	29A/AvB	0.193	10B/AvB	0.294	21B/AvB	0.312	25B/AvB	0.16	37B/AvB	0.234	113	123244	114	79110	115	102460
1	Q9TV62	Myosin-4 OS=Sus scrofa GN=MYH4 PE=2 SV=1	30936	287893	1373	1373	114	114	107024	1	1	0	532.648	1594.92	3	1594.93	-0.0076	0	16.75	0.039	K	LYEQHLGK	S				Cmpd 9249, AutoMSn(532.6478), 102.1 min (13229323981809191)	13A/AvB	0.201	16A/AvB	0.258	27A/AvB	0.227	29A/AvB	0.213	10B/AvB	0.31	21B/AvB	0.323	25B/AvB	0.177	37B/AvB	0.19	113	71343.6	114	46298.8	115	59390.6
1	Q9TV62	Myosin-4 OS=Sus scrofa GN=MYH4 PE=2 SV=1	30936	287893	1373	1373	114	114	107027	1	1	0	532.648	1594.92	3	1594.93	-0.007	0	17.63	0.03	K	LYEQHLGK	S				Cmpd 9767, AutoMSn(532.6480), 109.8 min (13229323981762026)	13A/AvB	-0.06	16A/AvB	0.041	27A/AvB	0.388	29A/AvB	-0.008	10B/AvB	0.827	21B/AvB	0.039	25B/AvB	-0.021	37B/AvB	0.155	113	134426	114	-9740.16	115	6722.83
1	Q9TV62	Myosin-4 OS=Sus scrofa GN=MYH4 PE=2 SV=1	30936	287893	1373	1373	114	114	107029	1	1	0	532.648	1594.92	3	1594.93	-0.0068	0	23.32	0.0065	K	LYEQHLGK	S				Cmpd 9776, AutoMSn(532.6481), 110.1 min (13229323981712955)	13A/AvB	0.178	16A/AvB	0.23	27A/AvB	0.314	29A/AvB	0.2	10B/AvB	0.375	21B/AvB	0.223	25B/AvB	0.176	37B/AvB	0.226	113	37695.4	114	17901.8	115	23089.6
1	Q9TV62	Myosin-4 OS=Sus scrofa GN=MYH4 PE=2 SV=1	30936	287893	1373	1373	114	114	107031	1	1	0	532.648	1594.92	3	1594.93	-0.0068	0	23.29	0.0065	K	LYEQHLGK	S				Cmpd 9583, AutoMSn(532.6481), 106.5 min (13229323981547782)	13A/AvB	0.199	16A/AvB	0.247	27A/AvB	0.264	29A/AvB	0.221	10B/AvB	0.322	21B/AvB	0.306	25B/AvB	0.15	37B/AvB	0.222	113	56093.4	114	34684.1	115	43030.3
1	Q9TV62	Myosin-4 OS=Sus scrofa GN=MYH4 PE=2 SV=1	30936	287893	1373	1373	114	114	107160	1	1	1	534.29	1599.85	3	1599.85	-0.0044	0	28.54	0.0036	K	DTQLHLDDAIR	G				Cmpd 10600, AutoMSn(534.2899), 117.1 min (13229323981811893)	13A/AvB	0.221	16A/AvB	0.318	27A/AvB	0.254	29A/AvB	0.236	10B/AvB	0.299	21B/AvB	0.365	25B/AvB	0.142	37B/AvB	0.194	113	34082.6	114	25262.9	115	36342.3
1	Q9TV62	Myosin-4 OS=Sus scrofa GN=MYH4 PE=2 SV=1	30936	287893	1373	1373	114	114	107161	1	1	1	534.29	1599.85	3	1599.85	-0.004	0	31.98	0.001	K	DTQLHLDDAIR	G				Cmpd 10853, AutoMSn(534.2900), 122.2 min (13229323981764198)	13A/AvB	-0.085	16A/AvB	1.336	27A/AvB	0.723	29A/AvB	0.035	10B/AvB	0.784	21B/AvB	-0.036	25B/AvB	0.027	37B/AvB	0.225	113	19985.3	114	-2168.65	115	34035
1	Q9TV62	Myosin-4 OS=Sus scrofa GN=MYH4 PE=2 SV=1	30936	287893	1373	1373	114	114	107162	1	1	1	534.29	1599.85	3	1599.85	-0.0037	0	28.82	0.002	K	DTQLHLDDAIR	G				Cmpd 10575, AutoMSn(534.2902), 117.6 min (13229323981860504)	13A/AvB	0.212	16A/AvB	0.293	27A/AvB	0.27	29A/AvB	0.221	10B/AvB	0.33	21B/AvB	0.406	25B/AvB	0.117	37B/AvB	0.148	113	46092.1	114	29600.4	115	40949
1	Q9TV62	Myosin-4 OS=Sus scrofa GN=MYH4 PE=2 SV=1	30936	287893	1373	1373	114	114	107164	1	1	1	534.29	1599.85	3	1599.85	-0.0033	0	21.33	0.01	K	DTQLHLDDAIR	G				Cmpd 10832, AutoMSn(534.2903), 122.1 min (13229323981715067)	13A/AvB	0.197	16A/AvB	0.319	27A/AvB	0.209	29A/AvB	0.266	10B/AvB	0.275	21B/AvB	0.376	25B/AvB	0.142	37B/AvB	0.207	113	8092.48	114	5799.54	115	9407.04
1	Q9TV62	Myosin-4 OS=Sus scrofa GN=MYH4 PE=2 SV=1	30936	287893	1373	1373	114	114	107165	1	1	1	534.29	1599.85	3	1599.85	-0.0033	0	20.67	0.012	K	DTQLHLDDAIR	G				Cmpd 10832, AutoMSn(534.2903), 120.6 min (13229323981550280)	13A/AvB	0.245	16A/AvB	0.342	27A/AvB	0.275	29A/AvB	0.284	10B/AvB	0.239	21B/AvB	0.436	25B/AvB	0.127	37B/AvB	0.199	113	15356.9	114	15751	115	21994.1
1	Q9TV62	Myosin-4 OS=Sus scrofa GN=MYH4 PE=2 SV=1	30936	287893	1373	1373	114	114	107166	1	1	1	534.29	1599.85	3	1599.85	-0.0033	0	30.75	0.0013	K	DTQLHLDDAIR	G				Cmpd 10235, AutoMSn(534.2903), 113.8 min (13229323981859824)	13A/AvB	0.235	16A/AvB	0.356	27A/AvB	0.265	29A/AvB	0.269	10B/AvB	0.263	21B/AvB	0.406	25B/AvB	0.154	37B/AvB	0.176	113	48105.2	114	42843	115	64977.4
1	Q9TV62	Myosin-4 OS=Sus scrofa GN=MYH4 PE=2 SV=1	30936	287893	1373	1373	114	114	107167	1	1	1	534.29	1599.85	3	1599.85	-0.0031	0	22.44	0.0079	K	DTQLHLDDAIR	G				Cmpd 11153, AutoMSn(534.2904), 125.6 min (13229323981764798)	13A/AvB	-0.038	16A/AvB	1.768	27A/AvB	1.112	29A/AvB	0.1	10B/AvB	0.855	21B/AvB	-0.01	25B/AvB	-0.058	37B/AvB	0.213	113	13853.5	114	-607.724	115	28653.2
1	Q9TV62	Myosin-4 OS=Sus scrofa GN=MYH4 PE=2 SV=1	30936	287893	1373	1373	114	114	107168	1	1	1	534.29	1599.85	3	1599.85	-0.0031	0	26.26	0.0034	K	DTQLHLDDAIR	G				Cmpd 10595, AutoMSn(534.2904), 117.9 min (13229323981860544)	13A/AvB	0.245	16A/AvB	0.337	27A/AvB	0.263	29A/AvB	0.185	10B/AvB	0.318	21B/AvB	0.409	25B/AvB	0.126	37B/AvB	0.147	113	38878.6	114	29942.1	115	41230.1
1	Q9TV62	Myosin-4 OS=Sus scrofa GN=MYH4 PE=2 SV=1	30936	287893	1373	1373	114	114	107171	1	1	1	534.29	1599.85	3	1599.85	-0.0029	0	21.5	0.0096	K	DTQLHLDDAIR	G				Cmpd 10966, AutoMSn(534.2904), 121.3 min (13229323981812625)	13A/AvB	0.217	16A/AvB	0.322	27A/AvB	0.247	29A/AvB	0.221	10B/AvB	0.305	21B/AvB	0.415	25B/AvB	0.121	37B/AvB	0.159	113	21777.4	114	15458.9	115	23019.7
1	Q9TV62	Myosin-4 OS=Sus scrofa GN=MYH4 PE=2 SV=1	30936	287893	1373	1373	114	114	107172	1	1	1	534.29	1599.85	3	1599.85	-0.0028	0	29.12	0.0019	K	DTQLHLDDAIR	G				Cmpd 11198, AutoMSn(534.2905), 126.3 min (13229323981715799)	13A/AvB	0.267	16A/AvB	0.376	27A/AvB	0.314	29A/AvB	0.241	10B/AvB	0.33	21B/AvB	0.376	25B/AvB	0.186	37B/AvB	0.108	113	7756.03	114	6274.4	115	8852.04
1	Q9TV62	Myosin-4 OS=Sus scrofa GN=MYH4 PE=2 SV=1	30936	287893	1373	1373	114	114	107173	1	1	1	534.29	1599.85	3	1599.85	-0.0028	0	40.54	0.00016	K	DTQLHLDDAIR	G				Cmpd 11150, AutoMSn(534.2905), 124.1 min (13229323981550916)	13A/AvB	0.155	16A/AvB	0.292	27A/AvB	0.193	29A/AvB	0.24	10B/AvB	0.329	21B/AvB	0.37	25B/AvB	0.146	37B/AvB	0.156	113	22718.9	114	10737.2	115	20165.8
1	Q9TV62	Myosin-4 OS=Sus scrofa GN=MYH4 PE=2 SV=1	30936	287893	1373	1373	114	114	107175	1	1	1	534.29	1599.85	3	1599.85	-0.0026	0	17.95	0.021	K	DTQLHLDDAIR	G				Cmpd 11126, AutoMSn(534.2905), 125.4 min (13229323981715655)	13A/AvB	0.247	16A/AvB	0.331	27A/AvB	0.254	29A/AvB	0.183	10B/AvB	0.276	21B/AvB	0.386	25B/AvB	0.228	37B/AvB	0.109	113	6665.18	114	5962.19	115	7975.18
1	Q9TV62	Myosin-4 OS=Sus scrofa GN=MYH4 PE=2 SV=1	30936	287893	1373	1373	114	114	107176	1	1	1	534.291	1599.85	3	1599.85	-0.0024	0	39.51	0.0002	K	DTQLHLDDAIR	G				Cmpd 10523, AutoMSn(534.2906), 117.1 min (13229323981860400)	13A/AvB	0.22	16A/AvB	0.299	27A/AvB	0.252	29A/AvB	0.16	10B/AvB	0.319	21B/AvB	0.43	25B/AvB	0.1	37B/AvB	0.151	113	35832.6	114	24704.1	115	33525.2
1	Q9TV62	Myosin-4 OS=Sus scrofa GN=MYH4 PE=2 SV=1	30936	287893	1373	1373	114	114	107295	1	1	0	802.439	1602.86	2	1602.87	-0.0045	0	27.66	0.0025	K	GSSFQTVSALFR	E				Cmpd 16115, AutoMSn(802.4387), 179.3 min (13229323981822923)	13A/AvB	0.18	16A/AvB	0.263	27A/AvB	0.243	29A/AvB	0.26	10B/AvB	0.281	21B/AvB	0.297	25B/AvB	0.147	37B/AvB	0.275	113	17566.7	114	11258.7	115	16440.3
1	Q9TV62	Myosin-4 OS=Sus scrofa GN=MYH4 PE=2 SV=1	30936	287893	1373	1373	114	114	107297	1	1	0	802.439	1602.86	2	1602.87	-0.0043	0	47.94	3.2e-05	K	GSSFQTVSALFR	E				Cmpd 16203, AutoMSn(802.4388), 181.5 min (13229323981561022)	13A/AvB	0.273	16A/AvB	0.214	27A/AvB	0.247	29A/AvB	0.303	10B/AvB	0.323	21B/AvB	0.216	25B/AvB	0.225	37B/AvB	0.236	113	7973.07	114	6745.58	115	5280.17
1	Q9TV62	Myosin-4 OS=Sus scrofa GN=MYH4 PE=2 SV=1	30936	287893	1373	1373	114	114	107298	1	1	0	535.295	1602.86	3	1602.87	-0.0041	0	29.22	0.0018	K	GSSFQTVSALFR	E				Cmpd 16151, AutoMSn(535.2950), 179.7 min (13229323981822995)	13A/AvB	0.192	16A/AvB	0.369	27A/AvB	0.239	29A/AvB	0.103	10B/AvB	0.458	21B/AvB	0.301	25B/AvB	0.142	37B/AvB	0.099	113	16201.2	114	6806.78	115	13054.9
1	Q9TV62	Myosin-4 OS=Sus scrofa GN=MYH4 PE=2 SV=1	30936	287893	1373	1373	114	114	107299	1	1	0	802.439	1602.86	2	1602.87	-0.0041	0	23.27	0.0066	K	GSSFQTVSALFR	E				Cmpd 16019, AutoMSn(802.4388), 181.0 min (13229323981774530)	13A/AvB	-0.034	16A/AvB	0.056	27A/AvB	0.34	29A/AvB	-0.007	10B/AvB	0.448	21B/AvB	0.46	25B/AvB	-0.036	37B/AvB	0.128	113	9054.08	114	-693.609	115	1129.29
1	Q9TV62	Myosin-4 OS=Sus scrofa GN=MYH4 PE=2 SV=1	30936	287893	1373	1373	114	114	107302	1	1	0	802.439	1602.86	2	1602.87	-0.0035	0	24.5	0.005	K	GSSFQTVSALFR	E				Cmpd 15936, AutoMSn(802.4391), 178.3 min (13229323981871226)	13A/AvB	0.195	16A/AvB	0.254	27A/AvB	0.306	29A/AvB	0.189	10B/AvB	0.241	21B/AvB	0.291	25B/AvB	0.185	37B/AvB	0.283	113	12100.8	114	9781.34	115	12745.1
1	Q9TV62	Myosin-4 OS=Sus scrofa GN=MYH4 PE=2 SV=1	30936	287893	1373	1373	114	114	107871	1	1	1	541.997	1622.97	3	1622.98	-0.0123	0	19.8	0.014	R	LINELSAQK	A				Cmpd 13560, AutoMSn(541.9971), 150.4 min (13229323981817813)	13A/AvB	0.169	16A/AvB	0.326	27A/AvB	0.399	29A/AvB	0.151	10B/AvB	0.415	21B/AvB	0.297	25B/AvB	0.119	37B/AvB	0.168	113	35376.9	114	14408.5	115	27798.3
1	Q9TV62	Myosin-4 OS=Sus scrofa GN=MYH4 PE=2 SV=1	30936	287893	1373	1373	114	114	107872	1	1	1	541.998	1622.97	3	1622.98	-0.0095	0	14.06	0.048	R	LINELSAQK	A				Cmpd 13602, AutoMSn(541.9980), 151.9 min (13229323981555820)	13A/AvB	0.21	16A/AvB	0.304	27A/AvB	0.208	29A/AvB	0.179	10B/AvB	0.582	21B/AvB	0.177	25B/AvB	0.113	37B/AvB	0.129	113	20367.2	114	7340.65	115	10632.9
1	Q9TV62	Myosin-4 OS=Sus scrofa GN=MYH4 PE=2 SV=1	30936	287893	1373	1373	114	114	107874	1	1	1	541.998	1622.97	3	1622.98	-0.0093	0	28.44	0.0022	R	LINELSAQK	A				Cmpd 13218, AutoMSn(541.9980), 146.5 min (13229323981817129)	13A/AvB	0.206	16A/AvB	0.315	27A/AvB	0.212	29A/AvB	0.165	10B/AvB	0.38	21B/AvB	0.333	25B/AvB	0.144	37B/AvB	0.143	113	27700.2	114	14978.6	115	22942.3
1	Q9TV62	Myosin-4 OS=Sus scrofa GN=MYH4 PE=2 SV=1	30936	287893	1373	1373	114	114	107876	1	1	1	541.998	1622.97	3	1622.98	-0.009	0	14.95	0.04	R	LINELSAQK	A				Cmpd 13484, AutoMSn(541.9982), 152.1 min (13229323981769460)	13A/AvB	-0.021	16A/AvB	0.293	27A/AvB	0.023	29A/AvB	-0.001	10B/AvB	0.491	21B/AvB	0.036	25B/AvB	0.366	37B/AvB	0.107	113	13693.8	114	-573.401	115	8178.91
1	Q9TV62	Myosin-4 OS=Sus scrofa GN=MYH4 PE=2 SV=1	30936	287893	1373	1373	114	114	107877	1	1	1	541.998	1622.97	3	1622.98	-0.009	0	52.16	2.2e-05	R	LINELSAQK	A				Cmpd 13415, AutoMSn(541.9982), 148.7 min (13229323981817523)	13A/AvB	0.241	16A/AvB	0.309	27A/AvB	0.269	29A/AvB	0.207	10B/AvB	0.369	21B/AvB	0.296	25B/AvB	0.134	37B/AvB	0.201	113	33161.1	114	21626.5	115	27795.5
1	Q9TV62	Myosin-4 OS=Sus scrofa GN=MYH4 PE=2 SV=1	30936	287893	1373	1373	114	114	107880	1	1	1	541.998	1622.97	3	1622.98	-0.0086	0	15.58	0.035	R	LINELSAQK	A				Cmpd 13141, AutoMSn(541.9983), 145.7 min (13229323981816975)	13A/AvB	0.252	16A/AvB	0.356	27A/AvB	0.188	29A/AvB	0.154	10B/AvB	0.387	21B/AvB	0.307	25B/AvB	0.215	37B/AvB	0.091	113	24188.8	114	15725.7	115	22259
1	Q9TV62	Myosin-4 OS=Sus scrofa GN=MYH4 PE=2 SV=1	30936	287893	1373	1373	114	114	107881	1	1	1	541.998	1622.97	3	1622.98	-0.0084	0	14.38	0.045	R	LINELSAQK	A				Cmpd 13292, AutoMSn(541.9983), 148.4 min (13229323981555200)	13A/AvB	0.278	16A/AvB	0.403	27A/AvB	0.232	29A/AvB	0.204	10B/AvB	0.406	21B/AvB	0.267	25B/AvB	0.18	37B/AvB	0.147	113	12821.6	114	8786.32	115	12729.8
1	Q9TV62	Myosin-4 OS=Sus scrofa GN=MYH4 PE=2 SV=1	30936	287893	1373	1373	114	114	107882	1	1	1	541.998	1622.97	3	1622.98	-0.0084	0	41.54	0.00013	R	LINELSAQK	A				Cmpd 13135, AutoMSn(541.9984), 146.5 min (13229323981865624)	13A/AvB	0.18	16A/AvB	0.31	27A/AvB	0.31	29A/AvB	0.245	10B/AvB	0.357	21B/AvB	0.28	25B/AvB	0.162	37B/AvB	0.202	113	19187	114	9682.09	115	16684.5
1	Q9TV62	Myosin-4 OS=Sus scrofa GN=MYH4 PE=2 SV=1	30936	287893	1373	1373	114	114	107883	1	1	1	541.998	1622.97	3	1622.98	-0.0082	0	41.14	0.0007	R	LINELSAQK	A				Cmpd 13241, AutoMSn(541.9984), 146.8 min (13229323981817175)	13A/AvB	0.185	16A/AvB	0.322	27A/AvB	0.193	29A/AvB	0.209	10B/AvB	0.3	21B/AvB	0.282	25B/AvB	0.17	37B/AvB	0.249	113	44311.8	114	27406.5	115	47599.7
1	Q9TV62	Myosin-4 OS=Sus scrofa GN=MYH4 PE=2 SV=1	30936	287893	1373	1373	114	114	107884	1	1	1	812.494	1622.97	2	1622.98	-0.0079	0	22.64	0.04	R	LINELSAQK	A				Cmpd 13233, AutoMSn(812.4941), 149.5 min (13229323981719869)	13A/AvB	0.242	16A/AvB	0.188	27A/AvB	0.209	29A/AvB	0.317	10B/AvB	0.317	21B/AvB	0.193	25B/AvB	0.303	37B/AvB	0.187	113	6612.03	114	5043.87	115	3916.65
1	Q9TV62	Myosin-4 OS=Sus scrofa GN=MYH4 PE=2 SV=1	30936	287893	1373	1373	114	114	107885	1	1	1	541.999	1622.97	3	1622.98	-0.0079	0	34.65	0.00056	R	LINELSAQK	A				Cmpd 13378, AutoMSn(541.9985), 151.1 min (13229323981720159)	13A/AvB	0.265	16A/AvB	0.221	27A/AvB	0.235	29A/AvB	0.234	10B/AvB	0.266	21B/AvB	0.273	25B/AvB	0.265	37B/AvB	0.195	113	3598.97	114	3578.48	115	2980.97
1	Q9TV62	Myosin-4 OS=Sus scrofa GN=MYH4 PE=2 SV=1	30936	287893	1373	1373	114	114	107886	1	1	1	541.999	1622.97	3	1622.98	-0.0077	0	47.98	3.2e-05	R	LINELSAQK	A				Cmpd 13235, AutoMSn(541.9986), 149.3 min (13229323981768962)	13A/AvB	-0.106	16A/AvB	1.972	27A/AvB	0.025	29A/AvB	0.02	10B/AvB	0.893	21B/AvB	-0.104	25B/AvB	0.001	37B/AvB	0.21	113	20101.7	114	-2387.04	115	44411.9
1	Q9TV62	Myosin-4 OS=Sus scrofa GN=MYH4 PE=2 SV=1	30936	287893	1373	1373	114	114	107888	1	1	1	812.494	1622.97	2	1622.98	-0.0075	0	50.8	7.6e-05	R	LINELSAQK	A				Cmpd 13306, AutoMSn(812.4943), 150.3 min (13229323981720015)	13A/AvB	0.294	16A/AvB	0.354	27A/AvB	0.253	29A/AvB	0.281	10B/AvB	0.196	21B/AvB	0.309	25B/AvB	0.22	37B/AvB	0.274	113	2653.85	114	3975.44	115	4786.63
1	Q9TV62	Myosin-4 OS=Sus scrofa GN=MYH4 PE=2 SV=1	30936	287893	1373	1373	114	114	107890	1	1	1	812.494	1622.97	2	1622.98	-0.0074	0	31.64	0.0039	R	LINELSAQK	A				Cmpd 13307, AutoMSn(812.4944), 150.1 min (13229323981769106)	13A/AvB	-0.033	16A/AvB	-0.005	27A/AvB	0.362	29A/AvB	-0.008	10B/AvB	0.441	21B/AvB	0.202	25B/AvB	0.144	37B/AvB	0.214	113	19180.9	114	-1416.4	115	-229.521
1	Q9TV62	Myosin-4 OS=Sus scrofa GN=MYH4 PE=2 SV=1	30936	287893	1373	1373	114	114	107891	1	1	1	541.999	1622.97	3	1622.98	-0.0073	0	41.56	0.00013	R	LINELSAQK	A				Cmpd 13410, AutoMSn(541.9987), 151.3 min (13229323981769312)	13A/AvB	-0.046	16A/AvB	0.07	27A/AvB	0.265	29A/AvB	-0.006	10B/AvB	0.599	21B/AvB	0.339	25B/AvB	-0.028	37B/AvB	0.09	113	20134	114	-1539.18	115	2351.07
1	Q9TV62	Myosin-4 OS=Sus scrofa GN=MYH4 PE=2 SV=1	30936	287893	1373	1373	114	114	107892	1	1	1	541.999	1622.97	3	1622.98	-0.0073	0	44.14	0.00035	R	LINELSAQK	A				Cmpd 12965, AutoMSn(541.9987), 144.6 min (13229323981865284)	13A/AvB	0.227	16A/AvB	0.365	27A/AvB	0.184	29A/AvB	0.223	10B/AvB	0.366	21B/AvB	0.285	25B/AvB	0.157	37B/AvB	0.191	113	35868.3	114	22242.9	115	35787.4
1	Q9TV62	Myosin-4 OS=Sus scrofa GN=MYH4 PE=2 SV=1	30936	287893	1373	1373	114	114	107893	1	1	1	541.999	1622.97	3	1622.98	-0.0071	0	50.8	1.7e-05	R	LINELSAQK	A				Cmpd 13528, AutoMSn(541.9988), 151.0 min (13229323981555672)	13A/AvB	0.265	16A/AvB	0.248	27A/AvB	0.198	29A/AvB	0.183	10B/AvB	0.392	21B/AvB	0.24	25B/AvB	0.144	37B/AvB	0.224	113	17425.8	114	11776.1	115	11044
1	Q9TV62	Myosin-4 OS=Sus scrofa GN=MYH4 PE=2 SV=1	30936	287893	1373	1373	114	114	107896	1	1	1	541.999	1622.97	3	1622.98	-0.007	0	42.54	0.00047	R	LINELSAQK	A				Cmpd 13265, AutoMSn(541.9989), 149.6 min (13229323981769022)	13A/AvB	0.178	16A/AvB	0.213	27A/AvB	-0.005	29A/AvB	0.205	10B/AvB	0.235	21B/AvB	0.569	25B/AvB	-0.024	37B/AvB	0.221	113	27568.8	114	20939.4	115	25047.2
1	Q9TV62	Myosin-4 OS=Sus scrofa GN=MYH4 PE=2 SV=1	30936	287893	1373	1373	114	114	107897	1	1	1	541.999	1622.97	3	1622.98	-0.007	0	48.57	2.8e-05	R	LINELSAQK	A				Cmpd 13359, AutoMSn(541.9988), 149.2 min (13229323981555334)	13A/AvB	0.258	16A/AvB	0.421	27A/AvB	0.215	29A/AvB	0.214	10B/AvB	0.336	21B/AvB	0.339	25B/AvB	0.163	37B/AvB	0.161	113	17694	114	13574.8	115	22143.7
1	Q9TV62	Myosin-4 OS=Sus scrofa GN=MYH4 PE=2 SV=1	30936	287893	1373	1373	114	114	107899	1	1	1	812.495	1622.98	2	1622.98	-0.0066	0	19.43	0.015	R	LINELSAQK	A				Cmpd 13081, AutoMSn(812.4948), 145.9 min (13229323981865516)	13A/AvB	0.192	16A/AvB	0.317	27A/AvB	0.358	29A/AvB	0.336	10B/AvB	0.189	21B/AvB	0.371	25B/AvB	0.166	37B/AvB	0.274	113	8102.41	114	8222.31	115	13563.8
1	Q9TV62	Myosin-4 OS=Sus scrofa GN=MYH4 PE=2 SV=1	30936	287893	1373	1373	114	114	107901	1	1	1	812.495	1622.98	2	1622.98	-0.0066	0	29.82	0.0077	R	LINELSAQK	A				Cmpd 13007, AutoMSn(812.4948), 145.0 min (13229323981865368)	13A/AvB	0.245	16A/AvB	0.304	27A/AvB	0.344	29A/AvB	0.292	10B/AvB	0.274	21B/AvB	0.277	25B/AvB	0.213	37B/AvB	0.236	113	27393.2	114	24464	115	30376.9
1	Q9TV62	Myosin-4 OS=Sus scrofa GN=MYH4 PE=2 SV=1	30936	287893	1373	1373	114	114	107902	1	1	1	812.495	1622.98	2	1622.98	-0.0065	0	23.4	0.02	R	LINELSAQK	A				Cmpd 13395, AutoMSn(812.4949), 149.6 min (13229323981555406)	13A/AvB	0.256	16A/AvB	0.292	27A/AvB	0.245	29A/AvB	0.297	10B/AvB	0.268	21B/AvB	0.275	25B/AvB	0.204	37B/AvB	0.253	113	27685.6	114	26425.3	115	30156.7
1	Q9TV62	Myosin-4 OS=Sus scrofa GN=MYH4 PE=2 SV=1	30936	287893	1373	1373	114	114	107903	1	1	1	541.999	1622.98	3	1622.98	-0.0064	0	44.35	0.0002	R	LINELSAQK	A				Cmpd 13202, AutoMSn(541.9990), 149.1 min (13229323981719807)	13A/AvB	0.295	16A/AvB	0.38	27A/AvB	0.183	29A/AvB	0.194	10B/AvB	0.338	21B/AvB	0.246	25B/AvB	0.207	37B/AvB	0.209	113	7063.75	114	6159.43	115	7927.76
1	Q9TV62	Myosin-4 OS=Sus scrofa GN=MYH4 PE=2 SV=1	30936	287893	1373	1373	114	114	107904	1	1	1	541.999	1622.98	3	1622.98	-0.0064	0	14.91	0.04	R	LINELSAQK	A				Cmpd 13202, AutoMSn(541.9990), 148.9 min (13229323981768896)	13A/AvB	-0.074	16A/AvB	0.903	27A/AvB	0.683	29A/AvB	-0.014	10B/AvB	0.755	21B/AvB	0.293	25B/AvB	-0.048	37B/AvB	0	113	10955.2	114	-1076.47	115	13101.1
1	Q9TV62	Myosin-4 OS=Sus scrofa GN=MYH4 PE=2 SV=1	30936	287893	1373	1373	114	114	107905	1	1	1	541.999	1622.98	3	1622.98	-0.0064	0	42.53	0.00042	R	LINELSAQK	A				Cmpd 13383, AutoMSn(541.9990), 149.4 min (13229323981555382)	13A/AvB	0.258	16A/AvB	0.241	27A/AvB	0.204	29A/AvB	0.198	10B/AvB	0.289	21B/AvB	0.29	25B/AvB	0.165	37B/AvB	0.256	113	40455.4	114	36074	115	33714.1
1	Q9TV62	Myosin-4 OS=Sus scrofa GN=MYH4 PE=2 SV=1	30936	287893	1373	1373	114	114	107906	1	1	1	541.999	1622.98	3	1622.98	-0.0062	0	44.4	0.00031	R	LINELSAQK	A				Cmpd 13337, AutoMSn(541.9991), 150.4 min (13229323981769166)	13A/AvB	0.197	16A/AvB	0.239	27A/AvB	0.537	29A/AvB	-0.012	10B/AvB	0.249	21B/AvB	0.493	25B/AvB	-0.046	37B/AvB	0.304	113	35298.9	114	27864.9	115	33806.2
1	Q9TV62	Myosin-4 OS=Sus scrofa GN=MYH4 PE=2 SV=1	30936	287893	1373	1373	114	114	107907	1	1	1	812.495	1622.98	2	1622.98	-0.0062	0	37.03	0.0016	R	LINELSAQK	A				Cmpd 13467, AutoMSn(812.4950), 150.4 min (13229323981555550)	13A/AvB	0.224	16A/AvB	0.277	27A/AvB	0.202	29A/AvB	0.264	10B/AvB	0.228	21B/AvB	0.285	25B/AvB	0.206	37B/AvB	0.28	113	19479.2	114	19110.3	115	23685.9
1	Q9TV62	Myosin-4 OS=Sus scrofa GN=MYH4 PE=2 SV=1	30936	287893	1373	1373	114	114	107908	1	1	1	541.999	1622.98	3	1622.98	-0.0059	0	40.96	0.00051	R	LINELSAQK	A				Cmpd 13232, AutoMSn(541.9992), 149.4 min (13229323981719867)	13A/AvB	0.214	16A/AvB	0.327	27A/AvB	0.235	29A/AvB	0.231	10B/AvB	0.272	21B/AvB	0.226	25B/AvB	0.213	37B/AvB	0.289	113	16237.4	114	12800.7	115	19499
1	Q9TV62	Myosin-4 OS=Sus scrofa GN=MYH4 PE=2 SV=1	30936	287893	1373	1373	114	114	107909	1	1	1	541.999	1622.98	3	1622.98	-0.0059	0	48.92	0.00011	R	LINELSAQK	A				Cmpd 13271, AutoMSn(541.9992), 147.1 min (13229323981817235)	13A/AvB	0.235	16A/AvB	0.288	27A/AvB	0.226	29A/AvB	0.229	10B/AvB	0.28	21B/AvB	0.283	25B/AvB	0.182	37B/AvB	0.254	113	75104	114	62866.2	115	77116.8
1	Q9TV62	Myosin-4 OS=Sus scrofa GN=MYH4 PE=2 SV=1	30936	287893	1373	1373	114	114	107911	1	1	1	541.999	1622.98	3	1622.98	-0.0057	0	45.84	0.00022	R	LINELSAQK	A				Cmpd 13343, AutoMSn(541.9993), 147.9 min (13229323981817379)	13A/AvB	0.23	16A/AvB	0.225	27A/AvB	0.215	29A/AvB	0.234	10B/AvB	0.252	21B/AvB	0.286	25B/AvB	0.187	37B/AvB	0.275	113	60886.8	114	55582	115	54450.8
1	Q9TV62	Myosin-4 OS=Sus scrofa GN=MYH4 PE=2 SV=1	30936	287893	1373	1373	114	114	107912	1	1	1	541.999	1622.98	3	1622.98	-0.0053	0	48.57	0.00012	R	LINELSAQK	A				Cmpd 13455, AutoMSn(541.9994), 150.2 min (13229323981555526)	13A/AvB	0.213	16A/AvB	0.249	27A/AvB	0.237	29A/AvB	0.239	10B/AvB	0.258	21B/AvB	0.256	25B/AvB	0.186	37B/AvB	0.3	113	53017.6	114	43671.7	115	51191.9
1	Q9TV62	Myosin-4 OS=Sus scrofa GN=MYH4 PE=2 SV=1	30936	287893	1373	1373	114	114	107913	1	1	1	541.999	1622.98	3	1622.98	-0.0053	0	48.56	0.00012	R	LINELSAQK	A				Cmpd 12989, AutoMSn(541.9994), 144.8 min (13229323981865332)	13A/AvB	0.209	16A/AvB	0.282	27A/AvB	0.224	29A/AvB	0.25	10B/AvB	0.257	21B/AvB	0.28	25B/AvB	0.211	37B/AvB	0.252	113	76189.3	114	62017.1	115	83757.1
1	Q9TV62	Myosin-4 OS=Sus scrofa GN=MYH4 PE=2 SV=1	30936	287893	1373	1373	114	114	107914	1	1	1	542	1622.98	3	1622.98	-0.0051	0	41.43	0.00061	R	LINELSAQK	A				Cmpd 13062, AutoMSn(541.9995), 145.6 min (13229323981865478)	13A/AvB	0.213	16A/AvB	0.221	27A/AvB	0.203	29A/AvB	0.242	10B/AvB	0.211	21B/AvB	0.297	25B/AvB	0.202	37B/AvB	0.291	113	40629.8	114	41182.2	115	42615.5
1	Q9TV62	Myosin-4 OS=Sus scrofa GN=MYH4 PE=2 SV=1	30936	287893	1373	1373	114	114	107915	1	1	1	542	1622.98	3	1622.98	-0.0049	0	53.33	5.6e-05	R	LINELSAQK	A				Cmpd 13305, AutoMSn(541.9995), 150.3 min (13229323981720013)	13A/AvB	0.202	16A/AvB	0.21	27A/AvB	0.202	29A/AvB	0.221	10B/AvB	0.244	21B/AvB	0.215	25B/AvB	0.206	37B/AvB	0.335	113	17598.1	114	14540.6	115	15145
1	Q9TV62	Myosin-4 OS=Sus scrofa GN=MYH4 PE=2 SV=1	30936	287893	1373	1373	114	114	107916	1	1	1	542	1622.98	3	1622.98	-0.0029	0	20.47	0.012	R	LINELSAQK	A				Cmpd 13174, AutoMSn(542.0002), 148.8 min (13229323981719751)	13A/AvB	0.158	16A/AvB	0.321	27A/AvB	0.104	29A/AvB	0.173	10B/AvB	0.274	21B/AvB	0.479	25B/AvB	0.135	37B/AvB	0.113	113	2541.43	114	1465.32	115	2986.77
1	Q9TV62	Myosin-4 OS=Sus scrofa GN=MYH4 PE=2 SV=1	30936	287893	1373	1373	114	114	107919	1	1	0	406.785	1623.11	4	1623.12	-0.0118	0	15.77	0.03	K	IKPLLK	S				Cmpd 12072, AutoMSn(406.7847), 136.0 min (13229323981766636)	13A/AvB	-0.078	16A/AvB	1.065	27A/AvB	0.394	29A/AvB	0.501	10B/AvB	0.76	21B/AvB	0.025	25B/AvB	-0.023	37B/AvB	0.238	113	4430.13	114	-453.731	115	6209.26
1	Q9TV62	Myosin-4 OS=Sus scrofa GN=MYH4 PE=2 SV=1	30936	287893	1373	1373	114	114	107921	1	1	0	406.785	1623.11	4	1623.12	-0.0112	0	15.96	0.029	K	IKPLLK	S				Cmpd 11231, AutoMSn(406.7849), 125.0 min (13229323981861816)	13A/AvB	0.117	16A/AvB	0.23	27A/AvB	0.273	29A/AvB	0.214	10B/AvB	0.366	21B/AvB	0.272	25B/AvB	0.145	37B/AvB	0.216	113	15122.9	114	4827.53	115	9491.05
1	Q9TV62	Myosin-4 OS=Sus scrofa GN=MYH4 PE=2 SV=1	30936	287893	1373	1373	114	114	107922	1	1	0	406.785	1623.11	4	1623.12	-0.0112	0	16.38	0.026	K	IKPLLK	S				Cmpd 11160, AutoMSn(406.7848), 124.2 min (13229323981861674)	13A/AvB	0.188	16A/AvB	0.295	27A/AvB	0.207	29A/AvB	0.252	10B/AvB	0.359	21B/AvB	0.304	25B/AvB	0.158	37B/AvB	0.18	113	12009.2	114	6284.71	115	9882.23
1	Q9TV62	Myosin-4 OS=Sus scrofa GN=MYH4 PE=2 SV=1	30936	287893	1373	1373	114	114	108080	1	1	0	543.632	1627.87	3	1627.88	-0.008	0	25.48	0.0041	R	SNAACAALDK	K				Cmpd 8429, AutoMSn(543.6317), 94.7 min (13229323981759350)	13A/AvB	-0.031	16A/AvB	0.408	27A/AvB	0.376	29A/AvB	-0.002	10B/AvB	0.401	21B/AvB	0.517	25B/AvB	-0.041	37B/AvB	0.123	113	31121.6	114	-2408.42	115	31678.4
1	Q9TV62	Myosin-4 OS=Sus scrofa GN=MYH4 PE=2 SV=1	30936	287893	1373	1373	114	114	108081	1	1	0	543.632	1627.87	3	1627.88	-0.008	0	37.39	0.00051	R	SNAACAALDK	K				Cmpd 7954, AutoMSn(543.6317), 88.7 min (13229323981855262)	13A/AvB	0.226	16A/AvB	0.289	27A/AvB	0.214	29A/AvB	0.214	10B/AvB	0.225	21B/AvB	0.404	25B/AvB	0.16	37B/AvB	0.211	113	63370.6	114	63585.2	115	81357
1	Q9TV62	Myosin-4 OS=Sus scrofa GN=MYH4 PE=2 SV=1	30936	287893	1373	1373	114	114	108082	1	1	0	543.632	1627.87	3	1627.88	-0.0076	0	41.05	0.00019	R	SNAACAALDK	K				Cmpd 8238, AutoMSn(543.6319), 90.9 min (13229323981807169)	13A/AvB	0.229	16A/AvB	0.291	27A/AvB	0.218	29A/AvB	0.19	10B/AvB	0.215	21B/AvB	0.424	25B/AvB	0.144	37B/AvB	0.217	113	43283	114	46072.4	115	58536.9
1	Q9TV62	Myosin-4 OS=Sus scrofa GN=MYH4 PE=2 SV=1	30936	287893	1373	1373	114	114	108083	1	1	0	543.632	1627.87	3	1627.88	-0.0071	0	29.07	0.0026	R	SNAACAALDK	K				Cmpd 8415, AutoMSn(543.6320), 94.6 min (13229323981710233)	13A/AvB	0.261	16A/AvB	0.291	27A/AvB	0.192	29A/AvB	0.171	10B/AvB	0.301	21B/AvB	0.404	25B/AvB	0.143	37B/AvB	0.153	113	11758.6	114	10189	115	11385.2
1	Q9TV62	Myosin-4 OS=Sus scrofa GN=MYH4 PE=2 SV=1	30936	287893	1373	1373	114	114	108084	1	1	0	543.632	1627.87	3	1627.88	-0.0065	0	30.46	0.0022	R	SNAACAALDK	K				Cmpd 8430, AutoMSn(543.6322), 93.5 min (13229323981545476)	13A/AvB	0.191	16A/AvB	0.264	27A/AvB	0.193	29A/AvB	0.177	10B/AvB	0.282	21B/AvB	0.393	25B/AvB	0.148	37B/AvB	0.178	113	34151.9	114	23101.9	115	32031.1
1	Q9TV62	Myosin-4 OS=Sus scrofa GN=MYH4 PE=2 SV=1	30936	287893	1373	1373	114	114	109039	1	1	0	832.439	1662.86	2	1662.87	-0.0089	0	24.4	0.0051	R	VAEQELLDASER	V				Cmpd 10511, AutoMSn(832.4394), 118.4 min (13229323981714425)	13A/AvB	0.339	16A/AvB	0.325	27A/AvB	0.332	29A/AvB	0.236	10B/AvB	0.22	21B/AvB	0.437	25B/AvB	0.156	37B/AvB	0.188	113	1435.54	114	2214.13	115	2125.04
1	Q9TV62	Myosin-4 OS=Sus scrofa GN=MYH4 PE=2 SV=1	30936	287893	1373	1373	114	114	109047	1	1	0	832.441	1662.87	2	1662.87	-0.005	0	23.38	0.032	R	VAEQELLDASER	V				Cmpd 11995, AutoMSn(832.4413), 132.8 min (13229323981814683)	13A/AvB	0.36	16A/AvB	0.392	27A/AvB	0.277	29A/AvB	0.223	10B/AvB	0.238	21B/AvB	0.394	25B/AvB	0.171	37B/AvB	0.196	113	6586.13	114	9942.32	115	10843.6
1	Q9TV62	Myosin-4 OS=Sus scrofa GN=MYH4 PE=2 SV=1	30936	287893	1373	1373	114	114	109048	1	1	0	555.297	1662.87	3	1662.87	-0.0048	0	38.12	0.00049	R	VAEQELLDASER	V				Cmpd 12064, AutoMSn(555.2967), 133.6 min (13229323981814821)	13A/AvB	0.352	16A/AvB	0.403	27A/AvB	0.234	29A/AvB	0.287	10B/AvB	0.308	21B/AvB	0.321	25B/AvB	0.137	37B/AvB	0.235	113	19905.6	114	22730	115	26043.3
1	Q9TV62	Myosin-4 OS=Sus scrofa GN=MYH4 PE=2 SV=1	30936	287893	1373	1373	114	114	109049	1	1	0	832.442	1662.87	2	1662.87	-0.0047	0	24.42	0.0062	R	VAEQELLDASER	V				Cmpd 11991, AutoMSn(832.4415), 135.3 min (13229323981717385)	13A/AvB	0.273	16A/AvB	0.297	27A/AvB	0.269	29A/AvB	0.193	10B/AvB	0.187	21B/AvB	0.382	25B/AvB	0.108	37B/AvB	0.323	113	2869.23	114	4185.75	115	4551.08
1	Q9TV62	Myosin-4 OS=Sus scrofa GN=MYH4 PE=2 SV=1	30936	287893	1373	1373	114	114	109050	1	1	0	832.442	1662.87	2	1662.87	-0.0047	0	34.22	0.0027	R	VAEQELLDASER	V				Cmpd 12209, AutoMSn(832.4415), 137.6 min (13229323981766910)	13A/AvB	1.804	16A/AvB	0.08	27A/AvB	0.904	29A/AvB	0.007	10B/AvB	0.414	21B/AvB	0.13	25B/AvB	-0.051	37B/AvB	0.507	113	5307.03	114	23123.7	115	1024.75
1	Q9TV62	Myosin-4 OS=Sus scrofa GN=MYH4 PE=2 SV=1	30936	287893	1373	1373	114	114	109051	1	1	0	555.297	1662.87	3	1662.87	-0.0047	0	54.56	2.5e-05	R	VAEQELLDASER	V				Cmpd 11897, AutoMSn(555.2967), 132.5 min (13229323981863148)	13A/AvB	0.145	16A/AvB	0.241	27A/AvB	0.132	29A/AvB	0.121	10B/AvB	0.575	21B/AvB	0.242	25B/AvB	0.085	37B/AvB	0.098	113	71981.7	114	18153.2	115	30214.2
1	Q9TV62	Myosin-4 OS=Sus scrofa GN=MYH4 PE=2 SV=1	30936	287893	1373	1373	114	114	109052	1	1	0	832.442	1662.87	2	1662.87	-0.0045	0	25.82	0.018	R	VAEQELLDASER	V				Cmpd 12114, AutoMSn(832.4416), 135.0 min (13229323981552844)	13A/AvB	0.189	16A/AvB	0.347	27A/AvB	0.115	29A/AvB	0.213	10B/AvB	0.182	21B/AvB	0.487	25B/AvB	0.136	37B/AvB	0.195	113	4643.76	114	4823.44	115	8842.92
1	Q9TV62	Myosin-4 OS=Sus scrofa GN=MYH4 PE=2 SV=1	30936	287893	1373	1373	114	114	109053	1	1	0	832.442	1662.87	2	1662.87	-0.0043	0	52.19	4.2e-05	R	VAEQELLDASER	V				Cmpd 12164, AutoMSn(832.4416), 137.3 min (13229323981717731)	13A/AvB	0.221	16A/AvB	0.317	27A/AvB	0.23	29A/AvB	0.224	10B/AvB	0.192	21B/AvB	0.355	25B/AvB	0.114	37B/AvB	0.34	113	4778.97	114	5507.63	115	7906.24
1	Q9TV62	Myosin-4 OS=Sus scrofa GN=MYH4 PE=2 SV=1	30936	287893	1373	1373	114	114	109054	1	1	0	555.297	1662.87	3	1662.87	-0.0043	0	44.92	0.00014	R	VAEQELLDASER	V				Cmpd 12131, AutoMSn(555.2969), 136.7 min (13229323981766754)	13A/AvB	-0.112	16A/AvB	1.576	27A/AvB	1.4	29A/AvB	-0.029	10B/AvB	1.078	21B/AvB	-0.006	25B/AvB	-0.072	37B/AvB	0	113	14726.3	114	-1526.31	115	21533
1	Q9TV62	Myosin-4 OS=Sus scrofa GN=MYH4 PE=2 SV=1	30936	287893	1373	1373	114	114	109055	1	1	0	832.442	1662.87	2	1662.87	-0.004	0	48.46	9.8e-05	R	VAEQELLDASER	V				Cmpd 12029, AutoMSn(832.4419), 135.6 min (13229323981766550)	13A/AvB	0.681	16A/AvB	2.622	27A/AvB	-0.035	29A/AvB	0.586	10B/AvB	0.459	21B/AvB	0.021	25B/AvB	-0.003	37B/AvB	0.522	113	4177.65	114	6193.48	115	23841.4
1	Q9TV62	Myosin-4 OS=Sus scrofa GN=MYH4 PE=2 SV=1	30936	287893	1373	1373	114	114	109056	1	1	0	555.297	1662.87	3	1662.87	-0.0039	0	30.67	0.0013	R	VAEQELLDASER	V				Cmpd 11950, AutoMSn(555.2970), 133.1 min (13229323981863254)	13A/AvB	0.166	16A/AvB	0.263	27A/AvB	0.214	29A/AvB	0.155	10B/AvB	0.497	21B/AvB	0.281	25B/AvB	0.098	37B/AvB	0.124	113	52191.7	114	17403.1	115	27611.1
1	Q9TV62	Myosin-4 OS=Sus scrofa GN=MYH4 PE=2 SV=1	30936	287893	1373	1373	114	114	109057	1	1	0	555.297	1662.87	3	1662.87	-0.0036	0	39.94	0.00044	R	VAEQELLDASER	V				Cmpd 11825, AutoMSn(555.2971), 131.7 min (13229323981863004)	13A/AvB	0.067	16A/AvB	0.158	27A/AvB	0.078	29A/AvB	0.061	10B/AvB	0.674	21B/AvB	0.198	25B/AvB	0.063	37B/AvB	0.065	113	185425	114	18520.7	115	43511.2
1	Q9TV62	Myosin-4 OS=Sus scrofa GN=MYH4 PE=2 SV=1	30936	287893	1373	1373	114	114	109058	1	1	0	832.442	1662.87	2	1662.87	-0.0035	0	42.63	0.00011	R	VAEQELLDASER	V				Cmpd 12020, AutoMSn(832.4421), 135.6 min (13229323981717443)	13A/AvB	0.206	16A/AvB	0.286	27A/AvB	0.206	29A/AvB	0.239	10B/AvB	0.18	21B/AvB	0.326	25B/AvB	0.21	37B/AvB	0.285	113	11580.6	114	13307.4	115	18413.4
1	Q9TV62	Myosin-4 OS=Sus scrofa GN=MYH4 PE=2 SV=1	30936	287893	1373	1373	114	114	109059	1	1	0	832.442	1662.87	2	1662.87	-0.0035	0	56.11	1.9e-05	R	VAEQELLDASER	V				Cmpd 12065, AutoMSn(832.4421), 136.0 min (13229323981766622)	13A/AvB	0.315	16A/AvB	-0.016	27A/AvB	0.003	29A/AvB	-0.001	10B/AvB	0.146	21B/AvB	0.712	25B/AvB	-0.023	37B/AvB	0.165	113	20163.9	114	43593.1	115	-2174.29
1	Q9TV62	Myosin-4 OS=Sus scrofa GN=MYH4 PE=2 SV=1	30936	287893	1373	1373	114	114	109060	1	1	0	555.297	1662.87	3	1662.87	-0.0034	0	49.39	8.6e-05	R	VAEQELLDASER	V				Cmpd 12135, AutoMSn(555.2972), 134.4 min (13229323981814963)	13A/AvB	0.152	16A/AvB	0.259	27A/AvB	0.232	29A/AvB	0.185	10B/AvB	0.264	21B/AvB	0.4	25B/AvB	0.148	37B/AvB	0.187	113	36001.7	114	20768.3	115	35368.4
1	Q9TV62	Myosin-4 OS=Sus scrofa GN=MYH4 PE=2 SV=1	30936	287893	1373	1373	114	114	109061	1	1	0	832.442	1662.87	2	1662.87	-0.0034	0	49.22	9e-05	R	VAEQELLDASER	V				Cmpd 12021, AutoMSn(832.4422), 133.1 min (13229323981814735)	13A/AvB	0.247	16A/AvB	0.29	27A/AvB	0.207	29A/AvB	0.208	10B/AvB	0.208	21B/AvB	0.361	25B/AvB	0.175	37B/AvB	0.256	113	19864.9	114	23559.9	115	27692.2
1	Q9TV62	Myosin-4 OS=Sus scrofa GN=MYH4 PE=2 SV=1	30936	287893	1373	1373	114	114	109063	1	1	0	832.442	1662.87	2	1662.87	-0.0031	0	50.91	5.9e-05	R	VAEQELLDASER	V				Cmpd 11783, AutoMSn(832.4423), 131.2 min (13229323981862920)	13A/AvB	0.229	16A/AvB	0.33	27A/AvB	0.245	29A/AvB	0.228	10B/AvB	0.225	21B/AvB	0.321	25B/AvB	0.148	37B/AvB	0.306	113	11414.4	114	11643.3	115	16771.8
1	Q9TV62	Myosin-4 OS=Sus scrofa GN=MYH4 PE=2 SV=1	30936	287893	1373	1373	114	114	109065	1	1	0	832.442	1662.87	2	1662.87	-0.003	0	57.84	1.2e-05	R	VAEQELLDASER	V				Cmpd 12140, AutoMSn(832.4423), 135.4 min (13229323981552896)	13A/AvB	0.291	16A/AvB	0.243	27A/AvB	0.211	29A/AvB	0.279	10B/AvB	0.233	21B/AvB	0.314	25B/AvB	0.188	37B/AvB	0.264	113	15290.7	114	19100.1	115	15925.8
1	Q9TV62	Myosin-4 OS=Sus scrofa GN=MYH4 PE=2 SV=1	30936	287893	1373	1373	114	114	109066	1	1	0	832.442	1662.87	2	1662.87	-0.003	0	53.19	3.5e-05	R	VAEQELLDASER	V				Cmpd 12137, AutoMSn(832.4423), 136.8 min (13229323981766766)	13A/AvB	0.138	16A/AvB	0.167	27A/AvB	0	29A/AvB	0.001	10B/AvB	0.134	21B/AvB	0.673	25B/AvB	-0.028	37B/AvB	0.221	113	30635.4	114	31582.7	115	38153.3
1	Q9TV62	Myosin-4 OS=Sus scrofa GN=MYH4 PE=2 SV=1	30936	287893	1373	1373	114	114	109068	1	1	0	832.442	1662.87	2	1662.87	-0.0028	0	30.35	0.0017	R	VAEQELLDASER	V				Cmpd 12329, AutoMSn(832.4425), 137.5 min (13229323981553274)	13A/AvB	0.188	16A/AvB	0.413	27A/AvB	0.277	29A/AvB	0.236	10B/AvB	0.262	21B/AvB	0.358	25B/AvB	0.108	37B/AvB	0.272	113	7987.57	114	5738.34	115	12606.2
1	Q9TV62	Myosin-4 OS=Sus scrofa GN=MYH4 PE=2 SV=1	30936	287893	1373	1373	114	114	109070	1	1	0	555.298	1662.87	3	1662.87	-0.0025	0	31.76	0.0011	R	VAEQELLDASER	V				Cmpd 12271, AutoMSn(555.2975), 136.8 min (13229323981553158)	13A/AvB	0.197	16A/AvB	0.344	27A/AvB	0.239	29A/AvB	0.181	10B/AvB	0.305	21B/AvB	0.459	25B/AvB	0.144	37B/AvB	0.091	113	10708.7	114	6896.14	115	12061.7
1	Q9TV62	Myosin-4 OS=Sus scrofa GN=MYH4 PE=2 SV=1	30936	287893	1373	1373	114	114	109071	1	1	0	832.443	1662.87	2	1662.87	-0.0024	0	53.87	3e-05	R	VAEQELLDASER	V				Cmpd 12092, AutoMSn(832.4426), 136.5 min (13229323981717587)	13A/AvB	0.21	16A/AvB	0.227	27A/AvB	0.213	29A/AvB	0.208	10B/AvB	0.189	21B/AvB	0.295	25B/AvB	0.221	37B/AvB	0.295	113	21530.3	114	23915.2	115	25822.6
1	Q9TV62	Myosin-4 OS=Sus scrofa GN=MYH4 PE=2 SV=1	30936	287893	1373	1373	114	114	109072	1	1	0	555.298	1662.87	3	1662.87	-0.0023	0	28.51	0.0021	R	VAEQELLDASER	V				Cmpd 12081, AutoMSn(555.2975), 136.3 min (13229323981717565)	13A/AvB	0.193	16A/AvB	0.348	27A/AvB	0.345	29A/AvB	0.252	10B/AvB	0.406	21B/AvB	0.289	25B/AvB	0.165	37B/AvB	0.14	113	4159.96	114	1983.04	115	3572.11
1	Q9TV62	Myosin-4 OS=Sus scrofa GN=MYH4 PE=2 SV=1	30936	287893	1373	1373	114	114	109073	1	1	0	832.443	1662.87	2	1662.87	-0.0021	0	48.85	9.5e-05	R	VAEQELLDASER	V				Cmpd 11957, AutoMSn(832.4427), 133.2 min (13229323981863268)	13A/AvB	0.225	16A/AvB	0.244	27A/AvB	0.19	29A/AvB	0.221	10B/AvB	0.192	21B/AvB	0.346	25B/AvB	0.195	37B/AvB	0.267	113	19611.8	114	23032.2	115	24934
1	Q9TV62	Myosin-4 OS=Sus scrofa GN=MYH4 PE=2 SV=1	30936	287893	1373	1373	114	114	109074	1	1	0	832.443	1662.87	2	1662.87	-0.002	0	64.32	2.7e-06	R	VAEQELLDASER	V				Cmpd 12057, AutoMSn(832.4428), 133.5 min (13229323981814807)	13A/AvB	0.206	16A/AvB	0.225	27A/AvB	0.192	29A/AvB	0.21	10B/AvB	0.222	21B/AvB	0.293	25B/AvB	0.192	37B/AvB	0.293	113	67379.9	114	62370.2	115	68258.3
1	Q9TV62	Myosin-4 OS=Sus scrofa GN=MYH4 PE=2 SV=1	30936	287893	1373	1373	114	114	109075	1	1	0	832.443	1662.87	2	1662.87	-0.002	0	50.86	5.9e-05	R	VAEQELLDASER	V				Cmpd 11885, AutoMSn(832.4428), 132.4 min (13229323981863124)	13A/AvB	0.213	16A/AvB	0.229	27A/AvB	0.202	29A/AvB	0.21	10B/AvB	0.232	21B/AvB	0.312	25B/AvB	0.189	37B/AvB	0.267	113	65182.6	114	59880.5	115	64363
1	Q9TV62	Myosin-4 OS=Sus scrofa GN=MYH4 PE=2 SV=1	30936	287893	1373	1373	114	114	109076	1	1	0	832.443	1662.87	2	1662.87	-0.002	0	52.98	3.6e-05	R	VAEQELLDASER	V				Cmpd 12129, AutoMSn(832.4428), 134.3 min (13229323981814951)	13A/AvB	0.21	16A/AvB	0.216	27A/AvB	0.204	29A/AvB	0.222	10B/AvB	0.225	21B/AvB	0.318	25B/AvB	0.181	37B/AvB	0.276	113	78347.6	114	73043.5	115	75075.2
1	Q9TV62	Myosin-4 OS=Sus scrofa GN=MYH4 PE=2 SV=1	30936	287893	1373	1373	114	114	109077	1	1	0	832.443	1662.87	2	1662.87	-0.0019	0	49.31	8.4e-05	R	VAEQELLDASER	V				Cmpd 11813, AutoMSn(832.4429), 131.6 min (13229323981862980)	13A/AvB	0.234	16A/AvB	0.246	27A/AvB	0.211	29A/AvB	0.228	10B/AvB	0.234	21B/AvB	0.315	25B/AvB	0.172	37B/AvB	0.279	113	44002	114	43977.2	115	46248.9
1	Q9TV62	Myosin-4 OS=Sus scrofa GN=MYH4 PE=2 SV=1	30936	287893	1373	1373	114	114	109078	1	1	0	832.443	1662.87	2	1662.87	-0.0014	0	51.74	4.8e-05	R	VAEQELLDASER	V				Cmpd 12254, AutoMSn(832.4431), 136.6 min (13229323981553124)	13A/AvB	0.207	16A/AvB	0.224	27A/AvB	0.199	29A/AvB	0.206	10B/AvB	0.208	21B/AvB	0.328	25B/AvB	0.18	37B/AvB	0.284	113	48501	114	48201.9	115	52154.7
1	Q9TV62	Myosin-4 OS=Sus scrofa GN=MYH4 PE=2 SV=1	30936	287893	1373	1373	114	114	109079	1	1	0	832.443	1662.87	2	1662.87	-0.0012	0	52.45	4.3e-05	R	VAEQELLDASER	V				Cmpd 12182, AutoMSn(832.4432), 135.8 min (13229323981552980)	13A/AvB	0.203	16A/AvB	0.198	27A/AvB	0.208	29A/AvB	0.215	10B/AvB	0.194	21B/AvB	0.33	25B/AvB	0.191	37B/AvB	0.285	113	44303	114	46362	115	45260.4
1	Q9TV62	Myosin-4 OS=Sus scrofa GN=MYH4 PE=2 SV=1	30936	287893	1373	1373	114	114	109080	1	1	0	555.298	1662.87	3	1662.87	-0.0008	0	34.07	0.00091	R	VAEQELLDASER	V				Cmpd 12194, AutoMSn(555.2981), 136.0 min (13229323981553004)	13A/AvB	0.272	16A/AvB	0.351	27A/AvB	0.223	29A/AvB	0.2	10B/AvB	0.285	21B/AvB	0.423	25B/AvB	0.129	37B/AvB	0.164	113	11368.3	114	10874.1	115	14031.2
1	Q9TV62	Myosin-4 OS=Sus scrofa GN=MYH4 PE=2 SV=1	30936	287893	1373	1373	114	114	109082	1	1	0	555.298	1662.87	3	1662.87	0.0001	0	21.98	0.0087	R	VAEQELLDASER	V				Cmpd 12060, AutoMSn(555.2983), 135.9 min (13229323981766612)	13A/AvB	-0.072	16A/AvB	0.989	27A/AvB	0.316	29A/AvB	0.302	10B/AvB	0.702	21B/AvB	0.133	25B/AvB	-0.023	37B/AvB	0.188	113	10707.8	114	-1098.17	115	15081.5
1	Q9TV62	Myosin-4 OS=Sus scrofa GN=MYH4 PE=2 SV=1	30936	287893	1373	1373	114	114	109205	1	1	1	416.983	1663.9	4	1663.91	-0.0079	1	14.65	0.042	K	TKEEEHQR	L				Cmpd 2697, AutoMSn(416.9829), 31.2 min (13229323981844748)	13A/AvB	0.259	16A/AvB	0.204	27A/AvB	0.325	29A/AvB	0.183	10B/AvB	0.219	21B/AvB	0.316	25B/AvB	0.187	37B/AvB	0.277	113	5428.65	114	6426.74	115	5058.17
1	Q9TV62	Myosin-4 OS=Sus scrofa GN=MYH4 PE=2 SV=1	30936	287893	1373	1373	114	114	109206	1	1	1	416.983	1663.9	4	1663.91	-0.0074	1	15.82	0.033	K	TKEEEHQR	L				Cmpd 2709, AutoMSn(416.9830), 31.3 min (13229323981844772)	13A/AvB	0.187	16A/AvB	0.196	27A/AvB	0.219	29A/AvB	0.164	10B/AvB	0.238	21B/AvB	0.312	25B/AvB	0.192	37B/AvB	0.258	113	24218.2	114	18996.7	115	19916.6
1	Q9TV62	Myosin-4 OS=Sus scrofa GN=MYH4 PE=2 SV=1	30936	287893	1373	1373	114	114	109209	1	1	1	416.983	1663.9	4	1663.91	-0.0057	1	18.5	0.018	K	TKEEEHQR	L				Cmpd 2708, AutoMSn(416.9834), 31.3 min (13229323981844770)	13A/AvB	0.178	16A/AvB	0.21	27A/AvB	0.286	29A/AvB	0.216	10B/AvB	0.177	21B/AvB	0.356	25B/AvB	0.161	37B/AvB	0.306	113	10330.9	114	10395.8	115	12242.2
1	Q9TV62	Myosin-4 OS=Sus scrofa GN=MYH4 PE=2 SV=1	30936	287893	1373	1373	114	114	109735	1	1	0	841.976	1681.94	2	1681.95	-0.0086	0	23.87	0.0058	R	ADIAESQVNK	L				Cmpd 8430, AutoMSn(841.9760), 94.7 min (13229323981759352)	13A/AvB	0.368	16A/AvB	-0.014	27A/AvB	0.52	29A/AvB	-0.012	10B/AvB	0.216	21B/AvB	0.499	25B/AvB	-0.03	37B/AvB	0.315	113	4458.42	114	7602.52	115	-294.29
1	Q9TV62	Myosin-4 OS=Sus scrofa GN=MYH4 PE=2 SV=1	30936	287893	1373	1373	114	114	109736	1	1	0	561.653	1681.94	3	1681.95	-0.0082	0	47.19	3.8e-05	R	ADIAESQVNK	L				Cmpd 8437, AutoMSn(561.6532), 93.6 min (13229323981545490)	13A/AvB	0.265	16A/AvB	0.49	27A/AvB	0.221	29A/AvB	0.197	10B/AvB	0.308	21B/AvB	0.407	25B/AvB	0.124	37B/AvB	0.161	113	19082	114	16445.3	115	30377.8
1	Q9TV62	Myosin-4 OS=Sus scrofa GN=MYH4 PE=2 SV=1	30936	287893	1373	1373	114	114	109737	1	1	0	841.976	1681.94	2	1681.95	-0.0082	0	27.88	0.0024	R	ADIAESQVNK	L				Cmpd 8410, AutoMSn(841.9762), 94.5 min (13229323981710223)	13A/AvB	0.059	16A/AvB	0.25	27A/AvB	0.209	29A/AvB	0.183	10B/AvB	0.239	21B/AvB	0.288	25B/AvB	0.29	37B/AvB	0.183	113	3634.68	114	901.097	115	3805.84
1	Q9TV62	Myosin-4 OS=Sus scrofa GN=MYH4 PE=2 SV=1	30936	287893	1373	1373	114	114	109738	1	1	0	561.653	1681.94	3	1681.95	-0.008	0	50.54	1.8e-05	R	ADIAESQVNK	L				Cmpd 8049, AutoMSn(561.6533), 89.7 min (13229323981855452)	13A/AvB	0.196	16A/AvB	0.257	27A/AvB	0.21	29A/AvB	0.264	10B/AvB	0.29	21B/AvB	0.307	25B/AvB	0.184	37B/AvB	0.219	113	111759	114	75482	115	99021
1	Q9TV62	Myosin-4 OS=Sus scrofa GN=MYH4 PE=2 SV=1	30936	287893	1373	1373	114	114	109739	1	1	0	561.653	1681.94	3	1681.95	-0.008	0	52.21	1.4e-05	R	ADIAESQVNK	L				Cmpd 8122, AutoMSn(561.6533), 90.5 min (13229323981855598)	13A/AvB	0.212	16A/AvB	0.283	27A/AvB	0.24	29A/AvB	0.256	10B/AvB	0.273	21B/AvB	0.311	25B/AvB	0.174	37B/AvB	0.242	113	71388	114	55526.3	115	74038.3
1	Q9TV62	Myosin-4 OS=Sus scrofa GN=MYH4 PE=2 SV=1	30936	287893	1373	1373	114	114	109740	1	1	0	561.653	1681.94	3	1681.95	-0.008	0	62.94	4e-06	R	ADIAESQVNK	L				Cmpd 8298, AutoMSn(561.6532), 91.6 min (13229323981807289)	13A/AvB	0.228	16A/AvB	0.272	27A/AvB	0.243	29A/AvB	0.227	10B/AvB	0.31	21B/AvB	0.304	25B/AvB	0.174	37B/AvB	0.212	113	64118	114	47188.7	115	56210.8
1	Q9TV62	Myosin-4 OS=Sus scrofa GN=MYH4 PE=2 SV=1	30936	287893	1373	1373	114	114	109741	1	1	0	841.976	1681.94	2	1681.95	-0.0079	0	29.59	0.0017	R	ADIAESQVNK	L				Cmpd 8462, AutoMSn(841.9763), 93.9 min (13229323981545540)	13A/AvB	0.189	16A/AvB	0.205	27A/AvB	0.165	29A/AvB	0.183	10B/AvB	0.26	21B/AvB	0.353	25B/AvB	0.166	37B/AvB	0.221	113	9167.11	114	6649.6	115	7247.85
1	Q9TV62	Myosin-4 OS=Sus scrofa GN=MYH4 PE=2 SV=1	30936	287893	1373	1373	114	114	109742	1	1	0	561.653	1681.94	3	1681.95	-0.0079	0	55.16	6.7e-06	R	ADIAESQVNK	L				Cmpd 8390, AutoMSn(561.6533), 94.3 min (13229323981710183)	13A/AvB	0.228	16A/AvB	0.303	27A/AvB	0.259	29A/AvB	0.236	10B/AvB	0.323	21B/AvB	0.321	25B/AvB	0.131	37B/AvB	0.226	113	18346.1	114	12980.9	115	17218
1	Q9TV62	Myosin-4 OS=Sus scrofa GN=MYH4 PE=2 SV=1	30936	287893	1373	1373	114	114	109743	1	1	0	561.653	1681.94	3	1681.95	-0.0077	0	55.5	6.2e-06	R	ADIAESQVNK	L				Cmpd 8399, AutoMSn(561.6534), 94.3 min (13229323981759290)	13A/AvB	-0.038	16A/AvB	1.567	27A/AvB	0.013	29A/AvB	0.011	10B/AvB	0.623	21B/AvB	0.053	25B/AvB	0.009	37B/AvB	0.315	113	35928.1	114	-2173.18	115	90298.5
1	Q9TV62	Myosin-4 OS=Sus scrofa GN=MYH4 PE=2 SV=1	30936	287893	1373	1373	114	114	109744	1	1	0	561.653	1681.94	3	1681.95	-0.0077	0	45.2	5.8e-05	R	ADIAESQVNK	L				Cmpd 8471, AutoMSn(561.6534), 95.1 min (13229323981759434)	13A/AvB	0.34	16A/AvB	2.386	27A/AvB	0.019	29A/AvB	-0.002	10B/AvB	0.489	21B/AvB	0.088	25B/AvB	-0.007	37B/AvB	0.43	113	20769.3	114	14416.9	115	101238
1	Q9TV62	Myosin-4 OS=Sus scrofa GN=MYH4 PE=2 SV=1	30936	287893	1373	1373	114	114	109745	1	1	0	561.654	1681.94	3	1681.95	-0.0073	0	43.96	7.5e-05	R	ADIAESQVNK	L				Cmpd 8532, AutoMSn(561.6535), 94.7 min (13229323981545680)	13A/AvB	0.183	16A/AvB	0.29	27A/AvB	0.216	29A/AvB	0.228	10B/AvB	0.276	21B/AvB	0.341	25B/AvB	0.152	37B/AvB	0.232	113	27070.9	114	18010.2	115	28473
1	Q9TV62	Myosin-4 OS=Sus scrofa GN=MYH4 PE=2 SV=1	30936	287893	1373	1373	114	114	109746	1	1	0	561.654	1681.94	3	1681.95	-0.0073	0	51.34	1.5e-05	R	ADIAESQVNK	L				Cmpd 8370, AutoMSn(561.6535), 92.4 min (13229323981807433)	13A/AvB	0.209	16A/AvB	0.268	27A/AvB	0.262	29A/AvB	0.254	10B/AvB	0.32	21B/AvB	0.319	25B/AvB	0.155	37B/AvB	0.206	113	58939.9	114	38560.8	115	49334.5
1	Q9TV62	Myosin-4 OS=Sus scrofa GN=MYH4 PE=2 SV=1	30936	287893	1373	1373	114	114	109747	1	1	0	561.654	1681.94	3	1681.95	-0.0073	0	52.46	1.4e-05	R	ADIAESQVNK	L				Cmpd 8072, AutoMSn(561.6535), 90.0 min (13229323981855498)	13A/AvB	0.207	16A/AvB	0.219	27A/AvB	0.229	29A/AvB	0.273	10B/AvB	0.274	21B/AvB	0.275	25B/AvB	0.193	37B/AvB	0.258	113	212231	114	159666	115	169552
1	Q9TV62	Myosin-4 OS=Sus scrofa GN=MYH4 PE=2 SV=1	30936	287893	1373	1373	114	114	109748	1	1	0	561.654	1681.94	3	1681.95	-0.0071	0	50.66	1.8e-05	R	ADIAESQVNK	L				Cmpd 8462, AutoMSn(561.6536), 95.1 min (13229323981710327)	13A/AvB	0.178	16A/AvB	0.29	27A/AvB	0.194	29A/AvB	0.268	10B/AvB	0.241	21B/AvB	0.331	25B/AvB	0.182	37B/AvB	0.246	113	13658.9	114	10106.9	115	16463.7
1	Q9TV62	Myosin-4 OS=Sus scrofa GN=MYH4 PE=2 SV=1	30936	287893	1373	1373	114	114	109749	1	1	0	841.977	1681.94	2	1681.95	-0.0069	0	30	0.0015	R	ADIAESQVNK	L				Cmpd 8060, AutoMSn(841.9768), 89.8 min (13229323981855474)	13A/AvB	0.151	16A/AvB	0.234	27A/AvB	0.215	29A/AvB	0.253	10B/AvB	0.277	21B/AvB	0.291	25B/AvB	0.218	37B/AvB	0.214	113	34796.7	114	18968.7	115	29339.4
1	Q9TV62	Myosin-4 OS=Sus scrofa GN=MYH4 PE=2 SV=1	30936	287893	1373	1373	114	114	109750	1	1	0	841.977	1681.94	2	1681.95	-0.0068	0	35.28	0.00074	R	ADIAESQVNK	L				Cmpd 8310, AutoMSn(841.9769), 91.7 min (13229323981807313)	13A/AvB	0.182	16A/AvB	0.228	27A/AvB	0.214	29A/AvB	0.252	10B/AvB	0.241	21B/AvB	0.306	25B/AvB	0.217	37B/AvB	0.236	113	17632.1	114	13302.7	115	16684.5
1	Q9TV62	Myosin-4 OS=Sus scrofa GN=MYH4 PE=2 SV=1	30936	287893	1373	1373	114	114	109751	1	1	0	561.654	1681.94	3	1681.95	-0.0064	0	67.99	1.6e-06	R	ADIAESQVNK	L				Cmpd 8460, AutoMSn(561.6538), 93.9 min (13229323981545536)	13A/AvB	0.231	16A/AvB	0.294	27A/AvB	0.253	29A/AvB	0.24	10B/AvB	0.278	21B/AvB	0.314	25B/AvB	0.164	37B/AvB	0.244	113	39102.3	114	32521.4	115	41328.2
1	Q9TV62	Myosin-4 OS=Sus scrofa GN=MYH4 PE=2 SV=1	30936	287893	1373	1373	114	114	109844	1	1	0	562.956	1685.85	3	1685.85	-0.0052	0	20.4	0.036	K	LQHELEEAEER	A				Cmpd 11539, AutoMSn(562.9564), 128.5 min (13229323981862432)	13A/AvB	0.194	16A/AvB	0.296	27A/AvB	0.313	29A/AvB	0.19	10B/AvB	0.288	21B/AvB	0.387	25B/AvB	0.204	37B/AvB	0.121	113	15069	114	10150.9	115	15502.9
1	Q9TV62	Myosin-4 OS=Sus scrofa GN=MYH4 PE=2 SV=1	30936	287893	1373	1373	114	114	109846	1	1	0	562.957	1685.85	3	1685.85	-0.0034	0	22.17	0.024	K	LQHELEEAEER	A				Cmpd 11610, AutoMSn(562.9571), 129.3 min (13229323981862574)	13A/AvB	0.198	16A/AvB	0.306	27A/AvB	0.293	29A/AvB	0.16	10B/AvB	0.288	21B/AvB	0.38	25B/AvB	0.185	37B/AvB	0.146	113	14254.4	114	9778	115	15124.1
1	Q9TV62	Myosin-4 OS=Sus scrofa GN=MYH4 PE=2 SV=1	30936	287893	1373	1373	114	114	109973	1	1	0	847.022	1692.03	2	1692.04	-0.0093	0	23.98	0.041	R	IQLELNQVK	S				Cmpd 13358, AutoMSn(847.0224), 150.9 min (13229323981720119)	13A/AvB	0.318	16A/AvB	0.178	27A/AvB	0.247	29A/AvB	0.255	10B/AvB	0.221	21B/AvB	0.203	25B/AvB	0.375	37B/AvB	0.201	113	1927.3	114	2778.52	115	1552.23
1	Q9TV62	Myosin-4 OS=Sus scrofa GN=MYH4 PE=2 SV=1	30936	287893	1373	1373	114	114	109974	1	1	0	565.018	1692.03	3	1692.04	-0.009	0	27.28	0.0028	R	IQLELNQVK	S				Cmpd 13337, AutoMSn(565.0175), 148.9 min (13229323981555290)	13A/AvB	0.321	16A/AvB	0.442	27A/AvB	0.213	29A/AvB	0.127	10B/AvB	0.312	21B/AvB	0.321	25B/AvB	0.226	37B/AvB	0.141	113	8706.76	114	8939.99	115	12335.8
1	Q9TV62	Myosin-4 OS=Sus scrofa GN=MYH4 PE=2 SV=1	30936	287893	1373	1373	114	114	109975	1	1	0	565.018	1692.03	3	1692.04	-0.0088	0	45.77	5.8e-05	R	IQLELNQVK	S				Cmpd 13376, AutoMSn(565.0175), 151.1 min (13229323981720155)	13A/AvB	0.188	16A/AvB	0.178	27A/AvB	0.168	29A/AvB	0.224	10B/AvB	0.234	21B/AvB	0.385	25B/AvB	0.106	37B/AvB	0.275	113	4797.79	114	3861.01	115	3654.06
1	Q9TV62	Myosin-4 OS=Sus scrofa GN=MYH4 PE=2 SV=1	30936	287893	1373	1373	114	114	109976	1	1	0	565.018	1692.03	3	1692.04	-0.0088	0	25.63	0.0039	R	IQLELNQVK	S				Cmpd 13289, AutoMSn(565.0175), 147.3 min (13229323981817271)	13A/AvB	0.255	16A/AvB	0.366	27A/AvB	0.275	29A/AvB	0.225	10B/AvB	0.321	21B/AvB	0.338	25B/AvB	0.168	37B/AvB	0.174	113	20829.3	114	16578.9	115	23747.2
1	Q9TV62	Myosin-4 OS=Sus scrofa GN=MYH4 PE=2 SV=1	30936	287893	1373	1373	114	114	109977	1	1	0	565.018	1692.03	3	1692.04	-0.0084	0	35.65	0.00045	R	IQLELNQVK	S				Cmpd 12890, AutoMSn(565.0177), 143.7 min (13229323981865134)	13A/AvB	0.283	16A/AvB	0.303	27A/AvB	0.214	29A/AvB	0.145	10B/AvB	0.312	21B/AvB	0.322	25B/AvB	0.196	37B/AvB	0.17	113	14190.9	114	12864.1	115	13755.7
1	Q9TV62	Myosin-4 OS=Sus scrofa GN=MYH4 PE=2 SV=1	30936	287893	1373	1373	114	114	109978	1	1	0	565.018	1692.03	3	1692.04	-0.0082	0	41.1	0.00017	R	IQLELNQVK	S				Cmpd 13464, AutoMSn(565.0177), 149.3 min (13229323981817621)	13A/AvB	0.183	16A/AvB	0.292	27A/AvB	0.218	29A/AvB	0.252	10B/AvB	0.326	21B/AvB	0.265	25B/AvB	0.186	37B/AvB	0.223	113	19775.5	114	11113.1	115	17672.9
1	Q9TV62	Myosin-4 OS=Sus scrofa GN=MYH4 PE=2 SV=1	30936	287893	1373	1373	114	114	109979	1	1	0	565.018	1692.03	3	1692.04	-0.0082	0	52.85	4.3e-05	R	IQLELNQVK	S				Cmpd 13301, AutoMSn(565.0177), 147.5 min (13229323981817295)	13A/AvB	0.235	16A/AvB	0.271	27A/AvB	0.217	29A/AvB	0.167	10B/AvB	0.349	21B/AvB	0.237	25B/AvB	0.182	37B/AvB	0.231	113	45164.1	114	30440.5	115	35030.5
1	Q9TV62	Myosin-4 OS=Sus scrofa GN=MYH4 PE=2 SV=1	30936	287893	1373	1373	114	114	109980	1	1	0	847.023	1692.03	2	1692.04	-0.008	0	35.71	0.00045	R	IQLELNQVK	S				Cmpd 13325, AutoMSn(847.0230), 150.3 min (13229323981769142)	13A/AvB	-0.022	16A/AvB	-0.01	27A/AvB	0.35	29A/AvB	-0.008	10B/AvB	0.49	21B/AvB	0.345	25B/AvB	-0.032	37B/AvB	0.198	113	23387.2	114	-1032.39	115	-492.478
1	Q9TV62	Myosin-4 OS=Sus scrofa GN=MYH4 PE=2 SV=1	30936	287893	1373	1373	114	114	109981	1	1	0	565.018	1692.03	3	1692.04	-0.0079	0	46.86	0.00012	R	IQLELNQVK	S				Cmpd 13407, AutoMSn(565.0178), 149.7 min (13229323981555430)	13A/AvB	0.275	16A/AvB	0.242	27A/AvB	0.263	29A/AvB	0.185	10B/AvB	0.363	21B/AvB	0.279	25B/AvB	0.163	37B/AvB	0.195	113	16840.9	114	12751.5	115	11209.1
1	Q9TV62	Myosin-4 OS=Sus scrofa GN=MYH4 PE=2 SV=1	30936	287893	1373	1373	114	114	109982	1	1	0	565.018	1692.03	3	1692.04	-0.0079	0	36.65	0.00092	R	IQLELNQVK	S				Cmpd 13031, AutoMSn(565.0178), 145.3 min (13229323981865416)	13A/AvB	0.215	16A/AvB	0.274	27A/AvB	0.162	29A/AvB	0.197	10B/AvB	0.329	21B/AvB	0.313	25B/AvB	0.146	37B/AvB	0.213	113	26111.2	114	17077.2	115	21761.2
1	Q9TV62	Myosin-4 OS=Sus scrofa GN=MYH4 PE=2 SV=1	30936	287893	1373	1373	114	114	109983	1	1	0	847.023	1692.03	2	1692.04	-0.0074	0	39.09	0.00074	R	IQLELNQVK	S				Cmpd 13046, AutoMSn(847.0233), 145.5 min (13229323981865446)	13A/AvB	0.188	16A/AvB	0.226	27A/AvB	0.205	29A/AvB	0.293	10B/AvB	0.222	21B/AvB	0.309	25B/AvB	0.208	37B/AvB	0.261	113	7274.74	114	6164.79	115	7421.26
1	Q9TV62	Myosin-4 OS=Sus scrofa GN=MYH4 PE=2 SV=1	30936	287893	1373	1373	114	114	109984	1	1	0	565.018	1692.03	3	1692.04	-0.0073	0	35.9	0.00062	R	IQLELNQVK	S				Cmpd 13457, AutoMSn(565.0180), 151.8 min (13229323981769406)	13A/AvB	-0.077	16A/AvB	1.187	27A/AvB	0.696	29A/AvB	0.043	10B/AvB	0.714	21B/AvB	-0.062	25B/AvB	-0.034	37B/AvB	0.381	113	9238.02	114	-994.781	115	15353.6
1	Q9TV62	Myosin-4 OS=Sus scrofa GN=MYH4 PE=2 SV=1	30936	287893	1373	1373	114	114	109985	1	1	0	847.023	1692.03	2	1692.04	-0.0073	0	48.37	0.00013	R	IQLELNQVK	S				Cmpd 13286, AutoMSn(847.0234), 150.1 min (13229323981719975)	13A/AvB	0.233	16A/AvB	0.218	27A/AvB	0.204	29A/AvB	0.21	10B/AvB	0.277	21B/AvB	0.222	25B/AvB	0.227	37B/AvB	0.274	113	10439.7	114	8789.19	115	8231.82
1	Q9TV62	Myosin-4 OS=Sus scrofa GN=MYH4 PE=2 SV=1	30936	287893	1373	1373	114	114	109986	1	1	0	847.023	1692.03	2	1692.04	-0.0072	0	33.6	0.0024	R	IQLELNQVK	S				Cmpd 13136, AutoMSn(847.0234), 146.5 min (13229323981865626)	13A/AvB	0.194	16A/AvB	0.224	27A/AvB	0.145	29A/AvB	0.21	10B/AvB	0.253	21B/AvB	0.279	25B/AvB	0.164	37B/AvB	0.305	113	9368.19	114	7209.18	115	8297.77
1	Q9TV62	Myosin-4 OS=Sus scrofa GN=MYH4 PE=2 SV=1	30936	287893	1373	1373	114	114	109987	1	1	0	565.018	1692.03	3	1692.04	-0.0071	0	45.8	0.00013	R	IQLELNQVK	S				Cmpd 13295, AutoMSn(565.0181), 150.0 min (13229323981769082)	13A/AvB	-0.085	16A/AvB	1.648	27A/AvB	0	29A/AvB	-0.001	10B/AvB	0.697	21B/AvB	-0.012	25B/AvB	-0.001	37B/AvB	0.317	113	25270.8	114	-3079.51	115	59722.7
1	Q9TV62	Myosin-4 OS=Sus scrofa GN=MYH4 PE=2 SV=1	30936	287893	1373	1373	114	114	109988	1	1	0	565.018	1692.03	3	1692.04	-0.0071	0	55.56	2.5e-05	R	IQLELNQVK	S				Cmpd 13420, AutoMSn(565.0181), 149.8 min (13229323981555456)	13A/AvB	0.197	16A/AvB	0.178	27A/AvB	0.171	29A/AvB	0.181	10B/AvB	0.254	21B/AvB	0.317	25B/AvB	0.174	37B/AvB	0.255	113	22949.5	114	17749.4	115	16056
1	Q9TV62	Myosin-4 OS=Sus scrofa GN=MYH4 PE=2 SV=1	30936	287893	1373	1373	114	114	109990	1	1	0	847.024	1692.03	2	1692.04	-0.0069	0	40.84	0.00015	R	IQLELNQVK	S				Cmpd 13313, AutoMSn(847.0236), 147.6 min (13229323981817319)	13A/AvB	0.232	16A/AvB	0.266	27A/AvB	0.245	29A/AvB	0.176	10B/AvB	0.212	21B/AvB	0.324	25B/AvB	0.215	37B/AvB	0.25	113	9305.69	114	10192	115	11718.8
1	Q9TV62	Myosin-4 OS=Sus scrofa GN=MYH4 PE=2 SV=1	30936	287893	1373	1373	114	114	109991	1	1	0	565.018	1692.03	3	1692.04	-0.0066	0	41.07	0.00042	R	IQLELNQVK	S				Cmpd 13385, AutoMSn(565.0182), 151.0 min (13229323981769262)	13A/AvB	-0.019	16A/AvB	0.149	27A/AvB	0	29A/AvB	0.003	10B/AvB	0.24	21B/AvB	0.579	25B/AvB	-0.023	37B/AvB	0.203	113	39425.7	114	-3043.37	115	24463.2
1	Q9TV62	Myosin-4 OS=Sus scrofa GN=MYH4 PE=2 SV=1	30936	287893	1373	1373	114	114	109992	1	1	0	847.024	1692.03	2	1692.04	-0.0066	0	46.5	0.0002	R	IQLELNQVK	S				Cmpd 13503, AutoMSn(847.0237), 150.8 min (13229323981555622)	13A/AvB	0.161	16A/AvB	0.195	27A/AvB	0.169	29A/AvB	0.242	10B/AvB	0.256	21B/AvB	0.275	25B/AvB	0.178	37B/AvB	0.291	113	22978.4	114	14460.4	115	17477.6
1	Q9TV62	Myosin-4 OS=Sus scrofa GN=MYH4 PE=2 SV=1	30936	287893	1373	1373	114	114	109993	1	1	0	565.018	1692.03	3	1692.04	-0.0064	0	57.25	1.6e-05	R	IQLELNQVK	S				Cmpd 13268, AutoMSn(565.0183), 149.9 min (13229323981719939)	13A/AvB	0.173	16A/AvB	0.167	27A/AvB	0.144	29A/AvB	0.182	10B/AvB	0.331	21B/AvB	0.212	25B/AvB	0.186	37B/AvB	0.271	113	22022	114	11509.3	115	11118.6
1	Q9TV62	Myosin-4 OS=Sus scrofa GN=MYH4 PE=2 SV=1	30936	287893	1373	1373	114	114	109994	1	1	0	565.018	1692.03	3	1692.04	-0.0064	0	46.57	9.9e-05	R	IQLELNQVK	S				Cmpd 13515, AutoMSn(565.0183), 150.9 min (13229323981555646)	13A/AvB	0.177	16A/AvB	0.18	27A/AvB	0.192	29A/AvB	0.22	10B/AvB	0.245	21B/AvB	0.254	25B/AvB	0.201	37B/AvB	0.301	113	32923.3	114	23845.8	115	24200.4
1	Q9TV62	Myosin-4 OS=Sus scrofa GN=MYH4 PE=2 SV=1	30936	287893	1373	1373	114	114	109995	1	1	0	847.024	1692.03	2	1692.04	-0.0061	0	48.3	0.00013	R	IQLELNQVK	S				Cmpd 13431, AutoMSn(847.0240), 150.0 min (13229323981555478)	13A/AvB	0.242	16A/AvB	0.215	27A/AvB	0.172	29A/AvB	0.185	10B/AvB	0.285	21B/AvB	0.246	25B/AvB	0.199	37B/AvB	0.27	113	26367.4	114	22399.3	115	19891.6
1	Q9TV62	Myosin-4 OS=Sus scrofa GN=MYH4 PE=2 SV=1	30936	287893	1373	1373	114	114	109996	1	1	0	847.024	1692.03	2	1692.04	-0.0061	0	48.59	0.00012	R	IQLELNQVK	S				Cmpd 13063, AutoMSn(847.0240), 145.7 min (13229323981865480)	13A/AvB	0.192	16A/AvB	0.26	27A/AvB	0.193	29A/AvB	0.196	10B/AvB	0.244	21B/AvB	0.263	25B/AvB	0.175	37B/AvB	0.318	113	20521.4	114	16145.1	115	21866.6
1	Q9TV62	Myosin-4 OS=Sus scrofa GN=MYH4 PE=2 SV=1	30936	287893	1373	1373	114	114	109997	1	1	0	565.019	1692.03	3	1692.04	-0.0059	0	57.58	1.5e-05	R	IQLELNQVK	S				Cmpd 13043, AutoMSn(565.0185), 145.4 min (13229323981865440)	13A/AvB	0.158	16A/AvB	0.222	27A/AvB	0.174	29A/AvB	0.208	10B/AvB	0.309	21B/AvB	0.259	25B/AvB	0.191	37B/AvB	0.242	113	51407.7	114	26348.6	115	36906.3
1	Q9TV62	Myosin-4 OS=Sus scrofa GN=MYH4 PE=2 SV=1	30936	287893	1373	1373	114	114	109998	1	1	0	565.019	1692.03	3	1692.04	-0.0057	0	59.84	1.1e-05	R	IQLELNQVK	S				Cmpd 13313, AutoMSn(565.0185), 150.2 min (13229323981769118)	13A/AvB	-0.022	16A/AvB	-0.013	27A/AvB	-0.009	29A/AvB	0.156	10B/AvB	0.425	21B/AvB	0.424	25B/AvB	-0.017	37B/AvB	0.169	113	103522	114	-5431.61	115	-3047.06
1	Q9TV62	Myosin-4 OS=Sus scrofa GN=MYH4 PE=2 SV=1	30936	287893	1373	1373	114	114	109999	1	1	0	565.019	1692.03	3	1692.04	-0.0057	0	57.55	1.8e-05	R	IQLELNQVK	S				Cmpd 13319, AutoMSn(565.0186), 147.7 min (13229323981817331)	13A/AvB	0.235	16A/AvB	0.212	27A/AvB	0.198	29A/AvB	0.241	10B/AvB	0.274	21B/AvB	0.247	25B/AvB	0.209	37B/AvB	0.271	113	78524.1	114	67518	115	60742.9
1	Q9TV62	Myosin-4 OS=Sus scrofa GN=MYH4 PE=2 SV=1	30936	287893	1373	1373	114	114	110001	1	1	0	847.024	1692.03	2	1692.04	-0.0055	0	40.5	0.00061	R	IQLELNQVK	S				Cmpd 13415, AutoMSn(847.0243), 149.8 min (13229323981555446)	13A/AvB	0.329	16A/AvB	0.329	27A/AvB	0.247	29A/AvB	0.251	10B/AvB	0.258	21B/AvB	0.321	25B/AvB	0.172	37B/AvB	0.249	113	5772.38	114	7361.04	115	7367.76
1	Q9TV62	Myosin-4 OS=Sus scrofa GN=MYH4 PE=2 SV=1	30936	287893	1373	1373	114	114	110002	1	1	0	565.019	1692.03	3	1692.04	-0.0053	0	60.18	9.9e-06	R	IQLELNQVK	S				Cmpd 13134, AutoMSn(565.0187), 146.5 min (13229323981865622)	13A/AvB	0.176	16A/AvB	0.198	27A/AvB	0.197	29A/AvB	0.233	10B/AvB	0.264	21B/AvB	0.241	25B/AvB	0.196	37B/AvB	0.299	113	55210.2	114	36834.7	115	41478
1	Q9TV62	Myosin-4 OS=Sus scrofa GN=MYH4 PE=2 SV=1	30936	287893	1373	1373	114	114	110003	1	1	0	847.024	1692.03	2	1692.04	-0.0052	0	48.5	0.00015	R	IQLELNQVK	S				Cmpd 13338, AutoMSn(847.0244), 147.9 min (13229323981817369)	13A/AvB	0.193	16A/AvB	0.241	27A/AvB	0.175	29A/AvB	0.211	10B/AvB	0.248	21B/AvB	0.248	25B/AvB	0.235	37B/AvB	0.27	113	27199.5	114	21256.7	115	26449.6
1	Q9TV62	Myosin-4 OS=Sus scrofa GN=MYH4 PE=2 SV=1	30936	287893	1373	1373	114	114	110004	1	1	0	565.019	1692.03	3	1692.04	-0.0051	0	27.61	0.004	R	IQLELNQVK	S				Cmpd 13207, AutoMSn(565.0187), 147.3 min (13229323981865768)	13A/AvB	0.236	16A/AvB	0.368	27A/AvB	0.226	29A/AvB	0.2	10B/AvB	0.274	21B/AvB	0.307	25B/AvB	0.194	37B/AvB	0.224	113	9291.51	114	7975.59	115	12474
1	Q9TV62	Myosin-4 OS=Sus scrofa GN=MYH4 PE=2 SV=1	30936	287893	1373	1373	114	114	110005	1	1	0	565.019	1692.03	3	1692.04	-0.0049	0	59.94	1e-05	R	IQLELNQVK	S				Cmpd 13391, AutoMSn(565.0188), 148.5 min (13229323981817475)	13A/AvB	0.194	16A/AvB	0.179	27A/AvB	0.18	29A/AvB	0.237	10B/AvB	0.223	21B/AvB	0.271	25B/AvB	0.2	37B/AvB	0.307	113	66518.6	114	57890.9	115	53421.3
1	Q9TV62	Myosin-4 OS=Sus scrofa GN=MYH4 PE=2 SV=1	30936	287893	1373	1373	114	114	110006	1	1	0	565.019	1692.03	3	1692.04	-0.0048	0	60.17	1e-05	R	IQLELNQVK	S				Cmpd 13304, AutoMSn(565.0189), 150.3 min (13229323981720011)	13A/AvB	0.193	16A/AvB	0.234	27A/AvB	0.206	29A/AvB	0.254	10B/AvB	0.239	21B/AvB	0.246	25B/AvB	0.2	37B/AvB	0.315	113	38587.8	114	31226	115	37826.3
1	Q9TV62	Myosin-4 OS=Sus scrofa GN=MYH4 PE=2 SV=1	30936	287893	1373	1373	114	114	110007	1	1	0	565.019	1692.03	3	1692.04	-0.0048	0	60.02	1e-05	R	IQLELNQVK	S				Cmpd 13443, AutoMSn(565.0188), 150.1 min (13229323981555502)	13A/AvB	0.177	16A/AvB	0.198	27A/AvB	0.191	29A/AvB	0.201	10B/AvB	0.257	21B/AvB	0.253	25B/AvB	0.198	37B/AvB	0.292	113	67825.4	114	46656.9	115	52335.2
1	Q9TV62	Myosin-4 OS=Sus scrofa GN=MYH4 PE=2 SV=1	30936	287893	1373	1373	114	114	110008	1	1	0	565.019	1692.04	3	1692.04	-0.0044	0	44.92	0.00028	R	IQLELNQVK	S				Cmpd 13061, AutoMSn(565.0190), 145.6 min (13229323981865476)	13A/AvB	0.2	16A/AvB	0.208	27A/AvB	0.19	29A/AvB	0.245	10B/AvB	0.255	21B/AvB	0.257	25B/AvB	0.196	37B/AvB	0.293	113	65272.1	114	51259.9	115	53248.4
1	Q9TV62	Myosin-4 OS=Sus scrofa GN=MYH4 PE=2 SV=1	30936	287893	1373	1373	114	114	110434	1	1	0	429.523	1714.06	4	1714.08	-0.014	1	20.97	0.03	R	KLEGDLK	L				Cmpd 9154, AutoMSn(429.5227), 101.1 min (13229323981809001)	13A/AvB	0.175	16A/AvB	0.221	27A/AvB	0.255	29A/AvB	0.188	10B/AvB	0.271	21B/AvB	0.275	25B/AvB	0.179	37B/AvB	0.276	113	31408.6	114	20305.7	115	25617.4
1	Q9TV62	Myosin-4 OS=Sus scrofa GN=MYH4 PE=2 SV=1	30936	287893	1373	1373	114	114	110436	1	1	0	429.523	1714.06	4	1714.08	-0.0136	1	24.81	0.026	R	KLEGDLK	L				Cmpd 9494, AutoMSn(429.5228), 105.5 min (13229323981547604)	13A/AvB	0.152	16A/AvB	0.211	27A/AvB	0.199	29A/AvB	0.218	10B/AvB	0.285	21B/AvB	0.333	25B/AvB	0.132	37B/AvB	0.251	113	16064.8	114	8573.56	115	11900.2
1	Q9TV62	Myosin-4 OS=Sus scrofa GN=MYH4 PE=2 SV=1	30936	287893	1373	1373	114	114	110445	1	1	0	429.523	1714.06	4	1714.08	-0.012	1	23.65	0.016	R	KLEGDLK	L				Cmpd 9791, AutoMSn(429.5232), 110.1 min (13229323981762074)	13A/AvB	-0.021	16A/AvB	0.159	27A/AvB	0.009	29A/AvB	-0.001	10B/AvB	0.237	21B/AvB	0.638	25B/AvB	-0.027	37B/AvB	0.151	113	23656.2	114	-2072.55	115	15827.8
1	Q9TV62	Myosin-4 OS=Sus scrofa GN=MYH4 PE=2 SV=1	30936	287893	1373	1373	114	114	110449	1	1	0	429.523	1714.06	4	1714.08	-0.0115	1	22.42	0.043	R	KLEGDLK	L				Cmpd 9728, AutoMSn(429.5233), 109.5 min (13229323981712859)	13A/AvB	0.151	16A/AvB	0.191	27A/AvB	0.264	29A/AvB	0.194	10B/AvB	0.225	21B/AvB	0.332	25B/AvB	0.166	37B/AvB	0.277	113	11219.1	114	7531.52	115	9504.59
1	Q9TV62	Myosin-4 OS=Sus scrofa GN=MYH4 PE=2 SV=1	30936	287893	1373	1373	114	114	110459	1	1	0	429.524	1714.07	4	1714.08	-0.0107	1	22.99	0.038	R	KLEGDLK	L				Cmpd 9800, AutoMSn(429.5235), 110.3 min (13229323981713003)	13A/AvB	0.116	16A/AvB	0.248	27A/AvB	0.208	29A/AvB	0.194	10B/AvB	0.301	21B/AvB	0.251	25B/AvB	0.198	37B/AvB	0.25	113	12313.3	114	4746.99	115	10154.8
1	Q9TV62	Myosin-4 OS=Sus scrofa GN=MYH4 PE=2 SV=1	30936	287893	1373	1373	114	114	110466	1	1	0	429.524	1714.07	4	1714.08	-0.0103	1	18.6	0.026	R	KLEGDLK	L				Cmpd 9719, AutoMSn(429.5236), 109.3 min (13229323981761930)	13A/AvB	-0.057	16A/AvB	0	27A/AvB	0.323	29A/AvB	-0.004	10B/AvB	0.774	21B/AvB	0.047	25B/AvB	-0.018	37B/AvB	0.197	113	92988.9	114	-6889.72	115	27.0747
1	Q9TV62	Myosin-4 OS=Sus scrofa GN=MYH4 PE=2 SV=1	30936	287893	1373	1373	114	114	110555	1	1	1	574.31	1719.91	3	1719.91	-0.0063	0	47	3.9e-05	R	ANLMQAEIEELR	A				Cmpd 16595, AutoMSn(574.3096), 184.7 min (13229323981823883)	13A/AvB	0.139	16A/AvB	0.304	27A/AvB	0.173	29A/AvB	0.143	10B/AvB	0.394	21B/AvB	0.302	25B/AvB	0.124	37B/AvB	0.18	113	18669	114	6602.59	115	14430.6
1	Q9TV62	Myosin-4 OS=Sus scrofa GN=MYH4 PE=2 SV=1	30936	287893	1373	1373	114	114	110558	1	1	1	860.961	1719.91	2	1719.91	-0.005	0	21.18	0.01	R	ANLMQAEIEELR	A				Cmpd 16689, AutoMSn(860.9614), 187.0 min (13229323981561994)	13A/AvB	0.163	16A/AvB	0.244	27A/AvB	0.243	29A/AvB	0.21	10B/AvB	0.288	21B/AvB	0.262	25B/AvB	0.157	37B/AvB	0.294	113	13192.3	114	7482.41	115	11191.9
1	Q9TV62	Myosin-4 OS=Sus scrofa GN=MYH4 PE=2 SV=1	30936	287893	1373	1373	114	114	110559	1	1	1	860.961	1719.91	2	1719.91	-0.0049	0	31.76	0.0011	R	ANLMQAEIEELR	A				Cmpd 16638, AutoMSn(860.9614), 185.2 min (13229323981823969)	13A/AvB	0.158	16A/AvB	0.234	27A/AvB	0.211	29A/AvB	0.207	10B/AvB	0.227	21B/AvB	0.311	25B/AvB	0.202	37B/AvB	0.26	113	11483.5	114	8004.66	115	11832.7
1	Q9TV62	Myosin-4 OS=Sus scrofa GN=MYH4 PE=2 SV=1	30936	287893	1373	1373	114	114	110561	1	1	1	860.962	1719.91	2	1719.91	-0.0045	0	22.74	0.0074	R	ANLMQAEIEELR	A				Cmpd 16434, AutoMSn(860.9616), 185.7 min (13229323981775360)	13A/AvB	0.364	16A/AvB	0.021	27A/AvB	-0.019	29A/AvB	0.326	10B/AvB	0.166	21B/AvB	0.642	25B/AvB	-0.026	37B/AvB	0.219	113	2945.21	114	6466.72	115	373.487
1	Q9TV62	Myosin-4 OS=Sus scrofa GN=MYH4 PE=2 SV=1	30936	287893	1373	1373	114	114	110562	1	1	1	574.31	1719.91	3	1719.91	-0.0044	0	37.19	0.00033	R	ANLMQAEIEELR	A				Cmpd 16374, AutoMSn(574.3102), 183.3 min (13229323981872102)	13A/AvB	0.227	16A/AvB	0.229	27A/AvB	0.204	29A/AvB	0.166	10B/AvB	0.401	21B/AvB	0.282	25B/AvB	0.16	37B/AvB	0.157	113	14646.4	114	8283.5	115	8361.89
1	Q9TV62	Myosin-4 OS=Sus scrofa GN=MYH4 PE=2 SV=1	30936	287893	1373	1373	114	114	110563	1	1	1	860.962	1719.91	2	1719.91	-0.0043	0	26.03	0.0036	R	ANLMQAEIEELR	A				Cmpd 16452, AutoMSn(860.9617), 184.2 min (13229323981872258)	13A/AvB	0.25	16A/AvB	0.205	27A/AvB	0.148	29A/AvB	0.196	10B/AvB	0.207	21B/AvB	0.321	25B/AvB	0.186	37B/AvB	0.286	113	7303.77	114	8828.67	115	7239.8
1	Q9TV62	Myosin-4 OS=Sus scrofa GN=MYH4 PE=2 SV=1	30936	287893	1373	1373	114	114	110564	1	1	1	860.962	1719.91	2	1719.91	-0.0043	0	32.44	0.00091	R	ANLMQAEIEELR	A				Cmpd 16617, AutoMSn(860.9617), 186.2 min (13229323981561850)	13A/AvB	0.211	16A/AvB	0.145	27A/AvB	0.216	29A/AvB	0.254	10B/AvB	0.24	21B/AvB	0.249	25B/AvB	0.226	37B/AvB	0.284	113	10984.7	114	9624.06	115	6637.1
1	Q9TV62	Myosin-4 OS=Sus scrofa GN=MYH4 PE=2 SV=1	30936	287893	1373	1373	114	114	110565	1	1	1	860.962	1719.91	2	1719.91	-0.0041	0	24.2	0.0054	R	ANLMQAEIEELR	A				Cmpd 16388, AutoMSn(860.9618), 185.5 min (13229323981726179)	13A/AvB	0.395	16A/AvB	0.416	27A/AvB	0.231	29A/AvB	0.315	10B/AvB	0.177	21B/AvB	0.353	25B/AvB	0.206	37B/AvB	0.263	113	1634.35	114	3635.77	115	3836.57
1	Q9TV62	Myosin-4 OS=Sus scrofa GN=MYH4 PE=2 SV=1	30936	287893	1373	1373	114	114	110567	1	1	1	860.962	1719.91	2	1719.91	-0.0035	0	46.11	4.7e-05	R	ANLMQAEIEELR	A				Cmpd 16566, AutoMSn(860.9621), 184.4 min (13229323981823825)	13A/AvB	0.223	16A/AvB	0.187	27A/AvB	0.236	29A/AvB	0.233	10B/AvB	0.205	21B/AvB	0.273	25B/AvB	0.234	37B/AvB	0.287	113	15071	114	16337.1	115	13728.9
1	Q9TV62	Myosin-4 OS=Sus scrofa GN=MYH4 PE=2 SV=1	30936	287893	1373	1373	114	114	110569	1	1	1	860.962	1719.91	2	1719.91	-0.0029	0	57.58	1.4e-05	R	ANLMQAEIEELR	A				Cmpd 16380, AutoMSn(860.9624), 183.4 min (13229323981872114)	13A/AvB	0.261	16A/AvB	0.302	27A/AvB	0.221	29A/AvB	0.292	10B/AvB	0.16	21B/AvB	0.361	25B/AvB	0.211	37B/AvB	0.268	113	7896.36	114	12835.2	115	14850.9
1	Q9TV62	Myosin-4 OS=Sus scrofa GN=MYH4 PE=2 SV=1	30936	287893	1373	1373	114	114	110849	1	1	1	579.641	1735.9	3	1735.91	-0.0055	0	55.95	5.7e-06	R	ANLMQAEIEELR	A	Oxidation (M)	0.000200000000.0		Cmpd 11778, AutoMSn(579.6415), 132.7 min (13229323981766048)	13A/AvB	2.675	16A/AvB	0.276	27A/AvB	0.498	29A/AvB	0.796	10B/AvB	0.348	21B/AvB	0.41	25B/AvB	-0.044	37B/AvB	0.286	113	2413.55	114	18567.4	115	1918.6
1	Q9TV62	Myosin-4 OS=Sus scrofa GN=MYH4 PE=2 SV=1	30936	287893	1373	1373	114	114	110850	1	1	1	579.641	1735.9	3	1735.91	-0.0053	0	47.16	3.8e-05	R	ANLMQAEIEELR	A	Oxidation (M)	0.000200000000.0		Cmpd 11675, AutoMSn(579.6416), 129.2 min (13229323981814043)	13A/AvB	0.223	16A/AvB	0.344	27A/AvB	0.295	29A/AvB	0.219	10B/AvB	0.282	21B/AvB	0.39	25B/AvB	0.152	37B/AvB	0.176	113	15959.3	114	12618.4	115	19430.1
1	Q9TV62	Myosin-4 OS=Sus scrofa GN=MYH4 PE=2 SV=1	30936	287893	1373	1373	114	114	110851	1	1	1	579.642	1735.9	3	1735.91	-0.0049	0	60.18	2.3e-06	R	ANLMQAEIEELR	A	Oxidation (M)	0.000200000000.0		Cmpd 11781, AutoMSn(579.6417), 130.4 min (13229323981814255)	13A/AvB	0.214	16A/AvB	0.292	27A/AvB	0.221	29A/AvB	0.196	10B/AvB	0.278	21B/AvB	0.367	25B/AvB	0.131	37B/AvB	0.223	113	27343.5	114	21070.2	115	28763.6
1	Q9TV62	Myosin-4 OS=Sus scrofa GN=MYH4 PE=2 SV=1	30936	287893	1373	1373	114	114	110852	1	1	1	868.959	1735.9	2	1735.91	-0.0048	0	31.94	0.001	R	ANLMQAEIEELR	A	Oxidation (M)	0.000200000000.0		Cmpd 11656, AutoMSn(868.9589), 131.5 min (13229323981716715)	13A/AvB	0.259	16A/AvB	0.256	27A/AvB	0.203	29A/AvB	0.219	10B/AvB	0.185	21B/AvB	0.353	25B/AvB	0.159	37B/AvB	0.303	113	2777.48	114	3888.49	115	3847.41
1	Q9TV62	Myosin-4 OS=Sus scrofa GN=MYH4 PE=2 SV=1	30936	287893	1373	1373	114	114	110853	1	1	1	579.642	1735.9	3	1735.91	-0.0047	0	40.37	0.00016	R	ANLMQAEIEELR	A	Oxidation (M)	0.000200000000.0		Cmpd 11813, AutoMSn(579.6418), 131.6 min (13229323981552242)	13A/AvB	0.228	16A/AvB	0.384	27A/AvB	0.236	29A/AvB	0.168	10B/AvB	0.304	21B/AvB	0.332	25B/AvB	0.161	37B/AvB	0.203	113	11306.5	114	8473.12	115	14307.6
1	Q9TV62	Myosin-4 OS=Sus scrofa GN=MYH4 PE=2 SV=1	30936	287893	1373	1373	114	114	110854	1	1	1	868.959	1735.9	2	1735.91	-0.0047	0	19.9	0.014	R	ANLMQAEIEELR	A	Oxidation (M)	0.000200000000.0		Cmpd 11682, AutoMSn(868.9590), 131.6 min (13229323981765856)	13A/AvB	-0.026	16A/AvB	0.01	27A/AvB	-0.008	29A/AvB	0.137	10B/AvB	0.342	21B/AvB	0.499	25B/AvB	-0.021	37B/AvB	0.18	113	6758.64	114	-504.717	115	197.712
1	Q9TV62	Myosin-4 OS=Sus scrofa GN=MYH4 PE=2 SV=1	30936	287893	1373	1373	114	114	110855	1	1	1	868.959	1735.9	2	1735.91	-0.0047	0	42.25	0.00011	R	ANLMQAEIEELR	A	Oxidation (M)	0.000200000000.0		Cmpd 11777, AutoMSn(868.9590), 132.7 min (13229323981766046)	13A/AvB	1.935	16A/AvB	0.105	27A/AvB	0.457	29A/AvB	0.611	10B/AvB	0.426	21B/AvB	0.078	25B/AvB	-0.027	37B/AvB	0.524	113	10748.9	114	48881.2	115	2653.41
1	Q9TV62	Myosin-4 OS=Sus scrofa GN=MYH4 PE=2 SV=1	30936	287893	1373	1373	114	114	110856	1	1	1	868.959	1735.9	2	1735.91	-0.0047	0	33.57	0.00071	R	ANLMQAEIEELR	A	Oxidation (M)	0.000200000000.0		Cmpd 11669, AutoMSn(868.9590), 129.2 min (13229323981814031)	13A/AvB	0.167	16A/AvB	0.229	27A/AvB	0.241	29A/AvB	0.254	10B/AvB	0.246	21B/AvB	0.386	25B/AvB	0.159	37B/AvB	0.208	113	10822.5	114	7353.95	115	10061.4
1	Q9TV62	Myosin-4 OS=Sus scrofa GN=MYH4 PE=2 SV=1	30936	287893	1373	1373	114	114	110857	1	1	1	579.642	1735.9	3	1735.91	-0.0046	0	72.85	1.5e-07	R	ANLMQAEIEELR	A	Oxidation (M)	0.000200000000.0		Cmpd 11537, AutoMSn(579.6418), 128.5 min (13229323981862428)	13A/AvB	0.233	16A/AvB	0.277	27A/AvB	0.239	29A/AvB	0.286	10B/AvB	0.257	21B/AvB	0.381	25B/AvB	0.152	37B/AvB	0.21	113	18832.5	114	17043.8	115	20301.7
1	Q9TV62	Myosin-4 OS=Sus scrofa GN=MYH4 PE=2 SV=1	30936	287893	1373	1373	114	114	110859	1	1	1	579.642	1735.9	3	1735.91	-0.0042	0	69.86	2.8e-07	R	ANLMQAEIEELR	A	Oxidation (M)	0.000200000000.0		Cmpd 11709, AutoMSn(579.6419), 129.6 min (13229323981814111)	13A/AvB	0.261	16A/AvB	0.356	27A/AvB	0.265	29A/AvB	0.215	10B/AvB	0.228	21B/AvB	0.378	25B/AvB	0.146	37B/AvB	0.247	113	19107	114	21842.2	115	29804.2
1	Q9TV62	Myosin-4 OS=Sus scrofa GN=MYH4 PE=2 SV=1	30936	287893	1373	1373	114	114	110861	1	1	1	868.959	1735.9	2	1735.91	-0.0042	0	22.12	0.0084	R	ANLMQAEIEELR	A	Oxidation (M)	0.000200000000.0		Cmpd 11777, AutoMSn(868.9592), 131.2 min (13229323981552170)	13A/AvB	0.23	16A/AvB	0.248	27A/AvB	0.199	29A/AvB	0.272	10B/AvB	0.245	21B/AvB	0.346	25B/AvB	0.197	37B/AvB	0.211	113	5826.01	114	5466.59	115	5886.01
1	Q9TV62	Myosin-4 OS=Sus scrofa GN=MYH4 PE=2 SV=1	30936	287893	1373	1373	114	114	110862	1	1	1	868.959	1735.9	2	1735.91	-0.0041	0	48.78	2.7e-05	R	ANLMQAEIEELR	A	Oxidation (M)	0.000200000000.0		Cmpd 11705, AutoMSn(868.9593), 131.9 min (13229323981765902)	13A/AvB	-0.044	16A/AvB	0.016	27A/AvB	0.118	29A/AvB	0.162	10B/AvB	0.755	21B/AvB	0.095	25B/AvB	-0.01	37B/AvB	0.161	113	45865.4	114	-2677.7	115	964.605
1	Q9TV62	Myosin-4 OS=Sus scrofa GN=MYH4 PE=2 SV=1	30936	287893	1373	1373	114	114	110863	1	1	1	579.642	1735.9	3	1735.91	-0.004	0	52.66	1.2e-05	R	ANLMQAEIEELR	A	Oxidation (M)	0.000200000000.0		Cmpd 11437, AutoMSn(579.6420), 127.3 min (13229323981862228)	13A/AvB	0.226	16A/AvB	0.266	27A/AvB	0.293	29A/AvB	0.191	10B/AvB	0.354	21B/AvB	0.317	25B/AvB	0.151	37B/AvB	0.179	113	17791.6	114	11378.9	115	13393.6
1	Q9TV62	Myosin-4 OS=Sus scrofa GN=MYH4 PE=2 SV=1	30936	287893	1373	1373	114	114	110864	1	1	1	579.642	1735.9	3	1735.91	-0.0038	0	87.09	1.1e-08	R	ANLMQAEIEELR	A	Oxidation (M)	0.000200000000.0		Cmpd 11465, AutoMSn(579.6420), 127.7 min (13229323981862284)	13A/AvB	0.196	16A/AvB	0.295	27A/AvB	0.26	29A/AvB	0.158	10B/AvB	0.244	21B/AvB	0.389	25B/AvB	0.152	37B/AvB	0.215	113	24063.5	114	19390.8	115	29177.8
1	Q9TV62	Myosin-4 OS=Sus scrofa GN=MYH4 PE=2 SV=1	30936	287893	1373	1373	114	114	110865	1	1	1	868.959	1735.9	2	1735.91	-0.0038	0	60.82	2e-06	R	ANLMQAEIEELR	A	Oxidation (M)	0.000200000000.0		Cmpd 11726, AutoMSn(868.9594), 132.3 min (13229323981716855)	13A/AvB	0.254	16A/AvB	0.195	27A/AvB	0.249	29A/AvB	0.187	10B/AvB	0.273	21B/AvB	0.326	25B/AvB	0.185	37B/AvB	0.216	113	10654.3	114	9927.83	115	7608.38
1	Q9TV62	Myosin-4 OS=Sus scrofa GN=MYH4 PE=2 SV=1	30936	287893	1373	1373	114	114	110866	1	1	1	579.642	1735.9	3	1735.91	-0.0036	0	41.94	0.00012	R	ANLMQAEIEELR	A	Oxidation (M)	0.000200000000.0		Cmpd 11709, AutoMSn(579.6421), 131.9 min (13229323981765910)	13A/AvB	2.066	16A/AvB	0.115	27A/AvB	0.691	29A/AvB	0.474	10B/AvB	0.411	21B/AvB	0.291	25B/AvB	-0.048	37B/AvB	0.345	113	3094.54	114	15542.5	115	863.346
1	Q9TV62	Myosin-4 OS=Sus scrofa GN=MYH4 PE=2 SV=1	30936	287893	1373	1373	114	114	110867	1	1	1	868.96	1735.9	2	1735.91	-0.0036	0	20.02	0.013	R	ANLMQAEIEELR	A	Oxidation (M)	0.000200000000.0		Cmpd 11942, AutoMSn(868.9596), 133.1 min (13229323981552500)	13A/AvB	0.164	16A/AvB	0.272	27A/AvB	0.247	29A/AvB	0.201	10B/AvB	0.285	21B/AvB	0.364	25B/AvB	0.158	37B/AvB	0.192	113	9120.92	114	5255.64	115	8713.93
1	Q9TV62	Myosin-4 OS=Sus scrofa GN=MYH4 PE=2 SV=1	30936	287893	1373	1373	114	114	110868	1	1	1	579.642	1735.9	3	1735.91	-0.0033	0	41.64	0.00012	R	ANLMQAEIEELR	A	Oxidation (M)	0.000200000000.0		Cmpd 11885, AutoMSn(579.6422), 132.4 min (13229323981552386)	13A/AvB	0.209	16A/AvB	0.293	27A/AvB	0.224	29A/AvB	0.269	10B/AvB	0.39	21B/AvB	0.259	25B/AvB	0.131	37B/AvB	0.22	113	12391	114	6651.18	115	9290.72
1	Q9TV62	Myosin-4 OS=Sus scrofa GN=MYH4 PE=2 SV=1	30936	287893	1373	1373	114	114	110869	1	1	1	868.96	1735.91	2	1735.91	-0.003	0	17.88	0.021	R	ANLMQAEIEELR	A	Oxidation (M)	0.000200000000.0		Cmpd 11798, AutoMSn(868.9599), 133.1 min (13229323981716999)	13A/AvB	0.153	16A/AvB	0.284	27A/AvB	0.19	29A/AvB	0.316	10B/AvB	0.202	21B/AvB	0.304	25B/AvB	0.204	37B/AvB	0.29	113	2940.71	114	2229.81	115	4131.06
1	Q9TV62	Myosin-4 OS=Sus scrofa GN=MYH4 PE=2 SV=1	30936	287893	1373	1373	114	114	110870	1	1	1	868.96	1735.91	2	1735.91	-0.003	0	43.74	7.9e-05	R	ANLMQAEIEELR	A	Oxidation (M)	0.000200000000.0		Cmpd 11798, AutoMSn(868.9598), 131.5 min (13229323981552212)	13A/AvB	0.175	16A/AvB	0.231	27A/AvB	0.203	29A/AvB	0.146	10B/AvB	0.196	21B/AvB	0.344	25B/AvB	0.155	37B/AvB	0.305	113	15558.7	114	13895.9	115	18343.4
1	Q9TV62	Myosin-4 OS=Sus scrofa GN=MYH4 PE=2 SV=1	30936	287893	1373	1373	114	114	110871	1	1	1	868.96	1735.91	2	1735.91	-0.003	0	63.71	1.1e-06	R	ANLMQAEIEELR	A	Oxidation (M)	0.000200000000.0		Cmpd 11769, AutoMSn(868.9598), 130.3 min (13229323981814231)	13A/AvB	0.222	16A/AvB	0.239	27A/AvB	0.197	29A/AvB	0.23	10B/AvB	0.194	21B/AvB	0.312	25B/AvB	0.184	37B/AvB	0.31	113	32975.5	114	37831.7	115	40665.1
1	Q9TV62	Myosin-4 OS=Sus scrofa GN=MYH4 PE=2 SV=1	30936	287893	1373	1373	114	114	110872	1	1	1	868.96	1735.91	2	1735.91	-0.0028	0	64.48	9e-07	R	ANLMQAEIEELR	A	Oxidation (M)	0.000200000000.0		Cmpd 11453, AutoMSn(868.9599), 127.5 min (13229323981862260)	13A/AvB	0.231	16A/AvB	0.251	27A/AvB	0.202	29A/AvB	0.235	10B/AvB	0.169	21B/AvB	0.353	25B/AvB	0.194	37B/AvB	0.284	113	21464.2	114	29379.1	115	31838.2
1	Q9TV62	Myosin-4 OS=Sus scrofa GN=MYH4 PE=2 SV=1	30936	287893	1373	1373	114	114	110873	1	1	1	579.643	1735.91	3	1735.91	-0.0025	0	22.73	0.0074	R	ANLMQAEIEELR	A	Oxidation (M)	0.000200000000.0		Cmpd 11690, AutoMSn(579.6425), 131.9 min (13229323981716783)	13A/AvB	0.247	16A/AvB	0.401	27A/AvB	0.223	29A/AvB	0.146	10B/AvB	0.227	21B/AvB	0.488	25B/AvB	0.105	37B/AvB	0.181	113	2262.11	114	2465.6	115	3996.34
1	Q9TV62	Myosin-4 OS=Sus scrofa GN=MYH4 PE=2 SV=1	30936	287893	1373	1373	114	114	110874	1	1	1	868.96	1735.91	2	1735.91	-0.0025	0	55.37	6.4e-06	R	ANLMQAEIEELR	A	Oxidation (M)	0.000200000000.0		Cmpd 11697, AutoMSn(868.9601), 129.5 min (13229323981814087)	13A/AvB	0.217	16A/AvB	0.202	27A/AvB	0.203	29A/AvB	0.243	10B/AvB	0.183	21B/AvB	0.346	25B/AvB	0.185	37B/AvB	0.286	113	27005.1	114	31957.7	115	29826.4
1	Q9TV62	Myosin-4 OS=Sus scrofa GN=MYH4 PE=2 SV=1	30936	287893	1373	1373	114	114	110875	1	1	1	868.96	1735.91	2	1735.91	-0.0023	0	59.42	2.7e-06	R	ANLMQAEIEELR	A	Oxidation (M)	0.000200000000.0		Cmpd 11870, AutoMSn(868.9601), 132.3 min (13229323981552356)	13A/AvB	0.233	16A/AvB	0.212	27A/AvB	0.208	29A/AvB	0.192	10B/AvB	0.19	21B/AvB	0.345	25B/AvB	0.129	37B/AvB	0.336	113	20398.3	114	25113.8	115	22805.4
1	Q9TV62	Myosin-4 OS=Sus scrofa GN=MYH4 PE=2 SV=1	30936	287893	1373	1373	114	114	110876	1	1	1	868.96	1735.91	2	1735.91	-0.0022	0	23.97	0.0056	R	ANLMQAEIEELR	A	Oxidation (M)	0.000200000000.0		Cmpd 11431, AutoMSn(868.9602), 127.3 min (13229323981862216)	13A/AvB	0.254	16A/AvB	0.354	27A/AvB	0.327	29A/AvB	0.3	10B/AvB	0.219	21B/AvB	0.351	25B/AvB	0.152	37B/AvB	0.279	113	7479.59	114	8691.65	115	12096.7
1	Q9TV62	Myosin-4 OS=Sus scrofa GN=MYH4 PE=2 SV=1	30936	287893	1373	1373	114	114	110877	1	1	1	868.96	1735.91	2	1735.91	-0.0021	0	31.5	0.0011	R	ANLMQAEIEELR	A	Oxidation (M)	0.000200000000.0		Cmpd 11525, AutoMSn(868.9602), 128.3 min (13229323981862404)	13A/AvB	0.272	16A/AvB	0.209	27A/AvB	0.203	29A/AvB	0.222	10B/AvB	0.226	21B/AvB	0.335	25B/AvB	0.149	37B/AvB	0.29	113	29903.6	114	36009.7	115	27694.5
1	Q9TV62	Myosin-4 OS=Sus scrofa GN=MYH4 PE=2 SV=1	30936	287893	1373	1373	114	114	110912	1	1	0	580.008	1737	3	1737.01	-0.0119	0	13.96	0.049	R	LDEAEQLALK	G				Cmpd 14347, AutoMSn(580.0077), 162.1 min (13229323981722097)	13A/AvB	0.315	16A/AvB	0.261	27A/AvB	0.32	29A/AvB	0.203	10B/AvB	0.436	21B/AvB	0.418	25B/AvB	0.146	37B/AvB	0	113	2202.07	114	1588.72	115	1317.66
1	Q9TV62	Myosin-4 OS=Sus scrofa GN=MYH4 PE=2 SV=1	30936	287893	1373	1373	114	114	110915	1	1	0	580.008	1737	3	1737.01	-0.0103	0	30.46	0.0014	R	LDEAEQLALK	G				Cmpd 14438, AutoMSn(580.0083), 161.3 min (13229323981557492)	13A/AvB	0.184	16A/AvB	0.247	27A/AvB	0.169	29A/AvB	0.192	10B/AvB	0.324	21B/AvB	0.285	25B/AvB	0.194	37B/AvB	0.197	113	6873.43	114	3898.81	115	5240.61
1	Q9TV62	Myosin-4 OS=Sus scrofa GN=MYH4 PE=2 SV=1	30936	287893	1373	1373	114	114	110916	1	1	0	580.008	1737	3	1737.01	-0.0103	0	14.91	0.04	R	LDEAEQLALK	G				Cmpd 12067, AutoMSn(580.0083), 133.6 min (13229323981814827)	13A/AvB	0.278	16A/AvB	0.387	27A/AvB	0.283	29A/AvB	0.288	10B/AvB	0.255	21B/AvB	0.37	25B/AvB	0.185	37B/AvB	0.19	113	14037.1	114	15292.7	115	21309.9
1	Q9TV62	Myosin-4 OS=Sus scrofa GN=MYH4 PE=2 SV=1	30936	287893	1373	1373	114	114	110917	1	1	0	580.008	1737	3	1737.01	-0.0099	0	18.36	0.019	R	LDEAEQLALK	G				Cmpd 12147, AutoMSn(580.0084), 135.4 min (13229323981552910)	13A/AvB	0.222	16A/AvB	0.32	27A/AvB	0.245	29A/AvB	0.193	10B/AvB	0.318	21B/AvB	0.359	25B/AvB	0.161	37B/AvB	0.162	113	9486.32	114	6601.43	115	9524.8
1	Q9TV62	Myosin-4 OS=Sus scrofa GN=MYH4 PE=2 SV=1	30936	287893	1373	1373	114	114	110918	1	1	0	869.509	1737	2	1737.01	-0.0095	0	33.54	0.00072	R	LDEAEQLALK	G				Cmpd 14373, AutoMSn(869.5092), 160.5 min (13229323981868100)	13A/AvB	0.301	16A/AvB	0.201	27A/AvB	0.171	29A/AvB	0.316	10B/AvB	0.236	21B/AvB	0.282	25B/AvB	0.278	37B/AvB	0.205	113	4919.62	114	6292.8	115	4187.8
1	Q9TV62	Myosin-4 OS=Sus scrofa GN=MYH4 PE=2 SV=1	30936	287893	1373	1373	114	114	110921	1	1	0	580.009	1737	3	1737.01	-0.0088	0	38.27	0.00033	R	LDEAEQLALK	G				Cmpd 14096, AutoMSn(580.0088), 157.4 min (13229323981867546)	13A/AvB	0.137	16A/AvB	0.294	27A/AvB	0.286	29A/AvB	0.234	10B/AvB	0.361	21B/AvB	0.271	25B/AvB	0.143	37B/AvB	0.225	113	11852.8	114	4504.96	115	9666.67
1	Q9TV62	Myosin-4 OS=Sus scrofa GN=MYH4 PE=2 SV=1	30936	287893	1373	1373	114	114	110922	1	1	0	580.009	1737	3	1737.01	-0.0086	0	36.58	0.00041	R	LDEAEQLALK	G				Cmpd 14332, AutoMSn(580.0089), 160.0 min (13229323981868018)	13A/AvB	0.232	16A/AvB	0.201	27A/AvB	0.198	29A/AvB	0.244	10B/AvB	0.26	21B/AvB	0.316	25B/AvB	0.151	37B/AvB	0.273	113	8325.71	114	7437.98	115	6437.96
1	Q9TV62	Myosin-4 OS=Sus scrofa GN=MYH4 PE=2 SV=1	30936	287893	1373	1373	114	114	110924	1	1	0	580.009	1737	3	1737.01	-0.0084	0	22.85	0.008	R	LDEAEQLALK	G				Cmpd 14440, AutoMSn(580.0089), 163.0 min (13229323981771372)	13A/AvB	0.543	16A/AvB	1.908	27A/AvB	0.978	29A/AvB	-0.021	10B/AvB	0.636	21B/AvB	-0.1	25B/AvB	-0.047	37B/AvB	0.512	113	3900.82	114	3330.3	115	11705
1	Q9TV62	Myosin-4 OS=Sus scrofa GN=MYH4 PE=2 SV=1	30936	287893	1373	1373	114	114	110925	1	1	0	580.009	1737	3	1737.01	-0.0084	0	40.98	0.00018	R	LDEAEQLALK	G				Cmpd 14725, AutoMSn(580.0089), 163.5 min (13229323981820143)	13A/AvB	0.259	16A/AvB	0.303	27A/AvB	0.181	29A/AvB	0.286	10B/AvB	0.314	21B/AvB	0.308	25B/AvB	0.141	37B/AvB	0.237	113	19791.2	114	16373	115	19123.9
1	Q9TV62	Myosin-4 OS=Sus scrofa GN=MYH4 PE=2 SV=1	30936	287893	1373	1373	114	114	110926	1	1	0	580.009	1737	3	1737.01	-0.0084	0	21.77	0.0091	R	LDEAEQLALK	G				Cmpd 14357, AutoMSn(580.0089), 159.4 min (13229323981819407)	13A/AvB	0.219	16A/AvB	0.32	27A/AvB	0.303	29A/AvB	0.237	10B/AvB	0.349	21B/AvB	0.271	25B/AvB	0.16	37B/AvB	0.22	113	21317.9	114	13412.5	115	19550.6
1	Q9TV62	Myosin-4 OS=Sus scrofa GN=MYH4 PE=2 SV=1	30936	287893	1373	1373	114	114	110927	1	1	0	580.009	1737.01	3	1737.01	-0.0082	0	40.87	0.00022	R	LDEAEQLALK	G				Cmpd 14799, AutoMSn(580.0090), 165.5 min (13229323981558214)	13A/AvB	0.232	16A/AvB	0.162	27A/AvB	0.273	29A/AvB	0.183	10B/AvB	0.298	21B/AvB	0.324	25B/AvB	0.152	37B/AvB	0.226	113	7685.56	114	6001.79	115	4191.34
1	Q9TV62	Myosin-4 OS=Sus scrofa GN=MYH4 PE=2 SV=1	30936	287893	1373	1373	114	114	110928	1	1	0	580.009	1737.01	3	1737.01	-0.0082	0	46.31	8.3e-05	R	LDEAEQLALK	G				Cmpd 14358, AutoMSn(580.0090), 160.4 min (13229323981868070)	13A/AvB	0.224	16A/AvB	0.247	27A/AvB	0.239	29A/AvB	0.269	10B/AvB	0.313	21B/AvB	0.235	25B/AvB	0.187	37B/AvB	0.265	113	18440.8	114	13189.7	115	14520.3
1	Q9TV62	Myosin-4 OS=Sus scrofa GN=MYH4 PE=2 SV=1	30936	287893	1373	1373	114	114	110930	1	1	0	869.51	1737.01	2	1737.01	-0.0076	0	21.11	0.01	R	LDEAEQLALK	G				Cmpd 14457, AutoMSn(869.5101), 163.4 min (13229323981722317)	13A/AvB	0.109	16A/AvB	0.105	27A/AvB	0.128	29A/AvB	0.218	10B/AvB	0.461	21B/AvB	0.226	25B/AvB	0.144	37B/AvB	0.169	113	8129.51	114	1927.97	115	1854.5
1	Q9TV62	Myosin-4 OS=Sus scrofa GN=MYH4 PE=2 SV=1	30936	287893	1373	1373	114	114	110931	1	1	0	580.009	1737.01	3	1737.01	-0.0075	0	53.43	1.6e-05	R	LDEAEQLALK	G				Cmpd 14616, AutoMSn(580.0092), 165.0 min (13229323981771724)	13A/AvB	-0.091	16A/AvB	1.904	27A/AvB	0	29A/AvB	-0.001	10B/AvB	0.709	21B/AvB	-0.1	25B/AvB	0.002	37B/AvB	0.389	113	8724.59	114	-1120.14	115	23436.3
1	Q9TV62	Myosin-4 OS=Sus scrofa GN=MYH4 PE=2 SV=1	30936	287893	1373	1373	114	114	110932	1	1	0	869.51	1737.01	2	1737.01	-0.0074	0	36.65	0.00037	R	LDEAEQLALK	G				Cmpd 14607, AutoMSn(869.5102), 162.2 min (13229323981819907)	13A/AvB	0.273	16A/AvB	0.25	27A/AvB	0.255	29A/AvB	0.284	10B/AvB	0.376	21B/AvB	0.359	25B/AvB	0.131	37B/AvB	0.134	113	12632.5	114	9165.01	115	8412.7
1	Q9TV62	Myosin-4 OS=Sus scrofa GN=MYH4 PE=2 SV=1	30936	287893	1373	1373	114	114	110933	1	1	0	580.009	1737.01	3	1737.01	-0.0073	0	56.31	2.4e-05	R	LDEAEQLALK	G				Cmpd 14543, AutoMSn(580.0093), 164.2 min (13229323981771578)	13A/AvB	-0.029	16A/AvB	0.001	27A/AvB	-0.006	29A/AvB	0.192	10B/AvB	0.391	21B/AvB	0.464	25B/AvB	-0.019	37B/AvB	0.164	113	43739.1	114	-3242.47	115	99.6798
1	Q9TV62	Myosin-4 OS=Sus scrofa GN=MYH4 PE=2 SV=1	30936	287893	1373	1373	114	114	110934	1	1	0	580.009	1737.01	3	1737.01	-0.0073	0	20.75	0.011	R	LDEAEQLALK	G				Cmpd 11831, AutoMSn(580.0093), 131.8 min (13229323981863016)	13A/AvB	0.239	16A/AvB	0.329	27A/AvB	0.324	29A/AvB	0.238	10B/AvB	0.316	21B/AvB	0.341	25B/AvB	0.138	37B/AvB	0.205	113	16520.6	114	12481.7	115	17220
1	Q9TV62	Myosin-4 OS=Sus scrofa GN=MYH4 PE=2 SV=1	30936	287893	1373	1373	114	114	110935	1	1	0	580.009	1737.01	3	1737.01	-0.007	0	46.2	8.3e-05	R	LDEAEQLALK	G				Cmpd 14471, AutoMSn(580.0094), 163.4 min (13229323981771434)	13A/AvB	-0.059	16A/AvB	0.024	27A/AvB	0.341	29A/AvB	-0.007	10B/AvB	0.796	21B/AvB	0.043	25B/AvB	-0.019	37B/AvB	0.18	113	31616.5	114	-2361.77	115	961.318
1	Q9TV62	Myosin-4 OS=Sus scrofa GN=MYH4 PE=2 SV=1	30936	287893	1373	1373	114	114	110938	1	1	0	580.01	1737.01	3	1737.01	-0.0068	0	28.56	0.0021	R	LDEAEQLALK	G				Cmpd 14549, AutoMSn(580.0094), 161.5 min (13229323981819791)	13A/AvB	0.261	16A/AvB	0.471	27A/AvB	0.291	29A/AvB	0.263	10B/AvB	0.26	21B/AvB	0.309	25B/AvB	0.21	37B/AvB	0.221	113	17652	114	17723.7	115	31952
1	Q9TV62	Myosin-4 OS=Sus scrofa GN=MYH4 PE=2 SV=1	30936	287893	1373	1373	114	114	110939	1	1	0	580.01	1737.01	3	1737.01	-0.0068	0	51.39	7.6e-05	R	LDEAEQLALK	G				Cmpd 14579, AutoMSn(580.0094), 161.9 min (13229323981819851)	13A/AvB	0.173	16A/AvB	0.22	27A/AvB	0.242	29A/AvB	0.25	10B/AvB	0.287	21B/AvB	0.271	25B/AvB	0.184	37B/AvB	0.258	113	37629.7	114	22693.3	115	28859.7
1	Q9TV62	Myosin-4 OS=Sus scrofa GN=MYH4 PE=2 SV=1	30936	287893	1373	1373	114	114	110940	1	1	0	580.01	1737.01	3	1737.01	-0.0066	0	55.09	3.2e-05	R	LDEAEQLALK	G				Cmpd 14727, AutoMSn(580.0095), 164.7 min (13229323981558070)	13A/AvB	0.255	16A/AvB	0.247	27A/AvB	0.254	29A/AvB	0.296	10B/AvB	0.273	21B/AvB	0.215	25B/AvB	0.186	37B/AvB	0.326	113	24928.7	114	23267.7	115	22525.1
1	Q9TV62	Myosin-4 OS=Sus scrofa GN=MYH4 PE=2 SV=1	30936	287893	1373	1373	114	114	110941	1	1	0	580.01	1737.01	3	1737.01	-0.0066	0	39.49	0.0012	R	LDEAEQLALK	G				Cmpd 14472, AutoMSn(580.0095), 161.7 min (13229323981868298)	13A/AvB	0.226	16A/AvB	0.267	27A/AvB	0.251	29A/AvB	0.267	10B/AvB	0.305	21B/AvB	0.231	25B/AvB	0.174	37B/AvB	0.29	113	27616.4	114	20496.4	115	24232
1	Q9TV62	Myosin-4 OS=Sus scrofa GN=MYH4 PE=2 SV=1	30936	287893	1373	1373	114	114	110942	1	1	0	869.511	1737.01	2	1737.01	-0.0063	0	50.33	1.9e-05	R	LDEAEQLALK	G				Cmpd 14721, AutoMSn(869.5108), 164.6 min (13229323981558058)	13A/AvB	0.143	16A/AvB	0.178	27A/AvB	0.154	29A/AvB	0.177	10B/AvB	0.378	21B/AvB	0.251	25B/AvB	0.15	37B/AvB	0.221	113	20402.3	114	7703.03	115	9599.28
1	Q9TV62	Myosin-4 OS=Sus scrofa GN=MYH4 PE=2 SV=1	30936	287893	1373	1373	114	114	110943	1	1	0	580.01	1737.01	3	1737.01	-0.006	0	39.46	0.00067	R	LDEAEQLALK	G				Cmpd 14456, AutoMSn(580.0097), 163.4 min (13229323981722315)	13A/AvB	0.176	16A/AvB	0.156	27A/AvB	0.192	29A/AvB	0.303	10B/AvB	0.338	21B/AvB	0.209	25B/AvB	0.171	37B/AvB	0.282	113	12392.9	114	6456.36	115	5729.3
1	Q9TV62	Myosin-4 OS=Sus scrofa GN=MYH4 PE=2 SV=1	30936	287893	1373	1373	114	114	110945	1	1	0	580.01	1737.01	3	1737.01	-0.0059	0	35.99	0.00087	R	LDEAEQLALK	G				Cmpd 14384, AutoMSn(580.0098), 162.6 min (13229323981722171)	13A/AvB	0.12	16A/AvB	0.296	27A/AvB	0.235	29A/AvB	0.147	10B/AvB	0.239	21B/AvB	0.247	25B/AvB	0.193	37B/AvB	0.322	113	2969.77	114	1486.27	115	3678.4
1	Q9TV62	Myosin-4 OS=Sus scrofa GN=MYH4 PE=2 SV=1	30936	287893	1373	1373	114	114	110946	1	1	0	580.01	1737.01	3	1737.01	-0.0059	0	46.37	8.2e-05	R	LDEAEQLALK	G				Cmpd 14655, AutoMSn(580.0098), 163.8 min (13229323981557926)	13A/AvB	0.215	16A/AvB	0.236	27A/AvB	0.266	29A/AvB	0.298	10B/AvB	0.259	21B/AvB	0.283	25B/AvB	0.199	37B/AvB	0.259	113	12172.7	114	10131.9	115	11095.7
1	Q9TV62	Myosin-4 OS=Sus scrofa GN=MYH4 PE=2 SV=1	30936	287893	1373	1373	114	114	110947	1	1	0	580.01	1737.01	3	1737.01	-0.0059	0	59.72	4.8e-06	R	LDEAEQLALK	G				Cmpd 14651, AutoMSn(580.0098), 162.7 min (13229323981819995)	13A/AvB	0.215	16A/AvB	0.21	27A/AvB	0.214	29A/AvB	0.308	10B/AvB	0.252	21B/AvB	0.225	25B/AvB	0.227	37B/AvB	0.296	113	55491.4	114	47350.9	115	46295.1
1	Q9TV62	Myosin-4 OS=Sus scrofa GN=MYH4 PE=2 SV=1	30936	287893	1373	1373	114	114	110948	1	1	0	580.01	1737.01	3	1737.01	-0.0057	0	37.5	0.00058	R	LDEAEQLALK	G				Cmpd 14528, AutoMSn(580.0098), 164.2 min (13229323981722459)	13A/AvB	0.263	16A/AvB	0.279	27A/AvB	0.203	29A/AvB	0.279	10B/AvB	0.29	21B/AvB	0.293	25B/AvB	0.119	37B/AvB	0.299	113	3168.95	114	2871.44	115	3043.45
1	Q9TV62	Myosin-4 OS=Sus scrofa GN=MYH4 PE=2 SV=1	30936	287893	1373	1373	114	114	110949	1	1	0	580.01	1737.01	3	1737.01	-0.0051	0	49.72	0.00012	R	LDEAEQLALK	G				Cmpd 14400, AutoMSn(580.0100), 160.8 min (13229323981868154)	13A/AvB	0.238	16A/AvB	0.189	27A/AvB	0.217	29A/AvB	0.283	10B/AvB	0.258	21B/AvB	0.205	25B/AvB	0.224	37B/AvB	0.313	113	40432.1	114	37308.9	115	29623.1
1	Q9TV62	Myosin-4 OS=Sus scrofa GN=MYH4 PE=2 SV=1	30936	287893	1373	1373	114	114	110950	1	1	0	580.01	1737.01	3	1737.01	-0.0048	0	18.25	0.019	R	LDEAEQLALK	G				Cmpd 14621, AutoMSn(580.0101), 163.4 min (13229323981557858)	13A/AvB	0.253	16A/AvB	0.462	27A/AvB	0.304	29A/AvB	0.303	10B/AvB	0.359	21B/AvB	0.241	25B/AvB	0.258	37B/AvB	0.142	113	5771.17	114	4075.98	115	7430.88
1	Q9TV62	Myosin-4 OS=Sus scrofa GN=MYH4 PE=2 SV=1	30936	287893	1373	1373	114	114	111484	1	1	1	885.504	1768.99	2	1769	-0.0093	0	40.13	0.0002	R	TLEDQLSEVK	T				Cmpd 11931, AutoMSn(885.5042), 134.4 min (13229323981766354)	13A/AvB	0.307	16A/AvB	-0.045	27A/AvB	0.021	29A/AvB	0.018	10B/AvB	0.095	21B/AvB	0.824	25B/AvB	-0.035	37B/AvB	0.116	113	1856.18	114	5974.65	115	-867.846
1	Q9TV62	Myosin-4 OS=Sus scrofa GN=MYH4 PE=2 SV=1	30936	287893	1373	1373	114	114	111485	1	1	1	885.505	1768.99	2	1769	-0.0088	0	59.73	1.2e-05	R	TLEDQLSEVK	T				Cmpd 11917, AutoMSn(885.5045), 131.9 min (13229323981814527)	13A/AvB	0.258	16A/AvB	0.235	27A/AvB	0.198	29A/AvB	0.203	10B/AvB	0.272	21B/AvB	0.272	25B/AvB	0.201	37B/AvB	0.255	113	13088.5	114	12414.6	115	11309.9
1	Q9TV62	Myosin-4 OS=Sus scrofa GN=MYH4 PE=2 SV=1	30936	287893	1373	1373	114	114	111486	1	1	1	885.505	1768.99	2	1769	-0.0082	0	29.69	0.0032	R	TLEDQLSEVK	T				Cmpd 11884, AutoMSn(885.5047), 134.1 min (13229323981717171)	13A/AvB	0.386	16A/AvB	0.308	27A/AvB	0.252	29A/AvB	0.35	10B/AvB	0.255	21B/AvB	0.273	25B/AvB	0.179	37B/AvB	0.292	113	1639.6	114	2479.41	115	1977.65
1	Q9TV62	Myosin-4 OS=Sus scrofa GN=MYH4 PE=2 SV=1	30936	287893	1373	1373	114	114	111487	1	1	1	885.505	1769	2	1769	-0.0079	0	53.8	4.5e-05	R	TLEDQLSEVK	T				Cmpd 11986, AutoMSn(885.5049), 132.7 min (13229323981814665)	13A/AvB	0.176	16A/AvB	0.188	27A/AvB	0.164	29A/AvB	0.223	10B/AvB	0.229	21B/AvB	0.293	25B/AvB	0.18	37B/AvB	0.298	113	14435	114	11088.3	115	11880.2
1	Q9TV62	Myosin-4 OS=Sus scrofa GN=MYH4 PE=2 SV=1	30936	287893	1373	1373	114	114	111489	1	1	1	885.505	1769	2	1769	-0.0075	0	41.04	0.0004	R	TLEDQLSEVK	T				Cmpd 11771, AutoMSn(885.5051), 131.1 min (13229323981862896)	13A/AvB	0.195	16A/AvB	0.254	27A/AvB	0.243	29A/AvB	0.243	10B/AvB	0.229	21B/AvB	0.244	25B/AvB	0.158	37B/AvB	0.37	113	8510.49	114	7266.68	115	9447.6
1	Q9TV62	Myosin-4 OS=Sus scrofa GN=MYH4 PE=2 SV=1	30936	287893	1373	1373	114	114	111490	1	1	1	885.505	1769	2	1769	-0.0074	0	40.56	0.00098	R	TLEDQLSEVK	T				Cmpd 11907, AutoMSn(885.5052), 134.3 min (13229323981717217)	13A/AvB	0.287	16A/AvB	0.266	27A/AvB	0.204	29A/AvB	0.308	10B/AvB	0.238	21B/AvB	0.266	25B/AvB	0.188	37B/AvB	0.308	113	4648.82	114	5600.24	115	5184.58
1	Q9TV62	Myosin-4 OS=Sus scrofa GN=MYH4 PE=2 SV=1	30936	287893	1373	1373	114	114	111491	1	1	1	885.505	1769	2	1769	-0.0074	0	41.52	0.00025	R	TLEDQLSEVK	T				Cmpd 12015, AutoMSn(885.5052), 133.9 min (13229323981552646)	13A/AvB	0.17	16A/AvB	0.216	27A/AvB	0.26	29A/AvB	0.249	10B/AvB	0.26	21B/AvB	0.32	25B/AvB	0.179	37B/AvB	0.241	113	6732.74	114	4394.33	115	5605.48
1	Q9TV62	Myosin-4 OS=Sus scrofa GN=MYH4 PE=2 SV=1	30936	287893	1373	1373	114	114	111492	1	1	1	885.506	1769	2	1769	-0.0066	0	31.75	0.0011	R	TLEDQLSEVK	T				Cmpd 12000, AutoMSn(885.5055), 135.2 min (13229323981766492)	13A/AvB	0.566	16A/AvB	-0.053	27A/AvB	0.414	29A/AvB	-0.009	10B/AvB	0.2	21B/AvB	0.559	25B/AvB	-0.044	37B/AvB	0.285	113	3243	114	9172.88	115	-863.053
1	Q9TV62	Myosin-4 OS=Sus scrofa GN=MYH4 PE=2 SV=1	30936	287893	1373	1373	114	114	111493	1	1	1	885.506	1769	2	1769	-0.0066	0	43.41	0.00028	R	TLEDQLSEVK	T				Cmpd 12111, AutoMSn(885.5055), 135.0 min (13229323981552838)	13A/AvB	0.198	16A/AvB	0.204	27A/AvB	0.225	29A/AvB	0.262	10B/AvB	0.2	21B/AvB	0.31	25B/AvB	0.223	37B/AvB	0.267	113	9946.57	114	9853.62	115	10150
1	Q9TV62	Myosin-4 OS=Sus scrofa GN=MYH4 PE=2 SV=1	30936	287893	1373	1373	114	114	111494	1	1	1	885.506	1769	2	1769	-0.0066	0	52.36	6.5e-05	R	TLEDQLSEVK	T				Cmpd 11699, AutoMSn(885.5056), 130.3 min (13229323981862752)	13A/AvB	0.197	16A/AvB	0.201	27A/AvB	0.233	29A/AvB	0.244	10B/AvB	0.209	21B/AvB	0.303	25B/AvB	0.176	37B/AvB	0.312	113	23880.8	114	22542	115	22900.5
1	Q9TV62	Myosin-4 OS=Sus scrofa GN=MYH4 PE=2 SV=1	30936	287893	1373	1373	114	114	111495	1	1	1	885.506	1769	2	1769	-0.0061	0	52.83	6e-05	R	TLEDQLSEVK	T				Cmpd 12039, AutoMSn(885.5058), 134.2 min (13229323981552694)	13A/AvB	0.201	16A/AvB	0.251	27A/AvB	0.242	29A/AvB	0.243	10B/AvB	0.252	21B/AvB	0.241	25B/AvB	0.184	37B/AvB	0.322	113	20070.5	114	16013.2	115	19940.3
1	Q9TV62	Myosin-4 OS=Sus scrofa GN=MYH4 PE=2 SV=1	30936	287893	1373	1373	114	114	111496	1	1	1	885.506	1769	2	1769	-0.0058	0	30.42	0.0043	R	TLEDQLSEVK	T				Cmpd 11677, AutoMSn(885.5060), 130.0 min (13229323981862708)	13A/AvB	0.262	16A/AvB	0.296	27A/AvB	0.209	29A/AvB	0.273	10B/AvB	0.244	21B/AvB	0.368	25B/AvB	0.185	37B/AvB	0.203	113	7908.13	114	8480.63	115	9582.17
1	Q9TV62	Myosin-4 OS=Sus scrofa GN=MYH4 PE=2 SV=1	30936	287893	1373	1373	114	114	111666	1	1	1	890.939	1779.86	2	1779.87	-0.0052	0	24.73	0.0082	R	TEELEEEIEAER	A				Cmpd 13584, AutoMSn(890.9387), 151.7 min (13229323981555784)	13A/AvB	0.244	16A/AvB	0.414	27A/AvB	0.271	29A/AvB	0.293	10B/AvB	0.227	21B/AvB	0.32	25B/AvB	0.189	37B/AvB	0.264	113	4627.13	114	4976.74	115	8447.93
1	Q9TV62	Myosin-4 OS=Sus scrofa GN=MYH4 PE=2 SV=1	30936	287893	1373	1373	114	114	111667	1	1	1	594.295	1779.86	3	1779.87	-0.0051	0	53.89	1e-05	R	TEELEEEIEAER	A				Cmpd 13656, AutoMSn(594.2949), 151.4 min (13229323981818005)	13A/AvB	0.205	16A/AvB	0.286	27A/AvB	0.21	29A/AvB	0.296	10B/AvB	0.266	21B/AvB	0.297	25B/AvB	0.197	37B/AvB	0.241	113	17608	114	13560.4	115	18917.3
1	Q9TV62	Myosin-4 OS=Sus scrofa GN=MYH4 PE=2 SV=1	30936	287893	1373	1373	114	114	111668	1	1	1	594.295	1779.86	3	1779.87	-0.0049	0	46.28	5.8e-05	R	TEELEEEIEAER	A				Cmpd 13601, AutoMSn(594.2950), 153.4 min (13229323981769694)	13A/AvB	-0.028	16A/AvB	0.207	27A/AvB	0.031	29A/AvB	0.016	10B/AvB	0.316	21B/AvB	0.598	25B/AvB	-0.027	37B/AvB	0.113	113	10316	114	-900.779	115	6752.8
1	Q9TV62	Myosin-4 OS=Sus scrofa GN=MYH4 PE=2 SV=1	30936	287893	1373	1373	114	114	111669	1	1	1	890.939	1779.86	2	1779.87	-0.0048	0	55.49	6.9e-06	R	TEELEEEIEAER	A				Cmpd 13679, AutoMSn(890.9389), 154.3 min (13229323981769850)	13A/AvB	0.494	16A/AvB	0.034	27A/AvB	0.475	29A/AvB	-0.011	10B/AvB	0.2	21B/AvB	0.546	25B/AvB	-0.047	37B/AvB	0.302	113	5250.34	114	12979.9	115	901.737
1	Q9TV62	Myosin-4 OS=Sus scrofa GN=MYH4 PE=2 SV=1	30936	287893	1373	1373	114	114	111670	1	1	1	890.939	1779.86	2	1779.87	-0.0043	0	59.49	2.8e-06	R	TEELEEEIEAER	A				Cmpd 13604, AutoMSn(890.9392), 153.7 min (13229323981720611)	13A/AvB	0.219	16A/AvB	0.135	27A/AvB	0.207	29A/AvB	0.141	10B/AvB	0.199	21B/AvB	0.44	25B/AvB	0.14	37B/AvB	0.221	113	6378.64	114	7037.75	115	4330.07
1	Q9TV62	Myosin-4 OS=Sus scrofa GN=MYH4 PE=2 SV=1	30936	287893	1373	1373	114	114	111671	1	1	1	890.939	1779.86	2	1779.87	-0.0042	0	34.37	0.0009	R	TEELEEEIEAER	A				Cmpd 13424, AutoMSn(890.9392), 151.6 min (13229323981720251)	13A/AvB	0.191	16A/AvB	0.207	27A/AvB	0.282	29A/AvB	0.32	10B/AvB	0.223	21B/AvB	0.381	25B/AvB	0.159	37B/AvB	0.237	113	3112.87	114	2667.85	115	2895.01
1	Q9TV62	Myosin-4 OS=Sus scrofa GN=MYH4 PE=2 SV=1	30936	287893	1373	1373	114	114	111673	1	1	1	594.295	1779.86	3	1779.87	-0.0038	0	38.81	0.00032	R	TEELEEEIEAER	A				Cmpd 13584, AutoMSn(594.2953), 150.6 min (13229323981817861)	13A/AvB	0.183	16A/AvB	0.314	27A/AvB	0.311	29A/AvB	0.278	10B/AvB	0.418	21B/AvB	0.227	25B/AvB	0.145	37B/AvB	0.211	113	27825	114	12225.3	115	20919.8
1	Q9TV62	Myosin-4 OS=Sus scrofa GN=MYH4 PE=2 SV=1	30936	287893	1373	1373	114	114	111674	1	1	1	890.939	1779.86	2	1779.87	-0.0038	0	54.69	8.5e-06	R	TEELEEEIEAER	A				Cmpd 13605, AutoMSn(890.9394), 151.9 min (13229323981555826)	13A/AvB	0.218	16A/AvB	0.229	27A/AvB	0.186	29A/AvB	0.238	10B/AvB	0.234	21B/AvB	0.353	25B/AvB	0.162	37B/AvB	0.251	113	13982.8	114	12999.5	115	13670.5
1	Q9TV62	Myosin-4 OS=Sus scrofa GN=MYH4 PE=2 SV=1	30936	287893	1373	1373	114	114	111675	1	1	1	890.939	1779.86	2	1779.87	-0.0037	0	50.25	2.4e-05	R	TEELEEEIEAER	A				Cmpd 13488, AutoMSn(890.9394), 152.2 min (13229323981769468)	13A/AvB	0.16	16A/AvB	0.2	27A/AvB	0	29A/AvB	-0.001	10B/AvB	0.178	21B/AvB	0.664	25B/AvB	-0.028	37B/AvB	0.186	113	9405.28	114	8437.81	115	10575.2
1	Q9TV62	Myosin-4 OS=Sus scrofa GN=MYH4 PE=2 SV=1	30936	287893	1373	1373	114	114	111676	1	1	1	594.295	1779.86	3	1779.87	-0.0035	0	22.28	0.015	R	TEELEEEIEAER	A				Cmpd 13686, AutoMSn(594.2955), 152.8 min (13229323981555988)	13A/AvB	0.17	16A/AvB	0.213	27A/AvB	0.218	29A/AvB	0.152	10B/AvB	0.404	21B/AvB	0.284	25B/AvB	0.132	37B/AvB	0.181	113	13625.7	114	5722.73	115	7183.38
1	Q9TV62	Myosin-4 OS=Sus scrofa GN=MYH4 PE=2 SV=1	30936	287893	1373	1373	114	114	111677	1	1	1	890.94	1779.86	2	1779.87	-0.0034	0	60.3	2.4e-06	R	TEELEEEIEAER	A				Cmpd 13460, AutoMSn(890.9396), 152.0 min (13229323981720323)	13A/AvB	0.302	16A/AvB	0.202	27A/AvB	0.203	29A/AvB	0.215	10B/AvB	0.241	21B/AvB	0.373	25B/AvB	0.155	37B/AvB	0.232	113	15166.3	114	19049.2	115	12727.1
1	Q9TV62	Myosin-4 OS=Sus scrofa GN=MYH4 PE=2 SV=1	30936	287893	1373	1373	114	114	111682	1	1	1	594.296	1779.87	3	1779.87	-0.0031	0	50.91	2.1e-05	R	TEELEEEIEAER	A				Cmpd 13380, AutoMSn(594.2956), 149.3 min (13229323981866114)	13A/AvB	0.173	16A/AvB	0.299	27A/AvB	0.237	29A/AvB	0.211	10B/AvB	0.263	21B/AvB	0.342	25B/AvB	0.19	37B/AvB	0.205	113	15563.3	114	10253.3	115	17668.1
1	Q9TV62	Myosin-4 OS=Sus scrofa GN=MYH4 PE=2 SV=1	30936	287893	1373	1373	114	114	111684	1	1	1	890.94	1779.87	2	1779.87	-0.003	0	55.6	7.2e-06	R	TEELEEEIEAER	A				Cmpd 13506, AutoMSn(890.9398), 149.8 min (13229323981817705)	13A/AvB	0.222	16A/AvB	0.318	27A/AvB	0.295	29A/AvB	0.283	10B/AvB	0.258	21B/AvB	0.317	25B/AvB	0.188	37B/AvB	0.237	113	8347.7	114	7180.26	115	10276.6
1	Q9TV62	Myosin-4 OS=Sus scrofa GN=MYH4 PE=2 SV=1	30936	287893	1373	1373	114	114	111685	1	1	1	890.94	1779.87	2	1779.87	-0.0028	0	62.34	1.5e-06	R	TEELEEEIEAER	A				Cmpd 13303, AutoMSn(890.9399), 148.4 min (13229323981865960)	13A/AvB	0.246	16A/AvB	0.266	27A/AvB	0.198	29A/AvB	0.227	10B/AvB	0.175	21B/AvB	0.434	25B/AvB	0.138	37B/AvB	0.253	113	9531.87	114	13378.3	115	14439.4
1	Q9TV62	Myosin-4 OS=Sus scrofa GN=MYH4 PE=2 SV=1	30936	287893	1373	1373	114	114	111686	1	1	1	890.94	1779.87	2	1779.87	-0.0028	0	60.25	2.5e-06	R	TEELEEEIEAER	A				Cmpd 13482, AutoMSn(890.9399), 150.4 min (13229323981866318)	13A/AvB	0.245	16A/AvB	0.245	27A/AvB	0.215	29A/AvB	0.226	10B/AvB	0.265	21B/AvB	0.325	25B/AvB	0.165	37B/AvB	0.245	113	46694.4	114	43076.1	115	43190.2
1	Q9TV62	Myosin-4 OS=Sus scrofa GN=MYH4 PE=2 SV=1	30936	287893	1373	1373	114	114	111687	1	1	1	890.94	1779.87	2	1779.87	-0.0028	0	58.5	3.7e-06	R	TEELEEEIEAER	A				Cmpd 13721, AutoMSn(890.9399), 152.2 min (13229323981818135)	13A/AvB	0.244	16A/AvB	0.233	27A/AvB	0.196	29A/AvB	0.212	10B/AvB	0.201	21B/AvB	0.36	25B/AvB	0.167	37B/AvB	0.272	113	38842.5	114	47124.4	115	45108.2
1	Q9TV62	Myosin-4 OS=Sus scrofa GN=MYH4 PE=2 SV=1	30936	287893	1373	1373	114	114	111688	1	1	1	890.94	1779.87	2	1779.87	-0.0027	0	60.29	2.4e-06	R	TEELEEEIEAER	A				Cmpd 13785, AutoMSn(890.9399), 154.0 min (13229323981556186)	13A/AvB	0.231	16A/AvB	0.212	27A/AvB	0.182	29A/AvB	0.222	10B/AvB	0.202	21B/AvB	0.337	25B/AvB	0.179	37B/AvB	0.283	113	19915.1	114	22854.5	115	20914.5
1	Q9TV62	Myosin-4 OS=Sus scrofa GN=MYH4 PE=2 SV=1	30936	287893	1373	1373	114	114	111689	1	1	1	890.94	1779.87	2	1779.87	-0.0026	0	17.88	0.042	R	TEELEEEIEAER	A				Cmpd 13274, AutoMSn(890.9400), 148.0 min (13229323981865902)	13A/AvB	0.271	16A/AvB	0.255	27A/AvB	0.328	29A/AvB	0.15	10B/AvB	0.281	21B/AvB	0.39	25B/AvB	0.132	37B/AvB	0.196	113	5314.8	114	5121.69	115	4820.99
1	Q9TV62	Myosin-4 OS=Sus scrofa GN=MYH4 PE=2 SV=1	30936	287893	1373	1373	114	114	111690	1	1	1	890.94	1779.87	2	1779.87	-0.0026	0	63.26	1.2e-06	R	TEELEEEIEAER	A				Cmpd 13494, AutoMSn(890.9400), 152.4 min (13229323981720391)	13A/AvB	0.224	16A/AvB	0.252	27A/AvB	0.191	29A/AvB	0.226	10B/AvB	0.223	21B/AvB	0.357	25B/AvB	0.165	37B/AvB	0.255	113	27037.8	114	27231.3	115	30636
1	Q9TV62	Myosin-4 OS=Sus scrofa GN=MYH4 PE=2 SV=1	30936	287893	1373	1373	114	114	111691	1	1	1	594.296	1779.87	3	1779.87	-0.0025	0	29.13	0.0032	R	TEELEEEIEAER	A				Cmpd 13532, AutoMSn(594.2958), 152.6 min (13229323981769556)	13A/AvB	-0.049	16A/AvB	0.971	27A/AvB	0.626	29A/AvB	-0.014	10B/AvB	0.671	21B/AvB	-0.009	25B/AvB	-0.032	37B/AvB	0.37	113	10683.1	114	-783.446	115	15454.3
1	Q9TV62	Myosin-4 OS=Sus scrofa GN=MYH4 PE=2 SV=1	30936	287893	1373	1373	114	114	111692	1	1	1	890.94	1779.87	2	1779.87	-0.0025	0	62.59	1.4e-06	R	TEELEEEIEAER	A				Cmpd 13535, AutoMSn(890.9401), 150.1 min (13229323981817763)	13A/AvB	0.248	16A/AvB	0.237	27A/AvB	0.204	29A/AvB	0.196	10B/AvB	0.238	21B/AvB	0.365	25B/AvB	0.154	37B/AvB	0.243	113	32104.3	114	33481.7	115	31914.9
1	Q9TV62	Myosin-4 OS=Sus scrofa GN=MYH4 PE=2 SV=1	30936	287893	1373	1373	114	114	111693	1	1	1	890.94	1779.87	2	1779.87	-0.0022	0	60.81	2.2e-06	R	TEELEEEIEAER	A				Cmpd 13536, AutoMSn(890.9402), 152.7 min (13229323981769564)	13A/AvB	0.31	16A/AvB	-0.014	27A/AvB	0.009	29A/AvB	0.008	10B/AvB	0.128	21B/AvB	0.719	25B/AvB	-0.026	37B/AvB	0.179	113	25406	114	61647.9	115	-2818.58
1	Q9TV62	Myosin-4 OS=Sus scrofa GN=MYH4 PE=2 SV=1	30936	287893	1373	1373	114	114	111694	1	1	1	890.94	1779.87	2	1779.87	-0.0021	0	60.49	2.3e-06	R	TEELEEEIEAER	A				Cmpd 13641, AutoMSn(890.9403), 152.3 min (13229323981555898)	13A/AvB	0.29	16A/AvB	0.244	27A/AvB	0.199	29A/AvB	0.224	10B/AvB	0.211	21B/AvB	0.371	25B/AvB	0.159	37B/AvB	0.259	113	40290.6	114	55546	115	46608.3
1	Q9TV62	Myosin-4 OS=Sus scrofa GN=MYH4 PE=2 SV=1	30936	287893	1373	1373	114	114	111695	1	1	1	890.94	1779.87	2	1779.87	-0.0021	0	60.43	2.4e-06	R	TEELEEEIEAER	A				Cmpd 13607, AutoMSn(890.9403), 153.5 min (13229323981769706)	13A/AvB	0.323	16A/AvB	-0.008	27A/AvB	0	29A/AvB	0.01	10B/AvB	0.144	21B/AvB	0.712	25B/AvB	-0.03	37B/AvB	0.174	113	35723.5	114	80384.2	115	-2056.54
1	Q9TV62	Myosin-4 OS=Sus scrofa GN=MYH4 PE=2 SV=1	30936	287893	1373	1373	114	114	111696	1	1	1	890.94	1779.87	2	1779.87	-0.002	0	72.43	1.5e-07	R	TEELEEEIEAER	A				Cmpd 13532, AutoMSn(890.9403), 152.9 min (13229323981720467)	13A/AvB	0.244	16A/AvB	0.266	27A/AvB	0.218	29A/AvB	0.238	10B/AvB	0.219	21B/AvB	0.364	25B/AvB	0.138	37B/AvB	0.279	113	29014.7	114	32343.1	115	35204.2
1	Q9TV62	Myosin-4 OS=Sus scrofa GN=MYH4 PE=2 SV=1	30936	287893	1373	1373	114	114	111697	1	1	1	594.296	1779.87	3	1779.87	-0.0018	0	28.44	0.0038	R	TEELEEEIEAER	A				Cmpd 13323, AutoMSn(594.2960), 148.6 min (13229323981866000)	13A/AvB	0.158	16A/AvB	0.289	27A/AvB	0.269	29A/AvB	0.228	10B/AvB	0.374	21B/AvB	0.245	25B/AvB	0.122	37B/AvB	0.259	113	10115	114	4279.68	115	7817.99
1	Q9TV62	Myosin-4 OS=Sus scrofa GN=MYH4 PE=2 SV=1	30936	287893	1373	1373	114	114	111698	1	1	1	890.94	1779.87	2	1779.87	-0.0017	0	60.29	2.5e-06	R	TEELEEEIEAER	A				Cmpd 13338, AutoMSn(890.9404), 148.8 min (13229323981866030)	13A/AvB	0.254	16A/AvB	0.245	27A/AvB	0.213	29A/AvB	0.239	10B/AvB	0.212	21B/AvB	0.364	25B/AvB	0.183	37B/AvB	0.241	113	39895.8	114	47738.4	115	45983.9
1	Q9TV62	Myosin-4 OS=Sus scrofa GN=MYH4 PE=2 SV=1	30936	287893	1373	1373	114	114	111699	1	1	1	890.941	1779.87	2	1779.87	-0.0012	0	60.82	2.1e-06	R	TEELEEEIEAER	A				Cmpd 13383, AutoMSn(890.9407), 149.3 min (13229323981866120)	13A/AvB	0.26	16A/AvB	0.216	27A/AvB	0.21	29A/AvB	0.223	10B/AvB	0.197	21B/AvB	0.379	25B/AvB	0.166	37B/AvB	0.257	113	100786	114	132935	115	110144
1	Q9TV62	Myosin-4 OS=Sus scrofa GN=MYH4 PE=2 SV=1	30936	287893	1373	1373	114	114	111700	1	1	1	890.941	1779.87	2	1779.87	-0.0011	0	62.67	1.5e-06	R	TEELEEEIEAER	A				Cmpd 13577, AutoMSn(890.9407), 150.6 min (13229323981817847)	13A/AvB	0.252	16A/AvB	0.253	27A/AvB	0.225	29A/AvB	0.216	10B/AvB	0.217	21B/AvB	0.352	25B/AvB	0.17	37B/AvB	0.261	113	81711.4	114	95168.7	115	95489
1	Q9TV62	Myosin-4 OS=Sus scrofa GN=MYH4 PE=2 SV=1	30936	287893	1373	1373	114	114	111701	1	1	1	890.941	1779.87	2	1779.87	-0.0009	0	72.37	1.6e-07	R	TEELEEEIEAER	A				Cmpd 13649, AutoMSn(890.9408), 151.4 min (13229323981817991)	13A/AvB	0.241	16A/AvB	0.239	27A/AvB	0.219	29A/AvB	0.233	10B/AvB	0.204	21B/AvB	0.378	25B/AvB	0.164	37B/AvB	0.254	113	89316.9	114	105677	115	104602
1	Q9TV62	Myosin-4 OS=Sus scrofa GN=MYH4 PE=2 SV=1	30936	287893	1373	1373	114	114	111702	1	1	1	890.941	1779.87	2	1779.87	-0.0008	0	59.66	3e-06	R	TEELEEEIEAER	A				Cmpd 13410, AutoMSn(890.9409), 149.6 min (13229323981866174)	13A/AvB	0.251	16A/AvB	0.227	27A/AvB	0.219	29A/AvB	0.227	10B/AvB	0.207	21B/AvB	0.378	25B/AvB	0.16	37B/AvB	0.254	113	102049	114	123513	115	111800
1	Q9TV62	Myosin-4 OS=Sus scrofa GN=MYH4 PE=2 SV=1	30936	287893	1373	1373	114	114	111703	1	1	1	890.941	1779.87	2	1779.87	-0.0006	0	72.55	1.6e-07	R	TEELEEEIEAER	A				Cmpd 13713, AutoMSn(890.9410), 153.1 min (13229323981556042)	13A/AvB	0.234	16A/AvB	0.231	27A/AvB	0.211	29A/AvB	0.221	10B/AvB	0.219	21B/AvB	0.356	25B/AvB	0.175	37B/AvB	0.25	113	66959.8	114	71749.9	115	70694
1	Q9TV62	Myosin-4 OS=Sus scrofa GN=MYH4 PE=2 SV=1	30936	287893	1373	1373	114	114	112257	1	1	1	910.491	1818.97	2	1818.97	-0.0071	1	19.33	0.015	R	RVAEQELLDASER	V				Cmpd 11906, AutoMSn(910.4909), 131.8 min (13229323981814505)	13A/AvB	0.124	16A/AvB	0.325	27A/AvB	0.246	29A/AvB	0.203	10B/AvB	0.284	21B/AvB	0.47	25B/AvB	0.078	37B/AvB	0.168	113	6166.37	114	2690.74	115	7061.33
1	Q9TV62	Myosin-4 OS=Sus scrofa GN=MYH4 PE=2 SV=1	30936	287893	1373	1373	114	114	112260	1	1	1	607.33	1818.97	3	1818.97	-0.0056	1	51.34	1.5e-05	R	RVAEQELLDASER	V				Cmpd 12159, AutoMSn(607.3301), 134.7 min (13229323981815011)	13A/AvB	0.232	16A/AvB	0.39	27A/AvB	0.276	29A/AvB	0.208	10B/AvB	0.252	21B/AvB	0.403	25B/AvB	0.118	37B/AvB	0.227	113	21123.7	114	19408.3	115	32707.5
1	Q9TV62	Myosin-4 OS=Sus scrofa GN=MYH4 PE=2 SV=1	30936	287893	1373	1373	114	114	112262	1	1	1	910.492	1818.97	2	1818.97	-0.0051	1	28.39	0.0026	R	RVAEQELLDASER	V				Cmpd 12237, AutoMSn(910.4918), 138.1 min (13229323981717877)	13A/AvB	0.213	16A/AvB	0.176	27A/AvB	0.387	29A/AvB	0.208	10B/AvB	0.23	21B/AvB	0.445	25B/AvB	0.168	37B/AvB	0.157	113	1719.71	114	1585.77	115	1316.43
1	Q9TV62	Myosin-4 OS=Sus scrofa GN=MYH4 PE=2 SV=1	30936	287893	1373	1373	114	114	112263	1	1	1	910.492	1818.97	2	1818.97	-0.0051	1	26.86	0.003	R	RVAEQELLDASER	V				Cmpd 12386, AutoMSn(910.4918), 138.1 min (13229323981553388)	13A/AvB	0.156	16A/AvB	0.257	27A/AvB	0.186	29A/AvB	0.158	10B/AvB	0.288	21B/AvB	0.412	25B/AvB	0.091	37B/AvB	0.209	113	7491.99	114	4062.51	115	6684.43
1	Q9TV62	Myosin-4 OS=Sus scrofa GN=MYH4 PE=2 SV=1	30936	287893	1373	1373	114	114	112264	1	1	1	607.33	1818.97	3	1818.97	-0.0051	1	30.42	0.0026	R	RVAEQELLDASER	V				Cmpd 12356, AutoMSn(607.3303), 139.5 min (13229323981718115)	13A/AvB	0.168	16A/AvB	0.234	27A/AvB	0.129	29A/AvB	0.161	10B/AvB	0.314	21B/AvB	0.337	25B/AvB	0.184	37B/AvB	0.165	113	4583.76	114	2453.74	115	3414.88
1	Q9TV62	Myosin-4 OS=Sus scrofa GN=MYH4 PE=2 SV=1	30936	287893	1373	1373	114	114	112266	1	1	1	910.492	1818.97	2	1818.97	-0.0049	1	42.34	0.00028	R	RVAEQELLDASER	V				Cmpd 12121, AutoMSn(910.4919), 134.2 min (13229323981814935)	13A/AvB	0.244	16A/AvB	0.349	27A/AvB	0.262	29A/AvB	0.187	10B/AvB	0.201	21B/AvB	0.403	25B/AvB	0.168	37B/AvB	0.228	113	4944.16	114	5995.65	115	8584.94
1	Q9TV62	Myosin-4 OS=Sus scrofa GN=MYH4 PE=2 SV=1	30936	287893	1373	1373	114	114	112267	1	1	1	607.33	1818.97	3	1818.97	-0.0047	1	60.5	2.1e-06	R	RVAEQELLDASER	V				Cmpd 11723, AutoMSn(607.3304), 130.6 min (13229323981862800)	13A/AvB	0.275	16A/AvB	0.295	27A/AvB	0.224	29A/AvB	0.209	10B/AvB	0.318	21B/AvB	0.312	25B/AvB	0.175	37B/AvB	0.195	113	28483.9	114	24571	115	26406.5
1	Q9TV62	Myosin-4 OS=Sus scrofa GN=MYH4 PE=2 SV=1	30936	287893	1373	1373	114	114	112268	1	1	1	910.492	1818.97	2	1818.97	-0.0046	1	23.06	0.0069	R	RVAEQELLDASER	V				Cmpd 11652, AutoMSn(910.4921), 129.8 min (13229323981862658)	13A/AvB	0.224	16A/AvB	0.249	27A/AvB	0.233	29A/AvB	0.237	10B/AvB	0.25	21B/AvB	0.428	25B/AvB	0.143	37B/AvB	0.179	113	7448.22	114	6685.21	115	7424.32
1	Q9TV62	Myosin-4 OS=Sus scrofa GN=MYH4 PE=2 SV=1	30936	287893	1373	1373	114	114	112269	1	1	1	607.331	1818.97	3	1818.97	-0.0045	1	53.56	9.5e-06	R	RVAEQELLDASER	V				Cmpd 11884, AutoMSn(607.3305), 131.6 min (13229323981814461)	13A/AvB	0.263	16A/AvB	0.385	27A/AvB	0.264	29A/AvB	0.23	10B/AvB	0.231	21B/AvB	0.395	25B/AvB	0.166	37B/AvB	0.208	113	17212.7	114	19638.6	115	28731.7
1	Q9TV62	Myosin-4 OS=Sus scrofa GN=MYH4 PE=2 SV=1	30936	287893	1373	1373	114	114	112271	1	1	1	607.331	1818.97	3	1818.97	-0.0043	1	59.42	2.7e-06	R	RVAEQELLDASER	V				Cmpd 12285, AutoMSn(607.3305), 138.6 min (13229323981717973)	13A/AvB	0.211	16A/AvB	0.176	27A/AvB	0.23	29A/AvB	0.162	10B/AvB	0.176	21B/AvB	0.34	25B/AvB	0.2	37B/AvB	0.284	113	2825.58	114	3391.61	115	2825.67
1	Q9TV62	Myosin-4 OS=Sus scrofa GN=MYH4 PE=2 SV=1	30936	287893	1373	1373	114	114	112272	1	1	1	607.331	1818.97	3	1818.97	-0.0043	1	45.24	0.00023	R	RVAEQELLDASER	V				Cmpd 12213, AutoMSn(607.3306), 137.8 min (13229323981717829)	13A/AvB	0.205	16A/AvB	0.352	27A/AvB	0.147	29A/AvB	0.2	10B/AvB	0.255	21B/AvB	0.418	25B/AvB	0.146	37B/AvB	0.181	113	4701.71	114	3778.68	115	6482.75
1	Q9TV62	Myosin-4 OS=Sus scrofa GN=MYH4 PE=2 SV=1	30936	287893	1373	1373	114	114	112273	1	1	1	607.331	1818.97	3	1818.97	-0.0043	1	62.39	1.4e-06	R	RVAEQELLDASER	V				Cmpd 12317, AutoMSn(607.3305), 138.8 min (13229323981767126)	13A/AvB	0.471	16A/AvB	1.534	27A/AvB	1.027	29A/AvB	-0.022	10B/AvB	0.468	21B/AvB	0.094	25B/AvB	-0.057	37B/AvB	0.495	113	7689.5	114	7740.3	115	25197.5
1	Q9TV62	Myosin-4 OS=Sus scrofa GN=MYH4 PE=2 SV=1	30936	287893	1373	1373	114	114	112274	1	1	1	607.331	1818.97	3	1818.97	-0.0041	1	55.73	5.9e-06	R	RVAEQELLDASER	V				Cmpd 12087, AutoMSn(607.3306), 133.9 min (13229323981814867)	13A/AvB	0.19	16A/AvB	0.337	27A/AvB	0.236	29A/AvB	0.208	10B/AvB	0.206	21B/AvB	0.405	25B/AvB	0.165	37B/AvB	0.224	113	23854.7	114	21929.7	115	38926.4
1	Q9TV62	Myosin-4 OS=Sus scrofa GN=MYH4 PE=2 SV=1	30936	287893	1373	1373	114	114	112275	1	1	1	607.331	1818.97	3	1818.97	-0.0041	1	75.16	2.4e-07	R	RVAEQELLDASER	V				Cmpd 11955, AutoMSn(607.3306), 132.4 min (13229323981814603)	13A/AvB	0.245	16A/AvB	0.295	27A/AvB	0.191	29A/AvB	0.207	10B/AvB	0.259	21B/AvB	0.355	25B/AvB	0.173	37B/AvB	0.213	113	35722.7	114	33864.8	115	40662.8
1	Q9TV62	Myosin-4 OS=Sus scrofa GN=MYH4 PE=2 SV=1	30936	287893	1373	1373	114	114	112276	1	1	1	607.331	1818.97	3	1818.97	-0.0041	1	46.95	4e-05	R	RVAEQELLDASER	V				Cmpd 11507, AutoMSn(607.3306), 128.1 min (13229323981862368)	13A/AvB	0.288	16A/AvB	0.327	27A/AvB	0.248	29A/AvB	0.2	10B/AvB	0.229	21B/AvB	0.377	25B/AvB	0.149	37B/AvB	0.245	113	23676	114	29795.5	115	33878.7
1	Q9TV62	Myosin-4 OS=Sus scrofa GN=MYH4 PE=2 SV=1	30936	287893	1373	1373	114	114	112279	1	1	1	910.492	1818.97	2	1818.97	-0.0041	1	19.35	0.015	R	RVAEQELLDASER	V				Cmpd 12233, AutoMSn(910.4923), 137.9 min (13229323981766958)	13A/AvB	-0.073	16A/AvB	1.281	27A/AvB	0.481	29A/AvB	-0.011	10B/AvB	0.632	21B/AvB	0.102	25B/AvB	-0.03	37B/AvB	0.296	113	4290.56	114	-493.785	115	8702.15
1	Q9TV62	Myosin-4 OS=Sus scrofa GN=MYH4 PE=2 SV=1	30936	287893	1373	1373	114	114	112283	1	1	1	910.492	1818.97	2	1818.97	-0.0039	1	19.77	0.014	R	RVAEQELLDASER	V				Cmpd 11510, AutoMSn(910.4924), 128.1 min (13229323981862374)	13A/AvB	0.261	16A/AvB	0.259	27A/AvB	0.212	29A/AvB	0.257	10B/AvB	0.218	21B/AvB	0.417	25B/AvB	0.162	37B/AvB	0.203	113	4806.54	114	5762.76	115	5716.2
1	Q9TV62	Myosin-4 OS=Sus scrofa GN=MYH4 PE=2 SV=1	30936	287893	1373	1373	114	114	112284	1	1	1	910.492	1818.97	2	1818.97	-0.0039	1	37.97	0.00029	R	RVAEQELLDASER	V				Cmpd 12045, AutoMSn(910.4925), 133.4 min (13229323981814783)	13A/AvB	0.14	16A/AvB	0.265	27A/AvB	0.158	29A/AvB	0.123	10B/AvB	0.261	21B/AvB	0.449	25B/AvB	0.1	37B/AvB	0.19	113	13639.6	114	7328.1	115	13888.3
1	Q9TV62	Myosin-4 OS=Sus scrofa GN=MYH4 PE=2 SV=1	30936	287893	1373	1373	114	114	112286	1	1	1	607.331	1818.97	3	1818.97	-0.0038	1	45.11	0.00011	R	RVAEQELLDASER	V				Cmpd 12140, AutoMSn(607.3307), 137.0 min (13229323981717683)	13A/AvB	0.34	16A/AvB	0.224	27A/AvB	0.253	29A/AvB	0.275	10B/AvB	0.228	21B/AvB	0.43	25B/AvB	0.075	37B/AvB	0.266	113	4463.87	114	6638.79	115	4380.97
1	Q9TV62	Myosin-4 OS=Sus scrofa GN=MYH4 PE=2 SV=1	30936	287893	1373	1373	114	114	112287	1	1	1	607.331	1818.97	3	1818.97	-0.0038	1	55.99	1.4e-05	R	RVAEQELLDASER	V				Cmpd 12327, AutoMSn(607.3307), 137.5 min (13229323981553270)	13A/AvB	0.218	16A/AvB	0.32	27A/AvB	0.254	29A/AvB	0.196	10B/AvB	0.231	21B/AvB	0.364	25B/AvB	0.145	37B/AvB	0.26	113	10473.8	114	9887.5	115	14520.1
1	Q9TV62	Myosin-4 OS=Sus scrofa GN=MYH4 PE=2 SV=1	30936	287893	1373	1373	114	114	112288	1	1	1	607.331	1818.97	3	1818.97	-0.0038	1	35.47	0.00047	R	RVAEQELLDASER	V				Cmpd 12173, AutoMSn(607.3307), 137.2 min (13229323981766838)	13A/AvB	-0.079	16A/AvB	1.232	27A/AvB	0.709	29A/AvB	-0.015	10B/AvB	0.73	21B/AvB	0.052	25B/AvB	-0.039	37B/AvB	0.257	113	13905.6	114	-1504.63	115	23468.5
1	Q9TV62	Myosin-4 OS=Sus scrofa GN=MYH4 PE=2 SV=1	30936	287893	1373	1373	114	114	112290	1	1	1	607.331	1818.97	3	1818.97	-0.0036	1	56	8.8e-06	R	RVAEQELLDASER	V				Cmpd 12389, AutoMSn(607.3308), 139.7 min (13229323981767270)	13A/AvB	1.858	16A/AvB	0.302	27A/AvB	1.107	29A/AvB	-0.024	10B/AvB	0.525	21B/AvB	0.165	25B/AvB	-0.063	37B/AvB	0.373	113	5133.28	114	18162.3	115	2947.85
1	Q9TV62	Myosin-4 OS=Sus scrofa GN=MYH4 PE=2 SV=1	30936	287893	1373	1373	114	114	112291	1	1	1	607.331	1818.97	3	1818.97	-0.0036	1	74.47	2.8e-07	R	RVAEQELLDASER	V				Cmpd 12246, AutoMSn(607.3308), 138.0 min (13229323981766984)	13A/AvB	0.242	16A/AvB	0.328	27A/AvB	0.507	29A/AvB	-0.011	10B/AvB	0.266	21B/AvB	0.531	25B/AvB	-0.048	37B/AvB	0.251	113	7948.81	114	7227.53	115	9825.55
1	Q9TV62	Myosin-4 OS=Sus scrofa GN=MYH4 PE=2 SV=1	30936	287893	1373	1373	114	114	112292	1	1	1	607.331	1818.97	3	1818.97	-0.0036	1	17.77	0.022	R	RVAEQELLDASER	V				Cmpd 11436, AutoMSn(607.3308), 127.3 min (13229323981862226)	13A/AvB	0.42	16A/AvB	0.437	27A/AvB	0.297	29A/AvB	0.177	10B/AvB	0.236	21B/AvB	0.408	25B/AvB	0.203	37B/AvB	0.153	113	17249.3	114	30700.6	115	31914.1
1	Q9TV62	Myosin-4 OS=Sus scrofa GN=MYH4 PE=2 SV=1	30936	287893	1373	1373	114	114	112295	1	1	1	910.493	1818.97	2	1818.97	-0.0032	1	27.24	0.0028	R	RVAEQELLDASER	V				Cmpd 11973, AutoMSn(910.4928), 132.6 min (13229323981814639)	13A/AvB	0.156	16A/AvB	0.246	27A/AvB	0.204	29A/AvB	0.183	10B/AvB	0.294	21B/AvB	0.436	25B/AvB	0.111	37B/AvB	0.159	113	12573.9	114	6663.8	115	10549.4
1	Q9TV62	Myosin-4 OS=Sus scrofa GN=MYH4 PE=2 SV=1	30936	287893	1373	1373	114	114	112296	1	1	1	607.331	1818.97	3	1818.97	-0.003	1	20.42	0.022	R	RVAEQELLDASER	V				Cmpd 12069, AutoMSn(607.3310), 136.2 min (13229323981717541)	13A/AvB	0.448	16A/AvB	0.513	27A/AvB	0.274	29A/AvB	0.251	10B/AvB	0.246	21B/AvB	0.436	25B/AvB	0.104	37B/AvB	0.213	113	1588.01	114	2894.89	115	3315.66
1	Q9TV62	Myosin-4 OS=Sus scrofa GN=MYH4 PE=2 SV=1	30936	287893	1373	1373	114	114	112297	1	1	1	607.331	1818.97	3	1818.97	-0.003	1	55.88	6e-06	R	RVAEQELLDASER	V				Cmpd 12256, AutoMSn(607.3310), 136.7 min (13229323981553128)	13A/AvB	0.216	16A/AvB	0.277	27A/AvB	0.175	29A/AvB	0.243	10B/AvB	0.235	21B/AvB	0.38	25B/AvB	0.14	37B/AvB	0.245	113	13345.8	114	12316.2	115	15764.8
1	Q9TV62	Myosin-4 OS=Sus scrofa GN=MYH4 PE=2 SV=1	30936	287893	1373	1373	114	114	112298	1	1	1	607.331	1818.97	3	1818.97	-0.003	1	32.07	0.0039	R	RVAEQELLDASER	V				Cmpd 12399, AutoMSn(607.3310), 138.3 min (13229323981553414)	13A/AvB	0.156	16A/AvB	0.388	27A/AvB	0.25	29A/AvB	0.2	10B/AvB	0.32	21B/AvB	0.383	25B/AvB	0.129	37B/AvB	0.169	113	9872.72	114	4809.16	115	11981.3
1	Q9TV62	Myosin-4 OS=Sus scrofa GN=MYH4 PE=2 SV=1	30936	287893	1373	1373	114	114	112299	1	1	1	910.493	1818.97	2	1818.97	-0.003	1	19.3	0.015	R	RVAEQELLDASER	V				Cmpd 12170, AutoMSn(910.4929), 135.7 min (13229323981552956)	13A/AvB	0.216	16A/AvB	0.23	27A/AvB	0.14	29A/AvB	0.177	10B/AvB	0.342	21B/AvB	0.297	25B/AvB	0.177	37B/AvB	0.184	113	11033.3	114	6957.62	115	7405.25
1	Q9TV62	Myosin-4 OS=Sus scrofa GN=MYH4 PE=2 SV=1	30936	287893	1373	1373	114	114	112300	1	1	1	910.493	1818.97	2	1818.97	-0.0029	1	23.58	0.035	R	RVAEQELLDASER	V				Cmpd 12314, AutoMSn(910.4929), 137.3 min (13229323981553244)	13A/AvB	0.176	16A/AvB	0.248	27A/AvB	0.206	29A/AvB	0.127	10B/AvB	0.225	21B/AvB	0.342	25B/AvB	0.193	37B/AvB	0.24	113	9247.31	114	7236.19	115	10170.2
1	Q9TV62	Myosin-4 OS=Sus scrofa GN=MYH4 PE=2 SV=1	30936	287893	1373	1373	114	114	112301	1	1	1	910.493	1818.97	2	1818.97	-0.0029	1	39.48	0.00071	R	RVAEQELLDASER	V				Cmpd 11580, AutoMSn(910.4929), 128.9 min (13229323981862514)	13A/AvB	0.183	16A/AvB	0.236	27A/AvB	0.128	29A/AvB	0.178	10B/AvB	0.25	21B/AvB	0.371	25B/AvB	0.154	37B/AvB	0.226	113	8195.89	114	6008.16	115	7750.92
1	Q9TV62	Myosin-4 OS=Sus scrofa GN=MYH4 PE=2 SV=1	30936	287893	1373	1373	114	114	112302	1	1	1	607.331	1818.97	3	1818.97	-0.0029	1	69.49	9e-07	R	RVAEQELLDASER	V				Cmpd 11651, AutoMSn(607.3311), 129.8 min (13229323981862656)	13A/AvB	0.209	16A/AvB	0.272	27A/AvB	0.193	29A/AvB	0.208	10B/AvB	0.246	21B/AvB	0.317	25B/AvB	0.178	37B/AvB	0.259	113	31317.1	114	26570.9	115	34645.3
1	Q9TV62	Myosin-4 OS=Sus scrofa GN=MYH4 PE=2 SV=1	30936	287893	1373	1373	114	114	112303	1	1	1	607.331	1818.97	3	1818.97	-0.0027	1	75.74	2.1e-07	R	RVAEQELLDASER	V				Cmpd 11579, AutoMSn(607.3311), 128.9 min (13229323981862512)	13A/AvB	0.202	16A/AvB	0.273	27A/AvB	0.21	29A/AvB	0.198	10B/AvB	0.289	21B/AvB	0.317	25B/AvB	0.138	37B/AvB	0.256	113	40251.2	114	28163.1	115	38033.8
1	Q9TV62	Myosin-4 OS=Sus scrofa GN=MYH4 PE=2 SV=1	30936	287893	1373	1373	114	114	112304	1	1	1	607.331	1818.97	3	1818.97	-0.0027	1	42.67	0.00021	R	RVAEQELLDASER	V				Cmpd 12184, AutoMSn(607.3311), 135.8 min (13229323981552984)	13A/AvB	0.273	16A/AvB	0.469	27A/AvB	0.326	29A/AvB	0.266	10B/AvB	0.247	21B/AvB	0.349	25B/AvB	0.201	37B/AvB	0.204	113	9149.09	114	10131.6	115	17404.4
1	Q9TV62	Myosin-4 OS=Sus scrofa GN=MYH4 PE=2 SV=1	30936	287893	1373	1373	114	114	112305	1	1	1	910.493	1818.97	2	1818.97	-0.0027	1	49.92	8.1e-05	R	RVAEQELLDASER	V				Cmpd 12242, AutoMSn(910.4930), 136.5 min (13229323981553100)	13A/AvB	0.177	16A/AvB	0.225	27A/AvB	0.142	29A/AvB	0.194	10B/AvB	0.267	21B/AvB	0.373	25B/AvB	0.14	37B/AvB	0.22	113	12180.7	114	8060.59	115	10234
1	Q9TV62	Myosin-4 OS=Sus scrofa GN=MYH4 PE=2 SV=1	30936	287893	1373	1373	114	114	112382	1	1	0	459.011	1832.01	4	1832.03	-0.0115	1	15.53	0.035	R	TKYETDAIQR	T				Cmpd 6931, AutoMSn(459.0107), 77.4 min (13229323981853216)	13A/AvB	0.219	16A/AvB	0.412	27A/AvB	0.312	29A/AvB	0.221	10B/AvB	0.299	21B/AvB	0.408	25B/AvB	0.116	37B/AvB	0.178	113	50947.5	114	37343.4	115	70231.1
1	Q9TV62	Myosin-4 OS=Sus scrofa GN=MYH4 PE=2 SV=1	30936	287893	1373	1373	114	114	112424	1	1	0	612.989	1835.95	3	1835.95	-0.0087	0	53.95	8.7e-06	K	EFEMSNLQSK	I	Oxidation (M)	0.0002000000.0		Cmpd 8807, AutoMSn(612.9893), 98.9 min (13229323981760106)	13A/AvB	-0.076	16A/AvB	1.376	27A/AvB	-0.002	29A/AvB	0.352	10B/AvB	0.654	21B/AvB	0.013	25B/AvB	-0.002	37B/AvB	0.335	113	23712.7	114	-2764.42	115	49845.9
1	Q9TV62	Myosin-4 OS=Sus scrofa GN=MYH4 PE=2 SV=1	30936	287893	1373	1373	114	114	112425	1	1	0	612.989	1835.95	3	1835.95	-0.0085	0	24.24	0.0053	K	EFEMSNLQSK	I	Oxidation (M)	0.0002000000.0		Cmpd 8736, AutoMSn(612.9894), 98.1 min (13229323981759964)	13A/AvB	-0.12	16A/AvB	1.858	27A/AvB	1.443	29A/AvB	-0.03	10B/AvB	1.118	21B/AvB	-0.098	25B/AvB	-0.02	37B/AvB	0	113	11777.7	114	-1268.17	115	19570.2
1	Q9TV62	Myosin-4 OS=Sus scrofa GN=MYH4 PE=2 SV=1	30936	287893	1373	1373	114	114	112426	1	1	0	612.989	1835.95	3	1835.95	-0.0085	0	27.75	0.0025	K	EFEMSNLQSK	I	Oxidation (M)	0.0002000000.0		Cmpd 8358, AutoMSn(612.9894), 93.1 min (13229323981856070)	13A/AvB	0.274	16A/AvB	0.431	27A/AvB	0.218	29A/AvB	0.168	10B/AvB	0.265	21B/AvB	0.378	25B/AvB	0.134	37B/AvB	0.223	113	35005.4	114	36223.8	115	56916.6
1	Q9TV62	Myosin-4 OS=Sus scrofa GN=MYH4 PE=2 SV=1	30936	287893	1373	1373	114	114	112427	1	1	0	612.99	1835.95	3	1835.95	-0.0078	0	33.26	0.00076	K	EFEMSNLQSK	I	Oxidation (M)	0.0002000000.0		Cmpd 8436, AutoMSn(612.9896), 94.0 min (13229323981856226)	13A/AvB	0.217	16A/AvB	0.253	27A/AvB	0.199	29A/AvB	0.219	10B/AvB	0.278	21B/AvB	0.301	25B/AvB	0.18	37B/AvB	0.241	113	55394.5	114	43102.3	115	50435.4
1	Q9TV62	Myosin-4 OS=Sus scrofa GN=MYH4 PE=2 SV=1	30936	287893	1373	1373	114	114	112428	1	1	0	612.99	1835.95	3	1835.95	-0.0076	0	38.52	0.00024	K	EFEMSNLQSK	I	Oxidation (M)	0.0002000000.0		Cmpd 8798, AutoMSn(612.9897), 98.9 min (13229323981710999)	13A/AvB	0.193	16A/AvB	0.212	27A/AvB	0.202	29A/AvB	0.254	10B/AvB	0.241	21B/AvB	0.309	25B/AvB	0.187	37B/AvB	0.263	113	10429.3	114	8330.16	115	9168.56
1	Q9TV62	Myosin-4 OS=Sus scrofa GN=MYH4 PE=2 SV=1	30936	287893	1373	1373	114	114	112429	1	1	0	612.99	1835.95	3	1835.95	-0.0076	0	30.63	0.0013	K	EFEMSNLQSK	I	Oxidation (M)	0.0002000000.0		Cmpd 8629, AutoMSn(612.9897), 95.3 min (13229323981807951)	13A/AvB	0.235	16A/AvB	0.418	27A/AvB	0.195	29A/AvB	0.195	10B/AvB	0.271	21B/AvB	0.367	25B/AvB	0.168	37B/AvB	0.194	113	29556.9	114	25587.7	115	45583.9
1	Q9TV62	Myosin-4 OS=Sus scrofa GN=MYH4 PE=2 SV=1	30936	287893	1373	1373	114	114	112430	1	1	0	612.99	1835.95	3	1835.95	-0.0074	0	40.54	0.00016	K	EFEMSNLQSK	I	Oxidation (M)	0.0002000000.0		Cmpd 8856, AutoMSn(612.9897), 98.3 min (13229323981546328)	13A/AvB	0.216	16A/AvB	0.241	27A/AvB	0.191	29A/AvB	0.232	10B/AvB	0.208	21B/AvB	0.315	25B/AvB	0.217	37B/AvB	0.261	113	19638.5	114	20396.5	115	22774.5
1	Q9TV62	Myosin-4 OS=Sus scrofa GN=MYH4 PE=2 SV=1	30936	287893	1373	1373	114	114	112431	1	1	0	612.99	1835.95	3	1835.95	-0.0069	0	62.3	1.5e-06	K	EFEMSNLQSK	I	Oxidation (M)	0.0002000000.0		Cmpd 8702, AutoMSn(612.9900), 96.1 min (13229323981808097)	13A/AvB	0.236	16A/AvB	0.262	27A/AvB	0.212	29A/AvB	0.182	10B/AvB	0.242	21B/AvB	0.279	25B/AvB	0.202	37B/AvB	0.276	113	27104.3	114	26409.7	115	29334.1
1	Q9TV62	Myosin-4 OS=Sus scrofa GN=MYH4 PE=2 SV=1	30936	287893	1373	1373	114	114	112432	1	1	0	612.99	1835.95	3	1835.95	-0.0067	0	34.1	0.00063	K	EFEMSNLQSK	I	Oxidation (M)	0.0002000000.0		Cmpd 8788, AutoMSn(612.9900), 97.5 min (13229323981546192)	13A/AvB	0.228	16A/AvB	0.362	27A/AvB	0.19	29A/AvB	0.186	10B/AvB	0.263	21B/AvB	0.361	25B/AvB	0.2	37B/AvB	0.176	113	12445.9	114	10796.1	115	17134.1
1	Q9TV62	Myosin-4 OS=Sus scrofa GN=MYH4 PE=2 SV=1	30936	287893	1373	1373	114	114	112433	1	1	0	612.99	1835.95	3	1835.95	-0.0065	0	22.66	0.0075	K	EFEMSNLQSK	I	Oxidation (M)	0.0002000000.0		Cmpd 8728, AutoMSn(612.9901), 98.1 min (13229323981710859)	13A/AvB	0.268	16A/AvB	0.302	27A/AvB	0.186	29A/AvB	0.101	10B/AvB	0.327	21B/AvB	0.304	25B/AvB	0.19	37B/AvB	0.179	113	6375.34	114	5236.45	115	5895.74
1	Q9TV62	Myosin-4 OS=Sus scrofa GN=MYH4 PE=2 SV=1	30936	287893	1373	1373	114	114	112572	1	1	0	461.546	1842.16	4	1842.17	-0.0138	1	16.18	0.03	K	TKIQLEAK	I				Cmpd 8909, AutoMSn(461.5465), 99.1 min (13229323981857172)	13A/AvB	0.185	16A/AvB	0.275	27A/AvB	0.228	29A/AvB	0.191	10B/AvB	0.237	21B/AvB	0.342	25B/AvB	0.181	37B/AvB	0.24	113	70391.5	114	55045.2	115	81595.8
1	Q9TV62	Myosin-4 OS=Sus scrofa GN=MYH4 PE=2 SV=1	30936	287893	1373	1373	114	114	112750	1	1	0	927.533	1853.05	2	1853.06	-0.0099	0	30.04	0.0015	K	DIDDLELTLAK	V				Cmpd 15495, AutoMSn(927.5327), 173.3 min (13229323981870344)	13A/AvB	0.153	16A/AvB	0.212	27A/AvB	0.199	29A/AvB	0.265	10B/AvB	0.26	21B/AvB	0.299	25B/AvB	0.22	37B/AvB	0.22	113	5390.59	114	3165.85	115	4380.19
1	Q9TV62	Myosin-4 OS=Sus scrofa GN=MYH4 PE=2 SV=1	30936	287893	1373	1373	114	114	112751	1	1	0	927.533	1853.05	2	1853.06	-0.0098	0	16.23	0.03	K	DIDDLELTLAK	V				Cmpd 15725, AutoMSn(927.5327), 176.0 min (13229323981560066)	13A/AvB	0.163	16A/AvB	0.16	27A/AvB	0.211	29A/AvB	0.191	10B/AvB	0.286	21B/AvB	0.245	25B/AvB	0.204	37B/AvB	0.265	113	4338.13	114	2466.16	115	2424.09
1	Q9TV62	Myosin-4 OS=Sus scrofa GN=MYH4 PE=2 SV=1	30936	287893	1373	1373	114	114	112752	1	1	0	618.691	1853.05	3	1853.06	-0.0098	0	29.1	0.0021	K	DIDDLELTLAK	V				Cmpd 15441, AutoMSn(618.6909), 174.6 min (13229323981724285)	13A/AvB	0.05	16A/AvB	0.297	27A/AvB	0.206	29A/AvB	0.182	10B/AvB	0.274	21B/AvB	0.433	25B/AvB	0.146	37B/AvB	0.147	113	1934.61	114	354.132	115	2093.77
1	Q9TV62	Myosin-4 OS=Sus scrofa GN=MYH4 PE=2 SV=1	30936	287893	1373	1373	114	114	112754	1	1	0	618.691	1853.05	3	1853.06	-0.0094	0	43.14	0.00012	K	DIDDLELTLAK	V				Cmpd 15533, AutoMSn(618.6911), 175.5 min (13229323981773558)	13A/AvB	-0.09	16A/AvB	1.348	27A/AvB	-0.027	29A/AvB	0.438	10B/AvB	0.844	21B/AvB	-0.071	25B/AvB	0.002	37B/AvB	0.225	113	12676.5	114	-1348.64	115	20256.8
1	Q9TV62	Myosin-4 OS=Sus scrofa GN=MYH4 PE=2 SV=1	30936	287893	1373	1373	114	114	112755	1	1	0	618.692	1853.05	3	1853.06	-0.0081	0	43.53	0.00011	K	DIDDLELTLAK	V				Cmpd 15666, AutoMSn(618.6915), 174.2 min (13229323981822025)	13A/AvB	0.222	16A/AvB	0.289	27A/AvB	0.254	29A/AvB	0.327	10B/AvB	0.341	21B/AvB	0.242	25B/AvB	0.196	37B/AvB	0.221	113	22154	114	14419.3	115	18810.2
1	Q9TV62	Myosin-4 OS=Sus scrofa GN=MYH4 PE=2 SV=1	30936	287893	1373	1373	114	114	112756	1	1	0	618.692	1853.05	3	1853.06	-0.0081	0	39.46	0.0002	K	DIDDLELTLAK	V				Cmpd 15767, AutoMSn(618.6915), 175.3 min (13229323981822227)	13A/AvB	0.169	16A/AvB	0.29	27A/AvB	0.19	29A/AvB	0.186	10B/AvB	0.339	21B/AvB	0.286	25B/AvB	0.16	37B/AvB	0.216	113	22166.4	114	11070.8	115	18983.7
1	Q9TV62	Myosin-4 OS=Sus scrofa GN=MYH4 PE=2 SV=1	30936	287893	1373	1373	114	114	112757	1	1	0	618.692	1853.05	3	1853.06	-0.0079	0	28.81	0.002	K	DIDDLELTLAK	V				Cmpd 15515, AutoMSn(618.6915), 175.3 min (13229323981773522)	13A/AvB	0.86	16A/AvB	2.378	27A/AvB	2.328	29A/AvB	-0.048	10B/AvB	0.946	21B/AvB	0.101	25B/AvB	-0.047	37B/AvB	0	113	3796.24	114	3450.54	115	9544.61
1	Q9TV62	Myosin-4 OS=Sus scrofa GN=MYH4 PE=2 SV=1	30936	287893	1373	1373	114	114	112758	1	1	0	927.534	1853.05	2	1853.06	-0.0079	0	47.25	3.7e-05	K	DIDDLELTLAK	V				Cmpd 15698, AutoMSn(927.5337), 174.5 min (13229323981822089)	13A/AvB	0.199	16A/AvB	0.232	27A/AvB	0.181	29A/AvB	0.371	10B/AvB	0.314	21B/AvB	0.27	25B/AvB	0.227	37B/AvB	0.189	113	9098.47	114	5771.12	115	6700.8
1	Q9TV62	Myosin-4 OS=Sus scrofa GN=MYH4 PE=2 SV=1	30936	287893	1373	1373	114	114	112760	1	1	0	618.692	1853.05	3	1853.06	-0.0076	0	20.2	0.013	K	DIDDLELTLAK	V				Cmpd 15649, AutoMSn(618.6917), 176.8 min (13229323981773790)	13A/AvB	-0.021	16A/AvB	-0.003	27A/AvB	0.302	29A/AvB	-0.007	10B/AvB	0.83	21B/AvB	0.058	25B/AvB	-0.018	37B/AvB	0.13	113	12386.1	114	-319.028	115	-37.669
1	Q9TV62	Myosin-4 OS=Sus scrofa GN=MYH4 PE=2 SV=1	30936	287893	1373	1373	114	114	112761	1	1	0	618.692	1853.05	3	1853.06	-0.0074	0	36.64	0.00083	K	DIDDLELTLAK	V				Cmpd 15808, AutoMSn(618.6917), 177.0 min (13229323981560232)	13A/AvB	0.141	16A/AvB	0.181	27A/AvB	0.175	29A/AvB	0.244	10B/AvB	0.286	21B/AvB	0.29	25B/AvB	0.191	37B/AvB	0.234	113	7354.26	114	3627.67	115	4657.39
1	Q9TV62	Myosin-4 OS=Sus scrofa GN=MYH4 PE=2 SV=1	30936	287893	1373	1373	114	114	112762	1	1	0	618.692	1853.05	3	1853.06	-0.0072	0	39.8	0.0005	K	DIDDLELTLAK	V				Cmpd 15536, AutoMSn(618.6918), 175.7 min (13229323981724475)	13A/AvB	0.133	16A/AvB	0.366	27A/AvB	0.095	29A/AvB	0.397	10B/AvB	0.468	21B/AvB	0.121	25B/AvB	0.234	37B/AvB	0.177	113	4870.2	114	1387.98	115	3809.65
1	Q9TV62	Myosin-4 OS=Sus scrofa GN=MYH4 PE=2 SV=1	30936	287893	1373	1373	114	114	112764	1	1	0	618.692	1853.05	3	1853.06	-0.0067	0	41.62	0.00027	K	DIDDLELTLAK	V				Cmpd 15480, AutoMSn(618.6919), 173.1 min (13229323981870314)	13A/AvB	0.153	16A/AvB	0.201	27A/AvB	0.2	29A/AvB	0.25	10B/AvB	0.348	21B/AvB	0.228	25B/AvB	0.208	37B/AvB	0.216	113	22587	114	9944.67	115	13043.3
1	Q9TV62	Myosin-4 OS=Sus scrofa GN=MYH4 PE=2 SV=1	30936	287893	1373	1373	114	114	112765	1	1	0	927.534	1853.05	2	1853.06	-0.0066	0	21.35	0.012	K	DIDDLELTLAK	V				Cmpd 15798, AutoMSn(927.5343), 176.8 min (13229323981560212)	13A/AvB	0.176	16A/AvB	0.217	27A/AvB	0.224	29A/AvB	0.221	10B/AvB	0.326	21B/AvB	0.327	25B/AvB	0.162	37B/AvB	0.184	113	5412.53	114	2913.54	115	3589.4
1	Q9TV62	Myosin-4 OS=Sus scrofa GN=MYH4 PE=2 SV=1	30936	287893	1373	1373	114	114	112766	1	1	0	618.692	1853.05	3	1853.06	-0.0065	0	42.22	0.00027	K	DIDDLELTLAK	V				Cmpd 15575, AutoMSn(618.6920), 175.9 min (13229323981773642)	13A/AvB	-0.031	16A/AvB	0.15	27A/AvB	-0.008	29A/AvB	0.206	10B/AvB	0.371	21B/AvB	0.465	25B/AvB	-0.019	37B/AvB	0.184	113	28937.6	114	-2380.71	115	11715.8
1	Q9TV62	Myosin-4 OS=Sus scrofa GN=MYH4 PE=2 SV=1	30936	287893	1373	1373	114	114	112767	1	1	0	618.692	1853.05	3	1853.06	-0.0065	0	40.69	0.0002	K	DIDDLELTLAK	V				Cmpd 15695, AutoMSn(618.6920), 174.5 min (13229323981822083)	13A/AvB	0.178	16A/AvB	0.189	27A/AvB	0.151	29A/AvB	0.285	10B/AvB	0.31	21B/AvB	0.24	25B/AvB	0.188	37B/AvB	0.262	113	71069	114	40870.3	115	43296
1	Q9TV62	Myosin-4 OS=Sus scrofa GN=MYH4 PE=2 SV=1	30936	287893	1373	1373	114	114	112768	1	1	0	618.692	1853.05	3	1853.06	-0.0061	0	43.84	0.00026	K	DIDDLELTLAK	V				Cmpd 15516, AutoMSn(618.6922), 173.5 min (13229323981870386)	13A/AvB	0.158	16A/AvB	0.176	27A/AvB	0.204	29A/AvB	0.276	10B/AvB	0.303	21B/AvB	0.225	25B/AvB	0.212	37B/AvB	0.26	113	47182.7	114	24617.6	115	27380.7
1	Q9TV62	Myosin-4 OS=Sus scrofa GN=MYH4 PE=2 SV=1	30936	287893	1373	1373	114	114	112769	1	1	0	618.692	1853.05	3	1853.06	-0.0059	0	42.27	0.00028	K	DIDDLELTLAK	V				Cmpd 15735, AutoMSn(618.6922), 176.1 min (13229323981560086)	13A/AvB	0.145	16A/AvB	0.196	27A/AvB	0.215	29A/AvB	0.248	10B/AvB	0.365	21B/AvB	0.177	25B/AvB	0.181	37B/AvB	0.277	113	23068.7	114	9158.63	115	12395.8
1	Q9TV62	Myosin-4 OS=Sus scrofa GN=MYH4 PE=2 SV=1	30936	287893	1373	1373	114	114	112770	1	1	0	618.692	1853.06	3	1853.06	-0.0057	0	45.03	0.0002	K	DIDDLELTLAK	V				Cmpd 15464, AutoMSn(618.6923), 174.9 min (13229323981724331)	13A/AvB	0.114	16A/AvB	0.268	27A/AvB	0.147	29A/AvB	0.282	10B/AvB	0.356	21B/AvB	0.172	25B/AvB	0.195	37B/AvB	0.277	113	7701.98	114	2464.67	115	5808.14
1	Q9TV62	Myosin-4 OS=Sus scrofa GN=MYH4 PE=2 SV=1	30936	287893	1373	1373	114	114	112771	1	1	0	618.692	1853.06	3	1853.06	-0.0052	0	37.68	0.00073	K	DIDDLELTLAK	V				Cmpd 15712, AutoMSn(618.6925), 175.9 min (13229323981560040)	13A/AvB	0.178	16A/AvB	0.21	27A/AvB	0.162	29A/AvB	0.161	10B/AvB	0.401	21B/AvB	0.318	25B/AvB	0.127	37B/AvB	0.154	113	9486.82	114	4211.57	115	4978.84
1	Q9TV62	Myosin-4 OS=Sus scrofa GN=MYH4 PE=2 SV=1	30936	287893	1373	1373	114	114	113077	1	1	1	626.342	1876.01	3	1876.01	-0.0089	1	18.45	0.019	R	RANLMQAEIEELR	A				Cmpd 14971, AutoMSn(626.3424), 166.3 min (13229323981820635)	13A/AvB	0.191	16A/AvB	0.306	27A/AvB	0.275	29A/AvB	0.188	10B/AvB	0.355	21B/AvB	0.298	25B/AvB	0.158	37B/AvB	0.188	113	13011.8	114	7011.32	115	11220.9
1	Q9TV62	Myosin-4 OS=Sus scrofa GN=MYH4 PE=2 SV=1	30936	287893	1373	1373	114	114	113080	1	1	1	626.343	1876.01	3	1876.01	-0.0063	1	30.54	0.0014	R	RANLMQAEIEELR	A				Cmpd 15047, AutoMSn(626.3433), 169.9 min (13229323981772586)	13A/AvB	-0.035	16A/AvB	0.237	27A/AvB	0.413	29A/AvB	0.062	10B/AvB	0.413	21B/AvB	0.45	25B/AvB	-0.04	37B/AvB	0.177	113	4970.39	114	-425.818	115	2848.47
1	Q9TV62	Myosin-4 OS=Sus scrofa GN=MYH4 PE=2 SV=1	30936	287893	1373	1373	114	114	113081	1	1	1	626.343	1876.01	3	1876.01	-0.0058	1	35.28	0.00049	R	RANLMQAEIEELR	A				Cmpd 14977, AutoMSn(626.3434), 169.1 min (13229323981772446)	13A/AvB	-0.072	16A/AvB	1.088	27A/AvB	0.635	29A/AvB	-0.014	10B/AvB	0.679	21B/AvB	-0.056	25B/AvB	-0.031	37B/AvB	0.408	113	5564.3	114	-592.479	115	8916.23
1	Q9TV62	Myosin-4 OS=Sus scrofa GN=MYH4 PE=2 SV=1	30936	287893	1373	1373	114	114	113083	1	1	1	626.344	1876.01	3	1876.01	-0.005	1	19.06	0.016	R	RANLMQAEIEELR	A				Cmpd 14985, AutoMSn(626.3437), 169.4 min (13229323981723373)	13A/AvB	0.124	16A/AvB	0.254	27A/AvB	0.282	29A/AvB	0.276	10B/AvB	0.328	21B/AvB	0.501	25B/AvB	0.051	37B/AvB	0.119	113	1563.98	114	588.675	115	1211.39
1	Q9TV62	Myosin-4 OS=Sus scrofa GN=MYH4 PE=2 SV=1	30936	287893	1373	1373	114	114	113084	1	1	1	626.344	1876.01	3	1876.01	-0.005	1	20.33	0.012	R	RANLMQAEIEELR	A				Cmpd 14911, AutoMSn(626.3437), 168.6 min (13229323981723225)	13A/AvB	0.179	16A/AvB	0.206	27A/AvB	0.211	29A/AvB	0.218	10B/AvB	0.199	21B/AvB	0.498	25B/AvB	0.14	37B/AvB	0.163	113	1683.79	114	1517.45	115	1742.66
1	Q9TV62	Myosin-4 OS=Sus scrofa GN=MYH4 PE=2 SV=1	30936	287893	1373	1373	114	114	113086	1	1	1	626.344	1876.01	3	1876.01	-0.0047	1	29.68	0.0016	R	RANLMQAEIEELR	A				Cmpd 15171, AutoMSn(626.3438), 169.7 min (13229323981558958)	13A/AvB	0.253	16A/AvB	0.261	27A/AvB	0.203	29A/AvB	0.101	10B/AvB	0.252	21B/AvB	0.415	25B/AvB	0.2	37B/AvB	0.134	113	4498.33	114	4510.28	115	4654.46
1	Q9TV62	Myosin-4 OS=Sus scrofa GN=MYH4 PE=2 SV=1	30936	287893	1373	1373	114	114	113088	1	1	1	626.344	1876.01	3	1876.01	-0.0039	1	75.13	2.8e-07	R	RANLMQAEIEELR	A				Cmpd 14826, AutoMSn(626.3441), 164.7 min (13229323981820345)	13A/AvB	0.189	16A/AvB	0.291	27A/AvB	0.236	29A/AvB	0.187	10B/AvB	0.341	21B/AvB	0.303	25B/AvB	0.126	37B/AvB	0.229	113	15868.9	114	8780.86	115	13533.6
1	Q9TV62	Myosin-4 OS=Sus scrofa GN=MYH4 PE=2 SV=1	30936	287893	1373	1373	114	114	113089	1	1	1	626.344	1876.01	3	1876.01	-0.0039	1	54.1	8.5e-06	R	RANLMQAEIEELR	A				Cmpd 14897, AutoMSn(626.3440), 165.5 min (13229323981820487)	13A/AvB	0.233	16A/AvB	0.236	27A/AvB	0.221	29A/AvB	0.24	10B/AvB	0.331	21B/AvB	0.362	25B/AvB	0.126	37B/AvB	0.181	113	17106.3	114	12066.4	115	12214.7
1	Q9TV62	Myosin-4 OS=Sus scrofa GN=MYH4 PE=2 SV=1	30936	287893	1373	1373	114	114	113090	1	1	1	626.344	1876.01	3	1876.01	-0.0036	1	41.68	0.00041	R	RANLMQAEIEELR	A				Cmpd 15099, AutoMSn(626.3442), 168.9 min (13229323981558814)	13A/AvB	0.219	16A/AvB	0.274	27A/AvB	0.244	29A/AvB	0.248	10B/AvB	0.263	21B/AvB	0.366	25B/AvB	0.185	37B/AvB	0.186	113	4922.46	114	4097.37	115	5121.72
1	Q9TV62	Myosin-4 OS=Sus scrofa GN=MYH4 PE=2 SV=1	30936	287893	1373	1373	114	114	113092	1	1	1	626.345	1876.01	3	1876.01	-0.0026	1	31.07	0.0028	R	RANLMQAEIEELR	A				Cmpd 14913, AutoMSn(626.3445), 168.6 min (13229323981723229)	13A/AvB	0.476	16A/AvB	0.144	27A/AvB	0.416	29A/AvB	0.223	10B/AvB	0.336	21B/AvB	0.425	25B/AvB	0.111	37B/AvB	0.129	113	1450.06	114	2056.34	115	622.011
1	Q9TV62	Myosin-4 OS=Sus scrofa GN=MYH4 PE=2 SV=1	30936	287893	1373	1373	114	114	113093	1	1	1	626.345	1876.01	3	1876.01	-0.0025	1	50.41	6.1e-05	R	RANLMQAEIEELR	A				Cmpd 15028, AutoMSn(626.3445), 168.1 min (13229323981558672)	13A/AvB	0.244	16A/AvB	0.352	27A/AvB	0.194	29A/AvB	0.136	10B/AvB	0.291	21B/AvB	0.468	25B/AvB	0.117	37B/AvB	0.124	113	5197.7	114	4350.38	115	6278.04
1	Q9TV62	Myosin-4 OS=Sus scrofa GN=MYH4 PE=2 SV=1	30936	287893	1373	1373	114	114	113095	1	1	1	626.345	1876.01	3	1876.01	-0.0017	1	29.36	0.0025	R	RANLMQAEIEELR	A				Cmpd 14364, AutoMSn(626.3448), 160.4 min (13229323981868082)	13A/AvB	0.261	16A/AvB	0.365	27A/AvB	0.19	29A/AvB	0.214	10B/AvB	0.35	21B/AvB	0.376	25B/AvB	0.123	37B/AvB	0.151	113	13626	114	10165.6	115	14211.3
1	Q9TV62	Myosin-4 OS=Sus scrofa GN=MYH4 PE=2 SV=1	30936	287893	1373	1373	114	114	113124	1	1	1	627.999	1880.97	3	1880.98	-0.0084	0	33.17	0.00077	R	VVESMQSTLDAEIR	S				Cmpd 16967, AutoMSn(627.9985), 190.2 min (13229323981562550)	13A/AvB	0.225	16A/AvB	0.349	27A/AvB	0.409	29A/AvB	0.315	10B/AvB	0.353	21B/AvB	0.353	25B/AvB	0.072	37B/AvB	0.221	113	3380.84	114	2150.85	115	3338.88
1	Q9TV62	Myosin-4 OS=Sus scrofa GN=MYH4 PE=2 SV=1	30936	287893	1373	1373	114	114	113127	1	1	1	627.999	1880.98	3	1880.98	-0.0064	0	25.5	0.0041	R	VVESMQSTLDAEIR	S				Cmpd 16850, AutoMSn(627.9991), 188.7 min (13229323981873054)	13A/AvB	0.166	16A/AvB	0.225	27A/AvB	0.222	29A/AvB	0.236	10B/AvB	0.39	21B/AvB	0.267	25B/AvB	0.14	37B/AvB	0.203	113	9865.88	114	4207.85	115	5688.52
1	Q9TV62	Myosin-4 OS=Sus scrofa GN=MYH4 PE=2 SV=1	30936	287893	1373	1373	114	114	113128	1	1	1	941.495	1880.98	2	1880.98	-0.0063	0	14.32	0.045	R	VVESMQSTLDAEIR	S				Cmpd 16774, AutoMSn(941.4951), 189.8 min (13229323981726951)	13A/AvB	0.209	16A/AvB	0.428	27A/AvB	0.275	29A/AvB	0.25	10B/AvB	0.305	21B/AvB	0.24	25B/AvB	0.071	37B/AvB	0.384	113	1388.03	114	950.226	115	1949.7
1	Q9TV62	Myosin-4 OS=Sus scrofa GN=MYH4 PE=2 SV=1	30936	287893	1373	1373	114	114	113130	1	1	1	941.495	1880.98	2	1880.98	-0.0057	0	29.92	0.0016	R	VVESMQSTLDAEIR	S				Cmpd 16876, AutoMSn(941.4955), 187.9 min (13229323981824445)	13A/AvB	0.226	16A/AvB	0.221	27A/AvB	0.245	29A/AvB	0.227	10B/AvB	0.271	21B/AvB	0.351	25B/AvB	0.113	37B/AvB	0.265	113	6141.66	114	5131.86	115	5011.28
1	Q9TV62	Myosin-4 OS=Sus scrofa GN=MYH4 PE=2 SV=1	30936	287893	1373	1373	114	114	113131	1	1	1	628	1880.98	3	1880.98	-0.0055	0	36.89	0.00035	R	VVESMQSTLDAEIR	S				Cmpd 17037, AutoMSn(627.9994), 191.0 min (13229323981562690)	13A/AvB	0.149	16A/AvB	0.299	27A/AvB	0.066	29A/AvB	0.127	10B/AvB	0.224	21B/AvB	0.409	25B/AvB	0.181	37B/AvB	0.186	113	2962.73	114	1969.58	115	3944.49
1	Q9TV62	Myosin-4 OS=Sus scrofa GN=MYH4 PE=2 SV=1	30936	287893	1373	1373	114	114	113132	1	1	1	628	1880.98	3	1880.98	-0.0055	0	51.2	1.6e-05	R	VVESMQSTLDAEIR	S				Cmpd 16779, AutoMSn(627.9994), 187.9 min (13229323981872912)	13A/AvB	0.184	16A/AvB	0.235	27A/AvB	0.16	29A/AvB	0.276	10B/AvB	0.294	21B/AvB	0.294	25B/AvB	0.159	37B/AvB	0.253	113	7393.74	114	4621.08	115	5902.66
1	Q9TV62	Myosin-4 OS=Sus scrofa GN=MYH4 PE=2 SV=1	30936	287893	1373	1373	114	114	113134	1	1	1	628	1880.98	3	1880.98	-0.0053	0	62.71	1.3e-06	R	VVESMQSTLDAEIR	S				Cmpd 16907, AutoMSn(627.9995), 188.3 min (13229323981824507)	13A/AvB	0.247	16A/AvB	0.187	27A/AvB	0.276	29A/AvB	0.346	10B/AvB	0.308	21B/AvB	0.347	25B/AvB	0.116	37B/AvB	0.229	113	10392.9	114	8311.06	115	6310.77
1	Q9TV62	Myosin-4 OS=Sus scrofa GN=MYH4 PE=2 SV=1	30936	287893	1373	1373	114	114	113136	1	1	1	628	1880.98	3	1880.98	-0.0048	0	27.62	0.0026	R	VVESMQSTLDAEIR	S				Cmpd 17053, AutoMSn(627.9997), 189.9 min (13229323981824799)	13A/AvB	0.284	16A/AvB	0.281	27A/AvB	0.277	29A/AvB	0.264	10B/AvB	0.406	21B/AvB	0.236	25B/AvB	0.18	37B/AvB	0.178	113	10461.1	114	7313.08	115	7237.38
1	Q9TV62	Myosin-4 OS=Sus scrofa GN=MYH4 PE=2 SV=1	30936	287893	1373	1373	114	114	113138	1	1	1	941.496	1880.98	2	1880.98	-0.0047	0	61.97	1.5e-06	R	VVESMQSTLDAEIR	S				Cmpd 16947, AutoMSn(941.4959), 188.7 min (13229323981824587)	13A/AvB	0.236	16A/AvB	0.361	27A/AvB	0.224	29A/AvB	0.264	10B/AvB	0.306	21B/AvB	0.341	25B/AvB	0.104	37B/AvB	0.249	113	8966.53	114	6892.28	115	10552.6
1	Q9TV62	Myosin-4 OS=Sus scrofa GN=MYH4 PE=2 SV=1	30936	287893	1373	1373	114	114	113140	1	1	1	628	1880.98	3	1880.98	-0.0046	0	44.35	6.9e-05	R	VVESMQSTLDAEIR	S				Cmpd 16705, AutoMSn(627.9997), 187.1 min (13229323981872764)	13A/AvB	0.185	16A/AvB	0.246	27A/AvB	0.301	29A/AvB	0.179	10B/AvB	0.427	21B/AvB	0.294	25B/AvB	0.108	37B/AvB	0.172	113	10896.6	114	4715.17	115	6282.91
1	Q9TV62	Myosin-4 OS=Sus scrofa GN=MYH4 PE=2 SV=1	30936	287893	1373	1373	114	114	113141	1	1	1	941.496	1880.98	2	1880.98	-0.0044	0	60.94	1.9e-06	R	VVESMQSTLDAEIR	S				Cmpd 16752, AutoMSn(941.4961), 187.6 min (13229323981872858)	13A/AvB	0.22	16A/AvB	0.182	27A/AvB	0.213	29A/AvB	0.218	10B/AvB	0.29	21B/AvB	0.333	25B/AvB	0.174	37B/AvB	0.202	113	8334.96	114	6311.21	115	5228.49
1	Q9TV62	Myosin-4 OS=Sus scrofa GN=MYH4 PE=2 SV=1	30936	287893	1373	1373	114	114	113142	1	1	1	628	1880.98	3	1880.98	-0.004	0	33.56	0.00071	R	VVESMQSTLDAEIR	S				Cmpd 16923, AutoMSn(627.9999), 191.3 min (13229323981776338)	13A/AvB	-0.044	16A/AvB	-0.012	27A/AvB	0.55	29A/AvB	-0.011	10B/AvB	0.599	21B/AvB	0.448	25B/AvB	-0.046	37B/AvB	0	113	4806	114	-354.064	115	-98.6013
1	Q9TV62	Myosin-4 OS=Sus scrofa GN=MYH4 PE=2 SV=1	30936	287893	1373	1373	114	114	113144	1	1	1	941.496	1880.98	2	1880.98	-0.0038	0	40.56	0.00016	R	VVESMQSTLDAEIR	S				Cmpd 16824, AutoMSn(941.4964), 188.4 min (13229323981873002)	13A/AvB	0.106	16A/AvB	0.208	27A/AvB	0.258	29A/AvB	0.16	10B/AvB	0.245	21B/AvB	0.278	25B/AvB	0.146	37B/AvB	0.332	113	5741.9	114	2499.48	115	4886.71
1	Q9TV62	Myosin-4 OS=Sus scrofa GN=MYH4 PE=2 SV=1	30936	287893	1373	1373	114	114	113145	1	1	1	628	1880.98	3	1880.98	-0.0037	0	28.04	0.0023	R	VVESMQSTLDAEIR	S				Cmpd 17110, AutoMSn(628.0001), 191.8 min (13229323981562836)	13A/AvB	0.191	16A/AvB	0.303	27A/AvB	0.159	29A/AvB	0.363	10B/AvB	0.356	21B/AvB	0.252	25B/AvB	0.098	37B/AvB	0.294	113	2201.86	114	1183.9	115	1875.67
1	Q9TV62	Myosin-4 OS=Sus scrofa GN=MYH4 PE=2 SV=1	30936	287893	1373	1373	114	114	113146	1	1	1	941.497	1880.98	2	1880.98	-0.0034	0	16.04	0.031	R	VVESMQSTLDAEIR	S				Cmpd 17056, AutoMSn(941.4966), 191.2 min (13229323981562728)	13A/AvB	0.099	16A/AvB	0.239	27A/AvB	0.195	29A/AvB	0.228	10B/AvB	0.223	21B/AvB	0.409	25B/AvB	0.1	37B/AvB	0.268	113	4733.87	114	2090.92	115	5068.15
1	Q9TV62	Myosin-4 OS=Sus scrofa GN=MYH4 PE=2 SV=1	30936	287893	1373	1373	114	114	113147	1	1	1	941.497	1880.98	2	1880.98	-0.0032	0	43.6	8.2e-05	R	VVESMQSTLDAEIR	S				Cmpd 16984, AutoMSn(941.4967), 190.4 min (13229323981562584)	13A/AvB	0.19	16A/AvB	0.353	27A/AvB	0.189	29A/AvB	0.286	10B/AvB	0.223	21B/AvB	0.356	25B/AvB	0.194	37B/AvB	0.227	113	4187.07	114	3560.43	115	6612.46
1	Q9TV62	Myosin-4 OS=Sus scrofa GN=MYH4 PE=2 SV=1	30936	287893	1373	1373	114	114	113148	1	1	1	941.497	1880.98	2	1880.98	-0.0032	0	33.43	0.00073	R	VVESMQSTLDAEIR	S				Cmpd 17017, AutoMSn(941.4967), 189.5 min (13229323981824727)	13A/AvB	0.186	16A/AvB	0.261	27A/AvB	0.178	29A/AvB	0.141	10B/AvB	0.223	21B/AvB	0.345	25B/AvB	0.226	37B/AvB	0.207	113	6425.52	114	5384.72	115	7526.06
1	Q9TV62	Myosin-4 OS=Sus scrofa GN=MYH4 PE=2 SV=1	30936	287893	1373	1373	114	114	113151	1	1	1	628	1880.98	3	1880.98	-0.0029	0	63.43	3e-06	R	VVESMQSTLDAEIR	S				Cmpd 16981, AutoMSn(628.0003), 189.1 min (13229323981824655)	13A/AvB	0.227	16A/AvB	0.227	27A/AvB	0.203	29A/AvB	0.223	10B/AvB	0.328	21B/AvB	0.312	25B/AvB	0.141	37B/AvB	0.218	113	9991.53	114	6900.69	115	6911.82
1	Q9TV62	Myosin-4 OS=Sus scrofa GN=MYH4 PE=2 SV=1	30936	287893	1373	1373	114	114	113152	1	1	1	941.497	1880.98	2	1880.98	-0.0029	0	18.91	0.017	R	VVESMQSTLDAEIR	S				Cmpd 16808, AutoMSn(941.4968), 190.0 min (13229323981776108)	13A/AvB	-0.043	16A/AvB	0.605	27A/AvB	0.544	29A/AvB	-0.012	10B/AvB	0.413	21B/AvB	-0.041	25B/AvB	0.215	37B/AvB	0.412	113	3742.49	114	-387.919	115	5473.79
1	Q9TV62	Myosin-4 OS=Sus scrofa GN=MYH4 PE=2 SV=1	30936	287893	1373	1373	114	114	113153	1	1	1	628	1880.98	3	1880.98	-0.0026	0	46.23	4.6e-05	R	VVESMQSTLDAEIR	S				Cmpd 16844, AutoMSn(628.0004), 190.4 min (13229323981776180)	13A/AvB	0.446	16A/AvB	-0.045	27A/AvB	0.546	29A/AvB	-0.012	10B/AvB	0.303	21B/AvB	0.534	25B/AvB	-0.05	37B/AvB	0.213	113	2058.25	114	3032.21	115	-307.007
1	Q9TV62	Myosin-4 OS=Sus scrofa GN=MYH4 PE=2 SV=1	30936	287893	1373	1373	114	114	113154	1	1	1	628	1880.98	3	1880.98	-0.0026	0	39.38	0.0002	R	VVESMQSTLDAEIR	S				Cmpd 16770, AutoMSn(628.0004), 189.6 min (13229323981776032)	13A/AvB	-0.042	16A/AvB	0.158	27A/AvB	0.173	29A/AvB	0.231	10B/AvB	0.527	21B/AvB	0.337	25B/AvB	-0.023	37B/AvB	0.159	113	5095.12	114	-408.438	115	1531.57
1	Q9TV62	Myosin-4 OS=Sus scrofa GN=MYH4 PE=2 SV=1	30936	287893	1373	1373	114	114	113156	1	1	1	941.498	1880.98	2	1880.98	-0.0012	0	24.77	0.0048	R	VVESMQSTLDAEIR	S				Cmpd 16685, AutoMSn(941.4977), 186.8 min (13229323981872724)	13A/AvB	0.271	16A/AvB	0.208	27A/AvB	0.256	29A/AvB	0.209	10B/AvB	0.223	21B/AvB	0.325	25B/AvB	0.256	37B/AvB	0.196	113	3091.09	114	3755.83	115	2877.78
1	Q9TV62	Myosin-4 OS=Sus scrofa GN=MYH4 PE=2 SV=1	30936	287893	1373	1373	114	114	113260	1	1	1	631.675	1892	3	1892.01	-0.0055	1	14.1	0.048	R	RANLMQAEIEELR	A	Oxidation (M)	0.0000200000000.0		Cmpd 11388, AutoMSn(631.6752), 128.2 min (13229323981765268)	13A/AvB	-0.024	16A/AvB	0.235	27A/AvB	0.011	29A/AvB	0.213	10B/AvB	0.254	21B/AvB	0.569	25B/AvB	-0.025	37B/AvB	0.201	113	5578.62	114	-517.443	115	5151.85
1	Q9TV62	Myosin-4 OS=Sus scrofa GN=MYH4 PE=2 SV=1	30936	287893	1373	1373	114	114	113261	1	1	1	631.675	1892	3	1892.01	-0.005	1	34.06	0.00064	R	RANLMQAEIEELR	A	Oxidation (M)	0.0000200000000.0		Cmpd 11171, AutoMSn(631.6754), 125.8 min (13229323981764834)	13A/AvB	-0.069	16A/AvB	0.941	27A/AvB	0.501	29A/AvB	-0.011	10B/AvB	0.676	21B/AvB	0.056	25B/AvB	-0.029	37B/AvB	0.296	113	11537.7	114	-1179.53	115	16064.3
1	Q9TV62	Myosin-4 OS=Sus scrofa GN=MYH4 PE=2 SV=1	30936	287893	1373	1373	114	114	113263	1	1	1	631.675	1892	3	1892.01	-0.0048	1	30.02	0.0015	R	RANLMQAEIEELR	A	Oxidation (M)	0.0000200000000.0		Cmpd 11288, AutoMSn(631.6754), 127.3 min (13229323981715979)	13A/AvB	0.125	16A/AvB	0.269	27A/AvB	0.136	29A/AvB	0.17	10B/AvB	0.252	21B/AvB	0.373	25B/AvB	0.158	37B/AvB	0.217	113	5551.85	114	2765.5	115	5933.97
1	Q9TV62	Myosin-4 OS=Sus scrofa GN=MYH4 PE=2 SV=1	30936	287893	1373	1373	114	114	113264	1	1	1	631.676	1892.01	3	1892.01	-0.0042	1	33.24	0.00076	R	RANLMQAEIEELR	A	Oxidation (M)	0.0000200000000.0		Cmpd 11315, AutoMSn(631.6756), 127.4 min (13229323981765122)	13A/AvB	1.545	16A/AvB	0.24	27A/AvB	0.933	29A/AvB	0.009	10B/AvB	0.445	21B/AvB	0.093	25B/AvB	-0.051	37B/AvB	0.514	113	6068.47	114	21086.4	115	3271.01
1	Q9TV62	Myosin-4 OS=Sus scrofa GN=MYH4 PE=2 SV=1	30936	287893	1373	1373	114	114	113267	1	1	1	631.676	1892.01	3	1892.01	-0.004	1	45.48	5.4e-05	R	RANLMQAEIEELR	A	Oxidation (M)	0.0000200000000.0		Cmpd 11144, AutoMSn(631.6756), 125.6 min (13229323981715691)	13A/AvB	0.218	16A/AvB	0.235	27A/AvB	0.16	29A/AvB	0.152	10B/AvB	0.249	21B/AvB	0.37	25B/AvB	0.079	37B/AvB	0.302	113	3714.33	114	3245.33	115	3506.58
1	Q9TV62	Myosin-4 OS=Sus scrofa GN=MYH4 PE=2 SV=1	30936	287893	1373	1373	114	114	113270	1	1	1	631.676	1892.01	3	1892.01	-0.0039	1	47.03	3.9e-05	R	RANLMQAEIEELR	A	Oxidation (M)	0.0000200000000.0		Cmpd 11243, AutoMSn(631.6757), 126.6 min (13229323981764978)	13A/AvB	-0.061	16A/AvB	0.085	27A/AvB	0.101	29A/AvB	0.126	10B/AvB	0.8	21B/AvB	0.052	25B/AvB	-0.008	37B/AvB	0.155	113	41319.7	114	-3149.77	115	4380.97
1	Q9TV62	Myosin-4 OS=Sus scrofa GN=MYH4 PE=2 SV=1	30936	287893	1373	1373	114	114	113271	1	1	1	631.676	1892.01	3	1892.01	-0.0039	1	32.14	0.00097	R	RANLMQAEIEELR	A	Oxidation (M)	0.0000200000000.0		Cmpd 11264, AutoMSn(631.6757), 125.4 min (13229323981551144)	13A/AvB	0.233	16A/AvB	0.294	27A/AvB	0.248	29A/AvB	0.182	10B/AvB	0.329	21B/AvB	0.364	25B/AvB	0.088	37B/AvB	0.219	113	13359.6	114	9459.77	115	11911.3
1	Q9TV62	Myosin-4 OS=Sus scrofa GN=MYH4 PE=2 SV=1	30936	287893	1373	1373	114	114	113272	1	1	1	631.676	1892.01	3	1892.01	-0.0039	1	35.15	0.00051	R	RANLMQAEIEELR	A	Oxidation (M)	0.0000200000000.0		Cmpd 10517, AutoMSn(631.6757), 117.0 min (13229323981860388)	13A/AvB	0.241	16A/AvB	0.324	27A/AvB	0.195	29A/AvB	0.148	10B/AvB	0.254	21B/AvB	0.395	25B/AvB	0.143	37B/AvB	0.208	113	26695.6	114	25301.9	115	34037.6
1	Q9TV62	Myosin-4 OS=Sus scrofa GN=MYH4 PE=2 SV=1	30936	287893	1373	1373	114	114	113275	1	1	1	631.676	1892.01	3	1892.01	-0.0035	1	51.74	1.4e-05	R	RANLMQAEIEELR	A	Oxidation (M)	0.0000200000000.0		Cmpd 10833, AutoMSn(631.6759), 119.8 min (13229323981812359)	13A/AvB	0.247	16A/AvB	0.412	27A/AvB	0.232	29A/AvB	0.187	10B/AvB	0.291	21B/AvB	0.365	25B/AvB	0.142	37B/AvB	0.202	113	26899.1	114	22849.7	115	38106.6
1	Q9TV62	Myosin-4 OS=Sus scrofa GN=MYH4 PE=2 SV=1	30936	287893	1373	1373	114	114	113276	1	1	1	631.676	1892.01	3	1892.01	-0.0035	1	30.65	0.0013	R	RANLMQAEIEELR	A	Oxidation (M)	0.0000200000000.0		Cmpd 10373, AutoMSn(631.6758), 115.4 min (13229323981860100)	13A/AvB	0.185	16A/AvB	0.272	27A/AvB	0.229	29A/AvB	0.186	10B/AvB	0.229	21B/AvB	0.323	25B/AvB	0.179	37B/AvB	0.269	113	46609.7	114	37612.7	115	55254.5
1	Q9TV62	Myosin-4 OS=Sus scrofa GN=MYH4 PE=2 SV=1	30936	287893	1373	1373	114	114	113277	1	1	1	631.676	1892.01	3	1892.01	-0.0033	1	38.03	0.00027	R	RANLMQAEIEELR	A	Oxidation (M)	0.0000200000000.0		Cmpd 11216, AutoMSn(631.6759), 126.5 min (13229323981715835)	13A/AvB	0.181	16A/AvB	0.306	27A/AvB	0.244	29A/AvB	0.24	10B/AvB	0.3	21B/AvB	0.294	25B/AvB	0.136	37B/AvB	0.27	113	6477.05	114	3911.51	115	6597.21
1	Q9TV62	Myosin-4 OS=Sus scrofa GN=MYH4 PE=2 SV=1	30936	287893	1373	1373	114	114	113278	1	1	1	631.676	1892.01	3	1892.01	-0.0031	1	46.06	4.8e-05	R	RANLMQAEIEELR	A	Oxidation (M)	0.0000200000000.0		Cmpd 10979, AutoMSn(631.6759), 121.4 min (13229323981812651)	13A/AvB	0.184	16A/AvB	0.329	27A/AvB	0.217	29A/AvB	0.209	10B/AvB	0.264	21B/AvB	0.386	25B/AvB	0.139	37B/AvB	0.212	113	15140	114	10582	115	18912.9
1	Q9TV62	Myosin-4 OS=Sus scrofa GN=MYH4 PE=2 SV=1	30936	287893	1373	1373	114	114	113280	1	1	1	631.676	1892.01	3	1892.01	-0.0029	1	35.61	0.00046	R	RANLMQAEIEELR	A	Oxidation (M)	0.0000200000000.0		Cmpd 11120, AutoMSn(631.6760), 123.8 min (13229323981550856)	13A/AvB	0.272	16A/AvB	0.327	27A/AvB	0.193	29A/AvB	0.191	10B/AvB	0.256	21B/AvB	0.435	25B/AvB	0.132	37B/AvB	0.177	113	11206.9	114	11934.1	115	14316.7
1	Q9TV62	Myosin-4 OS=Sus scrofa GN=MYH4 PE=2 SV=1	30936	287893	1373	1373	114	114	113281	1	1	1	631.676	1892.01	3	1892.01	-0.0028	1	49.18	2.4e-05	R	RANLMQAEIEELR	A	Oxidation (M)	0.0000200000000.0		Cmpd 10445, AutoMSn(631.6761), 116.2 min (13229323981860244)	13A/AvB	0.213	16A/AvB	0.263	27A/AvB	0.209	29A/AvB	0.209	10B/AvB	0.281	21B/AvB	0.361	25B/AvB	0.13	37B/AvB	0.228	113	52642	114	39932.2	115	49254
1	Q9TV62	Myosin-4 OS=Sus scrofa GN=MYH4 PE=2 SV=1	30936	287893	1373	1373	114	114	113283	1	1	1	631.676	1892.01	3	1892.01	-0.0024	1	50.57	1.8e-05	R	RANLMQAEIEELR	A	Oxidation (M)	0.0000200000000.0		Cmpd 11192, AutoMSn(631.6762), 124.6 min (13229323981551000)	13A/AvB	0.162	16A/AvB	0.315	27A/AvB	0.231	29A/AvB	0.175	10B/AvB	0.218	21B/AvB	0.462	25B/AvB	0.128	37B/AvB	0.192	113	14363.8	114	10677.2	115	20774.7
1	Q9TV62	Myosin-4 OS=Sus scrofa GN=MYH4 PE=2 SV=1	30936	287893	1373	1373	114	114	113284	1	1	1	631.676	1892.01	3	1892.01	-0.0022	1	45.47	5.4e-05	R	RANLMQAEIEELR	A	Oxidation (M)	0.0000200000000.0		Cmpd 11212, AutoMSn(631.6763), 124.8 min (13229323981551040)	13A/AvB	0.253	16A/AvB	0.335	27A/AvB	0.228	29A/AvB	0.194	10B/AvB	0.237	21B/AvB	0.374	25B/AvB	0.142	37B/AvB	0.248	113	9333.6	114	9987.62	115	13214.4
1	Q9TV62	Myosin-4 OS=Sus scrofa GN=MYH4 PE=2 SV=1	30936	287893	1373	1373	114	114	113285	1	1	1	631.677	1892.01	3	1892.01	-0.0017	1	47.34	3.6e-05	R	RANLMQAEIEELR	A	Oxidation (M)	0.0000200000000.0		Cmpd 10905, AutoMSn(631.6764), 120.6 min (13229323981812503)	13A/AvB	0.209	16A/AvB	0.298	27A/AvB	0.155	29A/AvB	0.18	10B/AvB	0.224	21B/AvB	0.418	25B/AvB	0.145	37B/AvB	0.213	113	24749.3	114	23124.5	115	32926.1
1	Q9TV62	Myosin-4 OS=Sus scrofa GN=MYH4 PE=2 SV=1	30936	287893	1373	1373	114	114	113410	1	1	1	633.327	1896.96	3	1896.98	-0.0188	0	25.17	0.0044	R	VVESMQSTLDAEIR	S	Oxidation (M)	0.00002000000000.0		Cmpd 11617, AutoMSn(633.3267), 129.4 min (13229323981862588)	13A/AvB	0.154	16A/AvB	0.29	27A/AvB	0.169	29A/AvB	0.123	10B/AvB	0.497	21B/AvB	0.247	25B/AvB	0.117	37B/AvB	0.138	113	27210.9	114	8426.58	115	15874.7
1	Q9TV62	Myosin-4 OS=Sus scrofa GN=MYH4 PE=2 SV=1	30936	287893	1373	1373	114	114	113441	1	1	1	633.331	1896.97	3	1896.98	-0.0067	0	39.83	0.00018	R	VVESMQSTLDAEIR	S	Oxidation (M)	0.00002000000000.0		Cmpd 22401, AutoMSn(633.3307), 251.7 min (13229323981884156)	13A/AvB	0.196	16A/AvB	0.188	27A/AvB	0.205	29A/AvB	0.197	10B/AvB	0.313	21B/AvB	0.421	25B/AvB	0.114	37B/AvB	0.152	113	7956.48	114	4980.65	115	4776.14
1	Q9TV62	Myosin-4 OS=Sus scrofa GN=MYH4 PE=2 SV=1	30936	287893	1373	1373	114	114	113448	1	1	1	949.493	1896.97	2	1896.98	-0.0056	0	18.02	0.02	R	VVESMQSTLDAEIR	S	Oxidation (M)	0.00002000000000.0		Cmpd 11617, AutoMSn(949.4929), 130.8 min (13229323981765726)	13A/AvB	2.022	16A/AvB	-0.129	27A/AvB	1.301	29A/AvB	-0.029	10B/AvB	0.349	21B/AvB	0.005	25B/AvB	-0.066	37B/AvB	0.712	113	1163.63	114	6737.54	115	-430.219
1	Q9TV62	Myosin-4 OS=Sus scrofa GN=MYH4 PE=2 SV=1	30936	287893	1373	1373	114	114	113449	1	1	1	633.331	1896.97	3	1896.98	-0.0056	0	25.67	0.0039	R	VVESMQSTLDAEIR	S	Oxidation (M)	0.00002000000000.0		Cmpd 11461, AutoMSn(633.3311), 126.8 min (13229323981813615)	13A/AvB	0.192	16A/AvB	0.331	27A/AvB	0.291	29A/AvB	0.247	10B/AvB	0.387	21B/AvB	0.251	25B/AvB	0.175	37B/AvB	0.186	113	24138.5	114	11977.2	115	20641.3
1	Q9TV62	Myosin-4 OS=Sus scrofa GN=MYH4 PE=2 SV=1	30936	287893	1373	1373	114	114	113453	1	1	1	633.331	1896.97	3	1896.98	-0.0054	0	22.13	0.0084	R	VVESMQSTLDAEIR	S	Oxidation (M)	0.00002000000000.0		Cmpd 23476, AutoMSn(633.3311), 263.7 min (13229323981886306)	13A/AvB	0.276	16A/AvB	0.375	27A/AvB	0.26	29A/AvB	0.32	10B/AvB	0.282	21B/AvB	0.317	25B/AvB	0.095	37B/AvB	0.306	113	2695.39	114	2637.57	115	3582.41
1	Q9TV62	Myosin-4 OS=Sus scrofa GN=MYH4 PE=2 SV=1	30936	287893	1373	1373	114	114	113456	1	1	1	949.493	1896.97	2	1896.98	-0.0052	0	57.22	4.3e-06	R	VVESMQSTLDAEIR	S	Oxidation (M)	0.00002000000000.0		Cmpd 11640, AutoMSn(949.4932), 129.7 min (13229323981551896)	13A/AvB	0.156	16A/AvB	0.227	27A/AvB	0.208	29A/AvB	0.187	10B/AvB	0.254	21B/AvB	0.368	25B/AvB	0.205	37B/AvB	0.173	113	5926.21	114	3651.62	115	5301.77
1	Q9TV62	Myosin-4 OS=Sus scrofa GN=MYH4 PE=2 SV=1	30936	287893	1373	1373	114	114	113457	1	1	1	949.493	1896.97	2	1896.98	-0.0052	0	23.15	0.0067	R	VVESMQSTLDAEIR	S	Oxidation (M)	0.00002000000000.0		Cmpd 11782, AutoMSn(949.4932), 131.3 min (13229323981552180)	13A/AvB	0.258	16A/AvB	0.2	27A/AvB	0.17	29A/AvB	0.204	10B/AvB	0.276	21B/AvB	0.274	25B/AvB	0.196	37B/AvB	0.254	113	5819.88	114	5434.21	115	4212.28
1	Q9TV62	Myosin-4 OS=Sus scrofa GN=MYH4 PE=2 SV=1	30936	287893	1373	1373	114	114	113460	1	1	1	633.331	1896.97	3	1896.98	-0.0049	0	39.58	0.00019	R	VVESMQSTLDAEIR	S	Oxidation (M)	0.00002000000000.0		Cmpd 11531, AutoMSn(633.3313), 127.6 min (13229323981813755)	13A/AvB	0.217	16A/AvB	0.285	27A/AvB	0.285	29A/AvB	0.306	10B/AvB	0.394	21B/AvB	0.28	25B/AvB	0.175	37B/AvB	0.151	113	27873	114	15354.8	115	20190.6
1	Q9TV62	Myosin-4 OS=Sus scrofa GN=MYH4 PE=2 SV=1	30936	287893	1373	1373	114	114	113461	1	1	1	949.493	1896.97	2	1896.98	-0.0048	0	54.54	7.7e-06	R	VVESMQSTLDAEIR	S	Oxidation (M)	0.00002000000000.0		Cmpd 11544, AutoMSn(949.4933), 127.7 min (13229323981813781)	13A/AvB	0.227	16A/AvB	0.344	27A/AvB	0.215	29A/AvB	0.218	10B/AvB	0.165	21B/AvB	0.407	25B/AvB	0.145	37B/AvB	0.283	113	4279.72	114	5895.97	115	8929.53
1	Q9TV62	Myosin-4 OS=Sus scrofa GN=MYH4 PE=2 SV=1	30936	287893	1373	1373	114	114	113462	1	1	1	949.493	1896.97	2	1896.98	-0.0048	0	60.93	1.9e-06	R	VVESMQSTLDAEIR	S	Oxidation (M)	0.00002000000000.0		Cmpd 23164, AutoMSn(949.4933), 262.8 min (13229323981739729)	13A/AvB	0.214	16A/AvB	0.109	27A/AvB	0.189	29A/AvB	0.271	10B/AvB	0.257	21B/AvB	0.273	25B/AvB	0.158	37B/AvB	0.313	113	11275.6	114	9401.1	115	4791.88
1	Q9TV62	Myosin-4 OS=Sus scrofa GN=MYH4 PE=2 SV=1	30936	287893	1373	1373	114	114	113464	1	1	1	633.331	1896.97	3	1896.98	-0.0047	0	29.07	0.0019	R	VVESMQSTLDAEIR	S	Oxidation (M)	0.00002000000000.0		Cmpd 11691, AutoMSn(633.3313), 130.2 min (13229323981862736)	13A/AvB	0.232	16A/AvB	0.266	27A/AvB	0.238	29A/AvB	0.204	10B/AvB	0.339	21B/AvB	0.336	25B/AvB	0.165	37B/AvB	0.16	113	12779	114	8739.13	115	10007.3
1	Q9TV62	Myosin-4 OS=Sus scrofa GN=MYH4 PE=2 SV=1	30936	287893	1373	1373	114	114	113467	1	1	1	633.331	1896.97	3	1896.98	-0.0045	0	43.94	7.6e-05	R	VVESMQSTLDAEIR	S	Oxidation (M)	0.00002000000000.0		Cmpd 23332, AutoMSn(633.3314), 262.8 min (13229323981575280)	13A/AvB	0.194	16A/AvB	0.275	27A/AvB	0.312	29A/AvB	0.319	10B/AvB	0.378	21B/AvB	0.405	25B/AvB	0.217	37B/AvB	0	113	1799.63	114	924.056	115	1310.29
1	Q9TV62	Myosin-4 OS=Sus scrofa GN=MYH4 PE=2 SV=1	30936	287893	1373	1373	114	114	113468	1	1	1	633.331	1896.97	3	1896.98	-0.0045	0	54.42	7.9e-06	R	VVESMQSTLDAEIR	S	Oxidation (M)	0.00002000000000.0		Cmpd 11226, AutoMSn(633.3315), 124.9 min (13229323981861806)	13A/AvB	0.283	16A/AvB	0.391	27A/AvB	0.365	29A/AvB	0.204	10B/AvB	0.393	21B/AvB	0.351	25B/AvB	0.114	37B/AvB	0.142	113	16376.8	114	11790.3	115	16310.9
1	Q9TV62	Myosin-4 OS=Sus scrofa GN=MYH4 PE=2 SV=1	30936	287893	1373	1373	114	114	113470	1	1	1	633.331	1896.97	3	1896.98	-0.0045	0	51.67	1.4e-05	R	VVESMQSTLDAEIR	S	Oxidation (M)	0.00002000000000.0		Cmpd 11227, AutoMSn(633.3315), 125.0 min (13229323981861808)	13A/AvB	0.149	16A/AvB	0.317	27A/AvB	0.184	29A/AvB	0.133	10B/AvB	0.417	21B/AvB	0.266	25B/AvB	0.143	37B/AvB	0.175	113	18796.9	114	6740.31	115	14277.3
1	Q9TV62	Myosin-4 OS=Sus scrofa GN=MYH4 PE=2 SV=1	30936	287893	1373	1373	114	114	113471	1	1	1	949.494	1896.97	2	1896.98	-0.0044	0	22.89	0.0071	R	VVESMQSTLDAEIR	S	Oxidation (M)	0.00002000000000.0		Cmpd 11545, AutoMSn(949.4936), 130.0 min (13229323981765582)	13A/AvB	-0.039	16A/AvB	0.465	27A/AvB	0.599	29A/AvB	-0.013	10B/AvB	0.402	21B/AvB	0.496	25B/AvB	-0.051	37B/AvB	0.153	113	3015.79	114	-293.839	115	3483.1
1	Q9TV62	Myosin-4 OS=Sus scrofa GN=MYH4 PE=2 SV=1	30936	287893	1373	1373	114	114	113473	1	1	1	633.332	1896.97	3	1896.98	-0.0043	0	27.21	0.0028	R	VVESMQSTLDAEIR	S	Oxidation (M)	0.00002000000000.0		Cmpd 11616, AutoMSn(633.3315), 130.8 min (13229323981765724)	13A/AvB	-0.093	16A/AvB	2.107	27A/AvB	0	29A/AvB	-0.001	10B/AvB	0.686	21B/AvB	-0.111	25B/AvB	0.002	37B/AvB	0.422	113	5218.78	114	-710.381	115	16014.9
1	Q9TV62	Myosin-4 OS=Sus scrofa GN=MYH4 PE=2 SV=1	30936	287893	1373	1373	114	114	113474	1	1	1	633.332	1896.97	3	1896.98	-0.0043	0	56.08	5.5e-06	R	VVESMQSTLDAEIR	S	Oxidation (M)	0.00002000000000.0		Cmpd 11297, AutoMSn(633.3315), 125.8 min (13229323981861948)	13A/AvB	0.217	16A/AvB	0.283	27A/AvB	0.224	29A/AvB	0.196	10B/AvB	0.332	21B/AvB	0.332	25B/AvB	0.143	37B/AvB	0.193	113	19746.5	114	12918.1	115	16788.1
1	Q9TV62	Myosin-4 OS=Sus scrofa GN=MYH4 PE=2 SV=1	30936	287893	1373	1373	114	114	113475	1	1	1	633.332	1896.97	3	1896.98	-0.0043	0	22.82	0.0072	R	VVESMQSTLDAEIR	S	Oxidation (M)	0.00002000000000.0		Cmpd 11603, AutoMSn(633.3315), 128.4 min (13229323981813899)	13A/AvB	0.227	16A/AvB	0.341	27A/AvB	0.313	29A/AvB	0.357	10B/AvB	0.377	21B/AvB	0.285	25B/AvB	0.167	37B/AvB	0.171	113	26232.1	114	15771.4	115	23680
1	Q9TV62	Myosin-4 OS=Sus scrofa GN=MYH4 PE=2 SV=1	30936	287893	1373	1373	114	114	113476	1	1	1	949.494	1896.97	2	1896.98	-0.0042	0	16.43	0.029	R	VVESMQSTLDAEIR	S	Oxidation (M)	0.00002000000000.0		Cmpd 11475, AutoMSn(949.4936), 129.2 min (13229323981765442)	13A/AvB	-0.064	16A/AvB	0.074	27A/AvB	0.179	29A/AvB	0.062	10B/AvB	0.84	21B/AvB	0.035	25B/AvB	-0.011	37B/AvB	0.136	113	10258.8	114	-778.298	115	903.629
1	Q9TV62	Myosin-4 OS=Sus scrofa GN=MYH4 PE=2 SV=1	30936	287893	1373	1373	114	114	113477	1	1	1	949.494	1896.97	2	1896.98	-0.0042	0	54.87	7.2e-06	R	VVESMQSTLDAEIR	S	Oxidation (M)	0.00002000000000.0		Cmpd 23445, AutoMSn(949.4937), 262.7 min (13229323981837583)	13A/AvB	0.255	16A/AvB	0.309	27A/AvB	0.225	29A/AvB	0.231	10B/AvB	0.282	21B/AvB	0.285	25B/AvB	0.184	37B/AvB	0.249	113	33322.8	114	30114.2	115	36586.3
1	Q9TV62	Myosin-4 OS=Sus scrofa GN=MYH4 PE=2 SV=1	30936	287893	1373	1373	114	114	113478	1	1	1	633.332	1896.97	3	1896.98	-0.0041	0	68.38	7.9e-07	R	VVESMQSTLDAEIR	S	Oxidation (M)	0.00002000000000.0		Cmpd 23448, AutoMSn(633.3315), 262.8 min (13229323981837589)	13A/AvB	0.207	16A/AvB	0.291	27A/AvB	0.172	29A/AvB	0.206	10B/AvB	0.254	21B/AvB	0.374	25B/AvB	0.126	37B/AvB	0.245	113	10645.3	114	8695.49	115	12219.8
1	Q9TV62	Myosin-4 OS=Sus scrofa GN=MYH4 PE=2 SV=1	30936	287893	1373	1373	114	114	113479	1	1	1	949.494	1896.97	2	1896.98	-0.0041	0	15.49	0.035	R	VVESMQSTLDAEIR	S	Oxidation (M)	0.00002000000000.0		Cmpd 11588, AutoMSn(949.4937), 130.7 min (13229323981716579)	13A/AvB	0.401	16A/AvB	0.335	27A/AvB	0.245	29A/AvB	0.276	10B/AvB	0.289	21B/AvB	0.238	25B/AvB	0.176	37B/AvB	0.297	113	2699.19	114	3751.73	115	3134.12
1	Q9TV62	Myosin-4 OS=Sus scrofa GN=MYH4 PE=2 SV=1	30936	287893	1373	1373	114	114	113481	1	1	1	949.494	1896.97	2	1896.98	-0.0041	0	28.64	0.0021	R	VVESMQSTLDAEIR	S	Oxidation (M)	0.00002000000000.0		Cmpd 11322, AutoMSn(949.4937), 126.0 min (13229323981861998)	13A/AvB	0.287	16A/AvB	0.223	27A/AvB	0.14	29A/AvB	0.221	10B/AvB	0.233	21B/AvB	0.356	25B/AvB	0.181	37B/AvB	0.23	113	6687.48	114	8227.01	115	6388.84
1	Q9TV62	Myosin-4 OS=Sus scrofa GN=MYH4 PE=2 SV=1	30936	287893	1373	1373	114	114	113482	1	1	1	949.494	1896.97	2	1896.98	-0.0041	0	26.55	0.0032	R	VVESMQSTLDAEIR	S	Oxidation (M)	0.00002000000000.0		Cmpd 11109, AutoMSn(949.4937), 123.6 min (13229323981861572)	13A/AvB	0.343	16A/AvB	0.341	27A/AvB	0.266	29A/AvB	0.247	10B/AvB	0.166	21B/AvB	0.447	25B/AvB	0.109	37B/AvB	0.278	113	3714.81	114	7665.41	115	7618.08
1	Q9TV62	Myosin-4 OS=Sus scrofa GN=MYH4 PE=2 SV=1	30936	287893	1373	1373	114	114	113483	1	1	1	949.494	1896.97	2	1896.98	-0.0039	0	18.84	0.017	R	VVESMQSTLDAEIR	S	Oxidation (M)	0.00002000000000.0		Cmpd 11495, AutoMSn(949.4938), 128.0 min (13229323981551606)	13A/AvB	0.267	16A/AvB	0.259	27A/AvB	0.348	29A/AvB	0.2	10B/AvB	0.245	21B/AvB	0.408	25B/AvB	0.112	37B/AvB	0.235	113	3865.93	114	4224.42	115	4091.97
1	Q9TV62	Myosin-4 OS=Sus scrofa GN=MYH4 PE=2 SV=1	30936	287893	1373	1373	114	114	113484	1	1	1	949.494	1896.97	2	1896.98	-0.0039	0	41.44	0.00013	R	VVESMQSTLDAEIR	S	Oxidation (M)	0.00002000000000.0		Cmpd 11473, AutoMSn(949.4938), 126.9 min (13229323981813639)	13A/AvB	0.299	16A/AvB	0.163	27A/AvB	0.245	29A/AvB	0.166	10B/AvB	0.285	21B/AvB	0.372	25B/AvB	0.145	37B/AvB	0.198	113	8444.62	114	8881.16	115	4823.57
1	Q9TV62	Myosin-4 OS=Sus scrofa GN=MYH4 PE=2 SV=1	30936	287893	1373	1373	114	114	113485	1	1	1	949.494	1896.97	2	1896.98	-0.0038	0	41.66	0.00012	R	VVESMQSTLDAEIR	S	Oxidation (M)	0.00002000000000.0		Cmpd 11711, AutoMSn(949.4939), 130.5 min (13229323981552038)	13A/AvB	0.251	16A/AvB	0.133	27A/AvB	0.246	29A/AvB	0.153	10B/AvB	0.331	21B/AvB	0.378	25B/AvB	0.099	37B/AvB	0.192	113	7802.66	114	5922.21	115	3124.69
1	Q9TV62	Myosin-4 OS=Sus scrofa GN=MYH4 PE=2 SV=1	30936	287893	1373	1373	114	114	113486	1	1	1	949.494	1896.97	2	1896.98	-0.0038	0	53.16	1e-05	R	VVESMQSTLDAEIR	S	Oxidation (M)	0.00002000000000.0		Cmpd 11616, AutoMSn(949.4939), 128.5 min (13229323981813925)	13A/AvB	0.2	16A/AvB	0.287	27A/AvB	0.183	29A/AvB	0.217	10B/AvB	0.216	21B/AvB	0.4	25B/AvB	0.137	37B/AvB	0.246	113	5814.06	114	5370.56	115	7701.81
1	Q9TV62	Myosin-4 OS=Sus scrofa GN=MYH4 PE=2 SV=1	30936	287893	1373	1373	114	114	113489	1	1	1	949.494	1896.97	2	1896.98	-0.0037	0	27.31	0.0027	R	VVESMQSTLDAEIR	S	Oxidation (M)	0.00002000000000.0		Cmpd 11393, AutoMSn(949.4939), 126.8 min (13229323981862140)	13A/AvB	0.18	16A/AvB	0.314	27A/AvB	0.169	29A/AvB	0.278	10B/AvB	0.214	21B/AvB	0.386	25B/AvB	0.143	37B/AvB	0.257	113	5404.57	114	4551.02	115	7935.1
1	Q9TV62	Myosin-4 OS=Sus scrofa GN=MYH4 PE=2 SV=1	30936	287893	1373	1373	114	114	113490	1	1	1	949.494	1896.97	2	1896.98	-0.0037	0	32.71	0.00086	R	VVESMQSTLDAEIR	S	Oxidation (M)	0.00002000000000.0		Cmpd 23331, AutoMSn(949.4939), 262.8 min (13229323981575278)	13A/AvB	0.288	16A/AvB	0.377	27A/AvB	0.157	29A/AvB	0.209	10B/AvB	0.248	21B/AvB	0.252	25B/AvB	0.189	37B/AvB	0.311	113	10008.3	114	11627.5	115	15259.5
1	Q9TV62	Myosin-4 OS=Sus scrofa GN=MYH4 PE=2 SV=1	30936	287893	1373	1373	114	114	113491	1	1	1	949.494	1896.97	2	1896.98	-0.0037	0	31.03	0.0012	R	VVESMQSTLDAEIR	S	Oxidation (M)	0.00002000000000.0		Cmpd 23184, AutoMSn(949.4939), 262.8 min (13229323981788860)	13A/AvB	0.446	16A/AvB	1.536	27A/AvB	0.9	29A/AvB	0.045	10B/AvB	0.415	21B/AvB	0.05	25B/AvB	-0.049	37B/AvB	0.584	113	8216.86	114	8829.92	115	30427.4
1	Q9TV62	Myosin-4 OS=Sus scrofa GN=MYH4 PE=2 SV=1	30936	287893	1373	1373	114	114	113493	1	1	1	633.332	1896.97	3	1896.98	-0.0036	0	35.51	0.00047	R	VVESMQSTLDAEIR	S	Oxidation (M)	0.00002000000000.0		Cmpd 11770, AutoMSn(633.3317), 131.1 min (13229323981862894)	13A/AvB	0.204	16A/AvB	0.343	27A/AvB	0.214	29A/AvB	0.196	10B/AvB	0.333	21B/AvB	0.322	25B/AvB	0.161	37B/AvB	0.184	113	10622.1	114	6518.36	115	10960.9
1	Q9TV62	Myosin-4 OS=Sus scrofa GN=MYH4 PE=2 SV=1	30936	287893	1373	1373	114	114	113494	1	1	1	633.332	1896.97	3	1896.98	-0.0036	0	93.1	2.1e-09	R	VVESMQSTLDAEIR	S	Oxidation (M)	0.00002000000000.0		Cmpd 23389, AutoMSn(633.3317), 262.7 min (13229323981886132)	13A/AvB	0.286	16A/AvB	0.247	27A/AvB	0.22	29A/AvB	0.225	10B/AvB	0.255	21B/AvB	0.347	25B/AvB	0.167	37B/AvB	0.231	113	22294.7	114	24987	115	21595
1	Q9TV62	Myosin-4 OS=Sus scrofa GN=MYH4 PE=2 SV=1	30936	287893	1373	1373	114	114	113496	1	1	1	949.494	1896.97	2	1896.98	-0.0034	0	25.44	0.0041	R	VVESMQSTLDAEIR	S	Oxidation (M)	0.00002000000000.0		Cmpd 11178, AutoMSn(949.4940), 124.4 min (13229323981861710)	13A/AvB	0.215	16A/AvB	0.279	27A/AvB	0.21	29A/AvB	0.199	10B/AvB	0.245	21B/AvB	0.371	25B/AvB	0.134	37B/AvB	0.249	113	6745.26	114	5923.46	115	7682.61
1	Q9TV62	Myosin-4 OS=Sus scrofa GN=MYH4 PE=2 SV=1	30936	287893	1373	1373	114	114	113497	1	1	1	949.494	1896.97	2	1896.98	-0.0034	0	55.86	5.8e-06	R	VVESMQSTLDAEIR	S	Oxidation (M)	0.00002000000000.0		Cmpd 11250, AutoMSn(949.4940), 125.2 min (13229323981861854)	13A/AvB	0.268	16A/AvB	0.192	27A/AvB	0.246	29A/AvB	0.247	10B/AvB	0.251	21B/AvB	0.397	25B/AvB	0.135	37B/AvB	0.217	113	7490.86	114	8004.51	115	5727.76
1	Q9TV62	Myosin-4 OS=Sus scrofa GN=MYH4 PE=2 SV=1	30936	287893	1373	1373	114	114	113498	1	1	1	633.332	1896.97	3	1896.98	-0.0034	0	73.78	1.9e-07	R	VVESMQSTLDAEIR	S	Oxidation (M)	0.00002000000000.0		Cmpd 23185, AutoMSn(633.3318), 262.8 min (13229323981788862)	13A/AvB	0.43	16A/AvB	1.466	27A/AvB	0.641	29A/AvB	-0.014	10B/AvB	0.438	21B/AvB	0.14	25B/AvB	-0.04	37B/AvB	0.462	113	2748.57	114	2702.64	115	9210.94
1	Q9TV62	Myosin-4 OS=Sus scrofa GN=MYH4 PE=2 SV=1	30936	287893	1373	1373	114	114	113501	1	1	1	949.494	1896.97	2	1896.98	-0.0031	0	21.83	0.009	R	VVESMQSTLDAEIR	S	Oxidation (M)	0.00002000000000.0		Cmpd 11567, AutoMSn(949.4942), 128.8 min (13229323981551750)	13A/AvB	0.123	16A/AvB	0.309	27A/AvB	0.299	29A/AvB	0.171	10B/AvB	0.213	21B/AvB	0.423	25B/AvB	0.083	37B/AvB	0.28	113	3753.3	114	2160.42	115	5436.33
1	Q9TV62	Myosin-4 OS=Sus scrofa GN=MYH4 PE=2 SV=1	30936	287893	1373	1373	114	114	113503	1	1	1	633.332	1896.97	3	1896.98	-0.003	0	17.08	0.025	R	VVESMQSTLDAEIR	S	Oxidation (M)	0.00002000000000.0		Cmpd 11388, AutoMSn(633.3319), 126.0 min (13229323981813469)	13A/AvB	0.232	16A/AvB	0.321	27A/AvB	0.269	29A/AvB	0.322	10B/AvB	0.294	21B/AvB	0.368	25B/AvB	0.132	37B/AvB	0.206	113	17615.1	114	13919	115	19238.4
1	Q9TV62	Myosin-4 OS=Sus scrofa GN=MYH4 PE=2 SV=1	30936	287893	1373	1373	114	114	113505	1	1	1	949.494	1896.97	2	1896.98	-0.003	0	76.2	7.2e-08	R	VVESMQSTLDAEIR	S	Oxidation (M)	0.00002000000000.0		Cmpd 23447, AutoMSn(949.4942), 262.8 min (13229323981837587)	13A/AvB	0.254	16A/AvB	0.268	27A/AvB	0.235	29A/AvB	0.245	10B/AvB	0.239	21B/AvB	0.332	25B/AvB	0.154	37B/AvB	0.275	113	31885.4	114	33829.8	115	35711.6
1	Q9TV62	Myosin-4 OS=Sus scrofa GN=MYH4 PE=2 SV=1	30936	287893	1373	1373	114	114	113507	1	1	1	949.494	1896.97	2	1896.98	-0.0028	0	63.38	1.1e-06	R	VVESMQSTLDAEIR	S	Oxidation (M)	0.00002000000000.0		Cmpd 23388, AutoMSn(949.4943), 262.7 min (13229323981886130)	13A/AvB	0.279	16A/AvB	0.283	27A/AvB	0.243	29A/AvB	0.223	10B/AvB	0.237	21B/AvB	0.319	25B/AvB	0.168	37B/AvB	0.276	113	62396.5	114	73656.8	115	74469.7
1	Q9TV62	Myosin-4 OS=Sus scrofa GN=MYH4 PE=2 SV=1	30936	287893	1373	1373	114	114	113508	1	1	1	633.332	1896.97	3	1896.98	-0.0025	0	18.69	0.018	R	VVESMQSTLDAEIR	S	Oxidation (M)	0.00002000000000.0		Cmpd 11836, AutoMSn(633.3321), 133.3 min (13229323981766164)	13A/AvB	-0.038	16A/AvB	0.022	27A/AvB	0.047	29A/AvB	0.176	10B/AvB	0.507	21B/AvB	0.478	25B/AvB	-0.023	37B/AvB	0.037	113	8049.61	114	-603.324	115	344.315
1	Q9TV62	Myosin-4 OS=Sus scrofa GN=MYH4 PE=2 SV=1	30936	287893	1373	1373	114	114	113509	1	1	1	949.495	1896.97	2	1896.98	-0.0025	0	26.18	0.0035	R	VVESMQSTLDAEIR	S	Oxidation (M)	0.00002000000000.0		Cmpd 11689, AutoMSn(949.4945), 131.7 min (13229323981765870)	13A/AvB	0.507	16A/AvB	0.224	27A/AvB	-0.018	29A/AvB	0	10B/AvB	0.243	21B/AvB	0.06	25B/AvB	0.593	37B/AvB	0.104	113	2064.77	114	4303.15	115	1904.85
1	Q9TV62	Myosin-4 OS=Sus scrofa GN=MYH4 PE=2 SV=1	30936	287893	1373	1373	114	114	113510	1	1	1	949.495	1896.97	2	1896.98	-0.0023	0	16.62	0.028	R	VVESMQSTLDAEIR	S	Oxidation (M)	0.00002000000000.0		Cmpd 11734, AutoMSn(949.4946), 132.4 min (13229323981716871)	13A/AvB	0.189	16A/AvB	0.333	27A/AvB	0.42	29A/AvB	0.319	10B/AvB	0.274	21B/AvB	0.388	25B/AvB	0.076	37B/AvB	0.262	113	1685.25	114	1160.74	115	2042.55
1	Q9TV62	Myosin-4 OS=Sus scrofa GN=MYH4 PE=2 SV=1	30936	287893	1373	1373	114	114	113511	1	1	1	633.332	1896.97	3	1896.98	-0.0023	0	37.06	0.00035	R	VVESMQSTLDAEIR	S	Oxidation (M)	0.00002000000000.0		Cmpd 11442, AutoMSn(633.3321), 127.4 min (13229323981862238)	13A/AvB	0.2	16A/AvB	0.248	27A/AvB	0.274	29A/AvB	0.19	10B/AvB	0.368	21B/AvB	0.305	25B/AvB	0.172	37B/AvB	0.155	113	14838.2	114	8059.58	115	10012.8
1	Q9TV62	Myosin-4 OS=Sus scrofa GN=MYH4 PE=2 SV=1	30936	287893	1373	1373	114	114	113512	1	1	1	633.332	1896.97	3	1896.98	-0.0023	0	53.04	1.1e-05	R	VVESMQSTLDAEIR	S	Oxidation (M)	0.00002000000000.0		Cmpd 11155, AutoMSn(633.3321), 124.2 min (13229323981861664)	13A/AvB	0.264	16A/AvB	0.286	27A/AvB	0.218	29A/AvB	0.174	10B/AvB	0.322	21B/AvB	0.312	25B/AvB	0.161	37B/AvB	0.205	113	17780.4	114	14610.4	115	15811.2
1	Q9TV62	Myosin-4 OS=Sus scrofa GN=MYH4 PE=2 SV=1	30936	287893	1373	1373	114	114	113513	1	1	1	949.495	1896.97	2	1896.98	-0.0021	0	25.79	0.0038	R	VVESMQSTLDAEIR	S	Oxidation (M)	0.00002000000000.0		Cmpd 11518, AutoMSn(949.4947), 129.9 min (13229323981716439)	13A/AvB	0.205	16A/AvB	0.149	27A/AvB	0.3	29A/AvB	0.117	10B/AvB	0.214	21B/AvB	0.352	25B/AvB	0.08	37B/AvB	0.354	113	2066.76	114	1979.12	115	1436.99
1	Q9TV62	Myosin-4 OS=Sus scrofa GN=MYH4 PE=2 SV=1	30936	287893	1373	1373	114	114	113515	1	1	1	633.332	1896.97	3	1896.98	-0.0019	0	29.29	0.0018	R	VVESMQSTLDAEIR	S	Oxidation (M)	0.00002000000000.0		Cmpd 11085, AutoMSn(633.3323), 123.3 min (13229323981861524)	13A/AvB	0.269	16A/AvB	0.364	27A/AvB	0.285	29A/AvB	0.246	10B/AvB	0.271	21B/AvB	0.416	25B/AvB	0.129	37B/AvB	0.184	113	11108.5	114	11015.6	115	14901.8
1	Q9TV62	Myosin-4 OS=Sus scrofa GN=MYH4 PE=2 SV=1	30936	287893	1373	1373	114	114	113518	1	1	1	633.332	1896.98	3	1896.98	-0.0016	0	28.52	0.0021	R	VVESMQSTLDAEIR	S	Oxidation (M)	0.00002000000000.0		Cmpd 11687, AutoMSn(633.3324), 130.2 min (13229323981551990)	13A/AvB	0.194	16A/AvB	0.299	27A/AvB	0.22	29A/AvB	0.154	10B/AvB	0.396	21B/AvB	0.336	25B/AvB	0.099	37B/AvB	0.169	113	8760.15	114	4303.42	115	6608.7
1	Q9TV62	Myosin-4 OS=Sus scrofa GN=MYH4 PE=2 SV=1	30936	287893	1373	1373	114	114	113519	1	1	1	633.332	1896.98	3	1896.98	-0.0014	0	28.36	0.0022	R	VVESMQSTLDAEIR	S	Oxidation (M)	0.00002000000000.0		Cmpd 11515, AutoMSn(633.3325), 128.2 min (13229323981862384)	13A/AvB	0.318	16A/AvB	0.387	27A/AvB	0.249	29A/AvB	0.24	10B/AvB	0.27	21B/AvB	0.355	25B/AvB	0.152	37B/AvB	0.224	113	10715.2	114	12636.8	115	15400.7
1	Q9TV62	Myosin-4 OS=Sus scrofa GN=MYH4 PE=2 SV=1	30936	287893	1373	1373	114	114	113520	1	1	1	633.333	1896.98	3	1896.98	-0.001	0	31.75	0.0011	R	VVESMQSTLDAEIR	S	Oxidation (M)	0.00002000000000.0		Cmpd 11544, AutoMSn(633.3326), 130.0 min (13229323981765580)	13A/AvB	-0.086	16A/AvB	1.078	27A/AvB	0.546	29A/AvB	-0.012	10B/AvB	0.862	21B/AvB	-0.056	25B/AvB	-0.026	37B/AvB	0.22	113	9467.9	114	-940.761	115	11838.8
1	Q9TV62	Myosin-4 OS=Sus scrofa GN=MYH4 PE=2 SV=1	30936	287893	1373	1373	114	114	113521	1	1	1	633.333	1896.98	3	1896.98	-0.0008	0	46.73	4.1e-05	R	VVESMQSTLDAEIR	S	Oxidation (M)	0.00002000000000.0		Cmpd 11369, AutoMSn(633.3326), 126.6 min (13229323981862092)	13A/AvB	0.334	16A/AvB	0.378	27A/AvB	0.307	29A/AvB	0.183	10B/AvB	0.346	21B/AvB	0.25	25B/AvB	0.198	37B/AvB	0.206	113	15601	114	15037.4	115	17038.5
1	Q9TV62	Myosin-4 OS=Sus scrofa GN=MYH4 PE=2 SV=1	30936	287893	1373	1373	114	114	113523	1	1	1	633.333	1896.98	3	1896.98	-0.0005	0	16.94	0.026	R	VVESMQSTLDAEIR	S	Oxidation (M)	0.00002000000000.0		Cmpd 11920, AutoMSn(633.3327), 132.8 min (13229323981863194)	13A/AvB	0.237	16A/AvB	0.455	27A/AvB	0.23	29A/AvB	0.215	10B/AvB	0.356	21B/AvB	0.347	25B/AvB	0.127	37B/AvB	0.17	113	9769.56	114	6490.56	115	12481.8
1	Q9TV62	Myosin-4 OS=Sus scrofa GN=MYH4 PE=2 SV=1	30936	287893	1373	1373	114	114	113531	1	1	1	633.333	1896.98	3	1896.98	0.0012	0	14.37	0.045	R	VVESMQSTLDAEIR	S	Oxidation (M)	0.00002000000000.0		Cmpd 12078, AutoMSn(633.3333), 133.7 min (13229323981814849)	13A/AvB	0.235	16A/AvB	0.352	27A/AvB	0.249	29A/AvB	0.204	10B/AvB	0.321	21B/AvB	0.364	25B/AvB	0.129	37B/AvB	0.186	113	13061.4	114	9560.14	115	14315.8
1	Q9TV62	Myosin-4 OS=Sus scrofa GN=MYH4 PE=2 SV=1	30936	287893	1373	1373	114	114	113533	1	1	1	633.334	1896.98	3	1896.98	0.0019	0	18.06	0.02	R	VVESMQSTLDAEIR	S	Oxidation (M)	0.00002000000000.0		Cmpd 11971, AutoMSn(633.3335), 132.5 min (13229323981814635)	13A/AvB	0.163	16A/AvB	0.3	27A/AvB	0.173	29A/AvB	0.191	10B/AvB	0.335	21B/AvB	0.341	25B/AvB	0.156	37B/AvB	0.168	113	14197.5	114	6889.46	115	12690.9
1	Q9TV62	Myosin-4 OS=Sus scrofa GN=MYH4 PE=2 SV=1	30936	287893	1373	1373	114	114	113535	1	1	1	633.334	1896.98	3	1896.98	0.0023	0	16.84	0.026	R	VVESMQSTLDAEIR	S	Oxidation (M)	0.00002000000000.0		Cmpd 11888, AutoMSn(633.3337), 131.6 min (13229323981814469)	13A/AvB	0.205	16A/AvB	0.337	27A/AvB	0.215	29A/AvB	0.261	10B/AvB	0.321	21B/AvB	0.306	25B/AvB	0.165	37B/AvB	0.208	113	18251.6	114	11679.2	115	19190.7
1	Q9TV62	Myosin-4 OS=Sus scrofa GN=MYH4 PE=2 SV=1	30936	287893	1373	1373	114	114	113539	1	1	1	633.334	1896.98	3	1896.98	0.0028	0	27.58	0.0026	R	VVESMQSTLDAEIR	S	Oxidation (M)	0.00002000000000.0		Cmpd 23523, AutoMSn(633.3339), 263.6 min (13229323981837739)	13A/AvB	0.183	16A/AvB	0.343	27A/AvB	0.396	29A/AvB	0.294	10B/AvB	0.41	21B/AvB	0.266	25B/AvB	0.174	37B/AvB	0.15	113	1715.1	114	764.343	115	1435.68
1	Q9TV62	Myosin-4 OS=Sus scrofa GN=MYH4 PE=2 SV=1	30936	287893	1373	1373	114	114	113540	1	1	1	633.334	1896.98	3	1896.98	0.0028	0	18.35	0.019	R	VVESMQSTLDAEIR	S	Oxidation (M)	0.00002000000000.0		Cmpd 11688, AutoMSn(633.3339), 131.7 min (13229323981765868)	13A/AvB	0.707	16A/AvB	0.15	27A/AvB	0.752	29A/AvB	-0.015	10B/AvB	0.327	21B/AvB	0.742	25B/AvB	-0.069	37B/AvB	0	113	3323.37	114	7189.59	115	1526.43
1	Q9TV62	Myosin-4 OS=Sus scrofa GN=MYH4 PE=2 SV=1	30936	287893	1373	1373	114	114	113541	1	1	1	633.334	1896.98	3	1896.98	0.003	0	16.59	0.028	R	VVESMQSTLDAEIR	S	Oxidation (M)	0.00002000000000.0		Cmpd 11943, AutoMSn(633.3339), 134.5 min (13229323981766378)	13A/AvB	-0.095	16A/AvB	1.309	27A/AvB	1.388	29A/AvB	-0.028	10B/AvB	0.921	21B/AvB	0.157	25B/AvB	-0.078	37B/AvB	0	113	4488.36	114	-461.412	115	6375.84
1	Q9TV62	Myosin-4 OS=Sus scrofa GN=MYH4 PE=2 SV=1	30936	287893	1373	1373	114	114	113557	1	1	1	633.337	1896.99	3	1896.98	0.012	0	24.24	0.0053	R	VVESMQSTLDAEIR	S	Oxidation (M)	0.00002000000000.0		Cmpd 11842, AutoMSn(633.3369), 131.9 min (13229323981863038)	13A/AvB	0.187	16A/AvB	0.286	27A/AvB	0.294	29A/AvB	0.321	10B/AvB	0.313	21B/AvB	0.315	25B/AvB	0.177	37B/AvB	0.195	113	11195.3	114	6697.1	115	10230.9
1	Q9TV62	Myosin-4 OS=Sus scrofa GN=MYH4 PE=2 SV=1	30936	287893	1373	1373	114	114	114455	1	1	0	488.787	1951.12	4	1951.13	-0.0105	1	25.19	0.0043	R	ADIAESQVNKLR	V				Cmpd 11436, AutoMSn(488.7875), 128.8 min (13229323981765364)	13A/AvB	-0.07	16A/AvB	0.069	27A/AvB	0.352	29A/AvB	-0.007	10B/AvB	0.92	21B/AvB	-0.003	25B/AvB	-0.018	37B/AvB	0.101	113	47597.5	114	-3598.24	115	3557.95
1	Q9TV62	Myosin-4 OS=Sus scrofa GN=MYH4 PE=2 SV=1	30936	287893	1373	1373	114	114	114456	1	1	0	488.788	1951.12	4	1951.13	-0.01	1	22.15	0.0084	R	ADIAESQVNKLR	V				Cmpd 11189, AutoMSn(488.7876), 123.8 min (13229323981813071)	13A/AvB	0.261	16A/AvB	0.341	27A/AvB	0.275	29A/AvB	0.234	10B/AvB	0.283	21B/AvB	0.325	25B/AvB	0.184	37B/AvB	0.208	113	40848.6	114	37645.4	115	49220
1	Q9TV62	Myosin-4 OS=Sus scrofa GN=MYH4 PE=2 SV=1	30936	287893	1373	1373	114	114	114458	1	1	0	488.788	1951.12	4	1951.13	-0.0099	1	21.53	0.0096	R	ADIAESQVNKLR	V				Cmpd 10914, AutoMSn(488.7876), 121.5 min (13229323981861182)	13A/AvB	0.225	16A/AvB	0.409	27A/AvB	0.307	29A/AvB	0.164	10B/AvB	0.292	21B/AvB	0.362	25B/AvB	0.159	37B/AvB	0.186	113	23452.2	114	18082.6	115	32838.9
1	Q9TV62	Myosin-4 OS=Sus scrofa GN=MYH4 PE=2 SV=1	30936	287893	1373	1373	114	114	114463	1	1	0	488.788	1951.12	4	1951.13	-0.0088	1	14.81	0.041	R	ADIAESQVNKLR	V				Cmpd 11421, AutoMSn(488.7879), 127.2 min (13229323981551458)	13A/AvB	0.25	16A/AvB	0.335	27A/AvB	0.351	29A/AvB	0.175	10B/AvB	0.272	21B/AvB	0.442	25B/AvB	0.114	37B/AvB	0.172	113	14498.8	114	13296	115	17859.2
1	Q9TV62	Myosin-4 OS=Sus scrofa GN=MYH4 PE=2 SV=1	30936	287893	1373	1373	114	114	114467	1	1	0	488.788	1951.12	4	1951.13	-0.0084	1	17.62	0.022	R	ADIAESQVNKLR	V				Cmpd 11259, AutoMSn(488.7880), 124.6 min (13229323981813211)	13A/AvB	0.272	16A/AvB	0.389	27A/AvB	0.311	29A/AvB	0.202	10B/AvB	0.278	21B/AvB	0.361	25B/AvB	0.176	37B/AvB	0.184	113	41049	114	40194.7	115	57482.8
1	Q9TV62	Myosin-4 OS=Sus scrofa GN=MYH4 PE=2 SV=1	30936	287893	1373	1373	114	114	114470	1	1	0	488.788	1951.12	4	1951.13	-0.0076	1	27.42	0.0027	R	ADIAESQVNKLR	V				Cmpd 10841, AutoMSn(488.7882), 120.6 min (13229323981861036)	13A/AvB	0.226	16A/AvB	0.269	27A/AvB	0.25	29A/AvB	0.212	10B/AvB	0.262	21B/AvB	0.314	25B/AvB	0.188	37B/AvB	0.236	113	43328.4	114	37332.9	115	44418.5
1	Q9TV62	Myosin-4 OS=Sus scrofa GN=MYH4 PE=2 SV=1	30936	287893	1373	1373	114	114	114472	1	1	0	651.382	1951.12	3	1951.13	-0.0071	1	16.98	0.026	R	ADIAESQVNKLR	V				Cmpd 11193, AutoMSn(651.3820), 123.8 min (13229323981813079)	13A/AvB	0.225	16A/AvB	0.256	27A/AvB	0.235	29A/AvB	0.186	10B/AvB	0.295	21B/AvB	0.277	25B/AvB	0.204	37B/AvB	0.224	113	42291.4	114	32338.1	115	36792.9
1	Q9TV62	Myosin-4 OS=Sus scrofa GN=MYH4 PE=2 SV=1	30936	287893	1373	1373	114	114	114990	1	1	0	497.797	1987.16	4	1987.17	-0.0112	1	14.05	0.048	R	QLEEETKAK	S				Cmpd 7884, AutoMSn(497.7974), 87.4 min (13229323981544384)	13A/AvB	0.263	16A/AvB	0.371	27A/AvB	0.276	29A/AvB	0.203	10B/AvB	0.279	21B/AvB	0.347	25B/AvB	0.164	37B/AvB	0.21	113	36894.7	114	34886.6	115	49116.2
1	Q9TV62	Myosin-4 OS=Sus scrofa GN=MYH4 PE=2 SV=1	30936	287893	1373	1373	114	114	115042	1	1	0	498.043	1988.14	4	1988.16	-0.0138	1	15	0.039	R	TEELEEAKK	K				Cmpd 8387, AutoMSn(498.0427), 93.4 min (13229323981856128)	13A/AvB	0.241	16A/AvB	0.322	27A/AvB	0.277	29A/AvB	0.206	10B/AvB	0.293	21B/AvB	0.345	25B/AvB	0.143	37B/AvB	0.219	113	90768.9	114	74776.3	115	99684.2
1	Q9TV62	Myosin-4 OS=Sus scrofa GN=MYH4 PE=2 SV=1	30936	287893	1373	1373	114	114	115043	1	1	0	498.043	1988.14	4	1988.16	-0.0136	1	19.35	0.018	R	TEELEEAKK	K				Cmpd 8427, AutoMSn(498.0428), 93.8 min (13229323981856208)	13A/AvB	0.186	16A/AvB	0.255	27A/AvB	0.231	29A/AvB	0.216	10B/AvB	0.264	21B/AvB	0.312	25B/AvB	0.17	37B/AvB	0.253	113	120603	114	84639.6	115	116256
1	Q9TV62	Myosin-4 OS=Sus scrofa GN=MYH4 PE=2 SV=1	30936	287893	1373	1373	114	114	115044	1	1	0	498.043	1988.14	4	1988.16	-0.0131	1	25.18	0.0043	R	TEELEEAKK	K				Cmpd 8812, AutoMSn(498.0429), 97.3 min (13229323981808317)	13A/AvB	0.232	16A/AvB	0.274	27A/AvB	0.242	29A/AvB	0.238	10B/AvB	0.274	21B/AvB	0.346	25B/AvB	0.178	37B/AvB	0.202	113	71913.5	114	61056.8	115	71931.9
1	Q9TV62	Myosin-4 OS=Sus scrofa GN=MYH4 PE=2 SV=1	30936	287893	1373	1373	114	114	115045	1	1	0	498.043	1988.14	4	1988.16	-0.0129	1	24.89	0.0046	R	TEELEEAKK	K				Cmpd 8465, AutoMSn(498.0430), 94.3 min (13229323981856284)	13A/AvB	0.18	16A/AvB	0.228	27A/AvB	0.223	29A/AvB	0.221	10B/AvB	0.271	21B/AvB	0.286	25B/AvB	0.189	37B/AvB	0.254	113	171242	114	113541	115	144045
1	Q9TV62	Myosin-4 OS=Sus scrofa GN=MYH4 PE=2 SV=1	30936	287893	1373	1373	114	114	115046	1	1	0	498.043	1988.14	4	1988.16	-0.0126	1	23.2	0.0067	R	TEELEEAKK	K				Cmpd 8497, AutoMSn(498.0431), 94.6 min (13229323981856348)	13A/AvB	0.209	16A/AvB	0.258	27A/AvB	0.239	29A/AvB	0.223	10B/AvB	0.276	21B/AvB	0.329	25B/AvB	0.172	37B/AvB	0.224	113	116905	114	88339	115	109042
1	Q9TV62	Myosin-4 OS=Sus scrofa GN=MYH4 PE=2 SV=1	30936	287893	1373	1373	114	114	115048	1	1	0	498.043	1988.14	4	1988.16	-0.0119	1	17.98	0.021	R	TEELEEAKK	K				Cmpd 9121, AutoMSn(498.0433), 101.3 min (13229323981546858)	13A/AvB	0.216	16A/AvB	0.281	27A/AvB	0.254	29A/AvB	0.199	10B/AvB	0.327	21B/AvB	0.311	25B/AvB	0.17	37B/AvB	0.192	113	51000.7	114	33582.7	115	43838.1
1	Q9TV62	Myosin-4 OS=Sus scrofa GN=MYH4 PE=2 SV=1	30936	287893	1373	1373	114	114	115049	1	1	0	498.043	1988.14	4	1988.16	-0.0118	1	16.54	0.028	R	TEELEEAKK	K				Cmpd 9282, AutoMSn(498.0433), 104.3 min (13229323981761056)	13A/AvB	-0.073	16A/AvB	1.693	27A/AvB	0.031	29A/AvB	-0.001	10B/AvB	0.693	21B/AvB	0.014	25B/AvB	0	37B/AvB	0.293	113	48982.9	114	-5154.07	115	119700
1	Q9TV62	Myosin-4 OS=Sus scrofa GN=MYH4 PE=2 SV=1	30936	287893	1373	1373	114	114	115050	1	1	0	498.043	1988.14	4	1988.16	-0.0117	1	17.18	0.024	R	TEELEEAKK	K				Cmpd 9354, AutoMSn(498.0433), 105.1 min (13229323981761200)	13A/AvB	1.466	16A/AvB	-0.028	27A/AvB	0.33	29A/AvB	0.39	10B/AvB	0.375	21B/AvB	0.272	25B/AvB	-0.029	37B/AvB	0.381	113	12011.1	114	46949.5	115	-882.859
1	Q9TV62	Myosin-4 OS=Sus scrofa GN=MYH4 PE=2 SV=1	30936	287893	1373	1373	114	114	115051	1	1	0	498.043	1988.14	4	1988.16	-0.0115	1	19.11	0.016	R	TEELEEAKK	K				Cmpd 9212, AutoMSn(498.0433), 103.5 min (13229323981760916)	13A/AvB	-0.018	16A/AvB	0.887	27A/AvB	0.547	29A/AvB	-0.012	10B/AvB	0.703	21B/AvB	0.045	25B/AvB	-0.016	37B/AvB	0.267	113	40184.9	114	-1028.83	115	50642.4
1	Q9TV62	Myosin-4 OS=Sus scrofa GN=MYH4 PE=2 SV=1	30936	287893	1373	1373	114	114	115054	1	1	0	498.043	1988.14	4	1988.16	-0.0109	1	21.48	0.0097	R	TEELEEAKK	K				Cmpd 8884, AutoMSn(498.0435), 98.1 min (13229323981808461)	13A/AvB	0.194	16A/AvB	0.273	27A/AvB	0.237	29A/AvB	0.241	10B/AvB	0.281	21B/AvB	0.321	25B/AvB	0.165	37B/AvB	0.233	113	75866.8	114	52392.4	115	73822.2
1	Q9TV62	Myosin-4 OS=Sus scrofa GN=MYH4 PE=2 SV=1	30936	287893	1373	1373	114	114	115057	1	1	0	498.043	1988.15	4	1988.16	-0.0107	1	14.3	0.046	R	TEELEEAKK	K				Cmpd 9218, AutoMSn(498.0436), 103.7 min (13229323981711839)	13A/AvB	0.234	16A/AvB	0.257	27A/AvB	0.213	29A/AvB	0.266	10B/AvB	0.355	21B/AvB	0.353	25B/AvB	0.138	37B/AvB	0.154	113	19097.6	114	12563.4	115	13840.9
1	Q9TV62	Myosin-4 OS=Sus scrofa GN=MYH4 PE=2 SV=1	30936	287893	1373	1373	114	114	115058	1	1	0	498.044	1988.15	4	1988.16	-0.0106	1	19.93	0.017	R	TEELEEAKK	K				Cmpd 8955, AutoMSn(498.0436), 98.9 min (13229323981808603)	13A/AvB	0.249	16A/AvB	0.34	27A/AvB	0.234	29A/AvB	0.214	10B/AvB	0.284	21B/AvB	0.37	25B/AvB	0.138	37B/AvB	0.209	113	45425	114	39769.8	115	54375.8
1	Q9TV62	Myosin-4 OS=Sus scrofa GN=MYH4 PE=2 SV=1	30936	287893	1373	1373	114	114	115059	1	1	0	498.044	1988.15	4	1988.16	-0.0102	1	15.55	0.035	R	TEELEEAKK	K				Cmpd 9194, AutoMSn(498.0437), 102.1 min (13229323981547004)	13A/AvB	0.198	16A/AvB	0.246	27A/AvB	0.245	29A/AvB	0.214	10B/AvB	0.294	21B/AvB	0.303	25B/AvB	0.157	37B/AvB	0.246	113	49817	114	33508	115	41766.4
1	Q9TV62	Myosin-4 OS=Sus scrofa GN=MYH4 PE=2 SV=1	30936	287893	1373	1373	114	114	115062	1	1	0	663.722	1988.15	3	1988.16	-0.01	1	15.64	0.034	R	TEELEEAKK	K				Cmpd 8872, AutoMSn(663.7226), 97.9 min (13229323981808437)	13A/AvB	0.219	16A/AvB	0.235	27A/AvB	0.206	29A/AvB	0.23	10B/AvB	0.3	21B/AvB	0.293	25B/AvB	0.184	37B/AvB	0.223	113	31788.3	114	23215.6	115	24963.7
1	Q9TV62	Myosin-4 OS=Sus scrofa GN=MYH4 PE=2 SV=1	30936	287893	1373	1373	114	114	115065	1	1	0	498.044	1988.15	4	1988.16	-0.0093	1	24.82	0.0062	R	TEELEEAKK	K				Cmpd 9291, AutoMSn(498.0439), 104.5 min (13229323981711985)	13A/AvB	0.205	16A/AvB	0.252	27A/AvB	0.239	29A/AvB	0.227	10B/AvB	0.273	21B/AvB	0.294	25B/AvB	0.19	37B/AvB	0.243	113	18893.7	114	14193.8	115	17445
1	Q9TV62	Myosin-4 OS=Sus scrofa GN=MYH4 PE=2 SV=1	30936	287893	1373	1373	114	114	115330	1	1	0	669.681	2006.02	3	2006.03	-0.0079	0	30.34	0.0045	R	LQNEVEDLMLDVER	S				Cmpd 20596, AutoMSn(669.6812), 233.2 min (13229323981783684)	13A/AvB	-0.065	16A/AvB	0.628	27A/AvB	1.002	29A/AvB	-0.021	10B/AvB	0.708	21B/AvB	-0.048	25B/AvB	0.339	37B/AvB	0	113	653.133	114	-60.0896	115	578.852
1	Q9TV62	Myosin-4 OS=Sus scrofa GN=MYH4 PE=2 SV=1	30936	287893	1373	1373	114	114	115335	1	1	0	669.682	2006.02	3	2006.03	-0.0062	0	46.74	4.9e-05	R	LQNEVEDLMLDVER	S				Cmpd 21346, AutoMSn(669.6818), 240.2 min (13229323981571308)	13A/AvB	0.83	16A/AvB	-0.052	27A/AvB	-0.013	29A/AvB	-0.001	10B/AvB	-0.008	21B/AvB	-0.016	25B/AvB	0.432	37B/AvB	0.593	113	-10.9274	114	1079.61	115	-68.1016
1	Q9TV62	Myosin-4 OS=Sus scrofa GN=MYH4 PE=2 SV=1	30936	287893	1373	1373	114	114	115336	1	1	0	669.682	2006.02	3	2006.03	-0.006	0	60.65	4.3e-06	R	LQNEVEDLMLDVER	S				Cmpd 21180, AutoMSn(669.6819), 237.0 min (13229323981833053)	13A/AvB	0.216	16A/AvB	0.098	27A/AvB	-0.002	29A/AvB	0	10B/AvB	0.27	21B/AvB	0.489	25B/AvB	0.056	37B/AvB	0.185	113	1751.72	114	1401.39	115	639.174
1	Q9TV62	Myosin-4 OS=Sus scrofa GN=MYH4 PE=2 SV=1	30936	287893	1373	1373	114	114	115339	1	1	0	1004.02	2006.02	2	2006.03	-0.0057	0	17.11	0.025	R	LQNEVEDLMLDVER	S				Cmpd 21207, AutoMSn(1004.0193), 238.6 min (13229323981571030)	13A/AvB	0.108	16A/AvB	0.365	27A/AvB	0.234	29A/AvB	0.2	10B/AvB	0.322	21B/AvB	0.184	25B/AvB	0.252	37B/AvB	0.242	113	3348.22	114	1118.23	115	3795.54
1	Q9TV62	Myosin-4 OS=Sus scrofa GN=MYH4 PE=2 SV=1	30936	287893	1373	1373	114	114	115340	1	1	0	669.682	2006.02	3	2006.03	-0.0053	0	53.52	1.4e-05	R	LQNEVEDLMLDVER	S				Cmpd 21362, AutoMSn(669.6820), 239.0 min (13229323981833417)	13A/AvB	0.526	16A/AvB	0.487	27A/AvB	0.165	29A/AvB	0.193	10B/AvB	0.261	21B/AvB	0.391	25B/AvB	0.129	37B/AvB	0.218	113	1099.6	114	2212.6	115	2049.09
1	Q9TV62	Myosin-4 OS=Sus scrofa GN=MYH4 PE=2 SV=1	30936	287893	1373	1373	114	114	115342	1	1	0	1004.02	2006.02	2	2006.03	-0.0053	0	66.22	1.2e-06	R	LQNEVEDLMLDVER	S				Cmpd 21119, AutoMSn(1004.0195), 239.3 min (13229323981784730)	13A/AvB	-0.052	16A/AvB	0.857	27A/AvB	0.684	29A/AvB	-0.015	10B/AvB	0.47	21B/AvB	0.046	25B/AvB	-0.037	37B/AvB	0.521	113	4393.86	114	-487.392	115	8007.29
1	Q9TV62	Myosin-4 OS=Sus scrofa GN=MYH4 PE=2 SV=1	30936	287893	1373	1373	114	114	115343	1	1	0	1004.02	2006.02	2	2006.03	-0.0052	0	26.56	0.0047	R	LQNEVEDLMLDVER	S				Cmpd 20918, AutoMSn(1004.0196), 237.2 min (13229323981735237)	13A/AvB	0.403	16A/AvB	0.268	27A/AvB	0.189	29A/AvB	0.157	10B/AvB	0.157	21B/AvB	0.32	25B/AvB	0.259	37B/AvB	0.264	113	1112.37	114	2866.2	115	1903.93
1	Q9TV62	Myosin-4 OS=Sus scrofa GN=MYH4 PE=2 SV=1	30936	287893	1373	1373	114	114	115345	1	1	0	669.682	2006.02	3	2006.03	-0.0051	0	38.4	0.00025	R	LQNEVEDLMLDVER	S				Cmpd 20612, AutoMSn(669.6821), 233.4 min (13229323981783716)	13A/AvB	-0.07	16A/AvB	0.496	27A/AvB	-0.029	29A/AvB	0.36	10B/AvB	0.816	21B/AvB	-0.035	25B/AvB	0.219	37B/AvB	0	113	1342.83	114	-116.006	115	817.248
1	Q9TV62	Myosin-4 OS=Sus scrofa GN=MYH4 PE=2 SV=1	30936	287893	1373	1373	114	114	115346	1	1	0	669.682	2006.02	3	2006.03	-0.0051	0	75.01	1.6e-07	R	LQNEVEDLMLDVER	S				Cmpd 21049, AutoMSn(669.6821), 238.4 min (13229323981784590)	13A/AvB	-0.032	16A/AvB	0.001	27A/AvB	0.38	29A/AvB	-0.009	10B/AvB	0.426	21B/AvB	-0.012	25B/AvB	0.29	37B/AvB	0.296	113	1297.41	114	-96.1865	115	3.29666
1	Q9TV62	Myosin-4 OS=Sus scrofa GN=MYH4 PE=2 SV=1	30936	287893	1373	1373	114	114	115347	1	1	0	669.682	2006.02	3	2006.03	-0.0051	0	62.84	2.7e-06	R	LQNEVEDLMLDVER	S				Cmpd 21048, AutoMSn(669.6821), 238.4 min (13229323981784588)	13A/AvB	-0.045	16A/AvB	0.604	27A/AvB	-0.011	29A/AvB	0	10B/AvB	0.439	21B/AvB	-0.047	25B/AvB	0.37	37B/AvB	0.238	113	819.193	114	-83.463	115	1126.5
1	Q9TV62	Myosin-4 OS=Sus scrofa GN=MYH4 PE=2 SV=1	30936	287893	1373	1373	114	114	115348	1	1	0	1004.02	2006.02	2	2006.03	-0.005	0	55.97	1.3e-05	R	LQNEVEDLMLDVER	S				Cmpd 21047, AutoMSn(1004.0196), 238.4 min (13229323981784586)	13A/AvB	-0.028	16A/AvB	0.16	27A/AvB	0.419	29A/AvB	0.015	10B/AvB	0.334	21B/AvB	0.467	25B/AvB	-0.041	37B/AvB	0.24	113	4864.68	114	-407.365	115	2323.04
1	Q9TV62	Myosin-4 OS=Sus scrofa GN=MYH4 PE=2 SV=1	30936	287893	1373	1373	114	114	115350	1	1	0	1004.02	2006.02	2	2006.03	-0.0048	0	67.75	8.5e-07	R	LQNEVEDLMLDVER	S				Cmpd 21198, AutoMSn(1004.0197), 238.1 min (13229323981881750)	13A/AvB	0.16	16A/AvB	0.158	27A/AvB	0.138	29A/AvB	0.189	10B/AvB	0.215	21B/AvB	0.287	25B/AvB	0.218	37B/AvB	0.279	113	4031.2	114	3002.79	115	2960.4
1	Q9TV62	Myosin-4 OS=Sus scrofa GN=MYH4 PE=2 SV=1	30936	287893	1373	1373	114	114	115353	1	1	0	669.682	2006.03	3	2006.03	-0.0046	0	58.71	6.9e-06	R	LQNEVEDLMLDVER	S				Cmpd 21127, AutoMSn(669.6823), 239.3 min (13229323981784746)	13A/AvB	-0.062	16A/AvB	0.754	27A/AvB	0.28	29A/AvB	-0.007	10B/AvB	0.633	21B/AvB	-0.039	25B/AvB	-0.013	37B/AvB	0.419	113	948.503	114	-93.0841	115	1128.53
1	Q9TV62	Myosin-4 OS=Sus scrofa GN=MYH4 PE=2 SV=1	30936	287893	1373	1373	114	114	115354	1	1	0	1004.02	2006.03	2	2006.03	-0.0044	0	68.69	6.9e-07	R	LQNEVEDLMLDVER	S				Cmpd 21265, AutoMSn(1004.0199), 239.2 min (13229323981571146)	13A/AvB	0.269	16A/AvB	0.248	27A/AvB	0.195	29A/AvB	0.201	10B/AvB	0.253	21B/AvB	0.306	25B/AvB	0.189	37B/AvB	0.252	113	8745.95	114	9322.88	115	8570.29
1	Q9TV62	Myosin-4 OS=Sus scrofa GN=MYH4 PE=2 SV=1	30936	287893	1373	1373	114	114	115355	1	1	0	669.682	2006.03	3	2006.03	-0.0044	0	65.66	1.4e-06	R	LQNEVEDLMLDVER	S				Cmpd 21215, AutoMSn(669.6824), 237.4 min (13229323981833123)	13A/AvB	0.29	16A/AvB	0.307	27A/AvB	0.273	29A/AvB	0.172	10B/AvB	0.319	21B/AvB	0.217	25B/AvB	0.164	37B/AvB	0.3	113	3478.27	114	3162.72	115	3351.76
1	Q9TV62	Myosin-4 OS=Sus scrofa GN=MYH4 PE=2 SV=1	30936	287893	1373	1373	114	114	115356	1	1	0	1004.02	2006.03	2	2006.03	-0.0041	0	28.94	0.0065	R	LQNEVEDLMLDVER	S				Cmpd 20849, AutoMSn(1004.0201), 233.2 min (13229323981832391)	13A/AvB	0.155	16A/AvB	0.242	27A/AvB	0.309	29A/AvB	0.157	10B/AvB	0.401	21B/AvB	0.305	25B/AvB	0.069	37B/AvB	0.225	113	4101.51	114	1588.14	115	2470.08
1	Q9TV62	Myosin-4 OS=Sus scrofa GN=MYH4 PE=2 SV=1	30936	287893	1373	1373	114	114	115357	1	1	0	1004.02	2006.03	2	2006.03	-0.0041	0	76.75	1.1e-07	R	LQNEVEDLMLDVER	S				Cmpd 21317, AutoMSn(1004.0201), 238.5 min (13229323981833327)	13A/AvB	0.234	16A/AvB	0.254	27A/AvB	0.266	29A/AvB	0.183	10B/AvB	0.259	21B/AvB	0.313	25B/AvB	0.151	37B/AvB	0.276	113	9596.85	114	8660.18	115	9404.6
1	Q9TV62	Myosin-4 OS=Sus scrofa GN=MYH4 PE=2 SV=1	30936	287893	1373	1373	114	114	115358	1	1	0	1004.02	2006.03	2	2006.03	-0.0039	0	66.07	1.3e-06	R	LQNEVEDLMLDVER	S				Cmpd 20966, AutoMSn(1004.0201), 237.7 min (13229323981735333)	13A/AvB	0.117	16A/AvB	0.382	27A/AvB	0.237	29A/AvB	0.225	10B/AvB	0.245	21B/AvB	0.281	25B/AvB	0.212	37B/AvB	0.262	113	4605.6	114	2210.23	115	7189.4
1	Q9TV62	Myosin-4 OS=Sus scrofa GN=MYH4 PE=2 SV=1	30936	287893	1373	1373	114	114	115359	1	1	0	669.683	2006.03	3	2006.03	-0.0038	0	95.7	1.4e-09	R	LQNEVEDLMLDVER	S				Cmpd 21287, AutoMSn(669.6825), 238.2 min (13229323981833267)	13A/AvB	0.247	16A/AvB	0.229	27A/AvB	0.256	29A/AvB	0.229	10B/AvB	0.3	21B/AvB	0.305	25B/AvB	0.167	37B/AvB	0.227	113	4126.26	114	3398.31	115	3152.64
1	Q9TV62	Myosin-4 OS=Sus scrofa GN=MYH4 PE=2 SV=1	30936	287893	1373	1373	114	114	115361	1	1	0	1004.02	2006.03	2	2006.03	-0.0038	0	49.25	6.1e-05	R	LQNEVEDLMLDVER	S				Cmpd 21038, AutoMSn(1004.0202), 238.6 min (13229323981735477)	13A/AvB	0.177	16A/AvB	0.293	27A/AvB	0.255	29A/AvB	0.27	10B/AvB	0.21	21B/AvB	0.226	25B/AvB	0.214	37B/AvB	0.35	113	2538.93	114	2138	115	3549.24
1	Q9TV62	Myosin-4 OS=Sus scrofa GN=MYH4 PE=2 SV=1	30936	287893	1373	1373	114	114	115364	1	1	0	1004.02	2006.03	2	2006.03	-0.0037	0	93.92	2.1e-09	R	LQNEVEDLMLDVER	S				Cmpd 21245, AutoMSn(1004.0203), 237.7 min (13229323981833183)	13A/AvB	0.22	16A/AvB	0.187	27A/AvB	0.17	29A/AvB	0.239	10B/AvB	0.277	21B/AvB	0.285	25B/AvB	0.154	37B/AvB	0.284	113	16386.1	114	13003.9	115	11032.1
1	Q9TV62	Myosin-4 OS=Sus scrofa GN=MYH4 PE=2 SV=1	30936	287893	1373	1373	114	114	115365	1	1	0	669.683	2006.03	3	2006.03	-0.0037	0	78.15	7.8e-08	R	LQNEVEDLMLDVER	S				Cmpd 21156, AutoMSn(669.6826), 237.6 min (13229323981881666)	13A/AvB	0.17	16A/AvB	0.394	27A/AvB	0.269	29A/AvB	0.244	10B/AvB	0.339	21B/AvB	0.213	25B/AvB	0.178	37B/AvB	0.27	113	3492.53	114	1753.84	115	4058.27
1	Q9TV62	Myosin-4 OS=Sus scrofa GN=MYH4 PE=2 SV=1	30936	287893	1373	1373	114	114	115366	1	1	0	669.683	2006.03	3	2006.03	-0.0035	0	62.29	2.8e-06	R	LQNEVEDLMLDVER	S				Cmpd 20753, AutoMSn(669.6827), 232.1 min (13229323981832199)	13A/AvB	0.213	16A/AvB	0.342	27A/AvB	0.309	29A/AvB	0.178	10B/AvB	0.382	21B/AvB	0.31	25B/AvB	-0.029	37B/AvB	0.338	113	2644.71	114	1474.41	115	2371.39
1	Q9TV62	Myosin-4 OS=Sus scrofa GN=MYH4 PE=2 SV=1	30936	287893	1373	1373	114	114	115367	1	1	0	669.683	2006.03	3	2006.03	-0.0035	0	47.65	3.6e-05	R	LQNEVEDLMLDVER	S				Cmpd 20671, AutoMSn(669.6827), 232.2 min (13229323981880696)	13A/AvB	0.285	16A/AvB	0.537	27A/AvB	0.586	29A/AvB	0.226	10B/AvB	0.482	21B/AvB	0.201	25B/AvB	0.146	37B/AvB	0.171	113	2421.16	114	1432.79	115	2696.3
1	Q9TV62	Myosin-4 OS=Sus scrofa GN=MYH4 PE=2 SV=1	30936	287893	1373	1373	114	114	115368	1	1	0	1004.02	2006.03	2	2006.03	-0.0035	0	86.49	1.1e-08	R	LQNEVEDLMLDVER	S				Cmpd 21249, AutoMSn(1004.0204), 239.1 min (13229323981571114)	13A/AvB	0.238	16A/AvB	0.209	27A/AvB	0.216	29A/AvB	0.213	10B/AvB	0.236	21B/AvB	0.318	25B/AvB	0.181	37B/AvB	0.264	113	7022.03	114	7089.59	115	6216.24
1	Q9TV62	Myosin-4 OS=Sus scrofa GN=MYH4 PE=2 SV=1	30936	287893	1373	1373	114	114	115369	1	1	0	1004.02	2006.03	2	2006.03	-0.0035	0	93.84	2.1e-09	R	LQNEVEDLMLDVER	S				Cmpd 21321, AutoMSn(1004.0204), 239.9 min (13229323981571258)	13A/AvB	0.21	16A/AvB	0.259	27A/AvB	0.174	29A/AvB	0.203	10B/AvB	0.243	21B/AvB	0.354	25B/AvB	0.163	37B/AvB	0.24	113	9606.84	114	8311.7	115	10223.8
1	Q9TV62	Myosin-4 OS=Sus scrofa GN=MYH4 PE=2 SV=1	30936	287893	1373	1373	114	114	115370	1	1	0	1004.02	2006.03	2	2006.03	-0.0033	0	79.72	5.5e-08	R	LQNEVEDLMLDVER	S				Cmpd 21054, AutoMSn(1004.0204), 236.5 min (13229323981881462)	13A/AvB	0.229	16A/AvB	0.222	27A/AvB	0.196	29A/AvB	0.288	10B/AvB	0.257	21B/AvB	0.277	25B/AvB	0.195	37B/AvB	0.271	113	5354.95	114	4771.9	115	4636.93
1	Q9TV62	Myosin-4 OS=Sus scrofa GN=MYH4 PE=2 SV=1	30936	287893	1373	1373	114	114	115371	1	1	0	1004.02	2006.03	2	2006.03	-0.0032	0	34.2	0.0021	R	LQNEVEDLMLDVER	S				Cmpd 20757, AutoMSn(1004.0205), 233.5 min (13229323981570130)	13A/AvB	0.137	16A/AvB	0.235	27A/AvB	0.26	29A/AvB	0.047	10B/AvB	0.247	21B/AvB	0.241	25B/AvB	0.234	37B/AvB	0.279	113	2362.08	114	1312.82	115	2251.48
1	Q9TV62	Myosin-4 OS=Sus scrofa GN=MYH4 PE=2 SV=1	30936	287893	1373	1373	114	114	115372	1	1	0	1004.02	2006.03	2	2006.03	-0.0032	0	61.76	3.7e-06	R	LQNEVEDLMLDVER	S				Cmpd 20829, AutoMSn(1004.0205), 234.3 min (13229323981570274)	13A/AvB	0.081	16A/AvB	0.306	27A/AvB	0.218	29A/AvB	0.196	10B/AvB	0.21	21B/AvB	0.43	25B/AvB	0.164	37B/AvB	0.196	113	2743.7	114	1055.72	115	3996.73
1	Q9TV62	Myosin-4 OS=Sus scrofa GN=MYH4 PE=2 SV=1	30936	287893	1373	1373	114	114	115373	1	1	0	1004.02	2006.03	2	2006.03	-0.0032	0	93.97	2.2e-09	R	LQNEVEDLMLDVER	S				Cmpd 21126, AutoMSn(1004.0205), 237.3 min (13229323981881606)	13A/AvB	0.223	16A/AvB	0.236	27A/AvB	0.233	29A/AvB	0.248	10B/AvB	0.25	21B/AvB	0.309	25B/AvB	0.174	37B/AvB	0.268	113	13477.8	114	12034.9	115	12706.3
1	Q9TV62	Myosin-4 OS=Sus scrofa GN=MYH4 PE=2 SV=1	30936	287893	1373	1373	114	114	115374	1	1	0	669.683	2006.03	3	2006.03	-0.0031	0	75.89	1.4e-07	R	LQNEVEDLMLDVER	S				Cmpd 21084, AutoMSn(669.6828), 236.8 min (13229323981881522)	13A/AvB	0.256	16A/AvB	0.273	27A/AvB	0.223	29A/AvB	0.124	10B/AvB	0.312	21B/AvB	0.282	25B/AvB	0.214	37B/AvB	0.193	113	2990.12	114	2454.52	115	2620.9
1	Q9TV62	Myosin-4 OS=Sus scrofa GN=MYH4 PE=2 SV=1	30936	287893	1373	1373	114	114	115376	1	1	0	1004.02	2006.03	2	2006.03	-0.0028	0	58.61	7.7e-06	R	LQNEVEDLMLDVER	S				Cmpd 21191, AutoMSn(1004.0207), 237.1 min (13229323981833075)	13A/AvB	0.195	16A/AvB	0.244	27A/AvB	0.244	29A/AvB	0.185	10B/AvB	0.294	21B/AvB	0.348	25B/AvB	0.154	37B/AvB	0.204	113	7134.18	114	4732.37	115	5922.75
1	Q9TV62	Myosin-4 OS=Sus scrofa GN=MYH4 PE=2 SV=1	30936	287893	1373	1373	114	114	115377	1	1	0	1004.02	2006.03	2	2006.03	-0.0028	0	77.33	1e-07	R	LQNEVEDLMLDVER	S				Cmpd 21238, AutoMSn(1004.0207), 237.6 min (13229323981833169)	13A/AvB	0.171	16A/AvB	0.234	27A/AvB	0.188	29A/AvB	0.19	10B/AvB	0.241	21B/AvB	0.326	25B/AvB	0.134	37B/AvB	0.299	113	12827.1	114	9095.29	115	12425.1
1	Q9TV62	Myosin-4 OS=Sus scrofa GN=MYH4 PE=2 SV=1	30936	287893	1373	1373	114	114	115378	1	1	0	669.683	2006.03	3	2006.03	-0.0027	0	52.49	1.5e-05	R	LQNEVEDLMLDVER	S				Cmpd 21273, AutoMSn(669.6829), 239.4 min (13229323981571162)	13A/AvB	-0.038	16A/AvB	0.001	27A/AvB	0	29A/AvB	-0.001	10B/AvB	0.517	21B/AvB	0	25B/AvB	0	37B/AvB	0.483	113	536.636	114	-39.7802	115	1.1371
1	Q9TV62	Myosin-4 OS=Sus scrofa GN=MYH4 PE=2 SV=1	30936	287893	1373	1373	114	114	115379	1	1	0	669.683	2006.03	3	2006.03	-0.0027	0	63.9	1.9e-06	R	LQNEVEDLMLDVER	S				Cmpd 20825, AutoMSn(669.6829), 232.9 min (13229323981832343)	13A/AvB	0.154	16A/AvB	0.318	27A/AvB	0.119	29A/AvB	0.168	10B/AvB	0.417	21B/AvB	0.303	25B/AvB	0.204	37B/AvB	0.075	113	3295.49	114	1221.19	115	2512.23
1	Q9TV62	Myosin-4 OS=Sus scrofa GN=MYH4 PE=2 SV=1	30936	287893	1373	1373	114	114	115381	1	1	0	669.683	2006.03	3	2006.03	-0.0026	0	56.46	9.7e-06	R	LQNEVEDLMLDVER	S				Cmpd 21120, AutoMSn(669.6830), 239.3 min (13229323981784732)	13A/AvB	-0.064	16A/AvB	0.605	27A/AvB	-0.031	29A/AvB	0.509	10B/AvB	0.704	21B/AvB	-0.032	25B/AvB	0.001	37B/AvB	0.326	113	980.772	114	-89.685	115	842.119
1	Q9TV62	Myosin-4 OS=Sus scrofa GN=MYH4 PE=2 SV=1	30936	287893	1373	1373	114	114	115383	1	1	0	1004.02	2006.03	2	2006.03	-0.0024	0	58.75	7.5e-06	R	LQNEVEDLMLDVER	S				Cmpd 20777, AutoMSn(1004.0210), 232.4 min (13229323981832247)	13A/AvB	0.131	16A/AvB	0.27	27A/AvB	0.139	29A/AvB	0.16	10B/AvB	0.253	21B/AvB	0.28	25B/AvB	0.262	37B/AvB	0.204	113	4550.33	114	2351.92	115	4850.9
1	Q9TV62	Myosin-4 OS=Sus scrofa GN=MYH4 PE=2 SV=1	30936	287893	1373	1373	114	114	115384	1	1	0	1004.02	2006.03	2	2006.03	-0.0022	0	40.13	0.00054	R	LQNEVEDLMLDVER	S				Cmpd 20628, AutoMSn(1004.0210), 231.7 min (13229323981880610)	13A/AvB	0.185	16A/AvB	0.223	27A/AvB	0.29	29A/AvB	0.118	10B/AvB	0.247	21B/AvB	0.304	25B/AvB	0.223	37B/AvB	0.226	113	3086.33	114	2310.79	115	2782.96
1	Q9TV62	Myosin-4 OS=Sus scrofa GN=MYH4 PE=2 SV=1	30936	287893	1373	1373	114	114	115385	1	1	0	1004.02	2006.03	2	2006.03	-0.0021	0	16.53	0.03	R	LQNEVEDLMLDVER	S				Cmpd 21394, AutoMSn(1004.0211), 240.7 min (13229323981571404)	13A/AvB	0.215	16A/AvB	0.447	27A/AvB	0.153	29A/AvB	0.303	10B/AvB	0.276	21B/AvB	0.266	25B/AvB	0.201	37B/AvB	0.257	113	1581.14	114	1233.22	115	2562.05
1	Q9TV62	Myosin-4 OS=Sus scrofa GN=MYH4 PE=2 SV=1	30936	287893	1373	1373	114	114	115390	1	1	0	1004.02	2006.03	2	2006.03	-0.0003	0	32.18	0.0033	R	LQNEVEDLMLDVER	S				Cmpd 20540, AutoMSn(1004.0220), 232.9 min (13229323981734481)	13A/AvB	-0.014	16A/AvB	0.134	27A/AvB	0.076	29A/AvB	0.096	10B/AvB	0.147	21B/AvB	0.347	25B/AvB	0.371	37B/AvB	0.134	113	814.804	114	-75.3236	115	739.948
1	Q9TV62	Myosin-4 OS=Sus scrofa GN=MYH4 PE=2 SV=1	30936	287893	1373	1373	114	114	115391	1	1	0	669.684	2006.03	3	2006.03	0.0011	0	53.47	1.8e-05	R	LQNEVEDLMLDVER	S				Cmpd 20598, AutoMSn(669.6842), 231.3 min (13229323981880550)	13A/AvB	0.153	16A/AvB	0.228	27A/AvB	0.05	29A/AvB	0.314	10B/AvB	0.315	21B/AvB	0.357	25B/AvB	0.182	37B/AvB	0.146	113	2704.49	114	1312.75	115	1957.42
1	Q9TV62	Myosin-4 OS=Sus scrofa GN=MYH4 PE=2 SV=1	30936	287893	1373	1373	114	114	115588	1	1	0	675.013	2022.02	3	2022.02	-0.0061	0	20.43	0.012	R	LQNEVEDLMLDVER	S	Oxidation (M)	0.00000000200000.0		Cmpd 16974, AutoMSn(675.0134), 191.9 min (13229323981776440)	13A/AvB	-0.024	16A/AvB	0.298	27A/AvB	0	29A/AvB	-0.001	10B/AvB	0.246	21B/AvB	0.572	25B/AvB	-0.024	37B/AvB	0.205	113	1237.37	114	-121.873	115	1494.01
1	Q9TV62	Myosin-4 OS=Sus scrofa GN=MYH4 PE=2 SV=1	30936	287893	1373	1373	114	114	115589	1	1	0	675.014	2022.02	3	2022.02	-0.006	0	83.94	2.2e-08	R	LQNEVEDLMLDVER	S	Oxidation (M)	0.00000000200000.0		Cmpd 17015, AutoMSn(675.0135), 192.4 min (13229323981776522)	13A/AvB	-0.039	16A/AvB	0.316	27A/AvB	-0.023	29A/AvB	0.178	10B/AvB	0.44	21B/AvB	-0.032	25B/AvB	0.39	37B/AvB	0.202	113	2358.1	114	-208.921	115	1692.75
1	Q9TV62	Myosin-4 OS=Sus scrofa GN=MYH4 PE=2 SV=1	30936	287893	1373	1373	114	114	115590	1	1	0	1012.02	2022.02	2	2022.02	-0.0059	0	34.67	0.0019	R	LQNEVEDLMLDVER	S	Oxidation (M)	0.00000000200000.0		Cmpd 16680, AutoMSn(1012.0166), 188.5 min (13229323981775852)	13A/AvB	-0.04	16A/AvB	-0.007	27A/AvB	0.254	29A/AvB	-0.006	10B/AvB	0.544	21B/AvB	0.261	25B/AvB	0.023	37B/AvB	0.172	113	8689.6	114	-641.587	115	-108.396
1	Q9TV62	Myosin-4 OS=Sus scrofa GN=MYH4 PE=2 SV=1	30936	287893	1373	1373	114	114	115592	1	1	0	675.014	2022.02	3	2022.02	-0.0058	0	51.85	1.7e-05	R	LQNEVEDLMLDVER	S	Oxidation (M)	0.00000000200000.0		Cmpd 16506, AutoMSn(675.0136), 184.8 min (13229323981872366)	13A/AvB	0.148	16A/AvB	0.206	27A/AvB	0.142	29A/AvB	0.138	10B/AvB	0.402	21B/AvB	0.328	25B/AvB	0.121	37B/AvB	0.149	113	8749.55	114	3222.38	115	4486.25
1	Q9TV62	Myosin-4 OS=Sus scrofa GN=MYH4 PE=2 SV=1	30936	287893	1373	1373	114	114	115594	1	1	0	675.014	2022.02	3	2022.02	-0.0056	0	38.85	0.00023	R	LQNEVEDLMLDVER	S	Oxidation (M)	0.00000000200000.0		Cmpd 16738, AutoMSn(675.0136), 187.6 min (13229323981562092)	13A/AvB	0.097	16A/AvB	0.475	27A/AvB	0.381	29A/AvB	0.385	10B/AvB	0.495	21B/AvB	0.205	25B/AvB	0.114	37B/AvB	0.187	113	3802.1	114	743.472	115	3649.25
1	Q9TV62	Myosin-4 OS=Sus scrofa GN=MYH4 PE=2 SV=1	30936	287893	1373	1373	114	114	115598	1	1	0	675.014	2022.02	3	2022.02	-0.0054	0	34.32	0.0016	R	LQNEVEDLMLDVER	S	Oxidation (M)	0.00000000200000.0		Cmpd 16640, AutoMSn(675.0137), 188.3 min (13229323981726683)	13A/AvB	-0.033	16A/AvB	0.333	27A/AvB	-0.028	29A/AvB	0.351	10B/AvB	0.36	21B/AvB	0.419	25B/AvB	0.221	37B/AvB	0	113	747.984	114	-69.4266	115	693.119
1	Q9TV62	Myosin-4 OS=Sus scrofa GN=MYH4 PE=2 SV=1	30936	287893	1373	1373	114	114	115600	1	1	0	675.014	2022.02	3	2022.02	-0.0054	0	46.3	6e-05	R	LQNEVEDLMLDVER	S	Oxidation (M)	0.00000000200000.0		Cmpd 16903, AutoMSn(675.0137), 191.1 min (13229323981776298)	13A/AvB	-0.077	16A/AvB	0.634	27A/AvB	0.109	29A/AvB	-0.003	10B/AvB	0.866	21B/AvB	-0.035	25B/AvB	0.052	37B/AvB	0.117	113	7052.75	114	-626.841	115	5161.01
1	Q9TV62	Myosin-4 OS=Sus scrofa GN=MYH4 PE=2 SV=1	30936	287893	1373	1373	114	114	115603	1	1	0	675.014	2022.02	3	2022.02	-0.0052	0	46.21	8.2e-05	R	LQNEVEDLMLDVER	S	Oxidation (M)	0.00000000200000.0		Cmpd 16535, AutoMSn(675.0137), 186.9 min (13229323981775562)	13A/AvB	0.621	16A/AvB	-0.058	27A/AvB	0.71	29A/AvB	-0.015	10B/AvB	0.221	21B/AvB	0.609	25B/AvB	-0.061	37B/AvB	0.231	113	1356.89	114	3814.24	115	-358.17
1	Q9TV62	Myosin-4 OS=Sus scrofa GN=MYH4 PE=2 SV=1	30936	287893	1373	1373	114	114	115605	1	1	0	1012.02	2022.02	2	2022.02	-0.0052	0	39.11	0.00068	R	LQNEVEDLMLDVER	S	Oxidation (M)	0.00000000200000.0		Cmpd 16507, AutoMSn(1012.0170), 184.8 min (13229323981872368)	13A/AvB	0.199	16A/AvB	0.206	27A/AvB	0.19	29A/AvB	0.216	10B/AvB	0.269	21B/AvB	0.352	25B/AvB	0.207	37B/AvB	0.172	113	4523	114	3349.84	115	3458.37
1	Q9TV62	Myosin-4 OS=Sus scrofa GN=MYH4 PE=2 SV=1	30936	287893	1373	1373	114	114	115606	1	1	0	675.014	2022.02	3	2022.02	-0.005	0	39.93	0.00018	R	LQNEVEDLMLDVER	S	Oxidation (M)	0.00000000200000.0		Cmpd 17071, AutoMSn(675.0138), 191.3 min (13229323981562758)	13A/AvB	0.07	16A/AvB	0.075	27A/AvB	0.166	29A/AvB	0.162	10B/AvB	0.741	21B/AvB	0.089	25B/AvB	0.076	37B/AvB	0.094	113	12091.4	114	1139.62	115	1226.26
1	Q9TV62	Myosin-4 OS=Sus scrofa GN=MYH4 PE=2 SV=1	30936	287893	1373	1373	114	114	115607	1	1	0	675.014	2022.02	3	2022.02	-0.005	0	44.56	6.6e-05	R	LQNEVEDLMLDVER	S	Oxidation (M)	0.00000000200000.0		Cmpd 17107, AutoMSn(675.0138), 191.6 min (13229323981873568)	13A/AvB	0.067	16A/AvB	0.189	27A/AvB	0.166	29A/AvB	0.131	10B/AvB	0.419	21B/AvB	0.239	25B/AvB	0.19	37B/AvB	0.152	113	7123.12	114	1144.86	115	3218.1
1	Q9TV62	Myosin-4 OS=Sus scrofa GN=MYH4 PE=2 SV=1	30936	287893	1373	1373	114	114	115611	1	1	0	675.014	2022.02	3	2022.02	-0.0049	0	72.19	3.5e-07	R	LQNEVEDLMLDVER	S	Oxidation (M)	0.00000000200000.0		Cmpd 17087, AutoMSn(675.0139), 193.2 min (13229323981776666)	13A/AvB	1.998	16A/AvB	-0.139	27A/AvB	1.653	29A/AvB	-0.034	10B/AvB	0.734	21B/AvB	0.365	25B/AvB	-0.099	37B/AvB	0	113	2062.24	114	5616.43	115	-392.064
1	Q9TV62	Myosin-4 OS=Sus scrofa GN=MYH4 PE=2 SV=1	30936	287893	1373	1373	114	114	115612	1	1	0	675.014	2022.02	3	2022.02	-0.0049	0	60.46	5.2e-06	R	LQNEVEDLMLDVER	S	Oxidation (M)	0.00000000200000.0		Cmpd 16757, AutoMSn(675.0138), 189.4 min (13229323981776006)	13A/AvB	-0.08	16A/AvB	1.582	27A/AvB	0	29A/AvB	-0.001	10B/AvB	0.642	21B/AvB	-0.083	25B/AvB	0.002	37B/AvB	0.439	113	3594.47	114	-445.326	115	8856.06
1	Q9TV62	Myosin-4 OS=Sus scrofa GN=MYH4 PE=2 SV=1	30936	287893	1373	1373	114	114	115615	1	1	0	1012.02	2022.02	2	2022.02	-0.0047	0	29.01	0.0072	R	LQNEVEDLMLDVER	S	Oxidation (M)	0.00000000200000.0		Cmpd 16997, AutoMSn(1012.0172), 192.2 min (13229323981776486)	13A/AvB	-0.013	16A/AvB	-0.017	27A/AvB	0	29A/AvB	0	10B/AvB	0.344	21B/AvB	0.559	25B/AvB	-0.023	37B/AvB	0.121	113	14111	114	-523.79	115	-698.205
1	Q9TV62	Myosin-4 OS=Sus scrofa GN=MYH4 PE=2 SV=1	30936	287893	1373	1373	114	114	115616	1	1	0	675.014	2022.02	3	2022.02	-0.0047	0	17.91	0.021	R	LQNEVEDLMLDVER	S	Oxidation (M)	0.00000000200000.0		Cmpd 17165, AutoMSn(675.0139), 192.4 min (13229323981562946)	13A/AvB	0.112	16A/AvB	0.158	27A/AvB	0.054	29A/AvB	0.166	10B/AvB	0.39	21B/AvB	0.178	25B/AvB	0.126	37B/AvB	0.306	113	2997.64	114	860.939	115	1212.22
1	Q9TV62	Myosin-4 OS=Sus scrofa GN=MYH4 PE=2 SV=1	30936	287893	1373	1373	114	114	115617	1	1	0	675.014	2022.02	3	2022.02	-0.0047	0	55.02	1.4e-05	R	LQNEVEDLMLDVER	S	Oxidation (M)	0.00000000200000.0		Cmpd 16686, AutoMSn(675.0139), 188.6 min (13229323981775864)	13A/AvB	-0.045	16A/AvB	0.319	27A/AvB	0.374	29A/AvB	-0.008	10B/AvB	0.527	21B/AvB	0.514	25B/AvB	-0.041	37B/AvB	0	113	2950.79	114	-254.755	115	1787.91
1	Q9TV62	Myosin-4 OS=Sus scrofa GN=MYH4 PE=2 SV=1	30936	287893	1373	1373	114	114	115618	1	1	0	1012.02	2022.02	2	2022.02	-0.0046	0	42.76	0.0003	R	LQNEVEDLMLDVER	S	Oxidation (M)	0.00000000200000.0		Cmpd 17024, AutoMSn(1012.0173), 192.7 min (13229323981727451)	13A/AvB	0.269	16A/AvB	0.222	27A/AvB	0.274	29A/AvB	0.192	10B/AvB	0.206	21B/AvB	0.241	25B/AvB	0.23	37B/AvB	0.322	113	3396.49	114	4433.74	115	3649.07
1	Q9TV62	Myosin-4 OS=Sus scrofa GN=MYH4 PE=2 SV=1	30936	287893	1373	1373	114	114	115619	1	1	0	1012.02	2022.02	2	2022.02	-0.0046	0	33.78	0.0024	R	LQNEVEDLMLDVER	S	Oxidation (M)	0.00000000200000.0		Cmpd 16790, AutoMSn(1012.0173), 190.0 min (13229323981726983)	13A/AvB	0.28	16A/AvB	0.227	27A/AvB	0.245	29A/AvB	0.146	10B/AvB	0.211	21B/AvB	0.346	25B/AvB	0.231	37B/AvB	0.212	113	4107.67	114	5447.48	115	4405.58
1	Q9TV62	Myosin-4 OS=Sus scrofa GN=MYH4 PE=2 SV=1	30936	287893	1373	1373	114	114	115620	1	1	0	675.014	2022.02	3	2022.02	-0.0045	0	14.41	0.044	R	LQNEVEDLMLDVER	S	Oxidation (M)	0.00000000200000.0		Cmpd 13888, AutoMSn(675.0140), 156.7 min (13229323981770268)	13A/AvB	-0.049	16A/AvB	0.089	27A/AvB	0.311	29A/AvB	-0.007	10B/AvB	0.642	21B/AvB	0.234	25B/AvB	-0.026	37B/AvB	0.15	113	4323.38	114	-332.391	115	598.013
1	Q9TV62	Myosin-4 OS=Sus scrofa GN=MYH4 PE=2 SV=1	30936	287893	1373	1373	114	114	115621	1	1	0	675.014	2022.02	3	2022.02	-0.0045	0	59.05	7.2e-06	R	LQNEVEDLMLDVER	S	Oxidation (M)	0.00000000200000.0		Cmpd 17280, AutoMSn(675.0140), 192.5 min (13229323981825253)	13A/AvB	0.146	16A/AvB	0.262	27A/AvB	0.116	29A/AvB	0.145	10B/AvB	0.328	21B/AvB	0.255	25B/AvB	0.213	37B/AvB	0.204	113	7651.58	114	3402.03	115	6112.46
1	Q9TV62	Myosin-4 OS=Sus scrofa GN=MYH4 PE=2 SV=1	30936	287893	1373	1373	114	114	115622	1	1	0	675.014	2022.02	3	2022.02	-0.0045	0	38.54	0.00031	R	LQNEVEDLMLDVER	S	Oxidation (M)	0.00000000200000.0		Cmpd 16926, AutoMSn(675.0139), 189.6 min (13229323981873206)	13A/AvB	0.158	16A/AvB	0.163	27A/AvB	0.224	29A/AvB	0.22	10B/AvB	0.44	21B/AvB	0.344	25B/AvB	0.12	37B/AvB	0.097	113	10027.2	114	3592.74	115	3717.19
1	Q9TV62	Myosin-4 OS=Sus scrofa GN=MYH4 PE=2 SV=1	30936	287893	1373	1373	114	114	115626	1	1	0	675.014	2022.02	3	2022.02	-0.0043	0	41.2	0.00018	R	LQNEVEDLMLDVER	S	Oxidation (M)	0.00000000200000.0		Cmpd 16402, AutoMSn(675.0141), 185.6 min (13229323981726207)	13A/AvB	0.535	16A/AvB	0.3	27A/AvB	0.116	29A/AvB	0.12	10B/AvB	0.33	21B/AvB	0.208	25B/AvB	0.095	37B/AvB	0.368	113	1110.21	114	1802.74	115	1008.46
1	Q9TV62	Myosin-4 OS=Sus scrofa GN=MYH4 PE=2 SV=1	30936	287893	1373	1373	114	114	115627	1	1	0	675.014	2022.02	3	2022.02	-0.0043	0	62.32	3.4e-06	R	LQNEVEDLMLDVER	S	Oxidation (M)	0.00000000200000.0		Cmpd 17218, AutoMSn(675.0140), 193.0 min (13229323981563052)	13A/AvB	0.198	16A/AvB	0.399	27A/AvB	0.198	29A/AvB	0.246	10B/AvB	0.382	21B/AvB	0.359	25B/AvB	0.135	37B/AvB	0.123	113	3254.13	114	1690.24	115	3397.16
1	Q9TV62	Myosin-4 OS=Sus scrofa GN=MYH4 PE=2 SV=1	30936	287893	1373	1373	114	114	115629	1	1	0	1012.02	2022.02	2	2022.02	-0.0042	0	38.24	0.00087	R	LQNEVEDLMLDVER	S	Oxidation (M)	0.00000000200000.0		Cmpd 17100, AutoMSn(1012.0174), 190.5 min (13229323981824893)	13A/AvB	0.208	16A/AvB	0.224	27A/AvB	0.198	29A/AvB	0.28	10B/AvB	0.251	21B/AvB	0.259	25B/AvB	0.175	37B/AvB	0.315	113	5046.42	114	4190.87	115	4510.21
1	Q9TV62	Myosin-4 OS=Sus scrofa GN=MYH4 PE=2 SV=1	30936	287893	1373	1373	114	114	115630	1	1	0	675.014	2022.02	3	2022.02	-0.0041	0	72.18	3.6e-07	R	LQNEVEDLMLDVER	S	Oxidation (M)	0.00000000200000.0		Cmpd 16983, AutoMSn(675.0141), 190.4 min (13229323981562582)	13A/AvB	0.354	16A/AvB	0.25	27A/AvB	0.303	29A/AvB	0.211	10B/AvB	0.183	21B/AvB	0.404	25B/AvB	0.232	37B/AvB	0.181	113	1624.23	114	3146.6	115	2220.64
1	Q9TV62	Myosin-4 OS=Sus scrofa GN=MYH4 PE=2 SV=1	30936	287893	1373	1373	114	114	115631	1	1	0	675.014	2022.02	3	2022.02	-0.0041	0	57.34	6.7e-06	R	LQNEVEDLMLDVER	S	Oxidation (M)	0.00000000200000.0		Cmpd 16800, AutoMSn(675.0141), 187.1 min (13229323981824293)	13A/AvB	0.238	16A/AvB	0.322	27A/AvB	0.262	29A/AvB	0.138	10B/AvB	0.318	21B/AvB	0.26	25B/AvB	0.267	37B/AvB	0.155	113	5679	114	4245.57	115	5762.46
1	Q9TV62	Myosin-4 OS=Sus scrofa GN=MYH4 PE=2 SV=1	30936	287893	1373	1373	114	114	115632	1	1	0	675.014	2022.02	3	2022.02	-0.0041	0	22.29	0.0081	R	LQNEVEDLMLDVER	S	Oxidation (M)	0.00000000200000.0		Cmpd 16729, AutoMSn(675.0141), 186.2 min (13229323981824151)	13A/AvB	0.234	16A/AvB	0.218	27A/AvB	0.219	29A/AvB	0.23	10B/AvB	0.406	21B/AvB	0.291	25B/AvB	0.098	37B/AvB	0.206	113	6463.78	114	3732.67	115	3471.46
1	Q9TV62	Myosin-4 OS=Sus scrofa GN=MYH4 PE=2 SV=1	30936	287893	1373	1373	114	114	115634	1	1	0	675.014	2022.02	3	2022.02	-0.0041	0	84.69	2e-08	R	LQNEVEDLMLDVER	S	Oxidation (M)	0.00000000200000.0		Cmpd 17135, AutoMSn(675.0141), 190.9 min (13229323981824963)	13A/AvB	0.208	16A/AvB	0.151	27A/AvB	0.203	29A/AvB	0.164	10B/AvB	0.4	21B/AvB	0.225	25B/AvB	0.112	37B/AvB	0.263	113	12093.1	114	6291.08	115	4578.53
1	Q9TV62	Myosin-4 OS=Sus scrofa GN=MYH4 PE=2 SV=1	30936	287893	1373	1373	114	114	115637	1	1	0	1012.02	2022.02	2	2022.02	-0.0041	0	43.84	0.00024	R	LQNEVEDLMLDVER	S	Oxidation (M)	0.00000000200000.0		Cmpd 16898, AutoMSn(1012.0175), 191.3 min (13229323981727199)	13A/AvB	0.377	16A/AvB	0.308	27A/AvB	0.059	29A/AvB	0.356	10B/AvB	0.177	21B/AvB	0.277	25B/AvB	0.28	37B/AvB	0.265	113	2890.06	114	6169.92	115	5045.34
1	Q9TV62	Myosin-4 OS=Sus scrofa GN=MYH4 PE=2 SV=1	30936	287893	1373	1373	114	114	115638	1	1	0	1012.02	2022.02	2	2022.02	-0.004	0	19.17	0.021	R	LQNEVEDLMLDVER	S	Oxidation (M)	0.00000000200000.0		Cmpd 17141, AutoMSn(1012.0176), 193.8 min (13229323981776774)	13A/AvB	0.272	16A/AvB	0.22	27A/AvB	0.351	29A/AvB	0.031	10B/AvB	0.262	21B/AvB	0.467	25B/AvB	0.01	37B/AvB	0.262	113	2781.12	114	2890.79	115	2337.72
1	Q9TV62	Myosin-4 OS=Sus scrofa GN=MYH4 PE=2 SV=1	30936	287893	1373	1373	114	114	115640	1	1	0	1012.02	2022.02	2	2022.02	-0.004	0	56.78	1.2e-05	R	LQNEVEDLMLDVER	S	Oxidation (M)	0.00000000200000.0		Cmpd 16842, AutoMSn(1012.0176), 188.6 min (13229323981873038)	13A/AvB	0.26	16A/AvB	0.22	27A/AvB	0.189	29A/AvB	0.211	10B/AvB	0.217	21B/AvB	0.323	25B/AvB	0.176	37B/AvB	0.283	113	12724.1	114	15225.2	115	12866.6
1	Q9TV62	Myosin-4 OS=Sus scrofa GN=MYH4 PE=2 SV=1	30936	287893	1373	1373	114	114	115642	1	1	0	675.014	2022.02	3	2022.02	-0.0039	0	68.98	7.5e-07	R	LQNEVEDLMLDVER	S	Oxidation (M)	0.00000000200000.0		Cmpd 16639, AutoMSn(675.0142), 186.3 min (13229323981872632)	13A/AvB	0.205	16A/AvB	0.207	27A/AvB	0.217	29A/AvB	0.198	10B/AvB	0.307	21B/AvB	0.341	25B/AvB	0.139	37B/AvB	0.212	113	6680.5	114	4448.46	115	4502.46
1	Q9TV62	Myosin-4 OS=Sus scrofa GN=MYH4 PE=2 SV=1	30936	287893	1373	1373	114	114	115644	1	1	0	1012.02	2022.02	2	2022.02	-0.0039	0	43.21	0.00028	R	LQNEVEDLMLDVER	S	Oxidation (M)	0.00000000200000.0		Cmpd 16889, AutoMSn(1012.0176), 190.9 min (13229323981776270)	13A/AvB	0.314	16A/AvB	-0.043	27A/AvB	-0.001	29A/AvB	0.025	10B/AvB	0.112	21B/AvB	0.762	25B/AvB	-0.02	37B/AvB	0.146	113	4797.36	114	13477.8	115	-1854.72
1	Q9TV62	Myosin-4 OS=Sus scrofa GN=MYH4 PE=2 SV=1	30936	287893	1373	1373	114	114	115645	1	1	0	1012.02	2022.02	2	2022.02	-0.0039	0	69.22	7.1e-07	R	LQNEVEDLMLDVER	S	Oxidation (M)	0.00000000200000.0		Cmpd 16936, AutoMSn(1012.0176), 191.7 min (13229323981727275)	13A/AvB	0.217	16A/AvB	0.205	27A/AvB	0.165	29A/AvB	0.238	10B/AvB	0.272	21B/AvB	0.282	25B/AvB	0.169	37B/AvB	0.277	113	11268.7	114	9019.06	115	8503.39
1	Q9TV62	Myosin-4 OS=Sus scrofa GN=MYH4 PE=2 SV=1	30936	287893	1373	1373	114	114	115646	1	1	0	1012.02	2022.02	2	2022.02	-0.0039	0	55.98	1.5e-05	R	LQNEVEDLMLDVER	S	Oxidation (M)	0.00000000200000.0		Cmpd 16830, AutoMSn(1012.0176), 187.4 min (13229323981824353)	13A/AvB	0.192	16A/AvB	0.328	27A/AvB	0.225	29A/AvB	0.173	10B/AvB	0.339	21B/AvB	0.263	25B/AvB	0.152	37B/AvB	0.245	113	15781.4	114	8918.26	115	15249
1	Q9TV62	Myosin-4 OS=Sus scrofa GN=MYH4 PE=2 SV=1	30936	287893	1373	1373	114	114	115647	1	1	0	675.014	2022.02	3	2022.02	-0.0038	0	27.61	0.0026	R	LQNEVEDLMLDVER	S	Oxidation (M)	0.00000000200000.0		Cmpd 16785, AutoMSn(675.0142), 190.0 min (13229323981726973)	13A/AvB	0.14	16A/AvB	0.097	27A/AvB	0.153	29A/AvB	0.142	10B/AvB	0.821	21B/AvB	-0.009	25B/AvB	0.096	37B/AvB	0.092	113	3936.33	114	673.192	115	463.729
1	Q9TV62	Myosin-4 OS=Sus scrofa GN=MYH4 PE=2 SV=1	30936	287893	1373	1373	114	114	115648	1	1	0	675.014	2022.02	3	2022.02	-0.0038	0	54.22	1.5e-05	R	LQNEVEDLMLDVER	S	Oxidation (M)	0.00000000200000.0		Cmpd 16666, AutoMSn(675.0142), 186.7 min (13229323981561948)	13A/AvB	0.248	16A/AvB	0.558	27A/AvB	0.498	29A/AvB	0.3	10B/AvB	0.376	21B/AvB	0.262	25B/AvB	0.094	37B/AvB	0.268	113	2413.13	114	1587.63	115	3576.8
1	Q9TV62	Myosin-4 OS=Sus scrofa GN=MYH4 PE=2 SV=1	30936	287893	1373	1373	114	114	115649	1	1	0	675.014	2022.02	3	2022.02	-0.0038	0	74.11	2.3e-07	R	LQNEVEDLMLDVER	S	Oxidation (M)	0.00000000200000.0		Cmpd 16711, AutoMSn(675.0142), 187.1 min (13229323981872776)	13A/AvB	0.284	16A/AvB	0.336	27A/AvB	0.218	29A/AvB	0.229	10B/AvB	0.364	21B/AvB	0.198	25B/AvB	0.213	37B/AvB	0.224	113	4743.41	114	3702.08	115	4374.7
1	Q9TV62	Myosin-4 OS=Sus scrofa GN=MYH4 PE=2 SV=1	30936	287893	1373	1373	114	114	115650	1	1	0	675.014	2022.02	3	2022.02	-0.0038	0	47.25	3.7e-05	R	LQNEVEDLMLDVER	S	Oxidation (M)	0.00000000200000.0		Cmpd 16583, AutoMSn(675.0142), 184.6 min (13229323981823859)	13A/AvB	0.261	16A/AvB	0.258	27A/AvB	0.18	29A/AvB	0.175	10B/AvB	0.481	21B/AvB	0.172	25B/AvB	0.166	37B/AvB	0.181	113	13289.8	114	7208.99	115	7126.15
1	Q9TV62	Myosin-4 OS=Sus scrofa GN=MYH4 PE=2 SV=1	30936	287893	1373	1373	114	114	115652	1	1	0	1012.02	2022.02	2	2022.02	-0.0037	0	49.8	6.2e-05	R	LQNEVEDLMLDVER	S	Oxidation (M)	0.00000000200000.0		Cmpd 16752, AutoMSn(1012.0177), 189.4 min (13229323981775996)	13A/AvB	-0.022	16A/AvB	0.006	27A/AvB	0	29A/AvB	0	10B/AvB	0.295	21B/AvB	0.556	25B/AvB	-0.013	37B/AvB	0.162	113	10000	114	-745.014	115	205.464
1	Q9TV62	Myosin-4 OS=Sus scrofa GN=MYH4 PE=2 SV=1	30936	287893	1373	1373	114	114	115653	1	1	0	1012.02	2022.02	2	2022.02	-0.0037	0	56.06	1.5e-05	R	LQNEVEDLMLDVER	S	Oxidation (M)	0.00000000200000.0		Cmpd 17027, AutoMSn(1012.0177), 189.6 min (13229323981824747)	13A/AvB	0.168	16A/AvB	0.214	27A/AvB	0.149	29A/AvB	0.217	10B/AvB	0.206	21B/AvB	0.317	25B/AvB	0.188	37B/AvB	0.289	113	17408	114	14172.8	115	18077.7
1	Q9TV62	Myosin-4 OS=Sus scrofa GN=MYH4 PE=2 SV=1	30936	287893	1373	1373	114	114	115656	1	1	0	1012.02	2022.02	2	2022.02	-0.0036	0	54.48	2.1e-05	R	LQNEVEDLMLDVER	S	Oxidation (M)	0.00000000200000.0		Cmpd 16487, AutoMSn(1012.0178), 186.3 min (13229323981775466)	13A/AvB	-0.089	16A/AvB	1.751	27A/AvB	-0.029	29A/AvB	0.484	10B/AvB	0.725	21B/AvB	-0.03	25B/AvB	0	37B/AvB	0.304	113	8075.08	114	-992.187	115	19487.3
1	Q9TV62	Myosin-4 OS=Sus scrofa GN=MYH4 PE=2 SV=1	30936	287893	1373	1373	114	114	115657	1	1	0	1012.02	2022.02	2	2022.02	-0.0036	0	29.54	0.0066	R	LQNEVEDLMLDVER	S	Oxidation (M)	0.00000000200000.0		Cmpd 16857, AutoMSn(1012.0178), 188.9 min (13229323981562330)	13A/AvB	0.174	16A/AvB	0.146	27A/AvB	0.156	29A/AvB	0.136	10B/AvB	0.303	21B/AvB	0.255	25B/AvB	0.228	37B/AvB	0.214	113	9037.78	114	5171.34	115	4358.88
1	Q9TV62	Myosin-4 OS=Sus scrofa GN=MYH4 PE=2 SV=1	30936	287893	1373	1373	114	114	115658	1	1	0	1012.02	2022.02	2	2022.02	-0.0036	0	40.99	0.00047	R	LQNEVEDLMLDVER	S	Oxidation (M)	0.00000000200000.0		Cmpd 17321, AutoMSn(1012.0178), 193.0 min (13229323981825335)	13A/AvB	0.314	16A/AvB	0.244	27A/AvB	0.188	29A/AvB	0.193	10B/AvB	0.201	21B/AvB	0.265	25B/AvB	0.241	37B/AvB	0.293	113	5709.34	114	8907.87	115	6931.45
1	Q9TV62	Myosin-4 OS=Sus scrofa GN=MYH4 PE=2 SV=1	30936	287893	1373	1373	114	114	115659	1	1	0	1012.02	2022.02	2	2022.02	-0.0036	0	63.08	2.9e-06	R	LQNEVEDLMLDVER	S	Oxidation (M)	0.00000000200000.0		Cmpd 16952, AutoMSn(1012.0178), 191.9 min (13229323981727307)	13A/AvB	0.214	16A/AvB	0.222	27A/AvB	0.146	29A/AvB	0.224	10B/AvB	0.25	21B/AvB	0.285	25B/AvB	0.183	37B/AvB	0.282	113	17282.8	114	14837.4	115	15344.6
1	Q9TV62	Myosin-4 OS=Sus scrofa GN=MYH4 PE=2 SV=1	30936	287893	1373	1373	114	114	115660	1	1	0	1012.02	2022.02	2	2022.02	-0.0036	0	59.12	7.3e-06	R	LQNEVEDLMLDVER	S	Oxidation (M)	0.00000000200000.0		Cmpd 17058, AutoMSn(1012.0178), 191.1 min (13229323981873470)	13A/AvB	0.192	16A/AvB	0.243	27A/AvB	0.165	29A/AvB	0.198	10B/AvB	0.25	21B/AvB	0.298	25B/AvB	0.172	37B/AvB	0.281	113	23282	114	17875.5	115	22641.5
1	Q9TV62	Myosin-4 OS=Sus scrofa GN=MYH4 PE=2 SV=1	30936	287893	1373	1373	114	114	115661	1	1	0	675.014	2022.02	3	2022.02	-0.0036	0	64.8	2e-06	R	LQNEVEDLMLDVER	S	Oxidation (M)	0.00000000200000.0		Cmpd 16962, AutoMSn(675.0143), 190.0 min (13229323981873278)	13A/AvB	0.236	16A/AvB	0.273	27A/AvB	0.254	29A/AvB	0.151	10B/AvB	0.253	21B/AvB	0.329	25B/AvB	0.182	37B/AvB	0.236	113	5581.01	114	5204.3	115	6035.59
1	Q9TV62	Myosin-4 OS=Sus scrofa GN=MYH4 PE=2 SV=1	30936	287893	1373	1373	114	114	115662	1	1	0	675.014	2022.02	3	2022.02	-0.0036	0	92.15	3.6e-09	R	LQNEVEDLMLDVER	S	Oxidation (M)	0.00000000200000.0		Cmpd 17207, AutoMSn(675.0143), 191.7 min (13229323981825107)	13A/AvB	0.21	16A/AvB	0.33	27A/AvB	0.248	29A/AvB	0.222	10B/AvB	0.244	21B/AvB	0.261	25B/AvB	0.163	37B/AvB	0.332	113	10973.7	114	9436.98	115	14868.2
1	Q9TV62	Myosin-4 OS=Sus scrofa GN=MYH4 PE=2 SV=1	30936	287893	1373	1373	114	114	115663	1	1	0	1012.02	2022.02	2	2022.02	-0.0035	0	40.08	0.00058	R	LQNEVEDLMLDVER	S	Oxidation (M)	0.00000000200000.0		Cmpd 16646, AutoMSn(1012.0178), 188.4 min (13229323981726695)	13A/AvB	0.178	16A/AvB	0.218	27A/AvB	0.142	29A/AvB	0.174	10B/AvB	0.349	21B/AvB	0.316	25B/AvB	0.215	37B/AvB	0.121	113	5855.41	114	2986.92	115	3655.41
1	Q9TV62	Myosin-4 OS=Sus scrofa GN=MYH4 PE=2 SV=1	30936	287893	1373	1373	114	114	115664	1	1	0	1012.02	2022.02	2	2022.02	-0.0035	0	49.52	6.6e-05	R	LQNEVEDLMLDVER	S	Oxidation (M)	0.00000000200000.0		Cmpd 17313, AutoMSn(1012.0178), 194.1 min (13229323981563242)	13A/AvB	0.183	16A/AvB	0.139	27A/AvB	0.223	29A/AvB	0.225	10B/AvB	0.229	21B/AvB	0.338	25B/AvB	0.158	37B/AvB	0.275	113	9647.41	114	7706.99	115	5839.83
1	Q9TV62	Myosin-4 OS=Sus scrofa GN=MYH4 PE=2 SV=1	30936	287893	1373	1373	114	114	115665	1	1	0	1012.02	2022.02	2	2022.02	-0.0035	0	62.98	3e-06	R	LQNEVEDLMLDVER	S	Oxidation (M)	0.00000000200000.0		Cmpd 17025, AutoMSn(1012.0178), 192.5 min (13229323981776542)	13A/AvB	-0.065	16A/AvB	1.234	27A/AvB	-0.001	29A/AvB	0.299	10B/AvB	0.544	21B/AvB	0.012	25B/AvB	-0.002	37B/AvB	0.446	113	20244.2	114	-2427.9	115	45910.8
1	Q9TV62	Myosin-4 OS=Sus scrofa GN=MYH4 PE=2 SV=1	30936	287893	1373	1373	114	114	115666	1	1	0	1012.02	2022.02	2	2022.02	-0.0035	0	54.6	2.1e-05	R	LQNEVEDLMLDVER	S	Oxidation (M)	0.00000000200000.0		Cmpd 17181, AutoMSn(1012.0178), 192.6 min (13229323981562978)	13A/AvB	0.201	16A/AvB	0.171	27A/AvB	0.182	29A/AvB	0.217	10B/AvB	0.223	21B/AvB	0.296	25B/AvB	0.181	37B/AvB	0.3	113	12729.8	114	11476.2	115	9792.46
1	Q9TV62	Myosin-4 OS=Sus scrofa GN=MYH4 PE=2 SV=1	30936	287893	1373	1373	114	114	115668	1	1	0	675.014	2022.02	3	2022.02	-0.0034	0	47.7	5.8e-05	R	LQNEVEDLMLDVER	S	Oxidation (M)	0.00000000200000.0		Cmpd 16463, AutoMSn(675.0143), 186.1 min (13229323981775418)	13A/AvB	-0.052	16A/AvB	0.002	27A/AvB	0.142	29A/AvB	0.22	10B/AvB	0.705	21B/AvB	-0.006	25B/AvB	0.152	37B/AvB	0.149	113	8023.68	114	-594.808	115	18.0583
1	Q9TV62	Myosin-4 OS=Sus scrofa GN=MYH4 PE=2 SV=1	30936	287893	1373	1373	114	114	115669	1	1	0	675.014	2022.02	3	2022.02	-0.0034	0	60.44	5.6e-06	R	LQNEVEDLMLDVER	S	Oxidation (M)	0.00000000200000.0		Cmpd 17290, AutoMSn(675.0144), 193.9 min (13229323981563196)	13A/AvB	0.19	16A/AvB	0.396	27A/AvB	0.291	29A/AvB	0.162	10B/AvB	0.448	21B/AvB	0.37	25B/AvB	0.082	37B/AvB	0.099	113	2105.75	114	892.435	115	1859.02
1	Q9TV62	Myosin-4 OS=Sus scrofa GN=MYH4 PE=2 SV=1	30936	287893	1373	1373	114	114	115670	1	1	0	675.014	2022.02	3	2022.02	-0.0034	0	95.99	1.5e-09	R	LQNEVEDLMLDVER	S	Oxidation (M)	0.00000000200000.0		Cmpd 16655, AutoMSn(675.0144), 185.4 min (13229323981824003)	13A/AvB	0.21	16A/AvB	0.247	27A/AvB	0.178	29A/AvB	0.197	10B/AvB	0.377	21B/AvB	0.188	25B/AvB	0.219	37B/AvB	0.215	113	12987.9	114	7248.56	115	8509.04
1	Q9TV62	Myosin-4 OS=Sus scrofa GN=MYH4 PE=2 SV=1	30936	287893	1373	1373	114	114	115671	1	1	0	675.014	2022.02	3	2022.02	-0.0034	0	79.91	6.3e-08	R	LQNEVEDLMLDVER	S	Oxidation (M)	0.00000000200000.0		Cmpd 17015, AutoMSn(675.0143), 189.5 min (13229323981824723)	13A/AvB	0.15	16A/AvB	0.238	27A/AvB	0.201	29A/AvB	0.131	10B/AvB	0.579	21B/AvB	0.168	25B/AvB	0.106	37B/AvB	0.146	113	27719	114	7165.53	115	11394.8
1	Q9TV62	Myosin-4 OS=Sus scrofa GN=MYH4 PE=2 SV=1	30936	287893	1373	1373	114	114	115673	1	1	0	1012.02	2022.02	2	2022.02	-0.0034	0	38.75	0.00082	R	LQNEVEDLMLDVER	S	Oxidation (M)	0.00000000200000.0		Cmpd 17102, AutoMSn(1012.0179), 193.3 min (13229323981776696)	13A/AvB	0.02	16A/AvB	0.181	27A/AvB	0.355	29A/AvB	-0.008	10B/AvB	0.36	21B/AvB	0.427	25B/AvB	-0.036	37B/AvB	0.249	113	12849.4	114	714.937	115	6477.73
1	Q9TV62	Myosin-4 OS=Sus scrofa GN=MYH4 PE=2 SV=1	30936	287893	1373	1373	114	114	115674	1	1	0	1012.02	2022.02	2	2022.02	-0.0034	0	48.36	9e-05	R	LQNEVEDLMLDVER	S	Oxidation (M)	0.00000000200000.0		Cmpd 16929, AutoMSn(1012.0179), 189.7 min (13229323981562474)	13A/AvB	0.166	16A/AvB	0.234	27A/AvB	0.199	29A/AvB	0.154	10B/AvB	0.339	21B/AvB	0.286	25B/AvB	0.183	37B/AvB	0.192	113	17196.7	114	8453.43	115	11886
1	Q9TV62	Myosin-4 OS=Sus scrofa GN=MYH4 PE=2 SV=1	30936	287893	1373	1373	114	114	115676	1	1	0	1012.02	2022.02	2	2022.02	-0.0033	0	66.14	1.5e-06	R	LQNEVEDLMLDVER	S	Oxidation (M)	0.00000000200000.0		Cmpd 16707, AutoMSn(1012.0179), 189.1 min (13229323981726817)	13A/AvB	0.15	16A/AvB	0.212	27A/AvB	0.142	29A/AvB	0.233	10B/AvB	0.223	21B/AvB	0.26	25B/AvB	0.249	37B/AvB	0.269	113	10117.2	114	6821.16	115	9640.38
1	Q9TV62	Myosin-4 OS=Sus scrofa GN=MYH4 PE=2 SV=1	30936	287893	1373	1373	114	114	115677	1	1	0	675.014	2022.02	3	2022.02	-0.0032	0	72.79	3.2e-07	R	LQNEVEDLMLDVER	S	Oxidation (M)	0.00000000200000.0		Cmpd 16829, AutoMSn(675.0144), 190.2 min (13229323981776150)	13A/AvB	-0.072	16A/AvB	0.743	27A/AvB	0.544	29A/AvB	-0.012	10B/AvB	0.765	21B/AvB	0.034	25B/AvB	-0.03	37B/AvB	0.231	113	7009.99	114	-656.917	115	6805.57
1	Q9TV62	Myosin-4 OS=Sus scrofa GN=MYH4 PE=2 SV=1	30936	287893	1373	1373	114	114	115681	1	1	0	1012.02	2022.02	2	2022.02	-0.0031	0	39.19	0.00073	R	LQNEVEDLMLDVER	S	Oxidation (M)	0.00000000200000.0		Cmpd 16796, AutoMSn(1012.0180), 187.0 min (13229323981824285)	13A/AvB	0.065	16A/AvB	0.233	27A/AvB	0.263	29A/AvB	0.152	10B/AvB	0.371	21B/AvB	0.258	25B/AvB	0.204	37B/AvB	0.167	113	7603.58	114	1335.66	115	4784.36
1	Q9TV62	Myosin-4 OS=Sus scrofa GN=MYH4 PE=2 SV=1	30936	287893	1373	1373	114	114	115682	1	1	0	1012.02	2022.02	2	2022.02	-0.0031	0	61.5	4.3e-06	R	LQNEVEDLMLDVER	S	Oxidation (M)	0.00000000200000.0		Cmpd 16718, AutoMSn(1012.0180), 189.2 min (13229323981726839)	13A/AvB	0.222	16A/AvB	0.107	27A/AvB	0.171	29A/AvB	0.257	10B/AvB	0.263	21B/AvB	0.352	25B/AvB	0.133	37B/AvB	0.251	113	17040.2	114	14337.2	115	6933.81
1	Q9TV62	Myosin-4 OS=Sus scrofa GN=MYH4 PE=2 SV=1	30936	287893	1373	1373	114	114	115683	1	1	0	675.014	2022.02	3	2022.02	-0.003	0	84.29	2.3e-08	R	LQNEVEDLMLDVER	S	Oxidation (M)	0.00000000200000.0		Cmpd 16943, AutoMSn(675.0144), 188.7 min (13229323981824579)	13A/AvB	0.219	16A/AvB	0.251	27A/AvB	0.207	29A/AvB	0.192	10B/AvB	0.271	21B/AvB	0.257	25B/AvB	0.209	37B/AvB	0.262	113	11214.5	114	9056.15	115	10377.6
1	Q9TV62	Myosin-4 OS=Sus scrofa GN=MYH4 PE=2 SV=1	30936	287893	1373	1373	114	114	115686	1	1	0	1012.02	2022.02	2	2022.02	-0.003	0	40.55	0.00053	R	LQNEVEDLMLDVER	S	Oxidation (M)	0.00000000200000.0		Cmpd 16641, AutoMSn(1012.0180), 186.5 min (13229323981561898)	13A/AvB	0.135	16A/AvB	0.261	27A/AvB	0.223	29A/AvB	0.253	10B/AvB	0.284	21B/AvB	0.385	25B/AvB	0.182	37B/AvB	0.149	113	7739.31	114	3670.05	115	7107.4
1	Q9TV62	Myosin-4 OS=Sus scrofa GN=MYH4 PE=2 SV=1	30936	287893	1373	1373	114	114	115687	1	1	0	1012.02	2022.02	2	2022.02	-0.003	0	42.12	0.00037	R	LQNEVEDLMLDVER	S	Oxidation (M)	0.00000000200000.0		Cmpd 16713, AutoMSn(1012.0180), 187.3 min (13229323981562042)	13A/AvB	0.15	16A/AvB	0.143	27A/AvB	0.215	29A/AvB	0.117	10B/AvB	0.246	21B/AvB	0.32	25B/AvB	0.225	37B/AvB	0.209	113	10528.3	114	6420.92	115	6124.86
1	Q9TV62	Myosin-4 OS=Sus scrofa GN=MYH4 PE=2 SV=1	30936	287893	1373	1373	114	114	115688	1	1	0	1012.02	2022.02	2	2022.02	-0.003	0	61.92	3.9e-06	R	LQNEVEDLMLDVER	S	Oxidation (M)	0.00000000200000.0		Cmpd 17129, AutoMSn(1012.0180), 190.8 min (13229323981824951)	13A/AvB	0.2	16A/AvB	0.295	27A/AvB	0.189	29A/AvB	0.214	10B/AvB	0.236	21B/AvB	0.295	25B/AvB	0.21	37B/AvB	0.259	113	16580.5	114	14009.2	115	20692
1	Q9TV62	Myosin-4 OS=Sus scrofa GN=MYH4 PE=2 SV=1	30936	287893	1373	1373	114	114	115689	1	1	0	1012.02	2022.02	2	2022.02	-0.003	0	65.24	1.8e-06	R	LQNEVEDLMLDVER	S	Oxidation (M)	0.00000000200000.0		Cmpd 16817, AutoMSn(1012.0181), 190.1 min (13229323981776126)	13A/AvB	0	16A/AvB	-0.007	27A/AvB	0	29A/AvB	0.004	10B/AvB	0.362	21B/AvB	0.507	25B/AvB	-0.021	37B/AvB	0.152	113	55873.9	114	-13.8835	115	-1106.54
1	Q9TV62	Myosin-4 OS=Sus scrofa GN=MYH4 PE=2 SV=1	30936	287893	1373	1373	114	114	115690	1	1	0	1012.02	2022.02	2	2022.02	-0.003	0	62.8	3.2e-06	R	LQNEVEDLMLDVER	S	Oxidation (M)	0.00000000200000.0		Cmpd 16837, AutoMSn(1012.0180), 190.3 min (13229323981776166)	13A/AvB	0.145	16A/AvB	0.169	27A/AvB	0	29A/AvB	-0.001	10B/AvB	0.138	21B/AvB	0.669	25B/AvB	-0.021	37B/AvB	0.215	113	15552.9	114	16381.4	115	19028.2
1	Q9TV62	Myosin-4 OS=Sus scrofa GN=MYH4 PE=2 SV=1	30936	287893	1373	1373	114	114	115692	1	1	0	1012.02	2022.02	2	2022.02	-0.0029	0	50.27	5.7e-05	R	LQNEVEDLMLDVER	S	Oxidation (M)	0.00000000200000.0		Cmpd 16613, AutoMSn(1012.0181), 184.9 min (13229323981823919)	13A/AvB	0.245	16A/AvB	0.293	27A/AvB	0.248	29A/AvB	0.177	10B/AvB	0.331	21B/AvB	0.283	25B/AvB	0.177	37B/AvB	0.209	113	14984	114	11103.3	115	13273.3
1	Q9TV62	Myosin-4 OS=Sus scrofa GN=MYH4 PE=2 SV=1	30936	287893	1373	1373	114	114	115693	1	1	0	675.014	2022.02	3	2022.02	-0.0028	0	71.41	4.4e-07	R	LQNEVEDLMLDVER	S	Oxidation (M)	0.00000000200000.0		Cmpd 17055, AutoMSn(675.0145), 191.2 min (13229323981562726)	13A/AvB	0.136	16A/AvB	0.099	27A/AvB	0.111	29A/AvB	0.046	10B/AvB	0.545	21B/AvB	0.199	25B/AvB	0.147	37B/AvB	0.109	113	10227.2	114	2550.98	115	1857.93
1	Q9TV62	Myosin-4 OS=Sus scrofa GN=MYH4 PE=2 SV=1	30936	287893	1373	1373	114	114	115694	1	1	0	675.014	2022.02	3	2022.02	-0.0028	0	64.93	1.9e-06	R	LQNEVEDLMLDVER	S	Oxidation (M)	0.00000000200000.0		Cmpd 16911, AutoMSn(675.0145), 189.5 min (13229323981562438)	13A/AvB	0.151	16A/AvB	0.22	27A/AvB	0.125	29A/AvB	0.149	10B/AvB	0.421	21B/AvB	0.132	25B/AvB	0.276	37B/AvB	0.171	113	3845.26	114	1373.53	115	2004.04
1	Q9TV62	Myosin-4 OS=Sus scrofa GN=MYH4 PE=2 SV=1	30936	287893	1373	1373	114	114	115696	1	1	0	675.014	2022.02	3	2022.02	-0.0028	0	99.16	7.3e-10	R	LQNEVEDLMLDVER	S	Oxidation (M)	0.00000000200000.0		Cmpd 16782, AutoMSn(675.0145), 187.9 min (13229323981872918)	13A/AvB	0.247	16A/AvB	0.189	27A/AvB	0.123	29A/AvB	0.289	10B/AvB	0.33	21B/AvB	0.246	25B/AvB	0.201	37B/AvB	0.223	113	10043.6	114	7503.33	115	5739.31
1	Q9TV62	Myosin-4 OS=Sus scrofa GN=MYH4 PE=2 SV=1	30936	287893	1373	1373	114	114	115699	1	1	0	1012.02	2022.02	2	2022.02	-0.0028	0	45.02	0.00019	R	LQNEVEDLMLDVER	S	Oxidation (M)	0.00000000200000.0		Cmpd 16950, AutoMSn(1012.0182), 189.9 min (13229323981873254)	13A/AvB	0.208	16A/AvB	0.337	27A/AvB	0.195	29A/AvB	0.313	10B/AvB	0.233	21B/AvB	0.259	25B/AvB	0.195	37B/AvB	0.313	113	7373.93	114	6578	115	10659.5
1	Q9TV62	Myosin-4 OS=Sus scrofa GN=MYH4 PE=2 SV=1	30936	287893	1373	1373	114	114	115700	1	1	0	1012.02	2022.02	2	2022.02	-0.0028	0	71.76	4.1e-07	R	LQNEVEDLMLDVER	S	Oxidation (M)	0.00000000200000.0		Cmpd 17073, AutoMSn(1012.0182), 191.4 min (13229323981562762)	13A/AvB	0.225	16A/AvB	0.214	27A/AvB	0.263	29A/AvB	0.212	10B/AvB	0.248	21B/AvB	0.291	25B/AvB	0.203	37B/AvB	0.258	113	13838.5	114	12572.3	115	11932
1	Q9TV62	Myosin-4 OS=Sus scrofa GN=MYH4 PE=2 SV=1	30936	287893	1373	1373	114	114	115701	1	1	0	1012.02	2022.02	2	2022.02	-0.0028	0	67.38	1.1e-06	R	LQNEVEDLMLDVER	S	Oxidation (M)	0.00000000200000.0		Cmpd 17069, AutoMSn(1012.0182), 193.0 min (13229323981776630)	13A/AvB	-0.006	16A/AvB	0.171	27A/AvB	0	29A/AvB	-0.001	10B/AvB	0.252	21B/AvB	0.58	25B/AvB	-0.024	37B/AvB	0.192	113	24340.5	114	-532.229	115	16484.8
1	Q9TV62	Myosin-4 OS=Sus scrofa GN=MYH4 PE=2 SV=1	30936	287893	1373	1373	114	114	115702	1	1	0	675.015	2022.02	3	2022.02	-0.0027	0	63.86	2.5e-06	R	LQNEVEDLMLDVER	S	Oxidation (M)	0.00000000200000.0		Cmpd 16434, AutoMSn(675.0146), 184.0 min (13229323981872222)	13A/AvB	0.285	16A/AvB	0.288	27A/AvB	0.204	29A/AvB	0.198	10B/AvB	0.325	21B/AvB	0.315	25B/AvB	0.133	37B/AvB	0.226	113	6324.95	114	5534.26	115	5603.47
1	Q9TV62	Myosin-4 OS=Sus scrofa GN=MYH4 PE=2 SV=1	30936	287893	1373	1373	114	114	115703	1	1	0	1012.02	2022.02	2	2022.02	-0.0026	0	53.8	2.5e-05	R	LQNEVEDLMLDVER	S	Oxidation (M)	0.00000000200000.0		Cmpd 17063, AutoMSn(1012.0182), 191.3 min (13229323981562742)	13A/AvB	0.167	16A/AvB	0.23	27A/AvB	0.166	29A/AvB	0.168	10B/AvB	0.226	21B/AvB	0.298	25B/AvB	0.201	37B/AvB	0.274	113	19697.3	114	14586.4	115	20078.4
1	Q9TV62	Myosin-4 OS=Sus scrofa GN=MYH4 PE=2 SV=1	30936	287893	1373	1373	114	114	115705	1	1	0	1012.02	2022.02	2	2022.02	-0.0025	0	60.05	6e-06	R	LQNEVEDLMLDVER	S	Oxidation (M)	0.00000000200000.0		Cmpd 16716, AutoMSn(1012.0183), 187.2 min (13229323981872786)	13A/AvB	0.17	16A/AvB	0.223	27A/AvB	0.167	29A/AvB	0.13	10B/AvB	0.257	21B/AvB	0.329	25B/AvB	0.145	37B/AvB	0.269	113	11583.9	114	7659.46	115	10030.3
1	Q9TV62	Myosin-4 OS=Sus scrofa GN=MYH4 PE=2 SV=1	30936	287893	1373	1373	114	114	115707	1	1	0	1012.02	2022.02	2	2022.02	-0.0025	0	69.26	7.2e-07	R	LQNEVEDLMLDVER	S	Oxidation (M)	0.00000000200000.0		Cmpd 16902, AutoMSn(1012.0183), 188.2 min (13229323981824497)	13A/AvB	0.182	16A/AvB	0.204	27A/AvB	0.195	29A/AvB	0.177	10B/AvB	0.264	21B/AvB	0.279	25B/AvB	0.193	37B/AvB	0.264	113	17461.7	114	12056.8	115	13513
1	Q9TV62	Myosin-4 OS=Sus scrofa GN=MYH4 PE=2 SV=1	30936	287893	1373	1373	114	114	115708	1	1	0	1012.02	2022.02	2	2022.02	-0.0025	0	57.17	1.2e-05	R	LQNEVEDLMLDVER	S	Oxidation (M)	0.00000000200000.0		Cmpd 17204, AutoMSn(1012.0183), 192.8 min (13229323981563024)	13A/AvB	0.221	16A/AvB	0.248	27A/AvB	0.195	29A/AvB	0.215	10B/AvB	0.227	21B/AvB	0.302	25B/AvB	0.16	37B/AvB	0.311	113	24641.3	114	24006.3	115	26935.6
1	Q9TV62	Myosin-4 OS=Sus scrofa GN=MYH4 PE=2 SV=1	30936	287893	1373	1373	114	114	115710	1	1	0	675.015	2022.02	3	2022.02	-0.0025	0	82.36	3.5e-08	R	LQNEVEDLMLDVER	S	Oxidation (M)	0.00000000200000.0		Cmpd 16871, AutoMSn(675.0146), 187.9 min (13229323981824435)	13A/AvB	0.185	16A/AvB	0.229	27A/AvB	0.167	29A/AvB	0.176	10B/AvB	0.348	21B/AvB	0.252	25B/AvB	0.16	37B/AvB	0.24	113	11588.4	114	6156.81	115	7644.96
1	Q9TV62	Myosin-4 OS=Sus scrofa GN=MYH4 PE=2 SV=1	30936	287893	1373	1373	114	114	115712	1	1	0	1012.02	2022.02	2	2022.02	-0.0024	0	28.18	0.0093	R	LQNEVEDLMLDVER	S	Oxidation (M)	0.00000000200000.0		Cmpd 16430, AutoMSn(1012.0184), 185.9 min (13229323981726263)	13A/AvB	0.119	16A/AvB	0.214	27A/AvB	0.215	29A/AvB	0.142	10B/AvB	0.199	21B/AvB	0.363	25B/AvB	0.169	37B/AvB	0.268	113	2896.25	114	1728.96	115	3112.46
1	Q9TV62	Myosin-4 OS=Sus scrofa GN=MYH4 PE=2 SV=1	30936	287893	1373	1373	114	114	115713	1	1	0	1012.02	2022.02	2	2022.02	-0.0024	0	43.39	0.00028	R	LQNEVEDLMLDVER	S	Oxidation (M)	0.00000000200000.0		Cmpd 16644, AutoMSn(1012.0184), 186.4 min (13229323981872642)	13A/AvB	0.103	16A/AvB	0.245	27A/AvB	0.189	29A/AvB	0.12	10B/AvB	0.356	21B/AvB	0.266	25B/AvB	0.17	37B/AvB	0.208	113	12196.6	114	3515.79	115	8402.97
1	Q9TV62	Myosin-4 OS=Sus scrofa GN=MYH4 PE=2 SV=1	30936	287893	1373	1373	114	114	115714	1	1	0	1012.02	2022.02	2	2022.02	-0.0024	0	52.76	3.2e-05	R	LQNEVEDLMLDVER	S	Oxidation (M)	0.00000000200000.0		Cmpd 16686, AutoMSn(1012.0184), 185.8 min (13229323981824065)	13A/AvB	0.189	16A/AvB	0.13	27A/AvB	0.233	29A/AvB	0.232	10B/AvB	0.309	21B/AvB	0.321	25B/AvB	0.181	37B/AvB	0.188	113	9034.18	114	5527.09	115	3795.47
1	Q9TV62	Myosin-4 OS=Sus scrofa GN=MYH4 PE=2 SV=1	30936	287893	1373	1373	114	114	115717	1	1	0	1012.02	2022.02	2	2022.02	-0.0022	0	24.58	0.021	R	LQNEVEDLMLDVER	S	Oxidation (M)	0.00000000200000.0		Cmpd 17146, AutoMSn(1012.0185), 192.2 min (13229323981562908)	13A/AvB	0.508	16A/AvB	0.42	27A/AvB	0.27	29A/AvB	0.162	10B/AvB	0.177	21B/AvB	0.342	25B/AvB	0.218	37B/AvB	0.263	113	1615.56	114	4641.5	115	3834.9
1	Q9TV62	Myosin-4 OS=Sus scrofa GN=MYH4 PE=2 SV=1	30936	287893	1373	1373	114	114	115718	1	1	0	675.015	2022.02	3	2022.02	-0.0021	0	41.83	0.00019	R	LQNEVEDLMLDVER	S	Oxidation (M)	0.00000000200000.0		Cmpd 17089, AutoMSn(675.0148), 190.3 min (13229323981824871)	13A/AvB	0.172	16A/AvB	0.225	27A/AvB	0.179	29A/AvB	0.119	10B/AvB	0.546	21B/AvB	0.196	25B/AvB	0.076	37B/AvB	0.182	113	13245.3	114	4162.24	115	5453.02
1	Q9TV62	Myosin-4 OS=Sus scrofa GN=MYH4 PE=2 SV=1	30936	287893	1373	1373	114	114	115719	1	1	0	1012.02	2022.02	2	2022.02	-0.002	0	58.86	7.9e-06	R	LQNEVEDLMLDVER	S	Oxidation (M)	0.00000000200000.0		Cmpd 16435, AutoMSn(1012.0185), 184.0 min (13229323981872224)	13A/AvB	0.161	16A/AvB	0.197	27A/AvB	0.14	29A/AvB	0.13	10B/AvB	0.237	21B/AvB	0.327	25B/AvB	0.202	37B/AvB	0.234	113	6823	114	4625.18	115	5663.69
1	Q9TV62	Myosin-4 OS=Sus scrofa GN=MYH4 PE=2 SV=1	30936	287893	1373	1373	114	114	115720	1	1	0	1012.02	2022.02	2	2022.02	-0.002	0	64.61	2.1e-06	R	LQNEVEDLMLDVER	S	Oxidation (M)	0.00000000200000.0		Cmpd 17249, AutoMSn(1012.0186), 192.2 min (13229323981825191)	13A/AvB	0.212	16A/AvB	0.2	27A/AvB	0.174	29A/AvB	0.217	10B/AvB	0.206	21B/AvB	0.307	25B/AvB	0.199	37B/AvB	0.288	113	22742.1	114	23342.2	115	22066.5
1	Q9TV62	Myosin-4 OS=Sus scrofa GN=MYH4 PE=2 SV=1	30936	287893	1373	1373	114	114	115722	1	1	0	675.015	2022.02	3	2022.02	-0.0019	0	68.07	9.5e-07	R	LQNEVEDLMLDVER	S	Oxidation (M)	0.00000000200000.0		Cmpd 16854, AutoMSn(675.0148), 188.8 min (13229323981873062)	13A/AvB	0.121	16A/AvB	0.106	27A/AvB	0.134	29A/AvB	0.126	10B/AvB	0.777	21B/AvB	0.088	25B/AvB	0.052	37B/AvB	0.083	113	33520.9	114	5232.57	115	4580.97
1	Q9TV62	Myosin-4 OS=Sus scrofa GN=MYH4 PE=2 SV=1	30936	287893	1373	1373	114	114	115724	1	1	0	1012.02	2022.02	2	2022.02	-0.0019	0	22.34	0.034	R	LQNEVEDLMLDVER	S	Oxidation (M)	0.00000000200000.0		Cmpd 16403, AutoMSn(1012.0186), 183.6 min (13229323981872160)	13A/AvB	0.159	16A/AvB	0.301	27A/AvB	0.162	29A/AvB	0.297	10B/AvB	0.197	21B/AvB	0.469	25B/AvB	0.16	37B/AvB	0.175	113	2125.36	114	1720.86	115	3253.46
1	Q9TV62	Myosin-4 OS=Sus scrofa GN=MYH4 PE=2 SV=1	30936	287893	1373	1373	114	114	115725	1	1	0	1012.02	2022.02	2	2022.02	-0.0019	0	69.33	7.1e-07	R	LQNEVEDLMLDVER	S	Oxidation (M)	0.00000000200000.0		Cmpd 17273, AutoMSn(1012.0186), 193.6 min (13229323981563162)	13A/AvB	0.195	16A/AvB	0.23	27A/AvB	0.19	29A/AvB	0.25	10B/AvB	0.2	21B/AvB	0.295	25B/AvB	0.207	37B/AvB	0.298	113	24940.6	114	24218.9	115	28616.4
1	Q9TV62	Myosin-4 OS=Sus scrofa GN=MYH4 PE=2 SV=1	30936	287893	1373	1373	114	114	115726	1	1	0	1012.02	2022.02	2	2022.02	-0.0017	0	67.17	1.2e-06	R	LQNEVEDLMLDVER	S	Oxidation (M)	0.00000000200000.0		Cmpd 16986, AutoMSn(1012.0187), 190.4 min (13229323981562588)	13A/AvB	0.186	16A/AvB	0.23	27A/AvB	0.191	29A/AvB	0.275	10B/AvB	0.228	21B/AvB	0.294	25B/AvB	0.187	37B/AvB	0.291	113	30243.5	114	24774.7	115	30626.8
1	Q9TV62	Myosin-4 OS=Sus scrofa GN=MYH4 PE=2 SV=1	30936	287893	1373	1373	114	114	115727	1	1	0	1012.02	2022.02	2	2022.02	-0.0017	0	66.96	1.2e-06	R	LQNEVEDLMLDVER	S	Oxidation (M)	0.00000000200000.0		Cmpd 17175, AutoMSn(1012.0187), 191.3 min (13229323981825043)	13A/AvB	0.218	16A/AvB	0.218	27A/AvB	0.187	29A/AvB	0.232	10B/AvB	0.223	21B/AvB	0.299	25B/AvB	0.186	37B/AvB	0.291	113	54922.4	114	53571.2	115	53542.4
1	Q9TV62	Myosin-4 OS=Sus scrofa GN=MYH4 PE=2 SV=1	30936	287893	1373	1373	114	114	115728	1	1	0	675.015	2022.02	3	2022.02	-0.0016	0	92.02	3.8e-09	R	LQNEVEDLMLDVER	S	Oxidation (M)	0.00000000200000.0		Cmpd 17034, AutoMSn(675.0149), 190.8 min (13229323981873422)	13A/AvB	0.136	16A/AvB	0.152	27A/AvB	0.123	29A/AvB	0.177	10B/AvB	0.283	21B/AvB	0.311	25B/AvB	0.232	37B/AvB	0.174	113	11187.1	114	5380.61	115	6023.46
1	Q9TV62	Myosin-4 OS=Sus scrofa GN=MYH4 PE=2 SV=1	30936	287893	1373	1373	114	114	115729	1	1	0	1012.02	2022.02	2	2022.02	-0.0016	0	17.59	0.037	R	LQNEVEDLMLDVER	S	Oxidation (M)	0.00000000200000.0		Cmpd 16579, AutoMSn(1012.0188), 184.5 min (13229323981823851)	13A/AvB	0.203	16A/AvB	0.236	27A/AvB	0.212	29A/AvB	0.234	10B/AvB	0.297	21B/AvB	0.316	25B/AvB	0.168	37B/AvB	0.219	113	6253.77	114	4268.62	115	4962.61
1	Q9TV62	Myosin-4 OS=Sus scrofa GN=MYH4 PE=2 SV=1	30936	287893	1373	1373	114	114	115730	1	1	0	1012.02	2022.02	2	2022.02	-0.0016	0	56.47	1.4e-05	R	LQNEVEDLMLDVER	S	Oxidation (M)	0.00000000200000.0		Cmpd 16971, AutoMSn(1012.0188), 189.0 min (13229323981824635)	13A/AvB	0.194	16A/AvB	0.244	27A/AvB	0.198	29A/AvB	0.227	10B/AvB	0.219	21B/AvB	0.312	25B/AvB	0.192	37B/AvB	0.276	113	58975.2	114	52102.1	115	65618.6
1	Q9TV62	Myosin-4 OS=Sus scrofa GN=MYH4 PE=2 SV=1	30936	287893	1373	1373	114	114	115732	1	1	0	1012.02	2022.02	2	2022.02	-0.0014	0	65.51	1.7e-06	R	LQNEVEDLMLDVER	S	Oxidation (M)	0.00000000200000.0		Cmpd 17241, AutoMSn(1012.0189), 193.3 min (13229323981563098)	13A/AvB	0.229	16A/AvB	0.217	27A/AvB	0.187	29A/AvB	0.238	10B/AvB	0.197	21B/AvB	0.362	25B/AvB	0.187	37B/AvB	0.255	113	33918	114	39400.7	115	37466.2
1	Q9TV62	Myosin-4 OS=Sus scrofa GN=MYH4 PE=2 SV=1	30936	287893	1373	1373	114	114	115733	1	1	0	1012.02	2022.02	2	2022.02	-0.0014	0	67.77	1e-06	R	LQNEVEDLMLDVER	S	Oxidation (M)	0.00000000200000.0		Cmpd 17177, AutoMSn(1012.0189), 191.3 min (13229323981825047)	13A/AvB	0.192	16A/AvB	0.226	27A/AvB	0.213	29A/AvB	0.209	10B/AvB	0.214	21B/AvB	0.306	25B/AvB	0.183	37B/AvB	0.298	113	48274.8	114	43318	115	50963.5
1	Q9TV62	Myosin-4 OS=Sus scrofa GN=MYH4 PE=2 SV=1	30936	287893	1373	1373	114	114	115735	1	1	0	1012.02	2022.02	2	2022.02	-0.0013	0	23.15	0.03	R	LQNEVEDLMLDVER	S	Oxidation (M)	0.00000000200000.0		Cmpd 16614, AutoMSn(1012.0189), 186.1 min (13229323981561844)	13A/AvB	0.028	16A/AvB	0.129	27A/AvB	0.326	29A/AvB	0.133	10B/AvB	0.281	21B/AvB	0.314	25B/AvB	0.236	37B/AvB	0.169	113	3181.86	114	319.609	115	1464.53
1	Q9TV62	Myosin-4 OS=Sus scrofa GN=MYH4 PE=2 SV=1	30936	287893	1373	1373	114	114	115736	1	1	0	1012.02	2022.02	2	2022.02	-0.0013	0	76.79	1.3e-07	R	LQNEVEDLMLDVER	S	Oxidation (M)	0.00000000200000.0		Cmpd 16986, AutoMSn(1012.0189), 190.3 min (13229323981873326)	13A/AvB	0.236	16A/AvB	0.212	27A/AvB	0.187	29A/AvB	0.211	10B/AvB	0.223	21B/AvB	0.309	25B/AvB	0.18	37B/AvB	0.288	113	30853.8	114	32566.1	115	29237.5
1	Q9TV62	Myosin-4 OS=Sus scrofa GN=MYH4 PE=2 SV=1	30936	287893	1373	1373	114	114	115737	1	1	0	1012.02	2022.02	2	2022.02	-0.0013	0	59.1	7.5e-06	R	LQNEVEDLMLDVER	S	Oxidation (M)	0.00000000200000.0		Cmpd 17001, AutoMSn(1012.0189), 190.6 min (13229323981562618)	13A/AvB	0.225	16A/AvB	0.203	27A/AvB	0.17	29A/AvB	0.213	10B/AvB	0.21	21B/AvB	0.298	25B/AvB	0.188	37B/AvB	0.304	113	34246.9	114	36694.4	115	33225.6
1	Q9TV62	Myosin-4 OS=Sus scrofa GN=MYH4 PE=2 SV=1	30936	287893	1373	1373	114	114	115738	1	1	0	675.015	2022.02	3	2022.02	-0.0012	0	48.5	8.6e-05	R	LQNEVEDLMLDVER	S	Oxidation (M)	0.00000000200000.0		Cmpd 16964, AutoMSn(675.0151), 192.0 min (13229323981727331)	13A/AvB	0.386	16A/AvB	0.497	27A/AvB	-0.024	29A/AvB	0.234	10B/AvB	0.348	21B/AvB	0.354	25B/AvB	0.298	37B/AvB	0	113	960.475	114	1064.57	115	1371.13
1	Q9TV62	Myosin-4 OS=Sus scrofa GN=MYH4 PE=2 SV=1	30936	287893	1373	1373	114	114	115739	1	1	0	675.015	2022.02	3	2022.02	-0.0012	0	51.59	3.3e-05	R	LQNEVEDLMLDVER	S	Oxidation (M)	0.00000000200000.0		Cmpd 16712, AutoMSn(675.0151), 189.2 min (13229323981726827)	13A/AvB	0.254	16A/AvB	0.362	27A/AvB	0.221	29A/AvB	0.315	10B/AvB	0.503	21B/AvB	0.124	25B/AvB	0.155	37B/AvB	0.217	113	1101.29	114	556.181	115	791.109
1	Q9TV62	Myosin-4 OS=Sus scrofa GN=MYH4 PE=2 SV=1	30936	287893	1373	1373	114	114	115740	1	1	0	1012.02	2022.02	2	2022.02	-0.0011	0	67.18	1.2e-06	R	LQNEVEDLMLDVER	S	Oxidation (M)	0.00000000200000.0		Cmpd 17003, AutoMSn(1012.0191), 190.4 min (13229323981873360)	13A/AvB	0.224	16A/AvB	0.228	27A/AvB	0.194	29A/AvB	0.254	10B/AvB	0.225	21B/AvB	0.289	25B/AvB	0.196	37B/AvB	0.29	113	32567.4	114	32407.8	115	33025.5
1	Q9TV62	Myosin-4 OS=Sus scrofa GN=MYH4 PE=2 SV=1	30936	287893	1373	1373	114	114	115743	1	1	0	1012.02	2022.02	2	2022.02	-0.0009	0	66.7	1.3e-06	R	LQNEVEDLMLDVER	S	Oxidation (M)	0.00000000200000.0		Cmpd 16955, AutoMSn(1012.0191), 188.8 min (13229323981824603)	13A/AvB	0.241	16A/AvB	0.217	27A/AvB	0.199	29A/AvB	0.233	10B/AvB	0.227	21B/AvB	0.303	25B/AvB	0.188	37B/AvB	0.281	113	52489	114	55688.7	115	50053.2
1	Q9TV62	Myosin-4 OS=Sus scrofa GN=MYH4 PE=2 SV=1	30936	287893	1373	1373	114	114	115746	1	1	0	1012.02	2022.02	2	2022.02	-0.0008	0	66.5	1.4e-06	R	LQNEVEDLMLDVER	S	Oxidation (M)	0.00000000200000.0		Cmpd 16770, AutoMSn(1012.0192), 187.8 min (13229323981872894)	13A/AvB	0.207	16A/AvB	0.243	27A/AvB	0.196	29A/AvB	0.241	10B/AvB	0.245	21B/AvB	0.312	25B/AvB	0.186	37B/AvB	0.257	113	38841.4	114	32763	115	38523.7
1	Q9TV62	Myosin-4 OS=Sus scrofa GN=MYH4 PE=2 SV=1	30936	287893	1373	1373	114	114	116061	1	1	0	678.693	2033.06	3	2033.06	-0.0055	0	14.2	0.047	K	AITDAAMMAEELK	K	2 Oxidation (M)	0.0000002200000.0		Cmpd 13474, AutoMSn(678.6932), 150.3 min (13229323981866302)	13A/AvB	0.22	16A/AvB	0.413	27A/AvB	0.195	29A/AvB	0.18	10B/AvB	0.374	21B/AvB	0.258	25B/AvB	0.086	37B/AvB	0.282	113	5120.78	114	3014.01	115	5646.04
1	Q9TV62	Myosin-4 OS=Sus scrofa GN=MYH4 PE=2 SV=1	30936	287893	1373	1373	114	114	116132	1	1	0	679.394	2035.16	3	2035.17	-0.0071	1	21.95	0.0087	K	KGSSFQTVSALFR	E				Cmpd 15713, AutoMSn(679.3941), 177.5 min (13229323981773918)	13A/AvB	-0.065	16A/AvB	0.017	27A/AvB	0.128	29A/AvB	0.221	10B/AvB	0.867	21B/AvB	-0.001	25B/AvB	-0.007	37B/AvB	0.14	113	24504.3	114	-1825.14	115	480.554
1	Q9TV62	Myosin-4 OS=Sus scrofa GN=MYH4 PE=2 SV=1	30936	287893	1373	1373	114	114	116133	1	1	0	679.394	2035.16	3	2035.17	-0.0071	1	15.71	0.034	K	KGSSFQTVSALFR	E				Cmpd 15285, AutoMSn(679.3941), 170.9 min (13229323981869924)	13A/AvB	0.184	16A/AvB	0.111	27A/AvB	0.169	29A/AvB	0.177	10B/AvB	0.341	21B/AvB	0.261	25B/AvB	0.16	37B/AvB	0.239	113	20433.3	114	11018.5	115	6645.18
1	Q9TV62	Myosin-4 OS=Sus scrofa GN=MYH4 PE=2 SV=1	30936	287893	1373	1373	114	114	116481	1	1	0	513.529	2050.09	4	2050.09	-0.008	0	21.03	0.011	K	TPGAMEHELVLHQLR	C	Oxidation (M)	0.000020000000000.0		Cmpd 10412, AutoMSn(513.5287), 115.8 min (13229323981860178)	13A/AvB	0.258	16A/AvB	0.313	27A/AvB	0.302	29A/AvB	0.14	10B/AvB	0.348	21B/AvB	0.394	25B/AvB	0.123	37B/AvB	0.134	113	36696.5	114	27227.7	115	32971.1
1	Q9TV62	Myosin-4 OS=Sus scrofa GN=MYH4 PE=2 SV=1	30936	287893	1373	1373	114	114	116482	1	1	0	513.529	2050.09	4	2050.09	-0.007	0	34.92	0.00053	K	TPGAMEHELVLHQLR	C	Oxidation (M)	0.000020000000000.0		Cmpd 10481, AutoMSn(513.5290), 116.6 min (13229323981860316)	13A/AvB	0.314	16A/AvB	0.308	27A/AvB	0.343	29A/AvB	0.186	10B/AvB	0.301	21B/AvB	0.384	25B/AvB	0.128	37B/AvB	0.187	113	53606.8	114	55889.8	115	54732.3
1	Q9TV62	Myosin-4 OS=Sus scrofa GN=MYH4 PE=2 SV=1	30936	287893	1373	1373	114	114	116486	1	1	0	513.529	2050.09	4	2050.09	-0.0048	0	27.99	0.0024	K	TPGAMEHELVLHQLR	C	Oxidation (M)	0.000020000000000.0		Cmpd 11978, AutoMSn(513.5294), 135.2 min (13229323981717359)	13A/AvB	0.216	16A/AvB	0.279	27A/AvB	0.18	29A/AvB	0.188	10B/AvB	0.378	21B/AvB	0.424	25B/AvB	0.061	37B/AvB	0.137	113	6665.4	114	3813.22	115	4917.94
1	Q9TV62	Myosin-4 OS=Sus scrofa GN=MYH4 PE=2 SV=1	30936	287893	1373	1373	114	114	116490	1	1	0	513.53	2050.09	4	2050.09	-0.0043	0	20.82	0.011	K	TPGAMEHELVLHQLR	C	Oxidation (M)	0.000020000000000.0		Cmpd 11836, AutoMSn(513.5296), 133.5 min (13229323981717075)	13A/AvB	0.137	16A/AvB	0.192	27A/AvB	0.314	29A/AvB	0.148	10B/AvB	0.355	21B/AvB	0.414	25B/AvB	0.117	37B/AvB	0.115	113	5038.92	114	1952.19	115	2727.65
1	Q9TV62	Myosin-4 OS=Sus scrofa GN=MYH4 PE=2 SV=1	30936	287893	1373	1373	114	114	116491	1	1	0	513.53	2050.09	4	2050.09	-0.0041	0	14.86	0.04	K	TPGAMEHELVLHQLR	C	Oxidation (M)	0.000020000000000.0		Cmpd 11699, AutoMSn(513.5297), 130.3 min (13229323981552014)	13A/AvB	0.397	16A/AvB	0.434	27A/AvB	0.19	29A/AvB	0.184	10B/AvB	0.294	21B/AvB	0.405	25B/AvB	0.088	37B/AvB	0.214	113	10089.2	114	13629.3	115	14873.8
1	Q9TV62	Myosin-4 OS=Sus scrofa GN=MYH4 PE=2 SV=1	30936	287893	1373	1373	114	114	116492	1	1	0	513.53	2050.09	4	2050.09	-0.0041	0	30.84	0.0013	K	TPGAMEHELVLHQLR	C	Oxidation (M)	0.000020000000000.0		Cmpd 10553, AutoMSn(513.5297), 117.4 min (13229323981860460)	13A/AvB	0.232	16A/AvB	0.267	27A/AvB	0.301	29A/AvB	0.159	10B/AvB	0.306	21B/AvB	0.406	25B/AvB	0.115	37B/AvB	0.173	113	44484.4	114	33756.4	115	38913.7
1	Q9TV62	Myosin-4 OS=Sus scrofa GN=MYH4 PE=2 SV=1	30936	287893	1373	1373	114	114	116493	1	1	0	513.53	2050.09	4	2050.09	-0.0038	0	38.72	0.00023	K	TPGAMEHELVLHQLR	C	Oxidation (M)	0.000020000000000.0		Cmpd 11927, AutoMSn(513.5297), 134.4 min (13229323981766346)	13A/AvB	-0.067	16A/AvB	0.105	27A/AvB	0.383	29A/AvB	-0.008	10B/AvB	0.879	21B/AvB	0.037	25B/AvB	-0.021	37B/AvB	0.105	113	38789.6	114	-2967.6	115	4641.76
1	Q9TV62	Myosin-4 OS=Sus scrofa GN=MYH4 PE=2 SV=1	30936	287893	1373	1373	114	114	116496	1	1	0	513.53	2050.09	4	2050.09	-0.0036	0	36.5	0.00038	K	TPGAMEHELVLHQLR	C	Oxidation (M)	0.000020000000000.0		Cmpd 11860, AutoMSn(513.5298), 132.2 min (13229323981552336)	13A/AvB	0.287	16A/AvB	0.357	27A/AvB	0.274	29A/AvB	0.162	10B/AvB	0.335	21B/AvB	0.402	25B/AvB	0.103	37B/AvB	0.16	113	13642.8	114	11695.2	115	14544.5
1	Q9TV62	Myosin-4 OS=Sus scrofa GN=MYH4 PE=2 SV=1	30936	287893	1373	1373	114	114	116498	1	1	0	513.53	2050.09	4	2050.09	-0.0033	0	20.86	0.011	K	TPGAMEHELVLHQLR	C	Oxidation (M)	0.000020000000000.0		Cmpd 11999, AutoMSn(513.5298), 135.2 min (13229323981766490)	13A/AvB	-0.094	16A/AvB	1.854	27A/AvB	0.094	29A/AvB	-0.003	10B/AvB	0.769	21B/AvB	0.011	25B/AvB	-0.007	37B/AvB	0.227	113	15039.7	114	-1847.04	115	36250.8
1	Q9TV62	Myosin-4 OS=Sus scrofa GN=MYH4 PE=2 SV=1	30936	287893	1373	1373	114	114	116502	1	1	0	513.53	2050.09	4	2050.09	-0.0016	0	36.3	0.00039	K	TPGAMEHELVLHQLR	C	Oxidation (M)	0.000020000000000.0		Cmpd 11908, AutoMSn(513.5303), 134.3 min (13229323981717219)	13A/AvB	0.156	16A/AvB	0.308	27A/AvB	0.306	29A/AvB	0.232	10B/AvB	0.327	21B/AvB	0.489	25B/AvB	0.019	37B/AvB	0.164	113	5806	114	2762.8	115	5455.42
1	Q9TV62	Myosin-4 OS=Sus scrofa GN=MYH4 PE=2 SV=1	30936	287893	1373	1373	114	114	116662	1	1	0	516.049	2060.17	4	2060.18	-0.013	1	16.33	0.029	R	SNAACAALDKK	Q				Cmpd 8375, AutoMSn(516.0494), 93.3 min (13229323981856104)	13A/AvB	0.188	16A/AvB	0.213	27A/AvB	0.241	29A/AvB	0.189	10B/AvB	0.28	21B/AvB	0.295	25B/AvB	0.191	37B/AvB	0.234	113	180640	114	121256	115	137550
1	Q9TV62	Myosin-4 OS=Sus scrofa GN=MYH4 PE=2 SV=1	30936	287893	1373	1373	114	114	116663	1	1	0	516.049	2060.17	4	2060.18	-0.0127	1	15.65	0.034	R	SNAACAALDKK	Q				Cmpd 8453, AutoMSn(516.0495), 94.2 min (13229323981856260)	13A/AvB	0.197	16A/AvB	0.227	27A/AvB	0.234	29A/AvB	0.196	10B/AvB	0.266	21B/AvB	0.306	25B/AvB	0.169	37B/AvB	0.259	113	147169	114	108925	115	125541
1	Q9TV62	Myosin-4 OS=Sus scrofa GN=MYH4 PE=2 SV=1	30936	287893	1373	1373	114	114	116664	1	1	0	516.05	2060.17	4	2060.18	-0.012	1	21.4	0.0098	R	SNAACAALDKK	Q				Cmpd 8901, AutoMSn(516.0497), 98.3 min (13229323981808495)	13A/AvB	0.206	16A/AvB	0.254	27A/AvB	0.217	29A/AvB	0.191	10B/AvB	0.269	21B/AvB	0.339	25B/AvB	0.158	37B/AvB	0.233	113	63021.8	114	48258.4	115	59441
1	Q9TV62	Myosin-4 OS=Sus scrofa GN=MYH4 PE=2 SV=1	30936	287893	1373	1373	114	114	116665	1	1	0	516.05	2060.17	4	2060.18	-0.0115	1	23.91	0.0057	R	SNAACAALDKK	Q				Cmpd 9179, AutoMSn(516.0498), 103.2 min (13229323981760850)	13A/AvB	-0.059	16A/AvB	0.025	27A/AvB	0.313	29A/AvB	-0.007	10B/AvB	0.784	21B/AvB	0.065	25B/AvB	-0.019	37B/AvB	0.169	113	94866.6	114	-7088.93	115	2999.46
1	Q9TV62	Myosin-4 OS=Sus scrofa GN=MYH4 PE=2 SV=1	30936	287893	1373	1373	114	114	116667	1	1	0	516.05	2060.17	4	2060.18	-0.011	1	25.72	0.0039	R	SNAACAALDKK	Q				Cmpd 9308, AutoMSn(516.0499), 104.7 min (13229323981712019)	13A/AvB	0.149	16A/AvB	0.258	27A/AvB	0.2	29A/AvB	0.2	10B/AvB	0.279	21B/AvB	0.298	25B/AvB	0.184	37B/AvB	0.239	113	18678	114	9977.43	115	17238.5
1	Q9TV62	Myosin-4 OS=Sus scrofa GN=MYH4 PE=2 SV=1	30936	287893	1373	1373	114	114	116668	1	1	0	516.05	2060.17	4	2060.18	-0.011	1	21.77	0.0091	R	SNAACAALDKK	Q				Cmpd 8828, AutoMSn(516.0499), 97.5 min (13229323981808349)	13A/AvB	0.188	16A/AvB	0.209	27A/AvB	0.24	29A/AvB	0.19	10B/AvB	0.248	21B/AvB	0.319	25B/AvB	0.188	37B/AvB	0.245	113	96180.7	114	73082.2	115	81207
1	Q9TV62	Myosin-4 OS=Sus scrofa GN=MYH4 PE=2 SV=1	30936	287893	1373	1373	114	114	116669	1	1	0	516.05	2060.17	4	2060.18	-0.0108	1	18.23	0.019	R	SNAACAALDKK	Q				Cmpd 9277, AutoMSn(516.0500), 104.4 min (13229323981711957)	13A/AvB	0.201	16A/AvB	0.233	27A/AvB	0.22	29A/AvB	0.226	10B/AvB	0.208	21B/AvB	0.361	25B/AvB	0.184	37B/AvB	0.247	113	13412.5	114	12960.8	115	15016.3
1	Q9TV62	Myosin-4 OS=Sus scrofa GN=MYH4 PE=2 SV=1	30936	287893	1373	1373	114	114	116670	1	1	0	516.05	2060.17	4	2060.18	-0.0105	1	22.59	0.0076	R	SNAACAALDKK	Q				Cmpd 9068, AutoMSn(516.0500), 100.7 min (13229323981546752)	13A/AvB	0.229	16A/AvB	0.262	27A/AvB	0.299	29A/AvB	0.178	10B/AvB	0.301	21B/AvB	0.318	25B/AvB	0.151	37B/AvB	0.23	113	40457.9	114	30722.4	115	35139.2
1	Q9TV62	Myosin-4 OS=Sus scrofa GN=MYH4 PE=2 SV=1	30936	287893	1373	1373	114	114	116671	1	1	0	516.05	2060.17	4	2060.18	-0.0103	1	26.71	0.0031	R	SNAACAALDKK	Q				Cmpd 9325, AutoMSn(516.0501), 104.8 min (13229323981761142)	13A/AvB	0.323	16A/AvB	1.995	27A/AvB	0.047	29A/AvB	-0.002	10B/AvB	0.521	21B/AvB	0.086	25B/AvB	-0.008	37B/AvB	0.401	113	19014.9	114	11797	115	72799
1	Q9TV62	Myosin-4 OS=Sus scrofa GN=MYH4 PE=2 SV=1	30936	287893	1373	1373	114	114	116672	1	1	0	516.05	2060.17	4	2060.18	-0.01	1	25.74	0.0039	R	SNAACAALDKK	Q				Cmpd 9251, AutoMSn(516.0502), 104.0 min (13229323981760994)	13A/AvB	-0.035	16A/AvB	0.01	27A/AvB	0.306	29A/AvB	-0.004	10B/AvB	0.467	21B/AvB	0.372	25B/AvB	-0.027	37B/AvB	0.188	113	76254.4	114	-5683.26	115	1675.87
1	Q9TV62	Myosin-4 OS=Sus scrofa GN=MYH4 PE=2 SV=1	30936	287893	1373	1373	114	114	116673	1	1	0	516.05	2060.17	4	2060.18	-0.01	1	25.51	0.004	R	SNAACAALDKK	Q				Cmpd 9140, AutoMSn(516.0502), 101.5 min (13229323981546896)	13A/AvB	0.214	16A/AvB	0.215	27A/AvB	0.227	29A/AvB	0.216	10B/AvB	0.233	21B/AvB	0.307	25B/AvB	0.198	37B/AvB	0.262	113	44690.4	114	41061.9	115	41238.3
1	Q9TV62	Myosin-4 OS=Sus scrofa GN=MYH4 PE=2 SV=1	30936	287893	1373	1373	114	114	116677	1	1	0	516.05	2060.17	4	2060.18	-0.0095	1	26.55	0.0032	R	SNAACAALDKK	Q				Cmpd 9236, AutoMSn(516.0503), 103.9 min (13229323981711875)	13A/AvB	0.166	16A/AvB	0.196	27A/AvB	0.209	29A/AvB	0.167	10B/AvB	0.256	21B/AvB	0.224	25B/AvB	0.24	37B/AvB	0.279	113	22422.1	114	14529.9	115	17144.4
1	Q9TV62	Myosin-4 OS=Sus scrofa GN=MYH4 PE=2 SV=1	30936	287893	1373	1373	114	114	117002	1	1	0	692.064	2073.17	3	2073.18	-0.0105	0	21.65	0.013	K	LASADIETYLLEK	S				Cmpd 17619, AutoMSn(692.0644), 199.5 min (13229323981728641)	13A/AvB	0.365	16A/AvB	0.513	27A/AvB	0.689	29A/AvB	0.66	10B/AvB	0.441	21B/AvB	-0.039	25B/AvB	0.274	37B/AvB	0.324	113	685.545	114	567.504	115	797.187
1	Q9TV62	Myosin-4 OS=Sus scrofa GN=MYH4 PE=2 SV=1	30936	287893	1373	1373	114	114	117004	1	1	0	692.065	2073.17	3	2073.18	-0.0083	0	26.7	0.02	K	LASADIETYLLEK	S				Cmpd 17707, AutoMSn(692.0651), 200.3 min (13229323981777906)	13A/AvB	-0.059	16A/AvB	0.002	27A/AvB	0.286	29A/AvB	-0.006	10B/AvB	0.8	21B/AvB	-0.009	25B/AvB	0.209	37B/AvB	0	113	6801.7	114	-504.225	115	15.5187
1	Q9TV62	Myosin-4 OS=Sus scrofa GN=MYH4 PE=2 SV=1	30936	287893	1373	1373	114	114	117005	1	1	0	692.065	2073.17	3	2073.18	-0.0081	0	38.32	0.00082	K	LASADIETYLLEK	S				Cmpd 17890, AutoMSn(692.0652), 200.7 min (13229323981564396)	13A/AvB	0.247	16A/AvB	0.174	27A/AvB	0.219	29A/AvB	0.345	10B/AvB	0.209	21B/AvB	0.332	25B/AvB	0.155	37B/AvB	0.303	113	1870.57	114	2212.77	115	1555.26
1	Q9TV62	Myosin-4 OS=Sus scrofa GN=MYH4 PE=2 SV=1	30936	287893	1373	1373	114	114	117006	1	1	0	692.065	2073.17	3	2073.18	-0.0081	0	38.48	0.0013	K	LASADIETYLLEK	S				Cmpd 17690, AutoMSn(692.0652), 198.3 min (13229323981874734)	13A/AvB	0.237	16A/AvB	0.229	27A/AvB	0.226	29A/AvB	0.196	10B/AvB	0.385	21B/AvB	0.232	25B/AvB	0.17	37B/AvB	0.212	113	8608	114	5293.07	115	5124.98
1	Q9TV62	Myosin-4 OS=Sus scrofa GN=MYH4 PE=2 SV=1	30936	287893	1373	1373	114	114	117008	1	1	0	692.065	2073.17	3	2073.18	-0.0079	0	32.57	0.0048	K	LASADIETYLLEK	S				Cmpd 17918, AutoMSn(692.0653), 199.7 min (13229323981826529)	13A/AvB	0.305	16A/AvB	0.277	27A/AvB	0.185	29A/AvB	0.235	10B/AvB	0.224	21B/AvB	0.208	25B/AvB	0.208	37B/AvB	0.359	113	3122.81	114	4239.16	115	3851.89
1	Q9TV62	Myosin-4 OS=Sus scrofa GN=MYH4 PE=2 SV=1	30936	287893	1373	1373	114	114	117009	1	1	0	692.065	2073.17	3	2073.18	-0.0079	0	41.42	0.00062	K	LASADIETYLLEK	S				Cmpd 17890, AutoMSn(692.0653), 199.4 min (13229323981826473)	13A/AvB	0.316	16A/AvB	0.217	27A/AvB	0.251	29A/AvB	0.325	10B/AvB	0.358	21B/AvB	0.256	25B/AvB	0.158	37B/AvB	0.228	113	7229.51	114	6377.96	115	4382.22
1	Q9TV62	Myosin-4 OS=Sus scrofa GN=MYH4 PE=2 SV=1	30936	287893	1373	1373	114	114	117010	1	1	0	692.065	2073.17	3	2073.18	-0.0078	0	16.8	0.03	K	LASADIETYLLEK	S				Cmpd 17816, AutoMSn(692.0653), 198.6 min (13229323981826325)	13A/AvB	0.126	16A/AvB	0.23	27A/AvB	0.248	29A/AvB	0.211	10B/AvB	0.436	21B/AvB	0.221	25B/AvB	0.211	37B/AvB	0.131	113	8256.3	114	2379.86	115	4354.88
1	Q9TV62	Myosin-4 OS=Sus scrofa GN=MYH4 PE=2 SV=1	30936	287893	1373	1373	114	114	117012	1	1	0	692.065	2073.17	3	2073.18	-0.0074	0	55.13	2.9e-05	K	LASADIETYLLEK	S				Cmpd 17843, AutoMSn(692.0655), 198.9 min (13229323981826379)	13A/AvB	0.289	16A/AvB	0.303	27A/AvB	0.217	29A/AvB	0.218	10B/AvB	0.319	21B/AvB	0.227	25B/AvB	0.191	37B/AvB	0.263	113	9925.26	114	8979.68	115	9417.35
1	Q9TV62	Myosin-4 OS=Sus scrofa GN=MYH4 PE=2 SV=1	30936	287893	1373	1373	114	114	117178	1	1	0	695.74	2084.2	3	2084.21	-0.0118	0	59.15	1.1e-05	K	AAYLQGLNSADLLK	A				Cmpd 16251, AutoMSn(695.7397), 183.9 min (13229323981725905)	13A/AvB	0.199	16A/AvB	0.391	27A/AvB	0.305	29A/AvB	0.107	10B/AvB	0.242	21B/AvB	0.444	25B/AvB	0.129	37B/AvB	0.185	113	779.552	114	641.498	115	1260.43
1	Q9TV62	Myosin-4 OS=Sus scrofa GN=MYH4 PE=2 SV=1	30936	287893	1373	1373	114	114	117179	1	1	0	522.057	2084.2	4	2084.21	-0.0089	0	46.91	4e-05	K	AAYLQGLNSADLLK	A				Cmpd 16520, AutoMSn(522.0573), 183.9 min (13229323981823733)	13A/AvB	0.272	16A/AvB	0.256	27A/AvB	0.222	29A/AvB	0.18	10B/AvB	0.326	21B/AvB	0.361	25B/AvB	0.123	37B/AvB	0.19	113	9481.64	114	7914.75	115	7446.69
1	Q9TV62	Myosin-4 OS=Sus scrofa GN=MYH4 PE=2 SV=1	30936	287893	1373	1373	114	114	117180	1	1	0	695.741	2084.2	3	2084.21	-0.0089	0	33.8	0.00068	K	AAYLQGLNSADLLK	A				Cmpd 16310, AutoMSn(695.7407), 184.3 min (13229323981775112)	13A/AvB	-0.076	16A/AvB	0.002	27A/AvB	0.488	29A/AvB	-0.01	10B/AvB	1.024	21B/AvB	0.001	25B/AvB	-0.025	37B/AvB	0	113	5691.79	114	-421.926	115	12.0603
1	Q9TV62	Myosin-4 OS=Sus scrofa GN=MYH4 PE=2 SV=1	30936	287893	1373	1373	114	114	117182	1	1	0	1043.11	2084.2	2	2084.21	-0.0081	0	21.73	0.0092	K	AAYLQGLNSADLLK	A				Cmpd 16577, AutoMSn(1043.1078), 185.7 min (13229323981561770)	13A/AvB	0.111	16A/AvB	0.212	27A/AvB	0.309	29A/AvB	0.224	10B/AvB	0.386	21B/AvB	0.211	25B/AvB	0.114	37B/AvB	0.289	113	3246.69	114	936.41	115	1778.82
1	Q9TV62	Myosin-4 OS=Sus scrofa GN=MYH4 PE=2 SV=1	30936	287893	1373	1373	114	114	117183	1	1	0	695.741	2084.2	3	2084.21	-0.0078	0	76.63	2.1e-07	K	AAYLQGLNSADLLK	A				Cmpd 16403, AutoMSn(695.7410), 185.4 min (13229323981775298)	13A/AvB	-0.042	16A/AvB	0.439	27A/AvB	-0.023	29A/AvB	0.209	10B/AvB	0.442	21B/AvB	-0.037	25B/AvB	0.345	37B/AvB	0.25	113	5020.4	114	-472.654	115	4982.08
1	Q9TV62	Myosin-4 OS=Sus scrofa GN=MYH4 PE=2 SV=1	30936	287893	1373	1373	114	114	117184	1	1	0	695.741	2084.2	3	2084.21	-0.0076	0	69.87	1e-06	K	AAYLQGLNSADLLK	A				Cmpd 16322, AutoMSn(695.7411), 184.7 min (13229323981726047)	13A/AvB	0.148	16A/AvB	0.233	27A/AvB	0.244	29A/AvB	0.516	10B/AvB	0.317	21B/AvB	0.249	25B/AvB	0.186	37B/AvB	0.248	113	1620.44	114	754.793	115	1191.15
1	Q9TV62	Myosin-4 OS=Sus scrofa GN=MYH4 PE=2 SV=1	30936	287893	1373	1373	114	114	117185	1	1	0	695.741	2084.2	3	2084.21	-0.0075	0	65.64	2.6e-06	K	AAYLQGLNSADLLK	A				Cmpd 16571, AutoMSn(695.7411), 184.5 min (13229323981823835)	13A/AvB	0.144	16A/AvB	0.302	27A/AvB	0.273	29A/AvB	0.31	10B/AvB	0.278	21B/AvB	0.229	25B/AvB	0.15	37B/AvB	0.343	113	9353.45	114	4835.47	115	10136
1	Q9TV62	Myosin-4 OS=Sus scrofa GN=MYH4 PE=2 SV=1	30936	287893	1373	1373	114	114	117186	1	1	0	695.741	2084.2	3	2084.21	-0.0073	0	59.34	5.8e-06	K	AAYLQGLNSADLLK	A				Cmpd 16469, AutoMSn(695.7412), 183.3 min (13229323981823631)	13A/AvB	0.165	16A/AvB	0.184	27A/AvB	0.153	29A/AvB	0.199	10B/AvB	0.335	21B/AvB	0.232	25B/AvB	0.2	37B/AvB	0.233	113	12494.9	114	6165.61	115	6866.14
1	Q9TV62	Myosin-4 OS=Sus scrofa GN=MYH4 PE=2 SV=1	30936	287893	1373	1373	114	114	117187	1	1	0	695.741	2084.2	3	2084.21	-0.0069	0	56.25	2.3e-05	K	AAYLQGLNSADLLK	A				Cmpd 16331, AutoMSn(695.7413), 184.6 min (13229323981775154)	13A/AvB	-0.038	16A/AvB	0.001	27A/AvB	-0.012	29A/AvB	0	10B/AvB	0.508	21B/AvB	-0.015	25B/AvB	0.379	37B/AvB	0.128	113	8543.07	114	-633.363	115	21.8093
1	Q9TV62	Myosin-4 OS=Sus scrofa GN=MYH4 PE=2 SV=1	30936	287893	1373	1373	114	114	117188	1	1	0	695.741	2084.2	3	2084.21	-0.0069	0	69.83	1e-06	K	AAYLQGLNSADLLK	A				Cmpd 16599, AutoMSn(695.7413), 186.0 min (13229323981561814)	13A/AvB	0.173	16A/AvB	0.117	27A/AvB	0.349	29A/AvB	0.233	10B/AvB	0.345	21B/AvB	0.302	25B/AvB	0.16	37B/AvB	0.192	113	5920.15	114	2974.6	115	2006.7
1	Q9TV62	Myosin-4 OS=Sus scrofa GN=MYH4 PE=2 SV=1	30936	287893	1373	1373	114	114	117189	1	1	0	695.741	2084.2	3	2084.21	-0.0067	0	60.72	4.4e-06	K	AAYLQGLNSADLLK	A				Cmpd 16405, AutoMSn(695.7414), 183.6 min (13229323981872164)	13A/AvB	0.142	16A/AvB	0.373	27A/AvB	0.184	29A/AvB	0.25	10B/AvB	0.277	21B/AvB	0.204	25B/AvB	0.162	37B/AvB	0.356	113	3087.25	114	1582.06	115	4147.35
1	Q9TV62	Myosin-4 OS=Sus scrofa GN=MYH4 PE=2 SV=1	30936	287893	1373	1373	114	114	117190	1	1	0	695.741	2084.2	3	2084.21	-0.0065	0	84.81	3.2e-08	K	AAYLQGLNSADLLK	A				Cmpd 16527, AutoMSn(695.7414), 185.2 min (13229323981561670)	13A/AvB	0.231	16A/AvB	0.214	27A/AvB	0.304	29A/AvB	0.321	10B/AvB	0.375	21B/AvB	0.252	25B/AvB	0.177	37B/AvB	0.195	113	4304.02	114	2644.39	115	2455.83
1	Q9TV62	Myosin-4 OS=Sus scrofa GN=MYH4 PE=2 SV=1	30936	287893	1373	1373	114	114	117191	1	1	0	695.742	2084.2	3	2084.21	-0.006	0	90.5	8.6e-09	K	AAYLQGLNSADLLK	A				Cmpd 16499, AutoMSn(695.7417), 183.6 min (13229323981823691)	13A/AvB	0.144	16A/AvB	0.179	27A/AvB	0.221	29A/AvB	0.227	10B/AvB	0.346	21B/AvB	0.198	25B/AvB	0.202	37B/AvB	0.254	113	19203.8	114	8019.82	115	9916.23
1	Q9TV62	Myosin-4 OS=Sus scrofa GN=MYH4 PE=2 SV=1	30936	287893	1373	1373	114	114	117192	1	1	0	695.742	2084.2	3	2084.21	-0.0058	0	94.31	3.5e-09	K	AAYLQGLNSADLLK	A				Cmpd 16332, AutoMSn(695.7417), 182.8 min (13229323981872018)	13A/AvB	0.168	16A/AvB	0.155	27A/AvB	0.293	29A/AvB	0.214	10B/AvB	0.319	21B/AvB	0.263	25B/AvB	0.168	37B/AvB	0.25	113	9183.36	114	4831.39	115	4472.18
1	Q9TV62	Myosin-4 OS=Sus scrofa GN=MYH4 PE=2 SV=1	30936	287893	1373	1373	114	114	117193	1	1	0	695.742	2084.2	3	2084.21	-0.0053	0	53.5	1.6e-05	K	AAYLQGLNSADLLK	A				Cmpd 16297, AutoMSn(695.7419), 182.4 min (13229323981871948)	13A/AvB	0.128	16A/AvB	0.255	27A/AvB	0.147	29A/AvB	0.178	10B/AvB	0.304	21B/AvB	0.286	25B/AvB	0.211	37B/AvB	0.199	113	4814.25	114	2022.02	115	4032.83
1	Q9TV62	Myosin-4 OS=Sus scrofa GN=MYH4 PE=2 SV=1	30936	287893	1373	1373	114	114	117638	1	1	0	525.554	2098.19	4	2098.2	-0.0109	1	36.81	0.00035	K	QAFTQQIEELKR	Q				Cmpd 14111, AutoMSn(525.5545), 156.6 min (13229323981818915)	13A/AvB	0.175	16A/AvB	0.216	27A/AvB	0.196	29A/AvB	0.26	10B/AvB	0.259	21B/AvB	0.27	25B/AvB	0.183	37B/AvB	0.288	113	39633.1	114	26889.7	115	33075.7
1	Q9TV62	Myosin-4 OS=Sus scrofa GN=MYH4 PE=2 SV=1	30936	287893	1373	1373	114	114	117639	1	1	0	525.554	2098.19	4	2098.2	-0.0107	1	34.17	0.00062	K	QAFTQQIEELKR	Q				Cmpd 14244, AutoMSn(525.5545), 160.8 min (13229323981770980)	13A/AvB	-0.038	16A/AvB	0.268	27A/AvB	0.415	29A/AvB	0.025	10B/AvB	0.441	21B/AvB	0.357	25B/AvB	-0.036	37B/AvB	0.238	113	17310.3	114	-1494.82	115	10505.6
1	Q9TV62	Myosin-4 OS=Sus scrofa GN=MYH4 PE=2 SV=1	30936	287893	1373	1373	114	114	117648	1	1	0	525.555	2098.19	4	2098.2	-0.0097	1	32.63	0.00087	K	QAFTQQIEELKR	Q				Cmpd 14255, AutoMSn(525.5548), 158.2 min (13229323981819203)	13A/AvB	0.215	16A/AvB	0.232	27A/AvB	0.212	29A/AvB	0.25	10B/AvB	0.287	21B/AvB	0.329	25B/AvB	0.158	37B/AvB	0.227	113	30766.3	114	23119.3	115	24960.6
1	Q9TV62	Myosin-4 OS=Sus scrofa GN=MYH4 PE=2 SV=1	30936	287893	1373	1373	114	114	117649	1	1	0	525.555	2098.19	4	2098.2	-0.0094	1	38.56	0.00024	K	QAFTQQIEELKR	Q				Cmpd 14183, AutoMSn(525.5548), 157.4 min (13229323981819059)	13A/AvB	0.204	16A/AvB	0.215	27A/AvB	0.21	29A/AvB	0.289	10B/AvB	0.259	21B/AvB	0.262	25B/AvB	0.187	37B/AvB	0.292	113	46223.6	114	36402	115	38369.9
1	Q9TV62	Myosin-4 OS=Sus scrofa GN=MYH4 PE=2 SV=1	30936	287893	1373	1373	114	114	117651	1	1	0	525.555	2098.19	4	2098.2	-0.009	1	40.97	0.00014	K	QAFTQQIEELKR	Q				Cmpd 13782, AutoMSn(525.5549), 153.8 min (13229323981866918)	13A/AvB	0.203	16A/AvB	0.225	27A/AvB	0.229	29A/AvB	0.249	10B/AvB	0.239	21B/AvB	0.3	25B/AvB	0.174	37B/AvB	0.287	113	23306	114	19755.3	115	21905
1	Q9TV62	Myosin-4 OS=Sus scrofa GN=MYH4 PE=2 SV=1	30936	287893	1373	1373	114	114	117658	1	1	0	700.405	2098.19	3	2098.2	-0.0076	1	13.97	0.049	K	QAFTQQIEELKR	Q				Cmpd 14213, AutoMSn(700.4046), 160.4 min (13229323981770918)	13A/AvB	0.195	16A/AvB	0.206	27A/AvB	-0.002	29A/AvB	0.244	10B/AvB	0.224	21B/AvB	0.556	25B/AvB	-0.024	37B/AvB	0.243	113	10535.1	114	9150.85	115	9672.45
1	Q9TV62	Myosin-4 OS=Sus scrofa GN=MYH4 PE=2 SV=1	30936	287893	1373	1373	114	114	117662	1	1	0	525.555	2098.19	4	2098.2	-0.0073	1	33.49	0.00072	K	QAFTQQIEELKR	Q				Cmpd 13854, AutoMSn(525.5554), 154.6 min (13229323981867062)	13A/AvB	0.192	16A/AvB	0.212	27A/AvB	0.226	29A/AvB	0.272	10B/AvB	0.234	21B/AvB	0.252	25B/AvB	0.183	37B/AvB	0.331	113	36330	114	29825.7	115	32924.5
1	Q9TV62	Myosin-4 OS=Sus scrofa GN=MYH4 PE=2 SV=1	30936	287893	1373	1373	114	114	117667	1	1	0	525.556	2098.19	4	2098.2	-0.0065	1	32.21	0.00095	K	QAFTQQIEELKR	Q				Cmpd 14171, AutoMSn(525.5556), 159.9 min (13229323981770834)	13A/AvB	-0.036	16A/AvB	0.207	27A/AvB	0.392	29A/AvB	0.044	10B/AvB	0.43	21B/AvB	0.416	25B/AvB	-0.037	37B/AvB	0.192	113	20767.1	114	-1741.19	115	10024.4
1	Q9TV62	Myosin-4 OS=Sus scrofa GN=MYH4 PE=2 SV=1	30936	287893	1373	1373	114	114	117668	1	1	0	700.405	2098.19	3	2098.2	-0.0063	1	15.92	0.032	K	QAFTQQIEELKR	Q				Cmpd 13824, AutoMSn(700.4050), 154.3 min (13229323981867002)	13A/AvB	0.208	16A/AvB	0.214	27A/AvB	0.222	29A/AvB	0.251	10B/AvB	0.256	21B/AvB	0.296	25B/AvB	0.173	37B/AvB	0.275	113	23453.6	114	19005.6	115	19618.6
1	Q9TV62	Myosin-4 OS=Sus scrofa GN=MYH4 PE=2 SV=1	30936	287893	1373	1373	114	114	118000	1	1	0	530.543	2118.14	4	2118.15	-0.0102	1	36.42	0.00038	R	KLQHELEEAEER	A				Cmpd 14063, AutoMSn(530.5430), 156.0 min (13229323981818819)	13A/AvB	0.191	16A/AvB	0.24	27A/AvB	0.229	29A/AvB	0.203	10B/AvB	0.376	21B/AvB	0.299	25B/AvB	0.15	37B/AvB	0.175	113	45916.5	114	23332.3	115	29322.7
1	Q9TV62	Myosin-4 OS=Sus scrofa GN=MYH4 PE=2 SV=1	30936	287893	1373	1373	114	114	118005	1	1	0	707.055	2118.14	3	2118.15	-0.0097	1	16.3	0.03	R	KLQHELEEAEER	A				Cmpd 13754, AutoMSn(707.0550), 152.5 min (13229323981818201)	13A/AvB	0.175	16A/AvB	0.221	27A/AvB	0.211	29A/AvB	0.223	10B/AvB	0.316	21B/AvB	0.302	25B/AvB	0.191	37B/AvB	0.19	113	10204.4	114	5659.15	115	7123.05
1	Q9TV62	Myosin-4 OS=Sus scrofa GN=MYH4 PE=2 SV=1	30936	287893	1373	1373	114	114	118013	1	1	0	707.055	2118.14	3	2118.15	-0.0088	1	21.31	0.01	R	KLQHELEEAEER	A				Cmpd 13825, AutoMSn(707.0554), 153.3 min (13229323981818343)	13A/AvB	0.198	16A/AvB	0.201	27A/AvB	0.18	29A/AvB	0.231	10B/AvB	0.286	21B/AvB	0.245	25B/AvB	0.197	37B/AvB	0.273	113	9687.56	114	6719	115	6800.73
1	Q9TV62	Myosin-4 OS=Sus scrofa GN=MYH4 PE=2 SV=1	30936	287893	1373	1373	114	114	118014	1	1	0	707.055	2118.14	3	2118.15	-0.0086	1	14.54	0.043	R	KLQHELEEAEER	A				Cmpd 13895, AutoMSn(707.0554), 154.1 min (13229323981818483)	13A/AvB	0.165	16A/AvB	0.191	27A/AvB	0.154	29A/AvB	0.253	10B/AvB	0.374	21B/AvB	0.244	25B/AvB	0.147	37B/AvB	0.236	113	16122.4	114	7139.78	115	8253.51
1	Q9TV62	Myosin-4 OS=Sus scrofa GN=MYH4 PE=2 SV=1	30936	287893	1373	1373	114	114	118015	1	1	0	530.543	2118.14	4	2118.15	-0.0085	1	22.29	0.0081	R	KLQHELEEAEER	A				Cmpd 14013, AutoMSn(530.5434), 158.3 min (13229323981721429)	13A/AvB	0.114	16A/AvB	0.333	27A/AvB	0.145	29A/AvB	0.246	10B/AvB	0.318	21B/AvB	0.378	25B/AvB	0.175	37B/AvB	0.129	113	3077.03	114	1102.63	115	3220.81
1	Q9TV62	Myosin-4 OS=Sus scrofa GN=MYH4 PE=2 SV=1	30936	287893	1373	1373	114	114	118016	1	1	0	530.543	2118.14	4	2118.15	-0.0085	1	23.4	0.0064	R	KLQHELEEAEER	A				Cmpd 14429, AutoMSn(530.5434), 162.9 min (13229323981771350)	13A/AvB	-0.035	16A/AvB	0.054	27A/AvB	0.009	29A/AvB	0.061	10B/AvB	0.452	21B/AvB	0.414	25B/AvB	-0.018	37B/AvB	0.151	113	23211.7	114	-1775.72	115	2772.89
1	Q9TV62	Myosin-4 OS=Sus scrofa GN=MYH4 PE=2 SV=1	30936	287893	1373	1373	114	114	118017	1	1	0	530.543	2118.14	4	2118.15	-0.0085	1	37.44	0.00031	R	KLQHELEEAEER	A				Cmpd 13991, AutoMSn(530.5434), 155.2 min (13229323981818675)	13A/AvB	0.163	16A/AvB	0.211	27A/AvB	0.235	29A/AvB	0.21	10B/AvB	0.322	21B/AvB	0.305	25B/AvB	0.147	37B/AvB	0.226	113	47728.3	114	24122	115	31279.7
1	Q9TV62	Myosin-4 OS=Sus scrofa GN=MYH4 PE=2 SV=1	30936	287893	1373	1373	114	114	118018	1	1	0	530.543	2118.14	4	2118.15	-0.0083	1	39.02	0.00022	R	KLQHELEEAEER	A				Cmpd 14201, AutoMSn(530.5435), 160.3 min (13229323981770894)	13A/AvB	-0.035	16A/AvB	0.006	27A/AvB	0.159	29A/AvB	0.199	10B/AvB	0.468	21B/AvB	0.388	25B/AvB	-0.025	37B/AvB	0.169	113	22381.4	114	-1664.03	115	290.745
1	Q9TV62	Myosin-4 OS=Sus scrofa GN=MYH4 PE=2 SV=1	30936	287893	1373	1373	114	114	118024	1	1	0	530.544	2118.15	4	2118.15	-0.0078	1	28.56	0.0021	R	KLQHELEEAEER	A				Cmpd 14345, AutoMSn(530.5436), 161.9 min (13229323981771182)	13A/AvB	-0.05	16A/AvB	0.076	27A/AvB	0.113	29A/AvB	0.232	10B/AvB	0.811	21B/AvB	0.021	25B/AvB	-0.007	37B/AvB	0.175	113	39596.1	114	-2432	115	3701.81
1	Q9TV62	Myosin-4 OS=Sus scrofa GN=MYH4 PE=2 SV=1	30936	287893	1373	1373	114	114	118025	1	1	0	530.544	2118.15	4	2118.15	-0.0078	1	30.92	0.0013	R	KLQHELEEAEER	A				Cmpd 14271, AutoMSn(530.5436), 159.5 min (13229323981557158)	13A/AvB	0.143	16A/AvB	0.194	27A/AvB	0.166	29A/AvB	0.179	10B/AvB	0.304	21B/AvB	0.355	25B/AvB	0.127	37B/AvB	0.214	113	18711.1	114	8825.78	115	11958.8
1	Q9TV62	Myosin-4 OS=Sus scrofa GN=MYH4 PE=2 SV=1	30936	287893	1373	1373	114	114	118027	1	1	0	707.056	2118.15	3	2118.15	-0.0077	1	15.81	0.033	R	KLQHELEEAEER	A				Cmpd 14006, AutoMSn(707.0557), 156.4 min (13229323981556628)	13A/AvB	0.164	16A/AvB	0.244	27A/AvB	0.119	29A/AvB	0.233	10B/AvB	0.375	21B/AvB	0.226	25B/AvB	0.133	37B/AvB	0.266	113	5484.51	114	2396.93	115	3562.19
1	Q9TV62	Myosin-4 OS=Sus scrofa GN=MYH4 PE=2 SV=1	30936	287893	1373	1373	114	114	118029	1	1	0	530.544	2118.15	4	2118.15	-0.0075	1	36.98	0.00034	R	KLQHELEEAEER	A				Cmpd 14273, AutoMSn(530.5436), 161.1 min (13229323981771038)	13A/AvB	-0.036	16A/AvB	0.042	27A/AvB	0.381	29A/AvB	-0.008	10B/AvB	0.48	21B/AvB	0.373	25B/AvB	-0.035	37B/AvB	0.182	113	21909.8	114	-1661.97	115	1917.45
1	Q9TV62	Myosin-4 OS=Sus scrofa GN=MYH4 PE=2 SV=1	30936	287893	1373	1373	114	114	118030	1	1	0	530.544	2118.15	4	2118.15	-0.0075	1	41.73	0.00012	R	KLQHELEEAEER	A				Cmpd 13847, AutoMSn(530.5436), 153.6 min (13229323981818387)	13A/AvB	0.199	16A/AvB	0.194	27A/AvB	0.197	29A/AvB	0.214	10B/AvB	0.279	21B/AvB	0.294	25B/AvB	0.167	37B/AvB	0.259	113	43403.8	114	30950.7	115	30071.6
1	Q9TV62	Myosin-4 OS=Sus scrofa GN=MYH4 PE=2 SV=1	30936	287893	1373	1373	114	114	118031	1	1	0	530.544	2118.15	4	2118.15	-0.0073	1	44.87	6.2e-05	R	KLQHELEEAEER	A				Cmpd 14129, AutoMSn(530.5437), 159.5 min (13229323981770750)	13A/AvB	-0.066	16A/AvB	1.324	27A/AvB	0.023	29A/AvB	-0.001	10B/AvB	0.528	21B/AvB	0.146	25B/AvB	-0.009	37B/AvB	0.334	113	14224.9	114	-1774.36	115	35641.6
1	Q9TV62	Myosin-4 OS=Sus scrofa GN=MYH4 PE=2 SV=1	30936	287893	1373	1373	114	114	118032	1	1	0	530.544	2118.15	4	2118.15	-0.0073	1	42.72	9.9e-05	R	KLQHELEEAEER	A				Cmpd 14343, AutoMSn(530.5437), 160.3 min (13229323981557302)	13A/AvB	0.164	16A/AvB	0.253	27A/AvB	0.182	29A/AvB	0.194	10B/AvB	0.326	21B/AvB	0.299	25B/AvB	0.142	37B/AvB	0.233	113	17839.5	114	8986.94	115	13883.1
1	Q9TV62	Myosin-4 OS=Sus scrofa GN=MYH4 PE=2 SV=1	30936	287893	1373	1373	114	114	118033	1	1	0	530.544	2118.15	4	2118.15	-0.0073	1	27.84	0.0024	R	KLQHELEEAEER	A				Cmpd 13919, AutoMSn(530.5437), 154.4 min (13229323981818531)	13A/AvB	0.178	16A/AvB	0.22	27A/AvB	0.208	29A/AvB	0.212	10B/AvB	0.32	21B/AvB	0.311	25B/AvB	0.136	37B/AvB	0.233	113	50593	114	28117.6	115	34827.3
1	Q9TV62	Myosin-4 OS=Sus scrofa GN=MYH4 PE=2 SV=1	30936	287893	1373	1373	114	114	118036	1	1	0	530.544	2118.15	4	2118.15	-0.0071	1	25.53	0.004	R	KLQHELEEAEER	A				Cmpd 14156, AutoMSn(530.5438), 160.0 min (13229323981721715)	13A/AvB	0.291	16A/AvB	0.28	27A/AvB	0.291	29A/AvB	0.194	10B/AvB	0.359	21B/AvB	0.286	25B/AvB	0.14	37B/AvB	0.215	113	6555.56	114	5303.53	115	5108.23
1	Q9TV62	Myosin-4 OS=Sus scrofa GN=MYH4 PE=2 SV=1	30936	287893	1373	1373	114	114	118037	1	1	0	530.544	2118.15	4	2118.15	-0.0071	1	23.2	0.0067	R	KLQHELEEAEER	A				Cmpd 14502, AutoMSn(530.5438), 163.7 min (13229323981771496)	13A/AvB	-0.063	16A/AvB	0.116	27A/AvB	0.356	29A/AvB	-0.008	10B/AvB	0.822	21B/AvB	0.02	25B/AvB	-0.019	37B/AvB	0.177	113	23334.6	114	-1795.56	115	3303.95
1	Q9TV62	Myosin-4 OS=Sus scrofa GN=MYH4 PE=2 SV=1	30936	287893	1373	1373	114	114	118038	1	1	0	530.544	2118.15	4	2118.15	-0.0071	1	31.89	0.001	R	KLQHELEEAEER	A				Cmpd 13261, AutoMSn(530.5438), 147.9 min (13229323981865876)	13A/AvB	0.155	16A/AvB	0.226	27A/AvB	0.156	29A/AvB	0.167	10B/AvB	0.333	21B/AvB	0.263	25B/AvB	0.144	37B/AvB	0.259	113	34316.4	114	15997.9	115	23272.9
1	Q9TV62	Myosin-4 OS=Sus scrofa GN=MYH4 PE=2 SV=1	30936	287893	1373	1373	114	114	118040	1	1	0	530.544	2118.15	4	2118.15	-0.0068	1	26.86	0.003	R	KLQHELEEAEER	A				Cmpd 14058, AutoMSn(530.5438), 158.6 min (13229323981770608)	13A/AvB	-0.061	16A/AvB	0.037	27A/AvB	0.33	29A/AvB	-0.007	10B/AvB	0.813	21B/AvB	0.084	25B/AvB	-0.02	37B/AvB	0.123	113	28554	114	-2141.44	115	1285.46
1	Q9TV62	Myosin-4 OS=Sus scrofa GN=MYH4 PE=2 SV=1	30936	287893	1373	1373	114	114	118041	1	1	0	530.544	2118.15	4	2118.15	-0.0068	1	53.44	9.7e-06	R	KLQHELEEAEER	A				Cmpd 13405, AutoMSn(530.5439), 149.5 min (13229323981866164)	13A/AvB	0.154	16A/AvB	0.196	27A/AvB	0.193	29A/AvB	0.207	10B/AvB	0.331	21B/AvB	0.317	25B/AvB	0.137	37B/AvB	0.215	113	22892.4	114	10620.8	115	13584.1
1	Q9TV62	Myosin-4 OS=Sus scrofa GN=MYH4 PE=2 SV=1	30936	287893	1373	1373	114	114	118042	1	1	0	530.544	2118.15	4	2118.15	-0.0068	1	38.27	0.00026	R	KLQHELEEAEER	A				Cmpd 13333, AutoMSn(530.5438), 148.7 min (13229323981866020)	13A/AvB	0.17	16A/AvB	0.176	27A/AvB	0.216	29A/AvB	0.188	10B/AvB	0.323	21B/AvB	0.274	25B/AvB	0.165	37B/AvB	0.238	113	26380.5	114	13872.9	115	14392.8
1	Q9TV62	Myosin-4 OS=Sus scrofa GN=MYH4 PE=2 SV=1	30936	287893	1373	1373	114	114	118047	1	1	0	530.544	2118.15	4	2118.15	-0.0066	1	30.68	0.0013	R	KLQHELEEAEER	A				Cmpd 14228, AutoMSn(530.5439), 160.8 min (13229323981721859)	13A/AvB	0.065	16A/AvB	0.209	27A/AvB	0.131	29A/AvB	0.256	10B/AvB	0.437	21B/AvB	0.246	25B/AvB	0.154	37B/AvB	0.163	113	6272.5	114	928.423	115	2999.54
1	Q9TV62	Myosin-4 OS=Sus scrofa GN=MYH4 PE=2 SV=1	30936	287893	1373	1373	114	114	118049	1	1	0	530.544	2118.15	4	2118.15	-0.0063	1	15.24	0.037	R	KLQHELEEAEER	A				Cmpd 14031, AutoMSn(530.5440), 158.3 min (13229323981770554)	13A/AvB	-0.005	16A/AvB	0.273	27A/AvB	0.556	29A/AvB	-0.011	10B/AvB	0.464	21B/AvB	0.589	25B/AvB	-0.053	37B/AvB	0	113	10137.8	114	-105.923	115	5958.12
1	Q9TV62	Myosin-4 OS=Sus scrofa GN=MYH4 PE=2 SV=1	30936	287893	1373	1373	114	114	118054	1	1	0	530.544	2118.15	4	2118.15	-0.0056	1	30.78	0.0013	R	KLQHELEEAEER	A				Cmpd 14084, AutoMSn(530.5441), 159.2 min (13229323981721571)	13A/AvB	0.14	16A/AvB	0.241	27A/AvB	0.194	29A/AvB	0.242	10B/AvB	0.267	21B/AvB	0.334	25B/AvB	0.109	37B/AvB	0.29	113	3948.06	114	2067.47	115	3576.27
1	Q9TV62	Myosin-4 OS=Sus scrofa GN=MYH4 PE=2 SV=1	30936	287893	1373	1373	114	114	118055	1	1	0	530.544	2118.15	4	2118.15	-0.0056	1	24.33	0.0052	R	KLQHELEEAEER	A				Cmpd 14356, AutoMSn(530.5441), 162.2 min (13229323981722115)	13A/AvB	0.23	16A/AvB	0.209	27A/AvB	0.219	29A/AvB	0.242	10B/AvB	0.345	21B/AvB	0.306	25B/AvB	0.131	37B/AvB	0.219	113	4008.67	114	2675.34	115	2432.77
1	Q9TV62	Myosin-4 OS=Sus scrofa GN=MYH4 PE=2 SV=1	30936	287893	1373	1373	114	114	118056	1	1	0	530.544	2118.15	4	2118.15	-0.0053	1	29.28	0.0018	R	KLQHELEEAEER	A				Cmpd 14127, AutoMSn(530.5442), 157.8 min (13229323981556870)	13A/AvB	0.17	16A/AvB	0.21	27A/AvB	0.187	29A/AvB	0.178	10B/AvB	0.334	21B/AvB	0.306	25B/AvB	0.155	37B/AvB	0.206	113	22293	114	11333.2	115	14047.9
1	Q9TV62	Myosin-4 OS=Sus scrofa GN=MYH4 PE=2 SV=1	30936	287893	1373	1373	114	114	118057	1	1	0	530.544	2118.15	4	2118.15	-0.0051	1	37.05	0.00034	R	KLQHELEEAEER	A				Cmpd 14056, AutoMSn(530.5442), 157.0 min (13229323981556728)	13A/AvB	0.169	16A/AvB	0.211	27A/AvB	0.228	29A/AvB	0.179	10B/AvB	0.323	21B/AvB	0.32	25B/AvB	0.133	37B/AvB	0.224	113	15456.1	114	8080.63	115	10111.4
1	Q9TV62	Myosin-4 OS=Sus scrofa GN=MYH4 PE=2 SV=1	30936	287893	1373	1373	114	114	118058	1	1	0	530.544	2118.15	4	2118.15	-0.0051	1	37.31	0.00032	R	KLQHELEEAEER	A				Cmpd 14199, AutoMSn(530.5443), 158.7 min (13229323981557014)	13A/AvB	0.174	16A/AvB	0.212	27A/AvB	0.204	29A/AvB	0.177	10B/AvB	0.291	21B/AvB	0.328	25B/AvB	0.133	37B/AvB	0.248	113	20397.9	114	12177.2	115	14883.1
1	Q9TV62	Myosin-4 OS=Sus scrofa GN=MYH4 PE=2 SV=1	30936	287893	1373	1373	114	114	118059	1	1	0	530.544	2118.15	4	2118.15	-0.0051	1	33.07	0.00079	R	KLQHELEEAEER	A				Cmpd 13191, AutoMSn(530.5442), 147.1 min (13229323981865736)	13A/AvB	0.208	16A/AvB	0.14	27A/AvB	0.203	29A/AvB	0.21	10B/AvB	0.348	21B/AvB	0.274	25B/AvB	0.159	37B/AvB	0.219	113	40735.8	114	24328.9	115	16354.6
1	Q9TV62	Myosin-4 OS=Sus scrofa GN=MYH4 PE=2 SV=1	30936	287893	1373	1373	114	114	118137	1	1	0	709.061	2124.16	3	2124.17	-0.0112	0	15.41	0.036	K	IEDEQALAMQLQK	K				Cmpd 14317, AutoMSn(709.0605), 161.6 min (13229323981771126)	13A/AvB	-0.074	16A/AvB	0.584	27A/AvB	0.633	29A/AvB	-0.013	10B/AvB	0.838	21B/AvB	-0.039	25B/AvB	0.201	37B/AvB	0	113	5464.12	114	-481.701	115	3803.42
1	Q9TV62	Myosin-4 OS=Sus scrofa GN=MYH4 PE=2 SV=1	30936	287893	1373	1373	114	114	118138	1	1	0	709.061	2124.16	3	2124.17	-0.0102	0	42.75	0.00018	K	IEDEQALAMQLQK	K				Cmpd 14083, AutoMSn(709.0608), 157.2 min (13229323981867520)	13A/AvB	0.265	16A/AvB	0.257	27A/AvB	0.166	29A/AvB	0.261	10B/AvB	0.366	21B/AvB	0.213	25B/AvB	0.234	37B/AvB	0.187	113	6742.85	114	4884.53	115	4723.55
1	Q9TV62	Myosin-4 OS=Sus scrofa GN=MYH4 PE=2 SV=1	30936	287893	1373	1373	114	114	118139	1	1	0	709.061	2124.16	3	2124.17	-0.0102	0	28.81	0.002	K	IEDEQALAMQLQK	K				Cmpd 14086, AutoMSn(709.0609), 156.3 min (13229323981818865)	13A/AvB	0.112	16A/AvB	0.181	27A/AvB	0.143	29A/AvB	0.137	10B/AvB	0.618	21B/AvB	0.169	25B/AvB	0.118	37B/AvB	0.096	113	16949.7	114	3063.1	115	4972.17
1	Q9TV62	Myosin-4 OS=Sus scrofa GN=MYH4 PE=2 SV=1	30936	287893	1373	1373	114	114	118140	1	1	0	709.062	2124.16	3	2124.17	-0.0082	0	52.48	5.8e-05	K	IEDEQALAMQLQK	K				Cmpd 14162, AutoMSn(709.0615), 160.0 min (13229323981721727)	13A/AvB	0.174	16A/AvB	0.149	27A/AvB	0.164	29A/AvB	0.182	10B/AvB	0.184	21B/AvB	0.23	25B/AvB	0.189	37B/AvB	0.396	113	2192.87	114	2072.65	115	1773.97
1	Q9TV62	Myosin-4 OS=Sus scrofa GN=MYH4 PE=2 SV=1	30936	287893	1373	1373	114	114	118141	1	1	0	709.062	2124.16	3	2124.17	-0.0082	0	75	1e-07	K	IEDEQALAMQLQK	K				Cmpd 14243, AutoMSn(709.0615), 160.8 min (13229323981770978)	13A/AvB	-0.029	16A/AvB	0.013	27A/AvB	-0.019	29A/AvB	0.169	10B/AvB	0.391	21B/AvB	0.155	25B/AvB	0.282	37B/AvB	0.172	113	12758.7	114	-953.922	115	429.558
1	Q9TV62	Myosin-4 OS=Sus scrofa GN=MYH4 PE=2 SV=1	30936	287893	1373	1373	114	114	118142	1	1	0	709.062	2124.16	3	2124.17	-0.0082	0	66.12	2.5e-06	K	IEDEQALAMQLQK	K				Cmpd 14356, AutoMSn(709.0615), 160.4 min (13229323981557328)	13A/AvB	0.184	16A/AvB	0.169	27A/AvB	0.221	29A/AvB	0.271	10B/AvB	0.347	21B/AvB	0.3	25B/AvB	0.223	37B/AvB	0.13	113	7122.3	114	3778.74	115	3459.64
1	Q9TV62	Myosin-4 OS=Sus scrofa GN=MYH4 PE=2 SV=1	30936	287893	1373	1373	114	114	118143	1	1	0	709.062	2124.16	3	2124.17	-0.0079	0	44.48	7e-05	K	IEDEQALAMQLQK	K				Cmpd 14285, AutoMSn(709.0617), 158.5 min (13229323981819263)	13A/AvB	0.228	16A/AvB	0.265	27A/AvB	0.182	29A/AvB	0.203	10B/AvB	0.318	21B/AvB	0.244	25B/AvB	0.177	37B/AvB	0.261	113	9345.32	114	6702.62	115	7801.52
1	Q9TV62	Myosin-4 OS=Sus scrofa GN=MYH4 PE=2 SV=1	30936	287893	1373	1373	114	114	118144	1	1	0	709.062	2124.16	3	2124.17	-0.0077	0	37.5	0.0003	K	IEDEQALAMQLQK	K				Cmpd 14253, AutoMSn(709.0617), 159.1 min (13229323981867860)	13A/AvB	0.187	16A/AvB	0.248	27A/AvB	0.294	29A/AvB	0.17	10B/AvB	0.368	21B/AvB	0.237	25B/AvB	0.18	37B/AvB	0.215	113	5124.9	114	2606.51	115	3448.72
1	Q9TV62	Myosin-4 OS=Sus scrofa GN=MYH4 PE=2 SV=1	30936	287893	1373	1373	114	114	118145	1	1	0	709.062	2124.16	3	2124.17	-0.0075	0	44.2	0.00039	K	IEDEQALAMQLQK	K				Cmpd 14090, AutoMSn(709.0618), 159.2 min (13229323981721583)	13A/AvB	0.192	16A/AvB	0.219	27A/AvB	0.205	29A/AvB	0.185	10B/AvB	0.442	21B/AvB	0.3	25B/AvB	0.105	37B/AvB	0.153	113	3093.97	114	1344.05	115	1535.1
1	Q9TV62	Myosin-4 OS=Sus scrofa GN=MYH4 PE=2 SV=1	30936	287893	1373	1373	114	114	118146	1	1	0	709.062	2124.16	3	2124.17	-0.0073	0	17.59	0.022	K	IEDEQALAMQLQK	K				Cmpd 14432, AutoMSn(709.0618), 161.3 min (13229323981557480)	13A/AvB	0.231	16A/AvB	0.252	27A/AvB	0.186	29A/AvB	0.192	10B/AvB	0.322	21B/AvB	0.252	25B/AvB	0.189	37B/AvB	0.238	113	8582.04	114	6155.01	115	6730.87
1	Q9TV62	Myosin-4 OS=Sus scrofa GN=MYH4 PE=2 SV=1	30936	287893	1373	1373	114	114	118147	1	1	0	709.062	2124.16	3	2124.17	-0.0073	0	51.67	3e-05	K	IEDEQALAMQLQK	K				Cmpd 14427, AutoMSn(709.0618), 161.2 min (13229323981557470)	13A/AvB	0.18	16A/AvB	0.291	27A/AvB	0.209	29A/AvB	0.22	10B/AvB	0.358	21B/AvB	0.214	25B/AvB	0.205	37B/AvB	0.223	113	14420	114	7250.15	115	11692.8
1	Q9TV62	Myosin-4 OS=Sus scrofa GN=MYH4 PE=2 SV=1	30936	287893	1373	1373	114	114	118148	1	1	0	709.062	2124.16	3	2124.17	-0.0073	0	56.54	5e-06	K	IEDEQALAMQLQK	K				Cmpd 14316, AutoMSn(709.0618), 158.9 min (13229323981819325)	13A/AvB	0.193	16A/AvB	0.226	27A/AvB	0.193	29A/AvB	0.222	10B/AvB	0.293	21B/AvB	0.243	25B/AvB	0.189	37B/AvB	0.275	113	30751.7	114	20306.8	115	23715.9
1	Q9TV62	Myosin-4 OS=Sus scrofa GN=MYH4 PE=2 SV=1	30936	287893	1373	1373	114	114	118149	1	1	0	709.062	2124.16	3	2124.17	-0.0073	0	57.88	1.3e-05	K	IEDEQALAMQLQK	K				Cmpd 14315, AutoMSn(709.0618), 158.9 min (13229323981819323)	13A/AvB	0.189	16A/AvB	0.213	27A/AvB	0.204	29A/AvB	0.224	10B/AvB	0.277	21B/AvB	0.255	25B/AvB	0.212	37B/AvB	0.255	113	22831.6	114	15566.4	115	17560.9
1	Q9TV62	Myosin-4 OS=Sus scrofa GN=MYH4 PE=2 SV=1	30936	287893	1373	1373	114	114	118150	1	1	0	709.062	2124.16	3	2124.17	-0.0071	0	63.07	3.9e-06	K	IEDEQALAMQLQK	K				Cmpd 14387, AutoMSn(709.0619), 159.7 min (13229323981819467)	13A/AvB	0.171	16A/AvB	0.222	27A/AvB	0.154	29A/AvB	0.207	10B/AvB	0.314	21B/AvB	0.241	25B/AvB	0.183	37B/AvB	0.262	113	21706.6	114	11812.7	115	15348.9
1	Q9TV62	Myosin-4 OS=Sus scrofa GN=MYH4 PE=2 SV=1	30936	287893	1373	1373	114	114	118151	1	1	0	709.062	2124.16	3	2124.17	-0.0068	0	29.43	0.0017	K	IEDEQALAMQLQK	K				Cmpd 14460, AutoMSn(709.0620), 160.5 min (13229323981819613)	13A/AvB	0.24	16A/AvB	0.339	27A/AvB	0.255	29A/AvB	0.274	10B/AvB	0.3	21B/AvB	0.282	25B/AvB	0.25	37B/AvB	0.168	113	5105.58	114	4090.03	115	5771.34
1	Q9TV62	Myosin-4 OS=Sus scrofa GN=MYH4 PE=2 SV=1	30936	287893	1373	1373	114	114	118152	1	1	0	709.062	2124.16	3	2124.17	-0.0062	0	24.03	0.0056	K	IEDEQALAMQLQK	K				Cmpd 14501, AutoMSn(709.0622), 162.1 min (13229323981557618)	13A/AvB	0.174	16A/AvB	0.396	27A/AvB	0.136	29A/AvB	0.106	10B/AvB	0.352	21B/AvB	0.102	25B/AvB	0.194	37B/AvB	0.352	113	4079.91	114	2020.04	115	4588.19
1	Q9TV62	Myosin-4 OS=Sus scrofa GN=MYH4 PE=2 SV=1	30936	287893	1373	1373	114	114	118153	1	1	0	709.062	2124.16	3	2124.17	-0.0062	0	32.02	0.00099	K	IEDEQALAMQLQK	K				Cmpd 14313, AutoMSn(709.0622), 158.8 min (13229323981819319)	13A/AvB	0.252	16A/AvB	0.263	27A/AvB	0.275	29A/AvB	0.246	10B/AvB	0.27	21B/AvB	0.28	25B/AvB	0.154	37B/AvB	0.296	113	15744.7	114	14674.3	115	15326.5
1	Q9TV62	Myosin-4 OS=Sus scrofa GN=MYH4 PE=2 SV=1	30936	287893	1373	1373	114	114	118154	1	1	0	709.062	2124.16	3	2124.17	-0.006	0	58.2	1.2e-05	K	IEDEQALAMQLQK	K				Cmpd 14179, AutoMSn(709.0623), 158.3 min (13229323981867712)	13A/AvB	0.196	16A/AvB	0.215	27A/AvB	0.173	29A/AvB	0.22	10B/AvB	0.356	21B/AvB	0.205	25B/AvB	0.16	37B/AvB	0.28	113	12378.4	114	6832.42	115	7498.79
[truncated: 5,634 more rows]
[truncated: 10 more columns]

## Sheet: Tabulated data
prot_hit_num	prot_acc	prot_desc	-	Acc-Name	prot_score	prot_mass	prot_matches_sig	prot_sequences_sig	pep_query	pep_rank	pep_isbold	pep_isunique	pep_exp_mz	pep_exp_mr	pep_exp_z	pep_calc_mr	pep_delta	pep_miss	pep_score	pep_expect	pep_res_before	pep_seq	pep_res_after	pep_var_mod	pep_var_mod_pos	pep_summed_mod_pos	pep_scan_title	10B	13A	16A	21B	25B	27A	29A	37B	10B Sum Norm	13A Sum Norm	16A Sum Norm	21B Sum Norm	25B Sum Norm	27A Sum Norm	29A Sum Norm	37B Sum Norm	Peptide Sum	10B %	13A %	16A %	21B %	25B %
[truncated: 6,616 more rows]
[truncated: 3 more columns]

[truncated: 3 more sheets: Pivot 1, Pivot Out, Results]
