# Supplementary material for: Increased intramuscular fat induced by reduced dietary protein in finishing pigs: effects on the longissimus lumborum muscle proteome
Source: Royal Society of Chemistry journal article supplement (doi:10.1039/c6mb00213g), 2016-06-01
Supplement: c6mb00213g4.xlsx [file c6mb00213g4.xlsx]

## Sheet: Peak area summary
Accession	Peptide count	Unique peptides	Confidence score	Anova (p)	Max fold change	Highest mean condition
F1SLN0	1	1	35.15	0.0087964	2.09898	B
F1S9Q1	1	1	14.19	0.0236529	2.04313	A
P68137;B6VNT8;F1SLG5;I3LVD5	23	23	1218.58	0.0244682	1.38079	B
I3LDN4	1	1	15.63	0.0273144	1.60449	A
Q9TV62;F1S4X7;I3L675;O46422	141	141	8091.9	0.0289809	1.28183	B
F1S0X9	1	1	31.81	0.0290549	1.90273	B
A1XQT6;F1SNW4	7	7	282.72	0.0318732	1.78564	A
F1SMN5	12	12	405.69	0.0351704	1.70741	B
F1RUN2;K7GNM1	8	8	352.01	0.0389534	2.27602	A
F2Z5B6;A1XQV4;F1SG00	3	3	108.55	0.0398067	2.52342	A
F1RGS3	1	1	14.02	0.0404367	1.32628	B
D0G7F6;Q29371	6	6	354.85	0.0409299	2.3217	A
F1SHL9;I3LAK4	24	24	1008.27	0.0426153	2.19722	A
F1RFY2;I3LCN1;I3LK59	15	15	875.52	0.0452125	2.32921	A
P00355;F1RM74;F1SLR8	17	17	1137.05	0.0548205	1.59921	A
F1SEN8	1	1	80.67	0.0563128	2.29244	B
F1RIB2	1	1	23.31	0.0566532	1.47984	B
F1SSA6	1	1	14.2	0.0865682	3.20294	A
F1SRS2	5	5	177.89	0.0908936	1.53084	A
F1RNU9	4	4	78.88	0.105562	1.85262	A
I3L7X1	1	1	15.71	0.106205	6.27622	A
Q2HYU2;I3LCA1;I3LFQ5	6	6	286.96	0.108988	2.01218	A
F1S814	12	12	516.11	0.12106	1.50127	A
F1RH20;F1RH19	16	16	753.23	0.122942	1.2957	A
F1SM75	4	4	169.24	0.132242	1.48091	B
F1SHX0	1	1	26.3	0.137181	1.52547	B
F1RPH0;F1RPH1;K7GMF2;K7GNI9;Q6RI85	8	8	389.07	0.140413	2.71043	A
B5KJG2;F1S8Y5	6	6	236.9	0.143258	1.68785	A
F1RPS8	2	2	47.52	0.145373	1.76853	B
F1S3A9	1	1	15.13	0.175157	2.94556	A
I3LIE7	1	1	36.53	0.179512	1.36466	A
Q5XLD3;I3LBJ8	15	15	824.17	0.180901	1.90835	A
Q5XLD2	8	8	226.84	0.213803	1.88729	A
F1RHL9	9	9	323.47	0.237942	1.27963	A
F1RK45	1	1	20.24	0.250741	2.01889	A
F1RVR2	1	1	17.73	0.251937	2.20243	B
P00339;F1SFX0;F1SR05;I3LHN1	8	8	316.38	0.279741	1.12572	A
F1SLA0;K7GLT8	3	3	107.56	0.279917	2.49115	A
F1SC36	1	1	20.3	0.286789	1.35508	B
F1SK78	1	1	17.76	0.288631	1.56567	A
F1RK48	2	2	120.99	0.294271	1.32781	A
F1SGG3	1	1	21.9	0.30428	2.51347	A
F1RQQ8;F1SFF8	12	12	408.85	0.304598	1.20966	A
F1RFH9;I3LKC9;P11607	20	20	646.63	0.355222	1.22797	B
F2Z571	1	1	19.6	0.376508	1.6995	A
F1RVL5	6	6	135.79	0.382315	1.31367	A
F1SHA2	1	1	47.57	0.397922	1.14177	A
Q0PY11	1	1	49.07	0.440155	1.1997	B
F2Z5U0	1	1	15.08	0.446059	1.44216	A
I3LPA4	1	1	33.54	0.456894	1.27745	A
F1RJ25;F1SSB5	6	6	387.38	0.459675	1.24681	A
F1SHW9	4	4	96.27	0.467256	1.37535	B
F1RNH2	1	1	15.73	0.498556	1.63619	B
F1SAY2	1	1	14.15	0.563484	1.07365	A
P49812	1	1	14.07	0.635877	1.1642	A
Q2HYU1	1	1	51.62	0.660617	2.14754	A
F1S557	4	4	92.18	0.684018	1.05644	A
P02540	2	2	48.96	0.688072	1.13811	B
Q5S1S4	5	5	272.92	0.691795	1.05266	A
F1SRI8	1	1	19.05	0.698833	4.4061	A
F1RU49;F1RI39	17	17	866.52	0.759513	1.02694	A
I3LM21	2	2	73.2	0.779586	1.09507	A
F1RRJ1	1	1	29.89	0.837744	1.05175	B
F1SRC5	1	1	40.48	0.878921	1.03463	A
F1SR85	1	1	34.87	0.881878	1.03008	B
F1SGI7	1	1	26.15	0.88469	2.47621	A
F1SA70;A5A8V7;F1RS36	4	4	99.02	0.973094	1.06186	B

## Sheet: Peak area results
									Normalized abundance						Raw abundance						Spectral counts
									A			B			A			B			A			B			Tags
Accession	Peptide count	Unique peptides	Confidence score	Anova (p)	Max fold change	Highest mean condition	Lowest mean condition	Description	B853_13A_DDA_LabelFree_ii_1-E,1_01_672	B853_16A_DDA_LabelFree_1-E,2_01_673	B853_27A_DDA_LabelFree_1-E,3_01_674	B853_10B_DDA_LabelFree_1-E,5_01_677	B853_21B_DDA_LabelFree_1-E,6_01_678	B853_37B_DDA_LabelFree_ii_1-E,8_01_683	B853_13A_DDA_LabelFree_ii_1-E,1_01_672	B853_16A_DDA_LabelFree_1-E,2_01_673	B853_27A_DDA_LabelFree_1-E,3_01_674	B853_10B_DDA_LabelFree_1-E,5_01_677	B853_21B_DDA_LabelFree_1-E,6_01_678	B853_37B_DDA_LabelFree_ii_1-E,8_01_683	B853_13A_DDA_LabelFree_ii_1-E,1_01_672	B853_16A_DDA_LabelFree_1-E,2_01_673	B853_27A_DDA_LabelFree_1-E,3_01_674	B853_10B_DDA_LabelFree_1-E,5_01_677	B853_21B_DDA_LabelFree_1-E,6_01_678	B853_37B_DDA_LabelFree_ii_1-E,8_01_683	>1 Peptide	Anova p-value <= 0.05	Max fold change >= 2
F1SLN0	1	1	35.15	0.0087964	2.09898	B	A	Uncharacterized protein OS=Sus scrofa GN=DHX29 PE=4 SV=2	97484.6	81049.4	73420.2	138254	174660	215932	75671.3	113396	87484.8	136752	174660	118470	1	0	0	0	0	0
F1S9Q1	1	1	14.19	0.0236529	2.04313	A	B	Uncharacterized protein OS=Sus scrofa PE=3 SV=2	1756.67	1175.04	1640.19	868.793	527.386	841.516	1363.6	1643.99	1954.39	859.357	527.386	461.694	0	0	0	1	0	0
P68137;B6VNT8;F1SLG5;I3LVD5	23	23	1218.58	0.0244682	1.38079	B	A	Actin, alpha skeletal muscle OS=Sus scrofa GN=ACTA1 PE=3 SV=1	2.38424e+06	1.83144e+06	1.97872e+06	3.11397e+06	2.62346e+06	2.81572e+06	1.85074e+06	2.56236e+06	2.35777e+06	3.08014e+06	2.62346e+06	1.54483e+06	54	62	59	68	63	59	x	x
I3LDN4	1	1	15.63	0.0273144	1.60449	A	B	Uncharacterized protein OS=Sus scrofa GN=DMXL1 PE=4 SV=1	13046.1	14704.7	17490.5	11602.4	8168.74	8425.54	10126.9	20573.2	20841.1	11476.4	8168.74	4622.64	0	0	0	0	0	1
Q9TV62;F1S4X7;I3L675;O46422	141	141	8091.9	0.0289809	1.28183	B	A	Myosin-4 OS=Sus scrofa GN=MYH4 PE=2 SV=1	6.30025e+06	4.95262e+06	5.51234e+06	6.77132e+06	7.22611e+06	7.49264e+06	4.8905e+06	6.92918e+06	6.5683e+06	6.69777e+06	7.22611e+06	4.11081e+06	217	315	321	317	337	223	x	x
F1S0X9	1	1	31.81	0.0290549	1.90273	B	A	Uncharacterized protein OS=Sus scrofa GN=ASS1 PE=3 SV=1	27915.1	23204.4	20019.8	32895.6	44936.1	57527	21668.8	32465.2	23854.9	32538.3	44936.1	31562	0	0	0	1	0	0
A1XQT6;F1SNW4	7	7	282.72	0.0318732	1.78564	A	B	MLC1f OS=Sus scrofa GN=MYL1 PE=2 SV=1	83829.8	103060	87108.9	69344.6	46034.2	38067.1	65071.9	144191	103796	68591.5	46034.2	20885.3	8	14	9	8	6	3	x	x
F1SMN5	12	12	405.69	0.0351704	1.70741	B	A	Uncharacterized protein OS=Sus scrofa GN=FLNC PE=4 SV=1	14691.7	15362.5	12649.8	28322.6	27106.5	17484.3	11404.2	21493.6	15073.1	28015	27106.5	9592.66	2	6	2	10	13	5	x	x
F1RUN2;K7GNM1	8	8	352.01	0.0389534	2.27602	A	B	Serum albumin OS=Sus scrofa GN=ALB PE=4 SV=1	23855.3	50243.3	50939.8	19744.6	17559.5	17633.1	18517.4	70295.2	60698	19530.1	17559.5	9674.35	2	11	7	6	5	1	x	x	x
F2Z5B6;A1XQV4;F1SG00	3	3	108.55	0.0398067	2.52342	A	B	Tropomyosin alpha-1 chain OS=Sus scrofa GN=TPM1 PE=3 SV=1	3755.81	6093.01	7480.85	3452.46	1573.83	1841.25	2915.4	8524.7	8913.92	3414.96	1573.83	1010.19	0	3	0	1	0	0	x	x	x
F1RGS3	1	1	14.02	0.0404367	1.32628	B	A	Uncharacterized protein OS=Sus scrofa GN=C17orf85 PE=4 SV=2	7152.49	6115.28	5967.03	7284.33	9133.47	9092.94	5552.04	8555.87	7110.1	7205.22	9133.47	4988.8	0	1	0	0	0	0
D0G7F6;Q29371	6	6	354.85	0.0409299	2.3217	A	B	Triosephosphate isomerase OS=Sus scrofa GN=TPI1 PE=2 SV=1	50787.8	80427.6	68573.3	32323.2	37837.2	15892.2	39423.5	112526	81709.5	31972.2	37837.2	8719.19	3	7	7	3	7	1	x	x	x
F1SHL9;I3LAK4	24	24	1008.27	0.0426153	2.19722	A	B	Pyruvate kinase (Fragment) OS=Sus scrofa GN=PKM PE=3 SV=2	383441	654835	880113	308901	257545	306650	297641	916177	1.04871e+06	305546	257545	168242	19	46	56	22	13	14	x	x	x
F1RFY2;I3LCN1;I3LK59	15	15	875.52	0.0452125	2.32921	A	B	Beta-enolase OS=Sus scrofa GN=ENO3 PE=3 SV=1	250909	442513	607088	221281	175964	161104	194765	619117	723384	218877	175964	88388.8	13	43	48	22	17	8	x	x	x
P00355;F1RM74;F1SLR8	17	17	1137.05	0.0548205	1.59921	A	B	Glyceraldehyde-3-phosphate dehydrogenase OS=Sus scrofa GN=GAPDH PE=1 SV=4	743533	1.05161e+06	1.13711e+06	752686	567295	513591	577159	1.47131e+06	1.35494e+06	744511	567295	281779	29	62	52	44	38	22	x
F1SEN8	1	1	80.67	0.0563128	2.29244	B	A	Uncharacterized protein OS=Sus scrofa GN=LDB3 PE=4 SV=2	3389.09	1705.23	2299.55	8300.01	3769.71	4880.28	2630.74	2385.77	2740.06	8209.86	3769.71	2677.54	2	0	1	2	1	1
F1RIB2	1	1	23.31	0.0566532	1.47984	B	A	Uncharacterized protein OS=Sus scrofa GN=BTBD1 PE=4 SV=2	3608.85	2300.25	3008.41	3923.21	4201.65	5071.59	2801.33	3218.27	3584.71	3880.6	4201.65	2782.51	1	1	1	1	0	1
F1SSA6	1	1	14.2	0.0865682	3.20294	A	B	Uncharacterized protein (Fragment) OS=Sus scrofa GN=MYH10 PE=4 SV=2	1514.82	3964.63	3778.81	328.282	1202.26	1360.01	1175.86	5546.89	4502.69	324.716	1202.26	746.165	0	1	0	0	0	0
F1SRS2	5	5	177.89	0.0908936	1.53084	A	B	Uncharacterized protein OS=Sus scrofa GN=LOC100302368 PE=3 SV=1	64185.1	106386	93941.8	69266.6	47376.7	56146	49823	148844	111938	68514.3	47376.7	30804.2	1	11	5	4	4	3	x
F1RNU9	4	4	78.88	0.105562	1.85262	A	B	Glucose-6-phosphate isomerase OS=Sus scrofa GN=GPI PE=3 SV=2	9307.23	15427.2	19245.6	11219.1	6816.22	5704.12	7224.63	21584.1	22932.3	11097.2	6816.22	3129.54	1	1	2	0	0	0	x
I3L7X1	1	1	15.71	0.106205	6.27622	A	B	Uncharacterized protein OS=Sus scrofa GN=RAG-1 PE=4 SV=1	166584	226186	284211	46383.4	60411.8	1069.26	129309	316456	338655	45879.6	60411.8	586.647	1	0	0	0	1	0
Q2HYU2;I3LCA1;I3LFQ5	6	6	286.96	0.108988	2.01218	A	B	ATP-dependent 6-phosphofructokinase, muscle type OS=Sus scrofa GN=PFKM PE=2 SV=1	17364.4	33936.1	43979.2	20257.7	11827.3	15266.5	13478.9	47479.8	52404	20037.6	11827.3	8375.92	3	7	6	6	3	2	x		x
F1S814	12	12	516.11	0.12106	1.50127	A	B	Uncharacterized protein OS=Sus scrofa GN=PGM1 PE=3 SV=2	51462.5	84822.9	85881.4	60072.6	42518.9	45394.3	39947.2	118675	102333	59420.2	42518.9	24905.4	6	15	12	12	7	9	x
F1RH20;F1RH19	16	16	753.23	0.122942	1.2957	A	B	Uncharacterized protein OS=Sus scrofa GN=MYBPC2 PE=4 SV=2	93437.4	95568.8	129464	89724.9	85987.6	70077.3	72529.7	133710	154264	88750.4	85987.6	38447.6	7	15	22	15	15	9	x
F1SM75	4	4	169.24	0.132242	1.48091	B	A	Uncharacterized protein OS=Sus scrofa GN=MYOM1 PE=4 SV=2	3847.85	4275.86	4560.23	8618.92	4641.62	5523.16	2986.85	5982.33	5433.8	8525.31	4641.62	3030.26	4	4	3	2	2	1	x
F1SHX0	1	1	26.3	0.137181	1.52547	B	A	Uncharacterized protein (Fragment) OS=Sus scrofa GN=NEB PE=4 SV=2	2489.02	2950.18	2434.34	5543.91	3671.31	2795.64	1932.07	4127.58	2900.67	5483.69	3671.31	1533.82	0	1	1	1	1	0
F1RPH0;F1RPH1;K7GMF2;K7GNI9;Q6RI85	8	8	389.07	0.140413	2.71043	A	B	Phosphoglycerate kinase (Fragment) OS=Sus scrofa GN=PGK1 PE=3 SV=2	25067.7	51240.1	59140.4	27515.5	18742.1	3715.37	19458.5	71689.8	70469.5	27216.7	18742.1	2038.42	5	10	8	5	3	1	x		x
B5KJG2;F1S8Y5	6	6	236.9	0.143258	1.68785	A	B	Phosphoglycerate mutase 2 OS=Sus scrofa GN=PGAM2 PE=2 SV=1	48061.4	91444.8	56852.7	40859	51100.1	24377.7	37307.1	127940	67743.6	40415.2	51100.1	13374.7	3	7	6	4	5	2	x
F1RPS8	2	2	47.52	0.145373	1.76853	B	A	ATP synthase subunit alpha (Fragment) OS=Sus scrofa GN=ATP5A1 PE=3 SV=1	1572.9	1700.54	1386.67	3231.4	1487.78	3522.4	1220.95	2379.22	1652.31	3196.3	1487.78	1932.55	0	1	1	2	1	1	x
F1S3A9	1	1	15.13	0.175157	2.94556	A	B	Uncharacterized protein OS=Sus scrofa GN=PMFBP1 PE=4 SV=2	3273.2	753.719	2909.52	279.197	945.116	1130.57	2540.79	1054.52	3466.88	276.165	945.116	620.28	1	0	0	0	0	0
I3LIE7	1	1	36.53	0.179512	1.36466	A	B	Uncharacterized protein OS=Sus scrofa GN=MYBPH PE=4 SV=1	3503.77	2286.6	3233.44	2285.03	1651.17	2676.28	2719.76	3199.17	3852.85	2260.22	1651.17	1468.33	0	2	1	1	1	1
Q5XLD3;I3LBJ8	15	15	824.17	0.180901	1.90835	A	B	Creatine kinase M-type OS=Sus scrofa GN=CKM PE=2 SV=1	137312	247389	368948	206586	108317	80020	106587	346120	439625	204342	108317	43902.6	7	24	37	18	12	5	x
Q5XLD2	8	8	226.84	0.213803	1.88729	A	B	Myosin regulatory light chain 2 OS=Sus scrofa GN=HUMMLC2B PE=2 SV=1	39652.2	64213.9	33137.4	50021.6	16354.5	6216.58	30779.5	89841.3	39485.3	49478.3	16354.5	3410.7	5	7	4	4	1	0	x
F1RHL9	9	9	323.47	0.237942	1.27963	A	B	Uncharacterized protein OS=Sus scrofa GN=ACTN2 PE=4 SV=1	24598	31778.9	34958.3	31338.9	21501.4	18536.2	19094	44461.7	41655.1	30998.5	21501.4	10169.8	2	8	5	8	3	2	x
F1RK45	1	1	20.24	0.250741	2.01889	A	B	Uncharacterized protein OS=Sus scrofa GN=TRAP1 PE=3 SV=2	229.815	895.214	849.173	931.162	0	46.7025	178.391	1252.49	1011.84	921.048	0	25.6231	0	1	0	0	0	0
F1RVR2	1	1	17.73	0.251937	2.20243	B	A	Uncharacterized protein OS=Sus scrofa GN=DNAH8 PE=4 SV=1	4241.35	26039.2	27547.5	19441.1	40566.7	67354.6	3292.3	36431.3	32824.6	19229.9	40566.7	36953.8	0	0	1	0	0	0
P00339;F1SFX0;F1SR05;I3LHN1	8	8	316.38	0.279741	1.12572	A	B	L-lactate dehydrogenase A chain OS=Sus scrofa GN=LDHA PE=1 SV=3	112090	124106	127180	128437	97755.4	96601.3	87008.2	173637	151543	127042	97755.4	52999.9	5	13	10	10	11	8	x
F1SLA0;K7GLT8	3	3	107.56	0.279917	2.49115	A	B	ATP synthase subunit beta OS=Sus scrofa GN=ATP5B PE=3 SV=1	3580.9	8671.82	9829.1	5319.57	3509.64	34.9058	2779.63	12132.7	11712	5261.79	3509.64	19.1509	0	2	3	1	0	0	x		x
F1SC36	1	1	20.3	0.286789	1.35508	B	A	Uncharacterized protein (Fragment) OS=Sus scrofa GN=ZNF334 PE=4 SV=2	4176.88	6860.34	2875.77	7769.14	4896.2	6187.93	3242.25	9598.28	3426.67	7684.75	4896.2	3394.98	1	0	0	0	0	0
F1SK78	1	1	17.76	0.288631	1.56567	A	B	Uncharacterized protein (Fragment) OS=Sus scrofa GN=CCDC77 PE=4 SV=2	12858.5	25748.4	31527.5	22474.4	11744	10576.9	9981.27	36024.5	37567.1	22230.3	11744	5802.97	0	0	0	1	0	0
F1RK48	2	2	120.99	0.294271	1.32781	A	B	Uncharacterized protein (Fragment) OS=Sus scrofa GN=SRL PE=4 SV=2	6111.04	6573.81	8524.27	8519.48	3650.38	3803.21	4743.62	9197.39	10157.2	8426.95	3650.38	2086.62	2	2	3	3	0	1	x
F1SGG3	1	1	21.9	0.30428	2.51347	A	B	Uncharacterized protein OS=Sus scrofa GN=KRT1 PE=3 SV=1	3078.05	1607.17	1463.22	998.69	1447.51	0	2389.3	2248.58	1743.52	987.843	1447.51	0	0	1	0	0	0	0
F1RQQ8;F1SFF8	12	12	408.85	0.304598	1.20966	A	B	Alpha-1,4 glucan phosphorylase OS=Sus scrofa GN=PYGM PE=3 SV=2	68824.1	59306.9	94883.7	63870.6	55600.1	64890.1	53423.9	82976	113060	63176.9	55600.1	35601.7	3	9	11	10	6	4	x
F1RFH9;I3LKC9;P11607	20	20	646.63	0.355222	1.22797	B	A	Calcium-transporting ATPase OS=Sus scrofa GN=ATP2A1 PE=3 SV=1	156457	76303.6	105654	166298	124435	124830	121448	106756	125894	164491	124435	68487.7	11	10	10	16	17	10	x
F2Z571	1	1	19.6	0.376508	1.6995	A	B	Uncharacterized protein OS=Sus scrofa GN=TUBB4B PE=3 SV=1	241.406	644.734	1100.74	824.415	344.68	0	187.388	902.045	1311.6	815.461	344.68	0	0	1	0	0	0	0
F1RVL5	6	6	135.79	0.382315	1.31367	A	B	Uncharacterized protein (Fragment) OS=Sus scrofa GN=MYOM2 PE=4 SV=2	7191.35	6303.96	10803.7	10440.4	4540.99	3515.72	5582.21	8819.84	12873.3	10327	4540.99	1928.88	2	1	3	4	1	0	x
F1SHA2	1	1	47.57	0.397922	1.14177	A	B	Glycerol-3-phosphate dehydrogenase [NAD(+)] (Fragment) OS=Sus scrofa GN=GPD1 PE=3 SV=2	2920.09	2756.18	2666.01	3272.82	2170.83	1862.8	2266.69	3856.15	3176.72	3237.27	2170.83	1022.02	0	1	1	1	0	0
Q0PY11	1	1	49.07	0.440155	1.1997	B	A	Elongation factor 1-alpha OS=Sus scrofa GN=EEF1A PE=2 SV=1	2079.61	3225.62	3775.92	4452.56	2762.86	3679.28	1614.27	4512.95	4499.25	4404.2	2762.86	2018.62	1	1	1	1	0	1
F2Z5U0	1	1	15.08	0.446059	1.44216	A	B	Uncharacterized protein OS=Sus scrofa GN=RPS27A PE=1 SV=1	580.361	2258.2	2208.77	2540.7	898.445	60.7065	450.498	3159.44	2631.9	2513.11	898.445	33.3063	0	0	0	1	0	0
I3LPA4	1	1	33.54	0.456894	1.27745	A	B	Kinesin-like protein (Fragment) OS=Sus scrofa GN=KIF21B PE=3 SV=1	12026	8176.92	7945.42	1943.79	8893.12	11197.9	9335.04	11440.3	9467.48	1922.67	8893.12	6143.66	0	0	0	0	1	0
F1RJ25;F1SSB5	6	6	387.38	0.459675	1.24681	A	B	Fructose-bisphosphate aldolase OS=Sus scrofa GN=ALDOC PE=3 SV=2	101960	140053	203824	155500	105797	96285.7	79145	195947	242870	153811	105797	52826.7	2	11	13	11	5	2	x
F1SHW9	4	4	96.27	0.467256	1.37535	B	A	Uncharacterized protein (Fragment) OS=Sus scrofa GN=NEB PE=4 SV=2	4413.36	3994.1	5084.03	9997.68	4568.44	3989.41	3425.82	5588.12	6057.94	9889.09	4568.44	2188.77	1	1	2	3	0	0	x
F1RNH2	1	1	15.73	0.498556	1.63619	B	A	Uncharacterized protein OS=Sus scrofa GN=LENG1 PE=4 SV=2	2265.73	1013.55	1867.89	1202.26	2060.05	5159.42	1758.75	1418.05	2225.71	1189.2	2060.05	2830.7	0	0	0	0	0	1
F1SAY2	1	1	14.15	0.563484	1.07365	A	B	Uncharacterized protein OS=Sus scrofa GN=TTF2 PE=4 SV=1	5991.16	5839	5052.2	1122.67	4807.56	9794.1	4650.57	8169.32	6020.01	1110.48	4807.56	5373.49	0	0	0	0	1	0
P49812	1	1	14.07	0.635877	1.1642	A	B	Myogenin OS=Sus scrofa GN=MYOG PE=3 SV=1	1579.11	2284.91	3877.68	3971.99	1066.13	1611.69	1225.77	3196.81	4620.5	3928.84	1066.13	884.246	1	0	0	0	0	0
Q2HYU1	1	1	51.62	0.660617	2.14754	A	B	Mitochondrial creatine kinase 2 OS=Sus scrofa GN=CKMT2 PE=2 SV=1	0	726.058	407.584	276.439	150.883	100.557	0	1015.82	485.662	273.437	150.883	55.1704	0	1	0	1	1	1
F1S557	4	4	92.18	0.684018	1.05644	A	B	Uncharacterized protein OS=Sus scrofa GN=AGL PE=4 SV=1	4901.55	4800.25	5337.59	5689.59	5864.61	2681.73	3804.77	6716.01	6360.08	5627.8	5864.61	1471.32	0	2	3	1	1	1	x
P02540	2	2	48.96	0.688072	1.13811	B	A	Desmin OS=Sus scrofa GN=DES PE=1 SV=4	4368.61	1812.51	2107.01	3070.39	1964.63	4397.74	3391.08	2535.87	2510.63	3037.04	1964.63	2412.8	1	1	0	1	1	2	x
Q5S1S4	5	5	272.92	0.691795	1.05266	A	B	Carbonic anhydrase 3 OS=Sus scrofa GN=CA3 PE=2 SV=3	60761.9	70733.1	73906.3	90350.2	57921.5	46854.5	47165.7	98962.3	88064.1	89368.9	57921.5	25706.5	5	7	8	7	8	4	x
F1SRI8	1	1	19.05	0.698833	4.4061	A	B	Uncharacterized protein (Fragment) OS=Sus scrofa GN=MYBPC1 PE=4 SV=2	0	1892.1	2553.99	949.288	59.7863	0	0	2647.23	3043.24	938.978	59.7863	0	0	1	0	0	0	0
F1RU49;F1RI39	17	17	866.52	0.759513	1.02694	A	B	Uncharacterized protein OS=Sus scrofa GN=LOC100519531 PE=4 SV=1	175361	174347	148424	152196	149252	183618	136122	243928	176857	150543	149252	100741	15	23	23	23	18	20	x
I3LM21	2	2	73.2	0.779586	1.09507	A	B	Kinesin-like protein (Fragment) OS=Sus scrofa PE=3 SV=1	21251.4	4702.06	7206.82	1832.97	18046.9	10401.7	16496.2	6578.63	8587.39	1813.07	18046.9	5706.85	1	1	2	0	2	0	x
F1RRJ1	1	1	29.89	0.837744	1.05175	B	A	Uncharacterized protein OS=Sus scrofa GN=LOC100736996 PE=4 SV=2	15584.5	14015	12043.3	6142.5	13803.4	23851.8	12097.3	19608.3	14350.4	6075.78	13803.4	13086.2	0	0	1	0	1	1
F1SRC5	1	1	40.48	0.878921	1.03463	A	B	Aconitate hydratase, mitochondrial (Fragment) OS=Sus scrofa GN=ACO2 PE=4 SV=2	972.892	1488.51	1140.99	1132.87	1305.09	1043.85	755.196	2082.56	1359.56	1120.56	1305.09	572.705	0	1	1	1	1	1
F1SR85	1	1	34.87	0.881878	1.03008	B	A	Uncharacterized protein OS=Sus scrofa GN=ABCB6 PE=3 SV=1	19383.8	21238	27892.1	25331.5	18042.8	27200.5	15046.5	29714	33235.2	25056.3	18042.8	14923.4	0	0	0	0	1	0
F1SGI7	1	1	26.15	0.88469	2.47621	A	B	Uncharacterized protein (Fragment) OS=Sus scrofa GN=KRT75 PE=3 SV=2	1692.73	3157.42	0	795.915	1162.78	0	1313.96	4417.53	0	787.27	1162.78	0	0	1	0	0	2	0
F1SA70;A5A8V7;F1RS36	4	4	99.02	0.973094	1.06186	B	A	Uncharacterized protein OS=Sus scrofa GN=HSPA2 PE=3 SV=1	31053.5	13657.6	14343.8	9547.37	16534.4	36626.5	24104.9	19108.3	17091.5	9443.67	16534.4	20095	1	3	2	3	0	1	x
