# Supplementary material for: Increased intramuscular fat induced by reduced dietary protein in finishing pigs: effects on the longissimus lumborum muscle proteome
Source: Royal Society of Chemistry journal article supplement (doi:10.1039/c6mb00213g), 2016-06-01
Supplement: c6mb00213g5.pdf [file c6mb00213g5.pdf]

(A) GO Molecular function

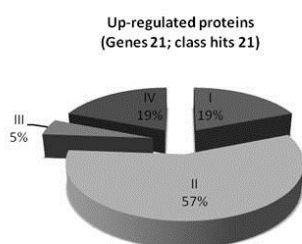

- I. Binding (GO: 0005488)  
(LOC100519531, AKAp9, MYL1, CASQ1)
- II. Catalytic activity (GO: 0003824)  
(AKAp9, ENO3, TPM1, LOC100302368, ADSSL1, CHFR, CKM, PGM1, GAPDHS, PFKM, LDHA, GAPDH)
- III. Enzyme regulator activity (GO: 0030234)  
(AKAp9)
- IV. Structural molecule activity (GO: 0005198)  
(LOC100519531, TPM1, KRT75, MYL1)

(B) GO Biological process

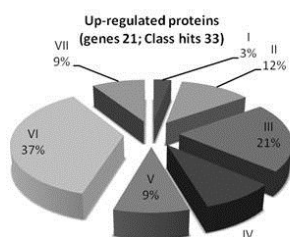

- I. Biological regulation (GO: 0065007)  
(AKAp9)
- II. Cellular component organization or biogenesis (GO: 0071840)  
(LOC100519531, AKAp9, TPM1; KRT75)
- III. Cellular process (GO: 0009987)  
(LOC100519531, AKAp9, TPM1; KRT75; ADSSL1; PGM1; CASQ1)
- IV. Developmental process (GO: 0032502)  
(LOC100519531; TPM1; KRT75)
- V. Localization (GO: 0051179)  
(AKAp9; HBB; ALB)
- VI. Metabolic process (GO: 0008152)  
(AKAp9; ENO3; TPM1; LOC100302368; ADSSL1; CHFR; CKM; PGM1; GAPDHS; PFKM; LDHA; GAPDH)
- VII. Multicellular organismal process (GO: 0032501)  
(TPM1; HBB; MYL1)

(C) GO Cellular component

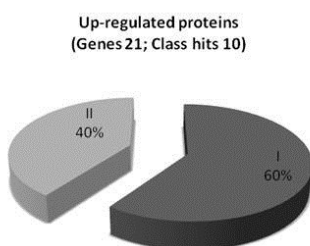

- I. Cell part (GO: 0044464)  
(LOC100519531; TPM1; KRT75; ADSSL1; PGM1; MYL1)
- II. Organelle (GO: 0043226)  
(LOC100519531; TPM1; KRT75; MYL1)

**Fig. S1** Muscle proteins differently expressed between pigs fed NPD and RPD analysed with the Panther bioinformatics tool (<http://www.pantherdb.org>), using the following gene ontology categories: (A) GO molecular function pie chart shows the number of the up-expressed proteins involved in molecular activity of the cell. (B) GO biological process pie chart indicate the number of the up-expressed proteins involved in each biological process. (C) GO Cellular component pie chart shows the localization of the up-expressed proteins in the cell. For each category the percentage of the total number of proteins in the pie chart is indicated for each Gene Ontology term.
